# Supplementary material for: Development of antibody-dependent cell cytotoxicity function in HIV-1 antibodies
Source: eLife. 2021 Jan 11;10:e63444. doi: 10.7554/eLife.63444 (PMC7884072; doi:10.7554/eLife.63444)
Supplement: Figure 3—source data 1. [file elife-63444-fig3-data1.csv]

RFADCC experiment date	006-0VH 006-0VL	006-mVH 006-mVL	016-0VH 016-0VL	016-mVH 016-mVL	067-0VH 067-0VL	067-mVH 067-mVL	072-0VH 072-0VK	072-mVH 072-mVK	105-0VH 105-0VK	105-mVH 105-mVK	157-0VH 157-0VK	157-mVH 157-mVK
2019.05.23									-1.8	70.38
2019.06.13					0	112.39
2019.06.19					-5.21	92.38			1.43	84.57
2019.07.11					-1.66	108.01
2019.08.13					-10.34	129.79	3.75	127.97			66.64	91.17
2019.08.27											77.19	76.43
2019.10.08							-3.05	76.96
2019.10.10	-5.14	131.97	-5.14	95.48	-2.98	82.91	-5.14	93.31	0	89.26	52.09	83.35
2019.11.07	-5.08	86.33	-5.08	82.82		90.37	9.21	81.52		71.13	76.15	92.83
2020.01.15							21.14	130.85
2020.06.11	-4.54	84.41	-4.48	84.72	-7.93	149.44	17.33	100.59	-1.62	68.54	68.95	99.99
2020.07.22									-0.71	90.93	71.27	109.58
2020.08.03	0.32	99.07	-1.1	78.47	-0.5	90.02			0.22	81.02
2020.08.12	4.3	92.78	0	80.76	0	87.67	15.68	93.23
