# Supplementary material for: Development of antibody-dependent cell cytotoxicity function in HIV-1 antibodies
Source: eLife. 2021 Jan 11;10:e63444. doi: 10.7554/eLife.63444 (PMC7884072; doi:10.7554/eLife.63444)
Supplement: Figure 5—source data 1. — Duplicate columns accommodate for instances when two replicates were run on the same day. [file elife-63444-fig5-data1.csv]

Ab lineage (top row); mAb (columns)	6	6	6	6	6	6	6	6	6	6	16	16	16	16	16	16	16	16	16	16	67	67	67	67	67	67	67	67	67	67	67	67	67	67	72	72	72	72	72	72	72	72	72	72	72	72	105	105	105
RFADCC experiment date (rows)	0VH 0VL	0VH 0VL	1VH 0VL	1VH 0VL	1VH AVL	1VH AVL	1VH 1VL	1VH 1VL	mVH mVL	mVH mVL	0VH 0VL	0VH 0VL	1VH 1VL	1VH 1VL	1VH 2VL	1VH 2VL	2VH 2VL	2VH 2VL	mVH mVL	mVH mVL	0VH 0VL	0VH 0VL	1VH 0VL	1VH 0VL	0VH 1VL	0VH 1VL	1VH 1VL	1VH 1VL	2VH 1VL	2VH 1VL	1VH 2VL	1VH 2VL	mVH mVL	mVH mVL	0VH 0VK	0VH 0VK	1VH 0VK	1VH 0VK	2VH 0VK	2VH 0VK	3VH 0VK	3VH 0VK	4VH 0VK	4VH 0VK	mVH mVK	mVH mVK	0VH 0VK	0VH 0VK	0VH 1VK
2019.05.23																																															-2.55
2019.06.13					10.84		90.9		100												0		0				34.81						100
2019.06.19					25.53		76.39		100												-5.64		-5.64				17.36						100														1.69
2019.07.11																					-1.54		-2.1				36.79						100
2019.08.13																					-7.96		-7.96		-6.86		75.48		70.02		85.63		100		2.93		14.16		37.44		48.69		85.59		100
2019.08.27
2019.10.08																																			-3.96										100
2019.10.10	-3.89	-2.24	2.21		-2.02	3.25	87.88	99.88	100		-5.38	-5.38	3.22		60.65	42.11	115.61	96.1	100		-3.6	-6.09	-6.2	-0.11	-1.42	-6.09	20.79	53.96	25.69	32.45	44.76	27.55	100	100	-5.51	-5.51	-5.51	-5.51	7.75	9.88	13.28	10.38	54.41	47.75	100		0	0	0
2019.11.07	-5.88		2.32	2.31	6.86				100		-6.13		-6.13	11.51	45.34		84.45		100										74.09		72.07		100		11.3		17.34		51.97		56.12		92.02		100				-7.59
2020.01.15																																			16.15										100
2020.06.11	-5.38		56.51		56.51		112.9		100												-5.31		-0.65		10.81		69.81		61.27		61.48		100		17.23		24.44		59.79		61.65		116.39		100		-2.36		-2.36
2020.07.22																																															-0.79		2.21
2020.08.03	0.32		4.1		17.3		98.57		100		-1.41		11.18		59.04		90.5		100		-0.55		2.68		1.1		36.67		27.8		39.83		100														0.27		6.39
2020.08.12	4.63		22.34		35		99.68		100		0		36.52		73.75		100		100		0		0		4.66		56.62		56.79		68.96		100		16.81		21.88		35.34		36.63		76.3		100
2020.08.25																																			8.17		11.94		33.82		27.76		63.14		100
[truncated: 13 more columns]
