# Supplementary material for: Development of antibody-dependent cell cytotoxicity function in HIV-1 antibodies
Source: eLife. 2021 Jan 11;10:e63444. doi: 10.7554/eLife.63444 (PMC7884072; doi:10.7554/eLife.63444)
Supplement: Figure 6—source data 1. — Unlike the Maerials and methods section details for other RFADCC assays, data here are processed without normalization, just subtraction of background and negative-control signal from each sample’s activity. [file elife-63444-fig6-data1.csv]

	Rep1	Rep2	Rep3	Rep1	Rep2	Rep3	Rep1	Rep2	Rep3	Rep1	Rep2	Rep3	Rep1	Rep2	Rep3	Rep1	Rep2	Rep3	Rep1	Rep2	Rep3
105 lineage	0VH0VK			0VH1VK			1VH1VK			1VH2VK			mVHmVK			HIVIG			C11
BL035 clade D/A	-1.305	-0.615		-0.92	-1.57		1.265	0.39		16.895	19.355		23.145	23.055		30.845	28.105		44.045	38.105
BG505 clade A	-0.05	-0.44	-0.155	-0.76	0.115	1.146666667	8.45	14.385	14.46666667	36.65	39.485	23.81666667	36.2	40.635	28.81666667	32.8	32.935		51.55	50.085	39.51666667
CAP210 clade C	-2.51	-1.875		-2.925	-1.69		-1.45	-0.655		35.205	36.17		39.405	40.47		22.555	20.12		23.455	18.22
157 lineage	0VHAVK			0VH0VK			mVHmVK			HIVIG			C11
BL035 clade D/A	-0.855	-0.97		24.645	21.005		37.945	37.505		30.845	28.105		44.045	38.105
QA255 clade A autologous TF	-0.38	-3.575	-0.356666667	8.35	5.015	8.256666667	21.5	25.865	16.30666667	9.65	10.515		6.8	5.215	6.456666667
BG505 clade A	-0.55	-0.82	-0.028333333	47.65	45.885	32.01666667	44.45	45.285	30.26666667	32.8	32.935		51.55	50.085	39.51666667
CAP210 clade C	-2.675	-1.65		8.705	6.47		19.055	19.52		22.555	20.12		23.455	18.22
MK184 clade C/D	-2.035	-2.94		-1.635	-2.1		16.28	17.49		19.78	16.49		14.13	9.64
SF162 clade B	-2.885	-2.86		-0.93	-0.915		27.815	24.835		12.465	11.835		20.715	19.835
