# Supplementary material for: Development of antibody-dependent cell cytotoxicity function in HIV-1 antibodies
Source: eLife. 2021 Jan 11;10:e63444. doi: 10.7554/eLife.63444 (PMC7884072; doi:10.7554/eLife.63444)
Supplement: Figure 8—source data 1. [file elife-63444-fig8-data1.csv]

	log(1/nM) where nM is binding affinity (KD)	average monoclonal-normalized RFADCC
006-1VH0VL	-1.727	19.43
006-1VH1VL	3	93.67
006-mVHmVL	0.204	98.3
016-1VH1VL	-1.327	26.65
016-1VH2VL	-0.83	67.27
016-2VH2VL	-0.281	69.89
016-mVHmVL	0.135	88.4
067-0VH1VL	-1.808	7.23
067-1VH1VL	-0.553	53.7
067-2VH1VL	-0.65	62.6
067-1VH2VL	-0.753	71.95
067-mVHmVL	-0.111	108.95
072-0VH0VK	-1.537	12.65
072-1VH0VK	-1.324	18.81
072-2VH0VK	-1.476	41.4
072-3VH0VK	-1.053	44.94
072-4VH0VK	-0.49	84.02
072-mVHmVK	0.77	102.28
105-0VH0VK	-1.369	0.6
105-0VH1VK	-1.107	1.85
105-1VH1VK	-1.143	21.03
105-1VH2VK	-0.387	65.75
105-mVHmVK	-0.137	81.05
157-0VH0VK	-4.614	72.2
157-mVHmVK	-1.953	95.71
