# Supplementary material for: Development of antibody-dependent cell cytotoxicity function in HIV-1 antibodies
Source: eLife. 2021 Jan 11;10:e63444. doi: 10.7554/eLife.63444 (PMC7884072; doi:10.7554/eLife.63444)
Supplement: Figure 9—source data 2. — This file contains raw counts of each sequence for each sample, with annotated information for each sequence and peptide (replicate 1). [file elife-63444-fig9-data2.csv]

id	Virus_Protein_Loc_AA	Oligo	xQA255_105_mature_r1	xQA255_105_mature_r2	xQA255_105_naive_r1	xQA255_105_naive_r2	input_r1	input_r2
0	BG505_gp41_1_G	aggaattctacgctgagtGGTGGTGGAGGTTCCGGGGGAGGAGGTTCGGGCGGTGGGGGAAGTGGTGTTGGAATAGGAGCTGTCTTCCTTGGGTTCTTAGGAGCAGCAGGAtgatagcaagcttgcc	0	0	0	0	0	0
1	BG505_gp41_1_E	aggaattctacgctgagtGGTGGTGGAGGTTCCGGGGGAGGAGGTTCGGGCGGTGGGGGAAGTGAAGTTGGAATAGGAGCTGTCTTCCTTGGGTTCTTAGGAGCAGCAGGAtgatagcaagcttgcc	0	0	0	0	0	0
2	BG505_gp41_1_D	aggaattctacgctgagtGGTGGTGGAGGTTCCGGGGGAGGAGGTTCGGGCGGTGGGGGAAGTGACGTTGGAATAGGAGCTGTCTTCCTTGGGTTCTTAGGAGCAGCAGGAtgatagcaagcttgcc	0	0	0	0	0	0
3	BG505_gp41_1_V	aggaattctacgctgagtGGTGGTGGAGGTTCCGGGGGAGGAGGTTCGGGCGGTGGGGGAAGTGTTGTTGGAATAGGAGCTGTCTTCCTTGGGTTCTTAGGAGCAGCAGGAtgatagcaagcttgcc	0	0	0	0	0	0
4	BG505_gp41_1_A	aggaattctacgctgagtGGTGGTGGAGGTTCCGGGGGAGGAGGTTCGGGCGGTGGGGGAAGTGCTGTTGGAATAGGAGCTGTCTTCCTTGGGTTCTTAGGAGCAGCAGGAtgatagcaagcttgcc	0	0	0	0	0	0
5	BG505_gp41_1_R	aggaattctacgctgagtGGTGGTGGAGGTTCCGGGGGAGGAGGTTCGGGCGGTGGGGGAAGTCGTGTTGGAATAGGAGCTGTCTTCCTTGGGTTCTTAGGAGCAGCAGGAtgatagcaagcttgcc	0	0	0	0	0	0
6	BG505_gp41_1_S	aggaattctacgctgagtGGTGGTGGAGGTTCCGGGGGAGGAGGTTCGGGCGGTGGGGGAAGTTCTGTTGGAATAGGAGCTGTCTTCCTTGGGTTCTTAGGAGCAGCAGGAtgatagcaagcttgcc	0	0	0	0	0	0
7	BG505_gp41_1_K	aggaattctacgctgagtGGTGGTGGAGGTTCCGGGGGAGGAGGTTCGGGCGGTGGGGGAAGTAAAGTTGGAATAGGAGCTGTCTTCCTTGGGTTCTTAGGAGCAGCAGGAtgatagcaagcttgcc	0	0	0	0	0	0
8	BG505_gp41_1_N	aggaattctacgctgagtGGTGGTGGAGGTTCCGGGGGAGGAGGTTCGGGCGGTGGGGGAAGTAACGTTGGAATAGGAGCTGTCTTCCTTGGGTTCTTAGGAGCAGCAGGAtgatagcaagcttgcc	0	0	0	0	0	0
9	BG505_gp41_1_M	aggaattctacgctgagtGGTGGTGGAGGTTCCGGGGGAGGAGGTTCGGGCGGTGGGGGAAGTATGGTTGGAATAGGAGCTGTCTTCCTTGGGTTCTTAGGAGCAGCAGGAtgatagcaagcttgcc	0	0	0	0	0	0
10	BG505_gp41_1_I	aggaattctacgctgagtGGTGGTGGAGGTTCCGGGGGAGGAGGTTCGGGCGGTGGGGGAAGTATCGTTGGAATAGGAGCTGTCTTCCTTGGGTTCTTAGGAGCAGCAGGAtgatagcaagcttgcc	0	0	0	0	4	0
11	BG505_gp41_1_T	aggaattctacgctgagtGGTGGTGGAGGTTCCGGGGGAGGAGGTTCGGGCGGTGGGGGAAGTACCGTTGGAATAGGAGCTGTCTTCCTTGGGTTCTTAGGAGCAGCAGGAtgatagcaagcttgcc	0	0	0	0	0	0
12	BG505_gp41_1_W	aggaattctacgctgagtGGTGGTGGAGGTTCCGGGGGAGGAGGTTCGGGCGGTGGGGGAAGTTGGGTTGGAATAGGAGCTGTCTTCCTTGGGTTCTTAGGAGCAGCAGGAtgatagcaagcttgcc	0	0	0	0	0	0
13	BG505_gp41_1_C	aggaattctacgctgagtGGTGGTGGAGGTTCCGGGGGAGGAGGTTCGGGCGGTGGGGGAAGTTGCGTTGGAATAGGAGCTGTCTTCCTTGGGTTCTTAGGAGCAGCAGGAtgatagcaagcttgcc	0	0	0	0	0	0
14	BG505_gp41_1_Y	aggaattctacgctgagtGGTGGTGGAGGTTCCGGGGGAGGAGGTTCGGGCGGTGGGGGAAGTTACGTTGGAATAGGAGCTGTCTTCCTTGGGTTCTTAGGAGCAGCAGGAtgatagcaagcttgcc	0	0	0	0	0	0
15	BG505_gp41_1_L	aggaattctacgctgagtGGTGGTGGAGGTTCCGGGGGAGGAGGTTCGGGCGGTGGGGGAAGTCTGGTTGGAATAGGAGCTGTCTTCCTTGGGTTCTTAGGAGCAGCAGGAtgatagcaagcttgcc	0	0	0	0	0	0
16	BG505_gp41_1_F	aggaattctacgctgagtGGTGGTGGAGGTTCCGGGGGAGGAGGTTCGGGCGGTGGGGGAAGTTTCGTTGGAATAGGAGCTGTCTTCCTTGGGTTCTTAGGAGCAGCAGGAtgatagcaagcttgcc	0	0	0	0	0	0
17	BG505_gp41_1_Q	aggaattctacgctgagtGGTGGTGGAGGTTCCGGGGGAGGAGGTTCGGGCGGTGGGGGAAGTCAGGTTGGAATAGGAGCTGTCTTCCTTGGGTTCTTAGGAGCAGCAGGAtgatagcaagcttgcc	0	0	0	0	2	0
18	BG505_gp41_1_H	aggaattctacgctgagtGGTGGTGGAGGTTCCGGGGGAGGAGGTTCGGGCGGTGGGGGAAGTCACGTTGGAATAGGAGCTGTCTTCCTTGGGTTCTTAGGAGCAGCAGGAtgatagcaagcttgcc	0	0	0	0	0	0
19	BG505_gp41_1_P	aggaattctacgctgagtGGTGGTGGAGGTTCCGGGGGAGGAGGTTCGGGCGGTGGGGGAAGTCCGGTTGGAATAGGAGCTGTCTTCCTTGGGTTCTTAGGAGCAGCAGGAtgatagcaagcttgcc	0	0	0	0	0	0
20	BG505_gp41_2_G	aggaattctacgctgagtGGTGGAGGTTCCGGGGGAGGAGGTTCGGGCGGTGGGGGAAGTGCAGGTGGAATAGGAGCTGTCTTCCTTGGGTTCTTAGGAGCAGCAGGAAGCtgatagcaagcttgcc	0	0	0	0	0	0
21	BG505_gp41_2_E	aggaattctacgctgagtGGTGGAGGTTCCGGGGGAGGAGGTTCGGGCGGTGGGGGAAGTGCAGAAGGAATAGGAGCTGTCTTCCTTGGGTTCTTAGGAGCAGCAGGAAGCtgatagcaagcttgcc	0	0	0	0	3	0
22	BG505_gp41_2_D	aggaattctacgctgagtGGTGGAGGTTCCGGGGGAGGAGGTTCGGGCGGTGGGGGAAGTGCAGACGGAATAGGAGCTGTCTTCCTTGGGTTCTTAGGAGCAGCAGGAAGCtgatagcaagcttgcc	0	0	0	0	1	3
23	BG505_gp41_2_V	aggaattctacgctgagtGGTGGAGGTTCCGGGGGAGGAGGTTCGGGCGGTGGGGGAAGTGCAGTTGGAATAGGAGCTGTCTTCCTTGGGTTCTTAGGAGCAGCAGGAAGCtgatagcaagcttgcc	1	0	0	0	9	9
24	BG505_gp41_2_A	aggaattctacgctgagtGGTGGAGGTTCCGGGGGAGGAGGTTCGGGCGGTGGGGGAAGTGCAGCTGGAATAGGAGCTGTCTTCCTTGGGTTCTTAGGAGCAGCAGGAAGCtgatagcaagcttgcc	0	0	0	0	8	7
25	BG505_gp41_2_R	aggaattctacgctgagtGGTGGAGGTTCCGGGGGAGGAGGTTCGGGCGGTGGGGGAAGTGCACGTGGAATAGGAGCTGTCTTCCTTGGGTTCTTAGGAGCAGCAGGAAGCtgatagcaagcttgcc	0	0	0	0	7	2
26	BG505_gp41_2_S	aggaattctacgctgagtGGTGGAGGTTCCGGGGGAGGAGGTTCGGGCGGTGGGGGAAGTGCATCTGGAATAGGAGCTGTCTTCCTTGGGTTCTTAGGAGCAGCAGGAAGCtgatagcaagcttgcc	0	0	0	0	0	0
27	BG505_gp41_2_K	aggaattctacgctgagtGGTGGAGGTTCCGGGGGAGGAGGTTCGGGCGGTGGGGGAAGTGCAAAAGGAATAGGAGCTGTCTTCCTTGGGTTCTTAGGAGCAGCAGGAAGCtgatagcaagcttgcc	0	0	0	0	1	0
28	BG505_gp41_2_N	aggaattctacgctgagtGGTGGAGGTTCCGGGGGAGGAGGTTCGGGCGGTGGGGGAAGTGCAAACGGAATAGGAGCTGTCTTCCTTGGGTTCTTAGGAGCAGCAGGAAGCtgatagcaagcttgcc	0	0	0	0	5	4
29	BG505_gp41_2_M	aggaattctacgctgagtGGTGGAGGTTCCGGGGGAGGAGGTTCGGGCGGTGGGGGAAGTGCAATGGGAATAGGAGCTGTCTTCCTTGGGTTCTTAGGAGCAGCAGGAAGCtgatagcaagcttgcc	0	0	0	0	1	0
30	BG505_gp41_2_I	aggaattctacgctgagtGGTGGAGGTTCCGGGGGAGGAGGTTCGGGCGGTGGGGGAAGTGCAATCGGAATAGGAGCTGTCTTCCTTGGGTTCTTAGGAGCAGCAGGAAGCtgatagcaagcttgcc	1	0	0	0	22	18
31	BG505_gp41_2_T	aggaattctacgctgagtGGTGGAGGTTCCGGGGGAGGAGGTTCGGGCGGTGGGGGAAGTGCAACCGGAATAGGAGCTGTCTTCCTTGGGTTCTTAGGAGCAGCAGGAAGCtgatagcaagcttgcc	0	1	17	0	90	73
32	BG505_gp41_2_W	aggaattctacgctgagtGGTGGAGGTTCCGGGGGAGGAGGTTCGGGCGGTGGGGGAAGTGCATGGGGAATAGGAGCTGTCTTCCTTGGGTTCTTAGGAGCAGCAGGAAGCtgatagcaagcttgcc	2	2	0	0	35	25
33	BG505_gp41_2_C	aggaattctacgctgagtGGTGGAGGTTCCGGGGGAGGAGGTTCGGGCGGTGGGGGAAGTGCATGCGGAATAGGAGCTGTCTTCCTTGGGTTCTTAGGAGCAGCAGGAAGCtgatagcaagcttgcc	0	0	0	0	0	0
34	BG505_gp41_2_Y	aggaattctacgctgagtGGTGGAGGTTCCGGGGGAGGAGGTTCGGGCGGTGGGGGAAGTGCATACGGAATAGGAGCTGTCTTCCTTGGGTTCTTAGGAGCAGCAGGAAGCtgatagcaagcttgcc	0	0	0	0	7	1
35	BG505_gp41_2_L	aggaattctacgctgagtGGTGGAGGTTCCGGGGGAGGAGGTTCGGGCGGTGGGGGAAGTGCACTGGGAATAGGAGCTGTCTTCCTTGGGTTCTTAGGAGCAGCAGGAAGCtgatagcaagcttgcc	0	0	0	0	15	9
36	BG505_gp41_2_F	aggaattctacgctgagtGGTGGAGGTTCCGGGGGAGGAGGTTCGGGCGGTGGGGGAAGTGCATTCGGAATAGGAGCTGTCTTCCTTGGGTTCTTAGGAGCAGCAGGAAGCtgatagcaagcttgcc	0	0	0	0	8	1
37	BG505_gp41_2_Q	aggaattctacgctgagtGGTGGAGGTTCCGGGGGAGGAGGTTCGGGCGGTGGGGGAAGTGCACAGGGAATAGGAGCTGTCTTCCTTGGGTTCTTAGGAGCAGCAGGAAGCtgatagcaagcttgcc	0	0	0	0	21	12
38	BG505_gp41_2_H	aggaattctacgctgagtGGTGGAGGTTCCGGGGGAGGAGGTTCGGGCGGTGGGGGAAGTGCACACGGAATAGGAGCTGTCTTCCTTGGGTTCTTAGGAGCAGCAGGAAGCtgatagcaagcttgcc	0	0	0	0	1	5
39	BG505_gp41_2_P	aggaattctacgctgagtGGTGGAGGTTCCGGGGGAGGAGGTTCGGGCGGTGGGGGAAGTGCACCGGGAATAGGAGCTGTCTTCCTTGGGTTCTTAGGAGCAGCAGGAAGCtgatagcaagcttgcc	0	0	0	0	0	1
40	BG505_gp41_3_G	aggaattctacgctgagtGGAGGTTCCGGGGGAGGAGGTTCGGGCGGTGGGGGAAGTGCAGTTGGTATAGGAGCTGTCTTCCTTGGGTTCTTAGGAGCAGCAGGAAGCACTtgatagcaagcttgcc	1	1	37	0	73	50
41	BG505_gp41_3_E	aggaattctacgctgagtGGAGGTTCCGGGGGAGGAGGTTCGGGCGGTGGGGGAAGTGCAGTTGAAATAGGAGCTGTCTTCCTTGGGTTCTTAGGAGCAGCAGGAAGCACTtgatagcaagcttgcc	1	0	0	0	114	80
42	BG505_gp41_3_D	aggaattctacgctgagtGGAGGTTCCGGGGGAGGAGGTTCGGGCGGTGGGGGAAGTGCAGTTGACATAGGAGCTGTCTTCCTTGGGTTCTTAGGAGCAGCAGGAAGCACTtgatagcaagcttgcc	2	5	16	0	143	109
43	BG505_gp41_3_V	aggaattctacgctgagtGGAGGTTCCGGGGGAGGAGGTTCGGGCGGTGGGGGAAGTGCAGTTGTTATAGGAGCTGTCTTCCTTGGGTTCTTAGGAGCAGCAGGAAGCACTtgatagcaagcttgcc	1	1	2	0	31	27
44	BG505_gp41_3_A	aggaattctacgctgagtGGAGGTTCCGGGGGAGGAGGTTCGGGCGGTGGGGGAAGTGCAGTTGCTATAGGAGCTGTCTTCCTTGGGTTCTTAGGAGCAGCAGGAAGCACTtgatagcaagcttgcc	1	0	0	3	81	60
45	BG505_gp41_3_R	aggaattctacgctgagtGGAGGTTCCGGGGGAGGAGGTTCGGGCGGTGGGGGAAGTGCAGTTCGTATAGGAGCTGTCTTCCTTGGGTTCTTAGGAGCAGCAGGAAGCACTtgatagcaagcttgcc	6	10	19	8	462	336
46	BG505_gp41_3_S	aggaattctacgctgagtGGAGGTTCCGGGGGAGGAGGTTCGGGCGGTGGGGGAAGTGCAGTTTCTATAGGAGCTGTCTTCCTTGGGTTCTTAGGAGCAGCAGGAAGCACTtgatagcaagcttgcc	2	0	0	12	85	59
47	BG505_gp41_3_K	aggaattctacgctgagtGGAGGTTCCGGGGGAGGAGGTTCGGGCGGTGGGGGAAGTGCAGTTAAAATAGGAGCTGTCTTCCTTGGGTTCTTAGGAGCAGCAGGAAGCACTtgatagcaagcttgcc	2	2	0	0	124	105
48	BG505_gp41_3_N	aggaattctacgctgagtGGAGGTTCCGGGGGAGGAGGTTCGGGCGGTGGGGGAAGTGCAGTTAACATAGGAGCTGTCTTCCTTGGGTTCTTAGGAGCAGCAGGAAGCACTtgatagcaagcttgcc	3	1	0	0	118	85
49	BG505_gp41_3_M	aggaattctacgctgagtGGAGGTTCCGGGGGAGGAGGTTCGGGCGGTGGGGGAAGTGCAGTTATGATAGGAGCTGTCTTCCTTGGGTTCTTAGGAGCAGCAGGAAGCACTtgatagcaagcttgcc	0	1	0	0	32	26
50	BG505_gp41_3_I	aggaattctacgctgagtGGAGGTTCCGGGGGAGGAGGTTCGGGCGGTGGGGGAAGTGCAGTTATCATAGGAGCTGTCTTCCTTGGGTTCTTAGGAGCAGCAGGAAGCACTtgatagcaagcttgcc	4	4	16	16	246	186
51	BG505_gp41_3_T	aggaattctacgctgagtGGAGGTTCCGGGGGAGGAGGTTCGGGCGGTGGGGGAAGTGCAGTTACCATAGGAGCTGTCTTCCTTGGGTTCTTAGGAGCAGCAGGAAGCACTtgatagcaagcttgcc	1	0	0	0	43	19
52	BG505_gp41_3_W	aggaattctacgctgagtGGAGGTTCCGGGGGAGGAGGTTCGGGCGGTGGGGGAAGTGCAGTTTGGATAGGAGCTGTCTTCCTTGGGTTCTTAGGAGCAGCAGGAAGCACTtgatagcaagcttgcc	0	2	9	0	20	12
53	BG505_gp41_3_C	aggaattctacgctgagtGGAGGTTCCGGGGGAGGAGGTTCGGGCGGTGGGGGAAGTGCAGTTTGCATAGGAGCTGTCTTCCTTGGGTTCTTAGGAGCAGCAGGAAGCACTtgatagcaagcttgcc	0	2	4	3	84	80
54	BG505_gp41_3_Y	aggaattctacgctgagtGGAGGTTCCGGGGGAGGAGGTTCGGGCGGTGGGGGAAGTGCAGTTTACATAGGAGCTGTCTTCCTTGGGTTCTTAGGAGCAGCAGGAAGCACTtgatagcaagcttgcc	0	1	0	0	29	25
55	BG505_gp41_3_L	aggaattctacgctgagtGGAGGTTCCGGGGGAGGAGGTTCGGGCGGTGGGGGAAGTGCAGTTCTGATAGGAGCTGTCTTCCTTGGGTTCTTAGGAGCAGCAGGAAGCACTtgatagcaagcttgcc	0	0	2	1	53	38
56	BG505_gp41_3_F	aggaattctacgctgagtGGAGGTTCCGGGGGAGGAGGTTCGGGCGGTGGGGGAAGTGCAGTTTTCATAGGAGCTGTCTTCCTTGGGTTCTTAGGAGCAGCAGGAAGCACTtgatagcaagcttgcc	0	0	0	0	31	14
57	BG505_gp41_3_Q	aggaattctacgctgagtGGAGGTTCCGGGGGAGGAGGTTCGGGCGGTGGGGGAAGTGCAGTTCAGATAGGAGCTGTCTTCCTTGGGTTCTTAGGAGCAGCAGGAAGCACTtgatagcaagcttgcc	3	4	10	0	152	134
58	BG505_gp41_3_H	aggaattctacgctgagtGGAGGTTCCGGGGGAGGAGGTTCGGGCGGTGGGGGAAGTGCAGTTCACATAGGAGCTGTCTTCCTTGGGTTCTTAGGAGCAGCAGGAAGCACTtgatagcaagcttgcc	2	4	12	3	113	89
59	BG505_gp41_3_P	aggaattctacgctgagtGGAGGTTCCGGGGGAGGAGGTTCGGGCGGTGGGGGAAGTGCAGTTCCGATAGGAGCTGTCTTCCTTGGGTTCTTAGGAGCAGCAGGAAGCACTtgatagcaagcttgcc	0	0	0	0	24	17
60	BG505_gp41_4_G	aggaattctacgctgagtGGTTCCGGGGGAGGAGGTTCGGGCGGTGGGGGAAGTGCAGTTGGAGGTGGAGCTGTCTTCCTTGGGTTCTTAGGAGCAGCAGGAAGCACTATGtgatagcaagcttgcc	6	2	0	38	144	97
61	BG505_gp41_4_E	aggaattctacgctgagtGGTTCCGGGGGAGGAGGTTCGGGCGGTGGGGGAAGTGCAGTTGGAGAAGGAGCTGTCTTCCTTGGGTTCTTAGGAGCAGCAGGAAGCACTATGtgatagcaagcttgcc	2	3	11	1	115	70
62	BG505_gp41_4_D	aggaattctacgctgagtGGTTCCGGGGGAGGAGGTTCGGGCGGTGGGGGAAGTGCAGTTGGAGACGGAGCTGTCTTCCTTGGGTTCTTAGGAGCAGCAGGAAGCACTATGtgatagcaagcttgcc	1	2	11	8	175	105
63	BG505_gp41_4_V	aggaattctacgctgagtGGTTCCGGGGGAGGAGGTTCGGGCGGTGGGGGAAGTGCAGTTGGAGTTGGAGCTGTCTTCCTTGGGTTCTTAGGAGCAGCAGGAAGCACTATGtgatagcaagcttgcc	0	1	0	0	12	12
64	BG505_gp41_4_A	aggaattctacgctgagtGGTTCCGGGGGAGGAGGTTCGGGCGGTGGGGGAAGTGCAGTTGGAGCTGGAGCTGTCTTCCTTGGGTTCTTAGGAGCAGCAGGAAGCACTATGtgatagcaagcttgcc	2	1	0	0	15	16
65	BG505_gp41_4_R	aggaattctacgctgagtGGTTCCGGGGGAGGAGGTTCGGGCGGTGGGGGAAGTGCAGTTGGACGTGGAGCTGTCTTCCTTGGGTTCTTAGGAGCAGCAGGAAGCACTATGtgatagcaagcttgcc	5	2	20	7	244	169
66	BG505_gp41_4_S	aggaattctacgctgagtGGTTCCGGGGGAGGAGGTTCGGGCGGTGGGGGAAGTGCAGTTGGATCTGGAGCTGTCTTCCTTGGGTTCTTAGGAGCAGCAGGAAGCACTATGtgatagcaagcttgcc	8	14	26	49	551	419
67	BG505_gp41_4_K	aggaattctacgctgagtGGTTCCGGGGGAGGAGGTTCGGGCGGTGGGGGAAGTGCAGTTGGAAAAGGAGCTGTCTTCCTTGGGTTCTTAGGAGCAGCAGGAAGCACTATGtgatagcaagcttgcc	4	1	2	0	54	41
68	BG505_gp41_4_N	aggaattctacgctgagtGGTTCCGGGGGAGGAGGTTCGGGCGGTGGGGGAAGTGCAGTTGGAAACGGAGCTGTCTTCCTTGGGTTCTTAGGAGCAGCAGGAAGCACTATGtgatagcaagcttgcc	14	4	19	0	425	309
69	BG505_gp41_4_M	aggaattctacgctgagtGGTTCCGGGGGAGGAGGTTCGGGCGGTGGGGGAAGTGCAGTTGGAATGGGAGCTGTCTTCCTTGGGTTCTTAGGAGCAGCAGGAAGCACTATGtgatagcaagcttgcc	3	0	7	0	10	14
70	BG505_gp41_4_I	aggaattctacgctgagtGGTTCCGGGGGAGGAGGTTCGGGCGGTGGGGGAAGTGCAGTTGGAATCGGAGCTGTCTTCCTTGGGTTCTTAGGAGCAGCAGGAAGCACTATGtgatagcaagcttgcc	1	4	15	3	55	33
71	BG505_gp41_4_T	aggaattctacgctgagtGGTTCCGGGGGAGGAGGTTCGGGCGGTGGGGGAAGTGCAGTTGGAACCGGAGCTGTCTTCCTTGGGTTCTTAGGAGCAGCAGGAAGCACTATGtgatagcaagcttgcc	1	0	0	0	48	48
72	BG505_gp41_4_W	aggaattctacgctgagtGGTTCCGGGGGAGGAGGTTCGGGCGGTGGGGGAAGTGCAGTTGGATGGGGAGCTGTCTTCCTTGGGTTCTTAGGAGCAGCAGGAAGCACTATGtgatagcaagcttgcc	1	2	1	0	86	70
73	BG505_gp41_4_C	aggaattctacgctgagtGGTTCCGGGGGAGGAGGTTCGGGCGGTGGGGGAAGTGCAGTTGGATGCGGAGCTGTCTTCCTTGGGTTCTTAGGAGCAGCAGGAAGCACTATGtgatagcaagcttgcc	0	1	0	1	88	95
74	BG505_gp41_4_Y	aggaattctacgctgagtGGTTCCGGGGGAGGAGGTTCGGGCGGTGGGGGAAGTGCAGTTGGATACGGAGCTGTCTTCCTTGGGTTCTTAGGAGCAGCAGGAAGCACTATGtgatagcaagcttgcc	0	3	0	5	119	112
75	BG505_gp41_4_L	aggaattctacgctgagtGGTTCCGGGGGAGGAGGTTCGGGCGGTGGGGGAAGTGCAGTTGGACTGGGAGCTGTCTTCCTTGGGTTCTTAGGAGCAGCAGGAAGCACTATGtgatagcaagcttgcc	1	4	21	26	168	135
76	BG505_gp41_4_F	aggaattctacgctgagtGGTTCCGGGGGAGGAGGTTCGGGCGGTGGGGGAAGTGCAGTTGGATTCGGAGCTGTCTTCCTTGGGTTCTTAGGAGCAGCAGGAAGCACTATGtgatagcaagcttgcc	2	1	6	0	103	70
77	BG505_gp41_4_Q	aggaattctacgctgagtGGTTCCGGGGGAGGAGGTTCGGGCGGTGGGGGAAGTGCAGTTGGACAGGGAGCTGTCTTCCTTGGGTTCTTAGGAGCAGCAGGAAGCACTATGtgatagcaagcttgcc	0	4	0	0	63	65
78	BG505_gp41_4_H	aggaattctacgctgagtGGTTCCGGGGGAGGAGGTTCGGGCGGTGGGGGAAGTGCAGTTGGACACGGAGCTGTCTTCCTTGGGTTCTTAGGAGCAGCAGGAAGCACTATGtgatagcaagcttgcc	0	1	2	0	72	58
79	BG505_gp41_4_P	aggaattctacgctgagtGGTTCCGGGGGAGGAGGTTCGGGCGGTGGGGGAAGTGCAGTTGGACCGGGAGCTGTCTTCCTTGGGTTCTTAGGAGCAGCAGGAAGCACTATGtgatagcaagcttgcc	6	10	60	4	607	469
80	BG505_gp41_5_G	aggaattctacgctgagtTCCGGGGGAGGAGGTTCGGGCGGTGGGGGAAGTGCAGTTGGAATAGGTGCTGTCTTCCTTGGGTTCTTAGGAGCAGCAGGAAGCACTATGGGCtgatagcaagcttgcc	1	4	35	26	156	149
81	BG505_gp41_5_E	aggaattctacgctgagtTCCGGGGGAGGAGGTTCGGGCGGTGGGGGAAGTGCAGTTGGAATAGAAGCTGTCTTCCTTGGGTTCTTAGGAGCAGCAGGAAGCACTATGGGCtgatagcaagcttgcc	6	5	28	0	304	231
82	BG505_gp41_5_D	aggaattctacgctgagtTCCGGGGGAGGAGGTTCGGGCGGTGGGGGAAGTGCAGTTGGAATAGACGCTGTCTTCCTTGGGTTCTTAGGAGCAGCAGGAAGCACTATGGGCtgatagcaagcttgcc	0	0	0	0	12	7
83	BG505_gp41_5_V	aggaattctacgctgagtTCCGGGGGAGGAGGTTCGGGCGGTGGGGGAAGTGCAGTTGGAATAGTTGCTGTCTTCCTTGGGTTCTTAGGAGCAGCAGGAAGCACTATGGGCtgatagcaagcttgcc	1	0	0	0	14	12
84	BG505_gp41_5_A	aggaattctacgctgagtTCCGGGGGAGGAGGTTCGGGCGGTGGGGGAAGTGCAGTTGGAATAGCTGCTGTCTTCCTTGGGTTCTTAGGAGCAGCAGGAAGCACTATGGGCtgatagcaagcttgcc	5	4	9	0	109	68
85	BG505_gp41_5_R	aggaattctacgctgagtTCCGGGGGAGGAGGTTCGGGCGGTGGGGGAAGTGCAGTTGGAATACGTGCTGTCTTCCTTGGGTTCTTAGGAGCAGCAGGAAGCACTATGGGCtgatagcaagcttgcc	2	0	0	0	94	105
86	BG505_gp41_5_S	aggaattctacgctgagtTCCGGGGGAGGAGGTTCGGGCGGTGGGGGAAGTGCAGTTGGAATATCTGCTGTCTTCCTTGGGTTCTTAGGAGCAGCAGGAAGCACTATGGGCtgatagcaagcttgcc	2	2	29	4	165	115
87	BG505_gp41_5_K	aggaattctacgctgagtTCCGGGGGAGGAGGTTCGGGCGGTGGGGGAAGTGCAGTTGGAATAAAAGCTGTCTTCCTTGGGTTCTTAGGAGCAGCAGGAAGCACTATGGGCtgatagcaagcttgcc	3	3	0	2	79	66
88	BG505_gp41_5_N	aggaattctacgctgagtTCCGGGGGAGGAGGTTCGGGCGGTGGGGGAAGTGCAGTTGGAATAAACGCTGTCTTCCTTGGGTTCTTAGGAGCAGCAGGAAGCACTATGGGCtgatagcaagcttgcc	0	0	2	0	38	28
89	BG505_gp41_5_M	aggaattctacgctgagtTCCGGGGGAGGAGGTTCGGGCGGTGGGGGAAGTGCAGTTGGAATAATGGCTGTCTTCCTTGGGTTCTTAGGAGCAGCAGGAAGCACTATGGGCtgatagcaagcttgcc	3	1	1	0	40	36
90	BG505_gp41_5_I	aggaattctacgctgagtTCCGGGGGAGGAGGTTCGGGCGGTGGGGGAAGTGCAGTTGGAATAATCGCTGTCTTCCTTGGGTTCTTAGGAGCAGCAGGAAGCACTATGGGCtgatagcaagcttgcc	0	0	0	0	45	30
91	BG505_gp41_5_T	aggaattctacgctgagtTCCGGGGGAGGAGGTTCGGGCGGTGGGGGAAGTGCAGTTGGAATAACCGCTGTCTTCCTTGGGTTCTTAGGAGCAGCAGGAAGCACTATGGGCtgatagcaagcttgcc	0	0	0	0	29	24
92	BG505_gp41_5_W	aggaattctacgctgagtTCCGGGGGAGGAGGTTCGGGCGGTGGGGGAAGTGCAGTTGGAATATGGGCTGTCTTCCTTGGGTTCTTAGGAGCAGCAGGAAGCACTATGGGCtgatagcaagcttgcc	0	3	0	0	68	60
93	BG505_gp41_5_C	aggaattctacgctgagtTCCGGGGGAGGAGGTTCGGGCGGTGGGGGAAGTGCAGTTGGAATATGCGCTGTCTTCCTTGGGTTCTTAGGAGCAGCAGGAAGCACTATGGGCtgatagcaagcttgcc	0	0	0	0	16	11
94	BG505_gp41_5_Y	aggaattctacgctgagtTCCGGGGGAGGAGGTTCGGGCGGTGGGGGAAGTGCAGTTGGAATATACGCTGTCTTCCTTGGGTTCTTAGGAGCAGCAGGAAGCACTATGGGCtgatagcaagcttgcc	4	1	18	0	148	132
95	BG505_gp41_5_L	aggaattctacgctgagtTCCGGGGGAGGAGGTTCGGGCGGTGGGGGAAGTGCAGTTGGAATACTGGCTGTCTTCCTTGGGTTCTTAGGAGCAGCAGGAAGCACTATGGGCtgatagcaagcttgcc	0	4	4	22	110	85
96	BG505_gp41_5_F	aggaattctacgctgagtTCCGGGGGAGGAGGTTCGGGCGGTGGGGGAAGTGCAGTTGGAATATTCGCTGTCTTCCTTGGGTTCTTAGGAGCAGCAGGAAGCACTATGGGCtgatagcaagcttgcc	0	0	0	0	16	13
97	BG505_gp41_5_Q	aggaattctacgctgagtTCCGGGGGAGGAGGTTCGGGCGGTGGGGGAAGTGCAGTTGGAATACAGGCTGTCTTCCTTGGGTTCTTAGGAGCAGCAGGAAGCACTATGGGCtgatagcaagcttgcc	2	1	19	0	57	40
98	BG505_gp41_5_H	aggaattctacgctgagtTCCGGGGGAGGAGGTTCGGGCGGTGGGGGAAGTGCAGTTGGAATACACGCTGTCTTCCTTGGGTTCTTAGGAGCAGCAGGAAGCACTATGGGCtgatagcaagcttgcc	0	0	0	0	14	7
99	BG505_gp41_5_P	aggaattctacgctgagtTCCGGGGGAGGAGGTTCGGGCGGTGGGGGAAGTGCAGTTGGAATACCGGCTGTCTTCCTTGGGTTCTTAGGAGCAGCAGGAAGCACTATGGGCtgatagcaagcttgcc	1	0	0	0	68	55
100	BG505_gp41_6_G	aggaattctacgctgagtGGGGGAGGAGGTTCGGGCGGTGGGGGAAGTGCAGTTGGAATAGGAGGTGTCTTCCTTGGGTTCTTAGGAGCAGCAGGAAGCACTATGGGCGCGtgatagcaagcttgcc	1	1	0	0	40	27
101	BG505_gp41_6_E	aggaattctacgctgagtGGGGGAGGAGGTTCGGGCGGTGGGGGAAGTGCAGTTGGAATAGGAGAAGTCTTCCTTGGGTTCTTAGGAGCAGCAGGAAGCACTATGGGCGCGtgatagcaagcttgcc	3	3	19	33	96	60
102	BG505_gp41_6_D	aggaattctacgctgagtGGGGGAGGAGGTTCGGGCGGTGGGGGAAGTGCAGTTGGAATAGGAGACGTCTTCCTTGGGTTCTTAGGAGCAGCAGGAAGCACTATGGGCGCGtgatagcaagcttgcc	0	1	0	0	68	44
103	BG505_gp41_6_V	aggaattctacgctgagtGGGGGAGGAGGTTCGGGCGGTGGGGGAAGTGCAGTTGGAATAGGAGTTGTCTTCCTTGGGTTCTTAGGAGCAGCAGGAAGCACTATGGGCGCGtgatagcaagcttgcc	0	0	0	0	69	50
104	BG505_gp41_6_A	aggaattctacgctgagtGGGGGAGGAGGTTCGGGCGGTGGGGGAAGTGCAGTTGGAATAGGAGCTGTCTTCCTTGGGTTCTTAGGAGCAGCAGGAAGCACTATGGGCGCGtgatagcaagcttgcc	3	4	3	2	174	117
105	BG505_gp41_6_R	aggaattctacgctgagtGGGGGAGGAGGTTCGGGCGGTGGGGGAAGTGCAGTTGGAATAGGACGTGTCTTCCTTGGGTTCTTAGGAGCAGCAGGAAGCACTATGGGCGCGtgatagcaagcttgcc	2	0	4	0	53	60
106	BG505_gp41_6_S	aggaattctacgctgagtGGGGGAGGAGGTTCGGGCGGTGGGGGAAGTGCAGTTGGAATAGGATCTGTCTTCCTTGGGTTCTTAGGAGCAGCAGGAAGCACTATGGGCGCGtgatagcaagcttgcc	8	3	14	24	623	435
107	BG505_gp41_6_K	aggaattctacgctgagtGGGGGAGGAGGTTCGGGCGGTGGGGGAAGTGCAGTTGGAATAGGAAAAGTCTTCCTTGGGTTCTTAGGAGCAGCAGGAAGCACTATGGGCGCGtgatagcaagcttgcc	1	7	29	0	130	119
108	BG505_gp41_6_N	aggaattctacgctgagtGGGGGAGGAGGTTCGGGCGGTGGGGGAAGTGCAGTTGGAATAGGAAACGTCTTCCTTGGGTTCTTAGGAGCAGCAGGAAGCACTATGGGCGCGtgatagcaagcttgcc	0	0	0	13	50	30
109	BG505_gp41_6_M	aggaattctacgctgagtGGGGGAGGAGGTTCGGGCGGTGGGGGAAGTGCAGTTGGAATAGGAATGGTCTTCCTTGGGTTCTTAGGAGCAGCAGGAAGCACTATGGGCGCGtgatagcaagcttgcc	2	2	1	0	36	34
110	BG505_gp41_6_I	aggaattctacgctgagtGGGGGAGGAGGTTCGGGCGGTGGGGGAAGTGCAGTTGGAATAGGAATCGTCTTCCTTGGGTTCTTAGGAGCAGCAGGAAGCACTATGGGCGCGtgatagcaagcttgcc	1	0	0	0	20	21
111	BG505_gp41_6_T	aggaattctacgctgagtGGGGGAGGAGGTTCGGGCGGTGGGGGAAGTGCAGTTGGAATAGGAACCGTCTTCCTTGGGTTCTTAGGAGCAGCAGGAAGCACTATGGGCGCGtgatagcaagcttgcc	3	1	0	2	212	157
112	BG505_gp41_6_W	aggaattctacgctgagtGGGGGAGGAGGTTCGGGCGGTGGGGGAAGTGCAGTTGGAATAGGATGGGTCTTCCTTGGGTTCTTAGGAGCAGCAGGAAGCACTATGGGCGCGtgatagcaagcttgcc	0	1	0	0	19	8
113	BG505_gp41_6_C	aggaattctacgctgagtGGGGGAGGAGGTTCGGGCGGTGGGGGAAGTGCAGTTGGAATAGGATGCGTCTTCCTTGGGTTCTTAGGAGCAGCAGGAAGCACTATGGGCGCGtgatagcaagcttgcc	2	1	0	16	100	69
114	BG505_gp41_6_Y	aggaattctacgctgagtGGGGGAGGAGGTTCGGGCGGTGGGGGAAGTGCAGTTGGAATAGGATACGTCTTCCTTGGGTTCTTAGGAGCAGCAGGAAGCACTATGGGCGCGtgatagcaagcttgcc	8	9	1	0	274	197
115	BG505_gp41_6_L	aggaattctacgctgagtGGGGGAGGAGGTTCGGGCGGTGGGGGAAGTGCAGTTGGAATAGGACTGGTCTTCCTTGGGTTCTTAGGAGCAGCAGGAAGCACTATGGGCGCGtgatagcaagcttgcc	0	0	0	0	6	0
116	BG505_gp41_6_F	aggaattctacgctgagtGGGGGAGGAGGTTCGGGCGGTGGGGGAAGTGCAGTTGGAATAGGATTCGTCTTCCTTGGGTTCTTAGGAGCAGCAGGAAGCACTATGGGCGCGtgatagcaagcttgcc	0	1	0	18	51	35
117	BG505_gp41_6_Q	aggaattctacgctgagtGGGGGAGGAGGTTCGGGCGGTGGGGGAAGTGCAGTTGGAATAGGACAGGTCTTCCTTGGGTTCTTAGGAGCAGCAGGAAGCACTATGGGCGCGtgatagcaagcttgcc	0	4	3	1	48	66
118	BG505_gp41_6_H	aggaattctacgctgagtGGGGGAGGAGGTTCGGGCGGTGGGGGAAGTGCAGTTGGAATAGGACACGTCTTCCTTGGGTTCTTAGGAGCAGCAGGAAGCACTATGGGCGCGtgatagcaagcttgcc	0	2	0	0	35	22
119	BG505_gp41_6_P	aggaattctacgctgagtGGGGGAGGAGGTTCGGGCGGTGGGGGAAGTGCAGTTGGAATAGGACCGGTCTTCCTTGGGTTCTTAGGAGCAGCAGGAAGCACTATGGGCGCGtgatagcaagcttgcc	0	0	0	2	46	42
120	BG505_gp41_7_G	aggaattctacgctgagtGGAGGAGGTTCGGGCGGTGGGGGAAGTGCAGTTGGAATAGGAGCTGGTTTCCTTGGGTTCTTAGGAGCAGCAGGAAGCACTATGGGCGCGGCGtgatagcaagcttgcc	1	1	0	0	71	56
121	BG505_gp41_7_E	aggaattctacgctgagtGGAGGAGGTTCGGGCGGTGGGGGAAGTGCAGTTGGAATAGGAGCTGAGTTCCTTGGGTTCTTAGGAGCAGCAGGAAGCACTATGGGCGCGGCGtgatagcaagcttgcc	0	0	0	0	1	0
122	BG505_gp41_7_D	aggaattctacgctgagtGGAGGAGGTTCGGGCGGTGGGGGAAGTGCAGTTGGAATAGGAGCTGACTTCCTTGGGTTCTTAGGAGCAGCAGGAAGCACTATGGGCGCGGCGtgatagcaagcttgcc	1	4	0	2	125	77
123	BG505_gp41_7_V	aggaattctacgctgagtGGAGGAGGTTCGGGCGGTGGGGGAAGTGCAGTTGGAATAGGAGCTGTTTTCCTTGGGTTCTTAGGAGCAGCAGGAAGCACTATGGGCGCGGCGtgatagcaagcttgcc	0	0	0	0	3	4
124	BG505_gp41_7_A	aggaattctacgctgagtGGAGGAGGTTCGGGCGGTGGGGGAAGTGCAGTTGGAATAGGAGCTGCTTTCCTTGGGTTCTTAGGAGCAGCAGGAAGCACTATGGGCGCGGCGtgatagcaagcttgcc	1	2	11	0	87	49
125	BG505_gp41_7_R	aggaattctacgctgagtGGAGGAGGTTCGGGCGGTGGGGGAAGTGCAGTTGGAATAGGAGCTCGTTTCCTTGGGTTCTTAGGAGCAGCAGGAAGCACTATGGGCGCGGCGtgatagcaagcttgcc	5	4	12	0	54	28
126	BG505_gp41_7_S	aggaattctacgctgagtGGAGGAGGTTCGGGCGGTGGGGGAAGTGCAGTTGGAATAGGAGCTTCTTTCCTTGGGTTCTTAGGAGCAGCAGGAAGCACTATGGGCGCGGCGtgatagcaagcttgcc	3	2	50	0	276	196
127	BG505_gp41_7_K	aggaattctacgctgagtGGAGGAGGTTCGGGCGGTGGGGGAAGTGCAGTTGGAATAGGAGCTAAATTCCTTGGGTTCTTAGGAGCAGCAGGAAGCACTATGGGCGCGGCGtgatagcaagcttgcc	0	0	0	0	57	34
128	BG505_gp41_7_N	aggaattctacgctgagtGGAGGAGGTTCGGGCGGTGGGGGAAGTGCAGTTGGAATAGGAGCTAACTTCCTTGGGTTCTTAGGAGCAGCAGGAAGCACTATGGGCGCGGCGtgatagcaagcttgcc	0	0	0	0	52	42
129	BG505_gp41_7_M	aggaattctacgctgagtGGAGGAGGTTCGGGCGGTGGGGGAAGTGCAGTTGGAATAGGAGCTATGTTCCTTGGGTTCTTAGGAGCAGCAGGAAGCACTATGGGCGCGGCGtgatagcaagcttgcc	1	6	14	0	120	105
130	BG505_gp41_7_I	aggaattctacgctgagtGGAGGAGGTTCGGGCGGTGGGGGAAGTGCAGTTGGAATAGGAGCTATCTTCCTTGGGTTCTTAGGAGCAGCAGGAAGCACTATGGGCGCGGCGtgatagcaagcttgcc	1	0	0	0	17	15
131	BG505_gp41_7_T	aggaattctacgctgagtGGAGGAGGTTCGGGCGGTGGGGGAAGTGCAGTTGGAATAGGAGCTACCTTCCTTGGGTTCTTAGGAGCAGCAGGAAGCACTATGGGCGCGGCGtgatagcaagcttgcc	0	1	0	9	37	28
132	BG505_gp41_7_W	aggaattctacgctgagtGGAGGAGGTTCGGGCGGTGGGGGAAGTGCAGTTGGAATAGGAGCTTGGTTCCTTGGGTTCTTAGGAGCAGCAGGAAGCACTATGGGCGCGGCGtgatagcaagcttgcc	0	0	0	5	8	11
133	BG505_gp41_7_C	aggaattctacgctgagtGGAGGAGGTTCGGGCGGTGGGGGAAGTGCAGTTGGAATAGGAGCTTGCTTCCTTGGGTTCTTAGGAGCAGCAGGAAGCACTATGGGCGCGGCGtgatagcaagcttgcc	0	0	0	0	30	33
134	BG505_gp41_7_Y	aggaattctacgctgagtGGAGGAGGTTCGGGCGGTGGGGGAAGTGCAGTTGGAATAGGAGCTTACTTCCTTGGGTTCTTAGGAGCAGCAGGAAGCACTATGGGCGCGGCGtgatagcaagcttgcc	0	1	0	0	71	47
135	BG505_gp41_7_L	aggaattctacgctgagtGGAGGAGGTTCGGGCGGTGGGGGAAGTGCAGTTGGAATAGGAGCTCTGTTCCTTGGGTTCTTAGGAGCAGCAGGAAGCACTATGGGCGCGGCGtgatagcaagcttgcc	5	3	0	0	113	56
136	BG505_gp41_7_F	aggaattctacgctgagtGGAGGAGGTTCGGGCGGTGGGGGAAGTGCAGTTGGAATAGGAGCTTTCTTCCTTGGGTTCTTAGGAGCAGCAGGAAGCACTATGGGCGCGGCGtgatagcaagcttgcc	0	0	0	0	34	24
137	BG505_gp41_7_Q	aggaattctacgctgagtGGAGGAGGTTCGGGCGGTGGGGGAAGTGCAGTTGGAATAGGAGCTCAGTTCCTTGGGTTCTTAGGAGCAGCAGGAAGCACTATGGGCGCGGCGtgatagcaagcttgcc	9	1	0	0	93	57
138	BG505_gp41_7_H	aggaattctacgctgagtGGAGGAGGTTCGGGCGGTGGGGGAAGTGCAGTTGGAATAGGAGCTCACTTCCTTGGGTTCTTAGGAGCAGCAGGAAGCACTATGGGCGCGGCGtgatagcaagcttgcc	4	2	11	11	281	197
139	BG505_gp41_7_P	aggaattctacgctgagtGGAGGAGGTTCGGGCGGTGGGGGAAGTGCAGTTGGAATAGGAGCTCCGTTCCTTGGGTTCTTAGGAGCAGCAGGAAGCACTATGGGCGCGGCGtgatagcaagcttgcc	2	2	3	5	316	199
140	BG505_gp41_8_G	aggaattctacgctgagtGGAGGTTCGGGCGGTGGGGGAAGTGCAGTTGGAATAGGAGCTGTCGGTCTTGGGTTCTTAGGAGCAGCAGGAAGCACTATGGGCGCGGCGTCAtgatagcaagcttgcc	0	1	2	0	45	33
141	BG505_gp41_8_E	aggaattctacgctgagtGGAGGTTCGGGCGGTGGGGGAAGTGCAGTTGGAATAGGAGCTGTCGAACTTGGGTTCTTAGGAGCAGCAGGAAGCACTATGGGCGCGGCGTCAtgatagcaagcttgcc	0	0	18	0	44	45
142	BG505_gp41_8_D	aggaattctacgctgagtGGAGGTTCGGGCGGTGGGGGAAGTGCAGTTGGAATAGGAGCTGTCGACCTTGGGTTCTTAGGAGCAGCAGGAAGCACTATGGGCGCGGCGTCAtgatagcaagcttgcc	2	2	0	5	50	48
143	BG505_gp41_8_V	aggaattctacgctgagtGGAGGTTCGGGCGGTGGGGGAAGTGCAGTTGGAATAGGAGCTGTCGTTCTTGGGTTCTTAGGAGCAGCAGGAAGCACTATGGGCGCGGCGTCAtgatagcaagcttgcc	0	1	3	9	68	58
144	BG505_gp41_8_A	aggaattctacgctgagtGGAGGTTCGGGCGGTGGGGGAAGTGCAGTTGGAATAGGAGCTGTCGCTCTTGGGTTCTTAGGAGCAGCAGGAAGCACTATGGGCGCGGCGTCAtgatagcaagcttgcc	2	3	0	0	87	58
145	BG505_gp41_8_R	aggaattctacgctgagtGGAGGTTCGGGCGGTGGGGGAAGTGCAGTTGGAATAGGAGCTGTCCGTCTTGGGTTCTTAGGAGCAGCAGGAAGCACTATGGGCGCGGCGTCAtgatagcaagcttgcc	3	4	0	0	122	82
146	BG505_gp41_8_S	aggaattctacgctgagtGGAGGTTCGGGCGGTGGGGGAAGTGCAGTTGGAATAGGAGCTGTCTCTCTTGGGTTCTTAGGAGCAGCAGGAAGCACTATGGGCGCGGCGTCAtgatagcaagcttgcc	0	0	1	0	79	63
147	BG505_gp41_8_K	aggaattctacgctgagtGGAGGTTCGGGCGGTGGGGGAAGTGCAGTTGGAATAGGAGCTGTCAAACTTGGGTTCTTAGGAGCAGCAGGAAGCACTATGGGCGCGGCGTCAtgatagcaagcttgcc	0	0	4	0	32	17
148	BG505_gp41_8_N	aggaattctacgctgagtGGAGGTTCGGGCGGTGGGGGAAGTGCAGTTGGAATAGGAGCTGTCAACCTTGGGTTCTTAGGAGCAGCAGGAAGCACTATGGGCGCGGCGTCAtgatagcaagcttgcc	5	1	6	0	120	119
149	BG505_gp41_8_M	aggaattctacgctgagtGGAGGTTCGGGCGGTGGGGGAAGTGCAGTTGGAATAGGAGCTGTCATGCTTGGGTTCTTAGGAGCAGCAGGAAGCACTATGGGCGCGGCGTCAtgatagcaagcttgcc	0	0	19	0	86	48
150	BG505_gp41_8_I	aggaattctacgctgagtGGAGGTTCGGGCGGTGGGGGAAGTGCAGTTGGAATAGGAGCTGTCATCCTTGGGTTCTTAGGAGCAGCAGGAAGCACTATGGGCGCGGCGTCAtgatagcaagcttgcc	4	3	3	0	218	176
151	BG505_gp41_8_T	aggaattctacgctgagtGGAGGTTCGGGCGGTGGGGGAAGTGCAGTTGGAATAGGAGCTGTCACCCTTGGGTTCTTAGGAGCAGCAGGAAGCACTATGGGCGCGGCGTCAtgatagcaagcttgcc	1	2	17	0	55	46
152	BG505_gp41_8_W	aggaattctacgctgagtGGAGGTTCGGGCGGTGGGGGAAGTGCAGTTGGAATAGGAGCTGTCTGGCTTGGGTTCTTAGGAGCAGCAGGAAGCACTATGGGCGCGGCGTCAtgatagcaagcttgcc	4	12	65	1	405	285
153	BG505_gp41_8_C	aggaattctacgctgagtGGAGGTTCGGGCGGTGGGGGAAGTGCAGTTGGAATAGGAGCTGTCTGCCTTGGGTTCTTAGGAGCAGCAGGAAGCACTATGGGCGCGGCGTCAtgatagcaagcttgcc	1	0	0	0	28	18
154	BG505_gp41_8_Y	aggaattctacgctgagtGGAGGTTCGGGCGGTGGGGGAAGTGCAGTTGGAATAGGAGCTGTCTACCTTGGGTTCTTAGGAGCAGCAGGAAGCACTATGGGCGCGGCGTCAtgatagcaagcttgcc	1	0	11	0	70	43
155	BG505_gp41_8_L	aggaattctacgctgagtGGAGGTTCGGGCGGTGGGGGAAGTGCAGTTGGAATAGGAGCTGTCCTGCTTGGGTTCTTAGGAGCAGCAGGAAGCACTATGGGCGCGGCGTCAtgatagcaagcttgcc	4	2	0	0	134	111
156	BG505_gp41_8_F	aggaattctacgctgagtGGAGGTTCGGGCGGTGGGGGAAGTGCAGTTGGAATAGGAGCTGTCTTCCTTGGGTTCTTAGGAGCAGCAGGAAGCACTATGGGCGCGGCGTCAtgatagcaagcttgcc	2	4	14	0	115	77
157	BG505_gp41_8_Q	aggaattctacgctgagtGGAGGTTCGGGCGGTGGGGGAAGTGCAGTTGGAATAGGAGCTGTCCAGCTTGGGTTCTTAGGAGCAGCAGGAAGCACTATGGGCGCGGCGTCAtgatagcaagcttgcc	2	0	0	21	54	30
158	BG505_gp41_8_H	aggaattctacgctgagtGGAGGTTCGGGCGGTGGGGGAAGTGCAGTTGGAATAGGAGCTGTCCACCTTGGGTTCTTAGGAGCAGCAGGAAGCACTATGGGCGCGGCGTCAtgatagcaagcttgcc	2	2	0	0	93	60
159	BG505_gp41_8_P	aggaattctacgctgagtGGAGGTTCGGGCGGTGGGGGAAGTGCAGTTGGAATAGGAGCTGTCCCGCTTGGGTTCTTAGGAGCAGCAGGAAGCACTATGGGCGCGGCGTCAtgatagcaagcttgcc	3	1	4	0	27	27
160	BG505_gp41_9_G	aggaattctacgctgagtGGTTCGGGCGGTGGGGGAAGTGCAGTTGGAATAGGAGCTGTCTTCGGTGGGTTCTTAGGAGCAGCAGGAAGCACTATGGGCGCGGCGTCAATGtgatagcaagcttgcc	2	5	6	0	139	96
161	BG505_gp41_9_E	aggaattctacgctgagtGGTTCGGGCGGTGGGGGAAGTGCAGTTGGAATAGGAGCTGTCTTCGAAGGGTTCTTAGGAGCAGCAGGAAGCACTATGGGCGCGGCGTCAATGtgatagcaagcttgcc	0	1	0	0	16	8
162	BG505_gp41_9_D	aggaattctacgctgagtGGTTCGGGCGGTGGGGGAAGTGCAGTTGGAATAGGAGCTGTCTTCGACGGGTTCTTAGGAGCAGCAGGAAGCACTATGGGCGCGGCGTCAATGtgatagcaagcttgcc	1	0	0	0	6	5
163	BG505_gp41_9_V	aggaattctacgctgagtGGTTCGGGCGGTGGGGGAAGTGCAGTTGGAATAGGAGCTGTCTTCGTTGGGTTCTTAGGAGCAGCAGGAAGCACTATGGGCGCGGCGTCAATGtgatagcaagcttgcc	1	0	13	0	74	62
164	BG505_gp41_9_A	aggaattctacgctgagtGGTTCGGGCGGTGGGGGAAGTGCAGTTGGAATAGGAGCTGTCTTCGCTGGGTTCTTAGGAGCAGCAGGAAGCACTATGGGCGCGGCGTCAATGtgatagcaagcttgcc	0	0	11	0	57	49
165	BG505_gp41_9_R	aggaattctacgctgagtGGTTCGGGCGGTGGGGGAAGTGCAGTTGGAATAGGAGCTGTCTTCCGTGGGTTCTTAGGAGCAGCAGGAAGCACTATGGGCGCGGCGTCAATGtgatagcaagcttgcc	5	2	0	6	66	47
166	BG505_gp41_9_S	aggaattctacgctgagtGGTTCGGGCGGTGGGGGAAGTGCAGTTGGAATAGGAGCTGTCTTCTCTGGGTTCTTAGGAGCAGCAGGAAGCACTATGGGCGCGGCGTCAATGtgatagcaagcttgcc	5	0	0	5	115	91
167	BG505_gp41_9_K	aggaattctacgctgagtGGTTCGGGCGGTGGGGGAAGTGCAGTTGGAATAGGAGCTGTCTTCAAAGGGTTCTTAGGAGCAGCAGGAAGCACTATGGGCGCGGCGTCAATGtgatagcaagcttgcc	0	0	3	34	102	73
168	BG505_gp41_9_N	aggaattctacgctgagtGGTTCGGGCGGTGGGGGAAGTGCAGTTGGAATAGGAGCTGTCTTCAACGGGTTCTTAGGAGCAGCAGGAAGCACTATGGGCGCGGCGTCAATGtgatagcaagcttgcc	1	3	8	4	124	87
169	BG505_gp41_9_M	aggaattctacgctgagtGGTTCGGGCGGTGGGGGAAGTGCAGTTGGAATAGGAGCTGTCTTCATGGGGTTCTTAGGAGCAGCAGGAAGCACTATGGGCGCGGCGTCAATGtgatagcaagcttgcc	0	0	0	8	26	12
170	BG505_gp41_9_I	aggaattctacgctgagtGGTTCGGGCGGTGGGGGAAGTGCAGTTGGAATAGGAGCTGTCTTCATCGGGTTCTTAGGAGCAGCAGGAAGCACTATGGGCGCGGCGTCAATGtgatagcaagcttgcc	0	2	5	21	75	58
171	BG505_gp41_9_T	aggaattctacgctgagtGGTTCGGGCGGTGGGGGAAGTGCAGTTGGAATAGGAGCTGTCTTCACCGGGTTCTTAGGAGCAGCAGGAAGCACTATGGGCGCGGCGTCAATGtgatagcaagcttgcc	0	1	0	0	43	25
172	BG505_gp41_9_W	aggaattctacgctgagtGGTTCGGGCGGTGGGGGAAGTGCAGTTGGAATAGGAGCTGTCTTCTGGGGGTTCTTAGGAGCAGCAGGAAGCACTATGGGCGCGGCGTCAATGtgatagcaagcttgcc	0	1	0	0	22	13
173	BG505_gp41_9_C	aggaattctacgctgagtGGTTCGGGCGGTGGGGGAAGTGCAGTTGGAATAGGAGCTGTCTTCTGCGGGTTCTTAGGAGCAGCAGGAAGCACTATGGGCGCGGCGTCAATGtgatagcaagcttgcc	1	1	15	13	119	118
174	BG505_gp41_9_Y	aggaattctacgctgagtGGTTCGGGCGGTGGGGGAAGTGCAGTTGGAATAGGAGCTGTCTTCTACGGGTTCTTAGGAGCAGCAGGAAGCACTATGGGCGCGGCGTCAATGtgatagcaagcttgcc	2	1	11	0	137	99
175	BG505_gp41_9_L	aggaattctacgctgagtGGTTCGGGCGGTGGGGGAAGTGCAGTTGGAATAGGAGCTGTCTTCCTGGGGTTCTTAGGAGCAGCAGGAAGCACTATGGGCGCGGCGTCAATGtgatagcaagcttgcc	4	1	6	0	147	112
176	BG505_gp41_9_F	aggaattctacgctgagtGGTTCGGGCGGTGGGGGAAGTGCAGTTGGAATAGGAGCTGTCTTCTTCGGGTTCTTAGGAGCAGCAGGAAGCACTATGGGCGCGGCGTCAATGtgatagcaagcttgcc	0	0	0	0	9	8
177	BG505_gp41_9_Q	aggaattctacgctgagtGGTTCGGGCGGTGGGGGAAGTGCAGTTGGAATAGGAGCTGTCTTCCAGGGGTTCTTAGGAGCAGCAGGAAGCACTATGGGCGCGGCGTCAATGtgatagcaagcttgcc	6	2	0	0	129	102
178	BG505_gp41_9_H	aggaattctacgctgagtGGTTCGGGCGGTGGGGGAAGTGCAGTTGGAATAGGAGCTGTCTTCCACGGGTTCTTAGGAGCAGCAGGAAGCACTATGGGCGCGGCGTCAATGtgatagcaagcttgcc	5	5	0	14	186	167
179	BG505_gp41_9_P	aggaattctacgctgagtGGTTCGGGCGGTGGGGGAAGTGCAGTTGGAATAGGAGCTGTCTTCCCGGGGTTCTTAGGAGCAGCAGGAAGCACTATGGGCGCGGCGTCAATGtgatagcaagcttgcc	1	0	1	4	95	66
180	BG505_gp41_10_G	aggaattctacgctgagtTCGGGCGGTGGGGGAAGTGCAGTTGGAATAGGAGCTGTCTTCCTTGGTTTCTTAGGAGCAGCAGGAAGCACTATGGGCGCGGCGTCAATGACGtgatagcaagcttgcc	1	1	0	4	69	45
181	BG505_gp41_10_E	aggaattctacgctgagtTCGGGCGGTGGGGGAAGTGCAGTTGGAATAGGAGCTGTCTTCCTTGAGTTCTTAGGAGCAGCAGGAAGCACTATGGGCGCGGCGTCAATGACGtgatagcaagcttgcc	3	2	0	0	119	66
182	BG505_gp41_10_D	aggaattctacgctgagtTCGGGCGGTGGGGGAAGTGCAGTTGGAATAGGAGCTGTCTTCCTTGACTTCTTAGGAGCAGCAGGAAGCACTATGGGCGCGGCGTCAATGACGtgatagcaagcttgcc	0	0	0	0	150	103
183	BG505_gp41_10_V	aggaattctacgctgagtTCGGGCGGTGGGGGAAGTGCAGTTGGAATAGGAGCTGTCTTCCTTGTTTTCTTAGGAGCAGCAGGAAGCACTATGGGCGCGGCGTCAATGACGtgatagcaagcttgcc	0	0	0	0	5	4
184	BG505_gp41_10_A	aggaattctacgctgagtTCGGGCGGTGGGGGAAGTGCAGTTGGAATAGGAGCTGTCTTCCTTGCTTTCTTAGGAGCAGCAGGAAGCACTATGGGCGCGGCGTCAATGACGtgatagcaagcttgcc	1	0	12	0	34	25
185	BG505_gp41_10_R	aggaattctacgctgagtTCGGGCGGTGGGGGAAGTGCAGTTGGAATAGGAGCTGTCTTCCTTCGTTTCTTAGGAGCAGCAGGAAGCACTATGGGCGCGGCGTCAATGACGtgatagcaagcttgcc	0	1	22	0	88	73
186	BG505_gp41_10_S	aggaattctacgctgagtTCGGGCGGTGGGGGAAGTGCAGTTGGAATAGGAGCTGTCTTCCTTTCTTTCTTAGGAGCAGCAGGAAGCACTATGGGCGCGGCGTCAATGACGtgatagcaagcttgcc	2	0	5	12	128	106
187	BG505_gp41_10_K	aggaattctacgctgagtTCGGGCGGTGGGGGAAGTGCAGTTGGAATAGGAGCTGTCTTCCTTAAATTCTTAGGAGCAGCAGGAAGCACTATGGGCGCGGCGTCAATGACGtgatagcaagcttgcc	2	3	1	0	119	89
188	BG505_gp41_10_N	aggaattctacgctgagtTCGGGCGGTGGGGGAAGTGCAGTTGGAATAGGAGCTGTCTTCCTTAACTTCTTAGGAGCAGCAGGAAGCACTATGGGCGCGGCGTCAATGACGtgatagcaagcttgcc	4	5	0	1	85	78
189	BG505_gp41_10_M	aggaattctacgctgagtTCGGGCGGTGGGGGAAGTGCAGTTGGAATAGGAGCTGTCTTCCTTATGTTCTTAGGAGCAGCAGGAAGCACTATGGGCGCGGCGTCAATGACGtgatagcaagcttgcc	0	1	0	0	54	28
190	BG505_gp41_10_I	aggaattctacgctgagtTCGGGCGGTGGGGGAAGTGCAGTTGGAATAGGAGCTGTCTTCCTTATCTTCTTAGGAGCAGCAGGAAGCACTATGGGCGCGGCGTCAATGACGtgatagcaagcttgcc	2	1	26	0	113	88
191	BG505_gp41_10_T	aggaattctacgctgagtTCGGGCGGTGGGGGAAGTGCAGTTGGAATAGGAGCTGTCTTCCTTACCTTCTTAGGAGCAGCAGGAAGCACTATGGGCGCGGCGTCAATGACGtgatagcaagcttgcc	4	3	14	13	173	112
192	BG505_gp41_10_W	aggaattctacgctgagtTCGGGCGGTGGGGGAAGTGCAGTTGGAATAGGAGCTGTCTTCCTTTGGTTCTTAGGAGCAGCAGGAAGCACTATGGGCGCGGCGTCAATGACGtgatagcaagcttgcc	5	3	2	1	254	211
193	BG505_gp41_10_C	aggaattctacgctgagtTCGGGCGGTGGGGGAAGTGCAGTTGGAATAGGAGCTGTCTTCCTTTGCTTCTTAGGAGCAGCAGGAAGCACTATGGGCGCGGCGTCAATGACGtgatagcaagcttgcc	6	3	4	33	147	132
194	BG505_gp41_10_Y	aggaattctacgctgagtTCGGGCGGTGGGGGAAGTGCAGTTGGAATAGGAGCTGTCTTCCTTTACTTCTTAGGAGCAGCAGGAAGCACTATGGGCGCGGCGTCAATGACGtgatagcaagcttgcc	1	4	0	0	63	45
195	BG505_gp41_10_L	aggaattctacgctgagtTCGGGCGGTGGGGGAAGTGCAGTTGGAATAGGAGCTGTCTTCCTTCTGTTCTTAGGAGCAGCAGGAAGCACTATGGGCGCGGCGTCAATGACGtgatagcaagcttgcc	0	0	1	0	98	80
196	BG505_gp41_10_F	aggaattctacgctgagtTCGGGCGGTGGGGGAAGTGCAGTTGGAATAGGAGCTGTCTTCCTTTTCTTCTTAGGAGCAGCAGGAAGCACTATGGGCGCGGCGTCAATGACGtgatagcaagcttgcc	0	4	0	0	52	47
197	BG505_gp41_10_Q	aggaattctacgctgagtTCGGGCGGTGGGGGAAGTGCAGTTGGAATAGGAGCTGTCTTCCTTCAGTTCTTAGGAGCAGCAGGAAGCACTATGGGCGCGGCGTCAATGACGtgatagcaagcttgcc	15	11	43	26	820	544
198	BG505_gp41_10_H	aggaattctacgctgagtTCGGGCGGTGGGGGAAGTGCAGTTGGAATAGGAGCTGTCTTCCTTCACTTCTTAGGAGCAGCAGGAAGCACTATGGGCGCGGCGTCAATGACGtgatagcaagcttgcc	1	5	20	2	308	198
199	BG505_gp41_10_P	aggaattctacgctgagtTCGGGCGGTGGGGGAAGTGCAGTTGGAATAGGAGCTGTCTTCCTTCCGTTCTTAGGAGCAGCAGGAAGCACTATGGGCGCGGCGTCAATGACGtgatagcaagcttgcc	0	0	10	3	22	27
200	BG505_gp41_11_G	aggaattctacgctgagtGGCGGTGGGGGAAGTGCAGTTGGAATAGGAGCTGTCTTCCTTGGGGGTTTAGGAGCAGCAGGAAGCACTATGGGCGCGGCGTCAATGACGCTGtgatagcaagcttgcc	4	0	0	10	95	73
201	BG505_gp41_11_E	aggaattctacgctgagtGGCGGTGGGGGAAGTGCAGTTGGAATAGGAGCTGTCTTCCTTGGGGAATTAGGAGCAGCAGGAAGCACTATGGGCGCGGCGTCAATGACGCTGtgatagcaagcttgcc	5	3	28	0	187	121
202	BG505_gp41_11_D	aggaattctacgctgagtGGCGGTGGGGGAAGTGCAGTTGGAATAGGAGCTGTCTTCCTTGGGGACTTAGGAGCAGCAGGAAGCACTATGGGCGCGGCGTCAATGACGCTGtgatagcaagcttgcc	10	3	11	5	376	297
203	BG505_gp41_11_V	aggaattctacgctgagtGGCGGTGGGGGAAGTGCAGTTGGAATAGGAGCTGTCTTCCTTGGGGTTTTAGGAGCAGCAGGAAGCACTATGGGCGCGGCGTCAATGACGCTGtgatagcaagcttgcc	8	5	0	0	227	169
204	BG505_gp41_11_A	aggaattctacgctgagtGGCGGTGGGGGAAGTGCAGTTGGAATAGGAGCTGTCTTCCTTGGGGCTTTAGGAGCAGCAGGAAGCACTATGGGCGCGGCGTCAATGACGCTGtgatagcaagcttgcc	1	2	11	1	165	141
205	BG505_gp41_11_R	aggaattctacgctgagtGGCGGTGGGGGAAGTGCAGTTGGAATAGGAGCTGTCTTCCTTGGGCGTTTAGGAGCAGCAGGAAGCACTATGGGCGCGGCGTCAATGACGCTGtgatagcaagcttgcc	16	8	39	37	475	337
206	BG505_gp41_11_S	aggaattctacgctgagtGGCGGTGGGGGAAGTGCAGTTGGAATAGGAGCTGTCTTCCTTGGGTCTTTAGGAGCAGCAGGAAGCACTATGGGCGCGGCGTCAATGACGCTGtgatagcaagcttgcc	4	4	38	14	425	294
207	BG505_gp41_11_K	aggaattctacgctgagtGGCGGTGGGGGAAGTGCAGTTGGAATAGGAGCTGTCTTCCTTGGGAAATTAGGAGCAGCAGGAAGCACTATGGGCGCGGCGTCAATGACGCTGtgatagcaagcttgcc	4	1	13	14	226	127
208	BG505_gp41_11_N	aggaattctacgctgagtGGCGGTGGGGGAAGTGCAGTTGGAATAGGAGCTGTCTTCCTTGGGAACTTAGGAGCAGCAGGAAGCACTATGGGCGCGGCGTCAATGACGCTGtgatagcaagcttgcc	8	5	44	36	407	310
209	BG505_gp41_11_M	aggaattctacgctgagtGGCGGTGGGGGAAGTGCAGTTGGAATAGGAGCTGTCTTCCTTGGGATGTTAGGAGCAGCAGGAAGCACTATGGGCGCGGCGTCAATGACGCTGtgatagcaagcttgcc	1	3	12	16	168	112
210	BG505_gp41_11_I	aggaattctacgctgagtGGCGGTGGGGGAAGTGCAGTTGGAATAGGAGCTGTCTTCCTTGGGATCTTAGGAGCAGCAGGAAGCACTATGGGCGCGGCGTCAATGACGCTGtgatagcaagcttgcc	19	21	119	123	1241	959
211	BG505_gp41_11_T	aggaattctacgctgagtGGCGGTGGGGGAAGTGCAGTTGGAATAGGAGCTGTCTTCCTTGGGACCTTAGGAGCAGCAGGAAGCACTATGGGCGCGGCGTCAATGACGCTGtgatagcaagcttgcc	21	11	60	36	1179	829
212	BG505_gp41_11_W	aggaattctacgctgagtGGCGGTGGGGGAAGTGCAGTTGGAATAGGAGCTGTCTTCCTTGGGTGGTTAGGAGCAGCAGGAAGCACTATGGGCGCGGCGTCAATGACGCTGtgatagcaagcttgcc	1	0	1	2	121	85
213	BG505_gp41_11_C	aggaattctacgctgagtGGCGGTGGGGGAAGTGCAGTTGGAATAGGAGCTGTCTTCCTTGGGTGCTTAGGAGCAGCAGGAAGCACTATGGGCGCGGCGTCAATGACGCTGtgatagcaagcttgcc	0	5	42	7	177	137
214	BG505_gp41_11_Y	aggaattctacgctgagtGGCGGTGGGGGAAGTGCAGTTGGAATAGGAGCTGTCTTCCTTGGGTACTTAGGAGCAGCAGGAAGCACTATGGGCGCGGCGTCAATGACGCTGtgatagcaagcttgcc	0	0	17	0	69	46
215	BG505_gp41_11_L	aggaattctacgctgagtGGCGGTGGGGGAAGTGCAGTTGGAATAGGAGCTGTCTTCCTTGGGCTGTTAGGAGCAGCAGGAAGCACTATGGGCGCGGCGTCAATGACGCTGtgatagcaagcttgcc	7	6	5	9	309	211
216	BG505_gp41_11_F	aggaattctacgctgagtGGCGGTGGGGGAAGTGCAGTTGGAATAGGAGCTGTCTTCCTTGGGTTCTTAGGAGCAGCAGGAAGCACTATGGGCGCGGCGTCAATGACGCTGtgatagcaagcttgcc	5	5	3	0	226	154
217	BG505_gp41_11_Q	aggaattctacgctgagtGGCGGTGGGGGAAGTGCAGTTGGAATAGGAGCTGTCTTCCTTGGGCAGTTAGGAGCAGCAGGAAGCACTATGGGCGCGGCGTCAATGACGCTGtgatagcaagcttgcc	3	1	0	14	149	103
218	BG505_gp41_11_H	aggaattctacgctgagtGGCGGTGGGGGAAGTGCAGTTGGAATAGGAGCTGTCTTCCTTGGGCACTTAGGAGCAGCAGGAAGCACTATGGGCGCGGCGTCAATGACGCTGtgatagcaagcttgcc	6	13	52	72	467	311
219	BG505_gp41_11_P	aggaattctacgctgagtGGCGGTGGGGGAAGTGCAGTTGGAATAGGAGCTGTCTTCCTTGGGCCGTTAGGAGCAGCAGGAAGCACTATGGGCGCGGCGTCAATGACGCTGtgatagcaagcttgcc	5	8	22	0	143	104
220	BG505_gp41_12_G	aggaattctacgctgagtGGTGGGGGAAGTGCAGTTGGAATAGGAGCTGTCTTCCTTGGGTTCGGTGGAGCAGCAGGAAGCACTATGGGCGCGGCGTCAATGACGCTGACGtgatagcaagcttgcc	0	0	0	0	0	0
221	BG505_gp41_12_E	aggaattctacgctgagtGGTGGGGGAAGTGCAGTTGGAATAGGAGCTGTCTTCCTTGGGTTCGAAGGAGCAGCAGGAAGCACTATGGGCGCGGCGTCAATGACGCTGACGtgatagcaagcttgcc	0	0	0	0	0	0
222	BG505_gp41_12_D	aggaattctacgctgagtGGTGGGGGAAGTGCAGTTGGAATAGGAGCTGTCTTCCTTGGGTTCGACGGAGCAGCAGGAAGCACTATGGGCGCGGCGTCAATGACGCTGACGtgatagcaagcttgcc	0	0	0	0	0	0
223	BG505_gp41_12_V	aggaattctacgctgagtGGTGGGGGAAGTGCAGTTGGAATAGGAGCTGTCTTCCTTGGGTTCGTTGGAGCAGCAGGAAGCACTATGGGCGCGGCGTCAATGACGCTGACGtgatagcaagcttgcc	0	0	0	0	0	0
224	BG505_gp41_12_A	aggaattctacgctgagtGGTGGGGGAAGTGCAGTTGGAATAGGAGCTGTCTTCCTTGGGTTCGCTGGAGCAGCAGGAAGCACTATGGGCGCGGCGTCAATGACGCTGACGtgatagcaagcttgcc	0	0	0	0	0	0
225	BG505_gp41_12_R	aggaattctacgctgagtGGTGGGGGAAGTGCAGTTGGAATAGGAGCTGTCTTCCTTGGGTTCCGTGGAGCAGCAGGAAGCACTATGGGCGCGGCGTCAATGACGCTGACGtgatagcaagcttgcc	0	0	0	0	0	0
226	BG505_gp41_12_S	aggaattctacgctgagtGGTGGGGGAAGTGCAGTTGGAATAGGAGCTGTCTTCCTTGGGTTCTCTGGAGCAGCAGGAAGCACTATGGGCGCGGCGTCAATGACGCTGACGtgatagcaagcttgcc	0	0	0	0	0	0
227	BG505_gp41_12_K	aggaattctacgctgagtGGTGGGGGAAGTGCAGTTGGAATAGGAGCTGTCTTCCTTGGGTTCAAAGGAGCAGCAGGAAGCACTATGGGCGCGGCGTCAATGACGCTGACGtgatagcaagcttgcc	0	0	0	0	0	0
228	BG505_gp41_12_N	aggaattctacgctgagtGGTGGGGGAAGTGCAGTTGGAATAGGAGCTGTCTTCCTTGGGTTCAACGGAGCAGCAGGAAGCACTATGGGCGCGGCGTCAATGACGCTGACGtgatagcaagcttgcc	0	0	0	0	0	0
229	BG505_gp41_12_M	aggaattctacgctgagtGGTGGGGGAAGTGCAGTTGGAATAGGAGCTGTCTTCCTTGGGTTCATGGGAGCAGCAGGAAGCACTATGGGCGCGGCGTCAATGACGCTGACGtgatagcaagcttgcc	0	0	0	0	0	0
230	BG505_gp41_12_I	aggaattctacgctgagtGGTGGGGGAAGTGCAGTTGGAATAGGAGCTGTCTTCCTTGGGTTCATCGGAGCAGCAGGAAGCACTATGGGCGCGGCGTCAATGACGCTGACGtgatagcaagcttgcc	0	0	0	0	0	0
231	BG505_gp41_12_T	aggaattctacgctgagtGGTGGGGGAAGTGCAGTTGGAATAGGAGCTGTCTTCCTTGGGTTCACCGGAGCAGCAGGAAGCACTATGGGCGCGGCGTCAATGACGCTGACGtgatagcaagcttgcc	0	0	0	0	0	0
232	BG505_gp41_12_W	aggaattctacgctgagtGGTGGGGGAAGTGCAGTTGGAATAGGAGCTGTCTTCCTTGGGTTCTGGGGAGCAGCAGGAAGCACTATGGGCGCGGCGTCAATGACGCTGACGtgatagcaagcttgcc	0	0	0	0	0	0
233	BG505_gp41_12_C	aggaattctacgctgagtGGTGGGGGAAGTGCAGTTGGAATAGGAGCTGTCTTCCTTGGGTTCTGCGGAGCAGCAGGAAGCACTATGGGCGCGGCGTCAATGACGCTGACGtgatagcaagcttgcc	0	0	0	0	0	0
234	BG505_gp41_12_Y	aggaattctacgctgagtGGTGGGGGAAGTGCAGTTGGAATAGGAGCTGTCTTCCTTGGGTTCTACGGAGCAGCAGGAAGCACTATGGGCGCGGCGTCAATGACGCTGACGtgatagcaagcttgcc	0	0	0	0	0	0
235	BG505_gp41_12_L	aggaattctacgctgagtGGTGGGGGAAGTGCAGTTGGAATAGGAGCTGTCTTCCTTGGGTTCCTGGGAGCAGCAGGAAGCACTATGGGCGCGGCGTCAATGACGCTGACGtgatagcaagcttgcc	0	0	0	0	0	0
236	BG505_gp41_12_F	aggaattctacgctgagtGGTGGGGGAAGTGCAGTTGGAATAGGAGCTGTCTTCCTTGGGTTCTTCGGAGCAGCAGGAAGCACTATGGGCGCGGCGTCAATGACGCTGACGtgatagcaagcttgcc	0	0	0	0	0	0
237	BG505_gp41_12_Q	aggaattctacgctgagtGGTGGGGGAAGTGCAGTTGGAATAGGAGCTGTCTTCCTTGGGTTCCAGGGAGCAGCAGGAAGCACTATGGGCGCGGCGTCAATGACGCTGACGtgatagcaagcttgcc	0	0	0	0	12	3
238	BG505_gp41_12_H	aggaattctacgctgagtGGTGGGGGAAGTGCAGTTGGAATAGGAGCTGTCTTCCTTGGGTTCCACGGAGCAGCAGGAAGCACTATGGGCGCGGCGTCAATGACGCTGACGtgatagcaagcttgcc	0	0	0	0	3	2
239	BG505_gp41_12_P	aggaattctacgctgagtGGTGGGGGAAGTGCAGTTGGAATAGGAGCTGTCTTCCTTGGGTTCCCGGGAGCAGCAGGAAGCACTATGGGCGCGGCGTCAATGACGCTGACGtgatagcaagcttgcc	0	0	0	0	0	0
240	BG505_gp41_13_G	aggaattctacgctgagtGGGGGAAGTGCAGTTGGAATAGGAGCTGTCTTCCTTGGGTTCTTAGGTGCAGCAGGAAGCACTATGGGCGCGGCGTCAATGACGCTGACGGTAtgatagcaagcttgcc	3	7	69	94	453	334
241	BG505_gp41_13_E	aggaattctacgctgagtGGGGGAAGTGCAGTTGGAATAGGAGCTGTCTTCCTTGGGTTCTTAGAAGCAGCAGGAAGCACTATGGGCGCGGCGTCAATGACGCTGACGGTAtgatagcaagcttgcc	0	5	4	2	120	97
242	BG505_gp41_13_D	aggaattctacgctgagtGGGGGAAGTGCAGTTGGAATAGGAGCTGTCTTCCTTGGGTTCTTAGACGCAGCAGGAAGCACTATGGGCGCGGCGTCAATGACGCTGACGGTAtgatagcaagcttgcc	4	3	2	8	109	112
243	BG505_gp41_13_V	aggaattctacgctgagtGGGGGAAGTGCAGTTGGAATAGGAGCTGTCTTCCTTGGGTTCTTAGTTGCAGCAGGAAGCACTATGGGCGCGGCGTCAATGACGCTGACGGTAtgatagcaagcttgcc	0	0	10	9	63	60
244	BG505_gp41_13_A	aggaattctacgctgagtGGGGGAAGTGCAGTTGGAATAGGAGCTGTCTTCCTTGGGTTCTTAGCTGCAGCAGGAAGCACTATGGGCGCGGCGTCAATGACGCTGACGGTAtgatagcaagcttgcc	1	5	5	0	91	57
245	BG505_gp41_13_R	aggaattctacgctgagtGGGGGAAGTGCAGTTGGAATAGGAGCTGTCTTCCTTGGGTTCTTACGTGCAGCAGGAAGCACTATGGGCGCGGCGTCAATGACGCTGACGGTAtgatagcaagcttgcc	2	0	8	0	92	61
246	BG505_gp41_13_S	aggaattctacgctgagtGGGGGAAGTGCAGTTGGAATAGGAGCTGTCTTCCTTGGGTTCTTATCTGCAGCAGGAAGCACTATGGGCGCGGCGTCAATGACGCTGACGGTAtgatagcaagcttgcc	6	4	6	5	288	201
247	BG505_gp41_13_K	aggaattctacgctgagtGGGGGAAGTGCAGTTGGAATAGGAGCTGTCTTCCTTGGGTTCTTAAAAGCAGCAGGAAGCACTATGGGCGCGGCGTCAATGACGCTGACGGTAtgatagcaagcttgcc	1	1	40	9	109	67
248	BG505_gp41_13_N	aggaattctacgctgagtGGGGGAAGTGCAGTTGGAATAGGAGCTGTCTTCCTTGGGTTCTTAAACGCAGCAGGAAGCACTATGGGCGCGGCGTCAATGACGCTGACGGTAtgatagcaagcttgcc	2	1	0	0	179	127
249	BG505_gp41_13_M	aggaattctacgctgagtGGGGGAAGTGCAGTTGGAATAGGAGCTGTCTTCCTTGGGTTCTTAATGGCAGCAGGAAGCACTATGGGCGCGGCGTCAATGACGCTGACGGTAtgatagcaagcttgcc	1	0	2	9	86	59
250	BG505_gp41_13_I	aggaattctacgctgagtGGGGGAAGTGCAGTTGGAATAGGAGCTGTCTTCCTTGGGTTCTTAATCGCAGCAGGAAGCACTATGGGCGCGGCGTCAATGACGCTGACGGTAtgatagcaagcttgcc	0	0	4	6	256	170
251	BG505_gp41_13_T	aggaattctacgctgagtGGGGGAAGTGCAGTTGGAATAGGAGCTGTCTTCCTTGGGTTCTTAACCGCAGCAGGAAGCACTATGGGCGCGGCGTCAATGACGCTGACGGTAtgatagcaagcttgcc	4	5	9	2	125	116
252	BG505_gp41_13_W	aggaattctacgctgagtGGGGGAAGTGCAGTTGGAATAGGAGCTGTCTTCCTTGGGTTCTTATGGGCAGCAGGAAGCACTATGGGCGCGGCGTCAATGACGCTGACGGTAtgatagcaagcttgcc	14	6	26	0	376	271
253	BG505_gp41_13_C	aggaattctacgctgagtGGGGGAAGTGCAGTTGGAATAGGAGCTGTCTTCCTTGGGTTCTTATGCGCAGCAGGAAGCACTATGGGCGCGGCGTCAATGACGCTGACGGTAtgatagcaagcttgcc	4	10	0	35	69	47
254	BG505_gp41_13_Y	aggaattctacgctgagtGGGGGAAGTGCAGTTGGAATAGGAGCTGTCTTCCTTGGGTTCTTATACGCAGCAGGAAGCACTATGGGCGCGGCGTCAATGACGCTGACGGTAtgatagcaagcttgcc	2	5	0	0	122	71
255	BG505_gp41_13_L	aggaattctacgctgagtGGGGGAAGTGCAGTTGGAATAGGAGCTGTCTTCCTTGGGTTCTTACTGGCAGCAGGAAGCACTATGGGCGCGGCGTCAATGACGCTGACGGTAtgatagcaagcttgcc	4	11	10	1	174	133
256	BG505_gp41_13_F	aggaattctacgctgagtGGGGGAAGTGCAGTTGGAATAGGAGCTGTCTTCCTTGGGTTCTTATTCGCAGCAGGAAGCACTATGGGCGCGGCGTCAATGACGCTGACGGTAtgatagcaagcttgcc	1	1	0	1	54	40
257	BG505_gp41_13_Q	aggaattctacgctgagtGGGGGAAGTGCAGTTGGAATAGGAGCTGTCTTCCTTGGGTTCTTACAGGCAGCAGGAAGCACTATGGGCGCGGCGTCAATGACGCTGACGGTAtgatagcaagcttgcc	0	0	0	0	164	106
258	BG505_gp41_13_H	aggaattctacgctgagtGGGGGAAGTGCAGTTGGAATAGGAGCTGTCTTCCTTGGGTTCTTACACGCAGCAGGAAGCACTATGGGCGCGGCGTCAATGACGCTGACGGTAtgatagcaagcttgcc	0	1	11	0	63	39
259	BG505_gp41_13_P	aggaattctacgctgagtGGGGGAAGTGCAGTTGGAATAGGAGCTGTCTTCCTTGGGTTCTTACCGGCAGCAGGAAGCACTATGGGCGCGGCGTCAATGACGCTGACGGTAtgatagcaagcttgcc	2	0	0	55	215	138
260	BG505_gp41_14_G	aggaattctacgctgagtGGAAGTGCAGTTGGAATAGGAGCTGTCTTCCTTGGGTTCTTAGGAGGTGCAGGAAGCACTATGGGCGCGGCGTCAATGACGCTGACGGTACAGtgatagcaagcttgcc	4	7	30	2	274	199
261	BG505_gp41_14_E	aggaattctacgctgagtGGAAGTGCAGTTGGAATAGGAGCTGTCTTCCTTGGGTTCTTAGGAGAAGCAGGAAGCACTATGGGCGCGGCGTCAATGACGCTGACGGTACAGtgatagcaagcttgcc	6	1	63	2	190	154
262	BG505_gp41_14_D	aggaattctacgctgagtGGAAGTGCAGTTGGAATAGGAGCTGTCTTCCTTGGGTTCTTAGGAGACGCAGGAAGCACTATGGGCGCGGCGTCAATGACGCTGACGGTACAGtgatagcaagcttgcc	2	5	9	0	158	112
263	BG505_gp41_14_V	aggaattctacgctgagtGGAAGTGCAGTTGGAATAGGAGCTGTCTTCCTTGGGTTCTTAGGAGTTGCAGGAAGCACTATGGGCGCGGCGTCAATGACGCTGACGGTACAGtgatagcaagcttgcc	2	2	40	44	108	92
264	BG505_gp41_14_A	aggaattctacgctgagtGGAAGTGCAGTTGGAATAGGAGCTGTCTTCCTTGGGTTCTTAGGAGCTGCAGGAAGCACTATGGGCGCGGCGTCAATGACGCTGACGGTACAGtgatagcaagcttgcc	2	3	39	1	261	173
265	BG505_gp41_14_R	aggaattctacgctgagtGGAAGTGCAGTTGGAATAGGAGCTGTCTTCCTTGGGTTCTTAGGACGTGCAGGAAGCACTATGGGCGCGGCGTCAATGACGCTGACGGTACAGtgatagcaagcttgcc	7	10	12	37	268	204
266	BG505_gp41_14_S	aggaattctacgctgagtGGAAGTGCAGTTGGAATAGGAGCTGTCTTCCTTGGGTTCTTAGGATCTGCAGGAAGCACTATGGGCGCGGCGTCAATGACGCTGACGGTACAGtgatagcaagcttgcc	5	4	6	24	196	159
267	BG505_gp41_14_K	aggaattctacgctgagtGGAAGTGCAGTTGGAATAGGAGCTGTCTTCCTTGGGTTCTTAGGAAAAGCAGGAAGCACTATGGGCGCGGCGTCAATGACGCTGACGGTACAGtgatagcaagcttgcc	4	5	6	23	162	134
268	BG505_gp41_14_N	aggaattctacgctgagtGGAAGTGCAGTTGGAATAGGAGCTGTCTTCCTTGGGTTCTTAGGAAACGCAGGAAGCACTATGGGCGCGGCGTCAATGACGCTGACGGTACAGtgatagcaagcttgcc	8	6	3	8	220	159
269	BG505_gp41_14_M	aggaattctacgctgagtGGAAGTGCAGTTGGAATAGGAGCTGTCTTCCTTGGGTTCTTAGGAATGGCAGGAAGCACTATGGGCGCGGCGTCAATGACGCTGACGGTACAGtgatagcaagcttgcc	7	11	30	16	774	607
270	BG505_gp41_14_I	aggaattctacgctgagtGGAAGTGCAGTTGGAATAGGAGCTGTCTTCCTTGGGTTCTTAGGAATCGCAGGAAGCACTATGGGCGCGGCGTCAATGACGCTGACGGTACAGtgatagcaagcttgcc	2	4	36	28	223	165
271	BG505_gp41_14_T	aggaattctacgctgagtGGAAGTGCAGTTGGAATAGGAGCTGTCTTCCTTGGGTTCTTAGGAACCGCAGGAAGCACTATGGGCGCGGCGTCAATGACGCTGACGGTACAGtgatagcaagcttgcc	0	0	0	16	22	16
272	BG505_gp41_14_W	aggaattctacgctgagtGGAAGTGCAGTTGGAATAGGAGCTGTCTTCCTTGGGTTCTTAGGATGGGCAGGAAGCACTATGGGCGCGGCGTCAATGACGCTGACGGTACAGtgatagcaagcttgcc	3	3	3	26	209	159
273	BG505_gp41_14_C	aggaattctacgctgagtGGAAGTGCAGTTGGAATAGGAGCTGTCTTCCTTGGGTTCTTAGGATGCGCAGGAAGCACTATGGGCGCGGCGTCAATGACGCTGACGGTACAGtgatagcaagcttgcc	9	17	90	60	648	452
274	BG505_gp41_14_Y	aggaattctacgctgagtGGAAGTGCAGTTGGAATAGGAGCTGTCTTCCTTGGGTTCTTAGGATACGCAGGAAGCACTATGGGCGCGGCGTCAATGACGCTGACGGTACAGtgatagcaagcttgcc	9	6	6	14	310	234
275	BG505_gp41_14_L	aggaattctacgctgagtGGAAGTGCAGTTGGAATAGGAGCTGTCTTCCTTGGGTTCTTAGGACTGGCAGGAAGCACTATGGGCGCGGCGTCAATGACGCTGACGGTACAGtgatagcaagcttgcc	3	0	29	2	100	83
276	BG505_gp41_14_F	aggaattctacgctgagtGGAAGTGCAGTTGGAATAGGAGCTGTCTTCCTTGGGTTCTTAGGATTCGCAGGAAGCACTATGGGCGCGGCGTCAATGACGCTGACGGTACAGtgatagcaagcttgcc	3	1	15	0	226	154
277	BG505_gp41_14_Q	aggaattctacgctgagtGGAAGTGCAGTTGGAATAGGAGCTGTCTTCCTTGGGTTCTTAGGACAGGCAGGAAGCACTATGGGCGCGGCGTCAATGACGCTGACGGTACAGtgatagcaagcttgcc	5	2	31	0	201	129
278	BG505_gp41_14_H	aggaattctacgctgagtGGAAGTGCAGTTGGAATAGGAGCTGTCTTCCTTGGGTTCTTAGGACACGCAGGAAGCACTATGGGCGCGGCGTCAATGACGCTGACGGTACAGtgatagcaagcttgcc	1	2	0	5	60	54
279	BG505_gp41_14_P	aggaattctacgctgagtGGAAGTGCAGTTGGAATAGGAGCTGTCTTCCTTGGGTTCTTAGGACCGGCAGGAAGCACTATGGGCGCGGCGTCAATGACGCTGACGGTACAGtgatagcaagcttgcc	4	8	20	21	181	151
280	BG505_gp41_15_G	aggaattctacgctgagtAGTGCAGTTGGAATAGGAGCTGTCTTCCTTGGGTTCTTAGGAGCAGGTGGAAGCACTATGGGCGCGGCGTCAATGACGCTGACGGTACAGGCCtgatagcaagcttgcc	3	1	0	0	136	124
281	BG505_gp41_15_E	aggaattctacgctgagtAGTGCAGTTGGAATAGGAGCTGTCTTCCTTGGGTTCTTAGGAGCAGAAGGAAGCACTATGGGCGCGGCGTCAATGACGCTGACGGTACAGGCCtgatagcaagcttgcc	0	3	1	0	93	85
282	BG505_gp41_15_D	aggaattctacgctgagtAGTGCAGTTGGAATAGGAGCTGTCTTCCTTGGGTTCTTAGGAGCAGACGGAAGCACTATGGGCGCGGCGTCAATGACGCTGACGGTACAGGCCtgatagcaagcttgcc	6	5	1	8	270	185
283	BG505_gp41_15_V	aggaattctacgctgagtAGTGCAGTTGGAATAGGAGCTGTCTTCCTTGGGTTCTTAGGAGCAGTTGGAAGCACTATGGGCGCGGCGTCAATGACGCTGACGGTACAGGCCtgatagcaagcttgcc	3	7	19	0	312	270
284	BG505_gp41_15_A	aggaattctacgctgagtAGTGCAGTTGGAATAGGAGCTGTCTTCCTTGGGTTCTTAGGAGCAGCTGGAAGCACTATGGGCGCGGCGTCAATGACGCTGACGGTACAGGCCtgatagcaagcttgcc	19	24	45	34	499	356
285	BG505_gp41_15_R	aggaattctacgctgagtAGTGCAGTTGGAATAGGAGCTGTCTTCCTTGGGTTCTTAGGAGCACGTGGAAGCACTATGGGCGCGGCGTCAATGACGCTGACGGTACAGGCCtgatagcaagcttgcc	1	3	0	0	50	39
286	BG505_gp41_15_S	aggaattctacgctgagtAGTGCAGTTGGAATAGGAGCTGTCTTCCTTGGGTTCTTAGGAGCATCTGGAAGCACTATGGGCGCGGCGTCAATGACGCTGACGGTACAGGCCtgatagcaagcttgcc	7	2	8	5	209	154
287	BG505_gp41_15_K	aggaattctacgctgagtAGTGCAGTTGGAATAGGAGCTGTCTTCCTTGGGTTCTTAGGAGCAAAAGGAAGCACTATGGGCGCGGCGTCAATGACGCTGACGGTACAGGCCtgatagcaagcttgcc	1	7	10	20	190	136
288	BG505_gp41_15_N	aggaattctacgctgagtAGTGCAGTTGGAATAGGAGCTGTCTTCCTTGGGTTCTTAGGAGCAAACGGAAGCACTATGGGCGCGGCGTCAATGACGCTGACGGTACAGGCCtgatagcaagcttgcc	2	5	11	22	194	131
289	BG505_gp41_15_M	aggaattctacgctgagtAGTGCAGTTGGAATAGGAGCTGTCTTCCTTGGGTTCTTAGGAGCAATGGGAAGCACTATGGGCGCGGCGTCAATGACGCTGACGGTACAGGCCtgatagcaagcttgcc	0	4	1	20	86	89
290	BG505_gp41_15_I	aggaattctacgctgagtAGTGCAGTTGGAATAGGAGCTGTCTTCCTTGGGTTCTTAGGAGCAATCGGAAGCACTATGGGCGCGGCGTCAATGACGCTGACGGTACAGGCCtgatagcaagcttgcc	4	5	33	0	166	140
291	BG505_gp41_15_T	aggaattctacgctgagtAGTGCAGTTGGAATAGGAGCTGTCTTCCTTGGGTTCTTAGGAGCAACCGGAAGCACTATGGGCGCGGCGTCAATGACGCTGACGGTACAGGCCtgatagcaagcttgcc	4	6	21	53	312	233
292	BG505_gp41_15_W	aggaattctacgctgagtAGTGCAGTTGGAATAGGAGCTGTCTTCCTTGGGTTCTTAGGAGCATGGGGAAGCACTATGGGCGCGGCGTCAATGACGCTGACGGTACAGGCCtgatagcaagcttgcc	1	4	6	37	158	115
293	BG505_gp41_15_C	aggaattctacgctgagtAGTGCAGTTGGAATAGGAGCTGTCTTCCTTGGGTTCTTAGGAGCATGCGGAAGCACTATGGGCGCGGCGTCAATGACGCTGACGGTACAGGCCtgatagcaagcttgcc	0	3	24	18	145	108
294	BG505_gp41_15_Y	aggaattctacgctgagtAGTGCAGTTGGAATAGGAGCTGTCTTCCTTGGGTTCTTAGGAGCATACGGAAGCACTATGGGCGCGGCGTCAATGACGCTGACGGTACAGGCCtgatagcaagcttgcc	10	11	8	3	398	278
295	BG505_gp41_15_L	aggaattctacgctgagtAGTGCAGTTGGAATAGGAGCTGTCTTCCTTGGGTTCTTAGGAGCACTGGGAAGCACTATGGGCGCGGCGTCAATGACGCTGACGGTACAGGCCtgatagcaagcttgcc	1	3	15	0	142	103
296	BG505_gp41_15_F	aggaattctacgctgagtAGTGCAGTTGGAATAGGAGCTGTCTTCCTTGGGTTCTTAGGAGCATTCGGAAGCACTATGGGCGCGGCGTCAATGACGCTGACGGTACAGGCCtgatagcaagcttgcc	1	1	0	0	87	63
297	BG505_gp41_15_Q	aggaattctacgctgagtAGTGCAGTTGGAATAGGAGCTGTCTTCCTTGGGTTCTTAGGAGCACAGGGAAGCACTATGGGCGCGGCGTCAATGACGCTGACGGTACAGGCCtgatagcaagcttgcc	1	0	0	0	41	29
298	BG505_gp41_15_H	aggaattctacgctgagtAGTGCAGTTGGAATAGGAGCTGTCTTCCTTGGGTTCTTAGGAGCACACGGAAGCACTATGGGCGCGGCGTCAATGACGCTGACGGTACAGGCCtgatagcaagcttgcc	2	4	14	0	90	71
299	BG505_gp41_15_P	aggaattctacgctgagtAGTGCAGTTGGAATAGGAGCTGTCTTCCTTGGGTTCTTAGGAGCACCGGGAAGCACTATGGGCGCGGCGTCAATGACGCTGACGGTACAGGCCtgatagcaagcttgcc	0	0	8	0	84	68
300	BG505_gp41_16_G	aggaattctacgctgagtGCAGTTGGAATAGGAGCTGTCTTCCTTGGGTTCTTAGGAGCAGCAGGTAGCACTATGGGCGCGGCGTCAATGACGCTGACGGTACAGGCCAGAtgatagcaagcttgcc	2	2	0	0	22	6
301	BG505_gp41_16_E	aggaattctacgctgagtGCAGTTGGAATAGGAGCTGTCTTCCTTGGGTTCTTAGGAGCAGCAGAAAGCACTATGGGCGCGGCGTCAATGACGCTGACGGTACAGGCCAGAtgatagcaagcttgcc	5	4	51	4	564	437
302	BG505_gp41_16_D	aggaattctacgctgagtGCAGTTGGAATAGGAGCTGTCTTCCTTGGGTTCTTAGGAGCAGCAGACAGCACTATGGGCGCGGCGTCAATGACGCTGACGGTACAGGCCAGAtgatagcaagcttgcc	2	0	7	22	147	101
303	BG505_gp41_16_V	aggaattctacgctgagtGCAGTTGGAATAGGAGCTGTCTTCCTTGGGTTCTTAGGAGCAGCAGTTAGCACTATGGGCGCGGCGTCAATGACGCTGACGGTACAGGCCAGAtgatagcaagcttgcc	12	4	36	31	729	545
304	BG505_gp41_16_A	aggaattctacgctgagtGCAGTTGGAATAGGAGCTGTCTTCCTTGGGTTCTTAGGAGCAGCAGCTAGCACTATGGGCGCGGCGTCAATGACGCTGACGGTACAGGCCAGAtgatagcaagcttgcc	4	6	26	27	242	187
305	BG505_gp41_16_R	aggaattctacgctgagtGCAGTTGGAATAGGAGCTGTCTTCCTTGGGTTCTTAGGAGCAGCACGTAGCACTATGGGCGCGGCGTCAATGACGCTGACGGTACAGGCCAGAtgatagcaagcttgcc	13	19	72	115	842	560
306	BG505_gp41_16_S	aggaattctacgctgagtGCAGTTGGAATAGGAGCTGTCTTCCTTGGGTTCTTAGGAGCAGCATCTAGCACTATGGGCGCGGCGTCAATGACGCTGACGGTACAGGCCAGAtgatagcaagcttgcc	9	5	43	36	377	250
307	BG505_gp41_16_K	aggaattctacgctgagtGCAGTTGGAATAGGAGCTGTCTTCCTTGGGTTCTTAGGAGCAGCAAAAAGCACTATGGGCGCGGCGTCAATGACGCTGACGGTACAGGCCAGAtgatagcaagcttgcc	7	7	34	0	221	164
308	BG505_gp41_16_N	aggaattctacgctgagtGCAGTTGGAATAGGAGCTGTCTTCCTTGGGTTCTTAGGAGCAGCAAACAGCACTATGGGCGCGGCGTCAATGACGCTGACGGTACAGGCCAGAtgatagcaagcttgcc	3	9	2	0	367	222
309	BG505_gp41_16_M	aggaattctacgctgagtGCAGTTGGAATAGGAGCTGTCTTCCTTGGGTTCTTAGGAGCAGCAATGAGCACTATGGGCGCGGCGTCAATGACGCTGACGGTACAGGCCAGAtgatagcaagcttgcc	1	3	6	0	46	34
310	BG505_gp41_16_I	aggaattctacgctgagtGCAGTTGGAATAGGAGCTGTCTTCCTTGGGTTCTTAGGAGCAGCAATCAGCACTATGGGCGCGGCGTCAATGACGCTGACGGTACAGGCCAGAtgatagcaagcttgcc	4	2	0	0	130	62
311	BG505_gp41_16_T	aggaattctacgctgagtGCAGTTGGAATAGGAGCTGTCTTCCTTGGGTTCTTAGGAGCAGCAACCAGCACTATGGGCGCGGCGTCAATGACGCTGACGGTACAGGCCAGAtgatagcaagcttgcc	5	4	1	2	289	202
312	BG505_gp41_16_W	aggaattctacgctgagtGCAGTTGGAATAGGAGCTGTCTTCCTTGGGTTCTTAGGAGCAGCATGGAGCACTATGGGCGCGGCGTCAATGACGCTGACGGTACAGGCCAGAtgatagcaagcttgcc	5	3	6	13	207	120
313	BG505_gp41_16_C	aggaattctacgctgagtGCAGTTGGAATAGGAGCTGTCTTCCTTGGGTTCTTAGGAGCAGCATGCAGCACTATGGGCGCGGCGTCAATGACGCTGACGGTACAGGCCAGAtgatagcaagcttgcc	3	2	2	3	117	64
314	BG505_gp41_16_Y	aggaattctacgctgagtGCAGTTGGAATAGGAGCTGTCTTCCTTGGGTTCTTAGGAGCAGCATACAGCACTATGGGCGCGGCGTCAATGACGCTGACGGTACAGGCCAGAtgatagcaagcttgcc	10	5	38	9	637	417
315	BG505_gp41_16_L	aggaattctacgctgagtGCAGTTGGAATAGGAGCTGTCTTCCTTGGGTTCTTAGGAGCAGCACTGAGCACTATGGGCGCGGCGTCAATGACGCTGACGGTACAGGCCAGAtgatagcaagcttgcc	3	0	46	10	142	94
316	BG505_gp41_16_F	aggaattctacgctgagtGCAGTTGGAATAGGAGCTGTCTTCCTTGGGTTCTTAGGAGCAGCATTCAGCACTATGGGCGCGGCGTCAATGACGCTGACGGTACAGGCCAGAtgatagcaagcttgcc	6	5	13	75	240	165
317	BG505_gp41_16_Q	aggaattctacgctgagtGCAGTTGGAATAGGAGCTGTCTTCCTTGGGTTCTTAGGAGCAGCACAGAGCACTATGGGCGCGGCGTCAATGACGCTGACGGTACAGGCCAGAtgatagcaagcttgcc	3	5	44	5	246	204
318	BG505_gp41_16_H	aggaattctacgctgagtGCAGTTGGAATAGGAGCTGTCTTCCTTGGGTTCTTAGGAGCAGCACACAGCACTATGGGCGCGGCGTCAATGACGCTGACGGTACAGGCCAGAtgatagcaagcttgcc	6	5	8	0	263	194
319	BG505_gp41_16_P	aggaattctacgctgagtGCAGTTGGAATAGGAGCTGTCTTCCTTGGGTTCTTAGGAGCAGCACCGAGCACTATGGGCGCGGCGTCAATGACGCTGACGGTACAGGCCAGAtgatagcaagcttgcc	23	25	44	20	1303	1005
320	BG505_gp41_17_G	aggaattctacgctgagtGTTGGAATAGGAGCTGTCTTCCTTGGGTTCTTAGGAGCAGCAGGAGGTACTATGGGCGCGGCGTCAATGACGCTGACGGTACAGGCCAGAAATtgatagcaagcttgcc	0	0	0	0	19	14
321	BG505_gp41_17_E	aggaattctacgctgagtGTTGGAATAGGAGCTGTCTTCCTTGGGTTCTTAGGAGCAGCAGGAGAAACTATGGGCGCGGCGTCAATGACGCTGACGGTACAGGCCAGAAATtgatagcaagcttgcc	0	1	0	0	5	6
322	BG505_gp41_17_D	aggaattctacgctgagtGTTGGAATAGGAGCTGTCTTCCTTGGGTTCTTAGGAGCAGCAGGAGACACTATGGGCGCGGCGTCAATGACGCTGACGGTACAGGCCAGAAATtgatagcaagcttgcc	0	0	0	0	5	8
323	BG505_gp41_17_V	aggaattctacgctgagtGTTGGAATAGGAGCTGTCTTCCTTGGGTTCTTAGGAGCAGCAGGAGTTACTATGGGCGCGGCGTCAATGACGCTGACGGTACAGGCCAGAAATtgatagcaagcttgcc	0	0	9	0	30	31
324	BG505_gp41_17_A	aggaattctacgctgagtGTTGGAATAGGAGCTGTCTTCCTTGGGTTCTTAGGAGCAGCAGGAGCTACTATGGGCGCGGCGTCAATGACGCTGACGGTACAGGCCAGAAATtgatagcaagcttgcc	0	0	0	0	10	9
325	BG505_gp41_17_R	aggaattctacgctgagtGTTGGAATAGGAGCTGTCTTCCTTGGGTTCTTAGGAGCAGCAGGACGTACTATGGGCGCGGCGTCAATGACGCTGACGGTACAGGCCAGAAATtgatagcaagcttgcc	0	3	0	0	40	33
326	BG505_gp41_17_S	aggaattctacgctgagtGTTGGAATAGGAGCTGTCTTCCTTGGGTTCTTAGGAGCAGCAGGATCTACTATGGGCGCGGCGTCAATGACGCTGACGGTACAGGCCAGAAATtgatagcaagcttgcc	0	0	0	0	6	6
327	BG505_gp41_17_K	aggaattctacgctgagtGTTGGAATAGGAGCTGTCTTCCTTGGGTTCTTAGGAGCAGCAGGAAAAACTATGGGCGCGGCGTCAATGACGCTGACGGTACAGGCCAGAAATtgatagcaagcttgcc	0	0	0	0	8	8
328	BG505_gp41_17_N	aggaattctacgctgagtGTTGGAATAGGAGCTGTCTTCCTTGGGTTCTTAGGAGCAGCAGGAAACACTATGGGCGCGGCGTCAATGACGCTGACGGTACAGGCCAGAAATtgatagcaagcttgcc	0	1	0	0	14	12
329	BG505_gp41_17_M	aggaattctacgctgagtGTTGGAATAGGAGCTGTCTTCCTTGGGTTCTTAGGAGCAGCAGGAATGACTATGGGCGCGGCGTCAATGACGCTGACGGTACAGGCCAGAAATtgatagcaagcttgcc	0	0	0	0	0	0
330	BG505_gp41_17_I	aggaattctacgctgagtGTTGGAATAGGAGCTGTCTTCCTTGGGTTCTTAGGAGCAGCAGGAATCACTATGGGCGCGGCGTCAATGACGCTGACGGTACAGGCCAGAAATtgatagcaagcttgcc	0	0	0	0	7	7
331	BG505_gp41_17_T	aggaattctacgctgagtGTTGGAATAGGAGCTGTCTTCCTTGGGTTCTTAGGAGCAGCAGGAACCACTATGGGCGCGGCGTCAATGACGCTGACGGTACAGGCCAGAAATtgatagcaagcttgcc	0	0	0	0	5	5
332	BG505_gp41_17_W	aggaattctacgctgagtGTTGGAATAGGAGCTGTCTTCCTTGGGTTCTTAGGAGCAGCAGGATGGACTATGGGCGCGGCGTCAATGACGCTGACGGTACAGGCCAGAAATtgatagcaagcttgcc	2	2	0	0	44	44
333	BG505_gp41_17_C	aggaattctacgctgagtGTTGGAATAGGAGCTGTCTTCCTTGGGTTCTTAGGAGCAGCAGGATGCACTATGGGCGCGGCGTCAATGACGCTGACGGTACAGGCCAGAAATtgatagcaagcttgcc	0	0	10	0	6	7
334	BG505_gp41_17_Y	aggaattctacgctgagtGTTGGAATAGGAGCTGTCTTCCTTGGGTTCTTAGGAGCAGCAGGATACACTATGGGCGCGGCGTCAATGACGCTGACGGTACAGGCCAGAAATtgatagcaagcttgcc	0	0	3	0	12	13
335	BG505_gp41_17_L	aggaattctacgctgagtGTTGGAATAGGAGCTGTCTTCCTTGGGTTCTTAGGAGCAGCAGGACTGACTATGGGCGCGGCGTCAATGACGCTGACGGTACAGGCCAGAAATtgatagcaagcttgcc	0	0	0	0	23	22
336	BG505_gp41_17_F	aggaattctacgctgagtGTTGGAATAGGAGCTGTCTTCCTTGGGTTCTTAGGAGCAGCAGGATTCACTATGGGCGCGGCGTCAATGACGCTGACGGTACAGGCCAGAAATtgatagcaagcttgcc	0	0	0	0	18	9
337	BG505_gp41_17_Q	aggaattctacgctgagtGTTGGAATAGGAGCTGTCTTCCTTGGGTTCTTAGGAGCAGCAGGACAGACTATGGGCGCGGCGTCAATGACGCTGACGGTACAGGCCAGAAATtgatagcaagcttgcc	0	0	0	0	0	0
338	BG505_gp41_17_H	aggaattctacgctgagtGTTGGAATAGGAGCTGTCTTCCTTGGGTTCTTAGGAGCAGCAGGACACACTATGGGCGCGGCGTCAATGACGCTGACGGTACAGGCCAGAAATtgatagcaagcttgcc	0	0	0	0	2	3
339	BG505_gp41_17_P	aggaattctacgctgagtGTTGGAATAGGAGCTGTCTTCCTTGGGTTCTTAGGAGCAGCAGGACCGACTATGGGCGCGGCGTCAATGACGCTGACGGTACAGGCCAGAAATtgatagcaagcttgcc	0	0	0	0	13	5
340	BG505_gp41_18_G	aggaattctacgctgagtGGAATAGGAGCTGTCTTCCTTGGGTTCTTAGGAGCAGCAGGAAGCGGTATGGGCGCGGCGTCAATGACGCTGACGGTACAGGCCAGAAATTTAtgatagcaagcttgcc	0	1	0	0	14	11
341	BG505_gp41_18_E	aggaattctacgctgagtGGAATAGGAGCTGTCTTCCTTGGGTTCTTAGGAGCAGCAGGAAGCGAAATGGGCGCGGCGTCAATGACGCTGACGGTACAGGCCAGAAATTTAtgatagcaagcttgcc	0	1	0	0	23	14
342	BG505_gp41_18_D	aggaattctacgctgagtGGAATAGGAGCTGTCTTCCTTGGGTTCTTAGGAGCAGCAGGAAGCGACATGGGCGCGGCGTCAATGACGCTGACGGTACAGGCCAGAAATTTAtgatagcaagcttgcc	2	0	5	0	66	41
343	BG505_gp41_18_V	aggaattctacgctgagtGGAATAGGAGCTGTCTTCCTTGGGTTCTTAGGAGCAGCAGGAAGCGTTATGGGCGCGGCGTCAATGACGCTGACGGTACAGGCCAGAAATTTAtgatagcaagcttgcc	1	1	0	2	57	58
344	BG505_gp41_18_A	aggaattctacgctgagtGGAATAGGAGCTGTCTTCCTTGGGTTCTTAGGAGCAGCAGGAAGCGCTATGGGCGCGGCGTCAATGACGCTGACGGTACAGGCCAGAAATTTAtgatagcaagcttgcc	1	1	0	0	41	32
345	BG505_gp41_18_R	aggaattctacgctgagtGGAATAGGAGCTGTCTTCCTTGGGTTCTTAGGAGCAGCAGGAAGCCGTATGGGCGCGGCGTCAATGACGCTGACGGTACAGGCCAGAAATTTAtgatagcaagcttgcc	1	7	6	0	127	89
346	BG505_gp41_18_S	aggaattctacgctgagtGGAATAGGAGCTGTCTTCCTTGGGTTCTTAGGAGCAGCAGGAAGCTCTATGGGCGCGGCGTCAATGACGCTGACGGTACAGGCCAGAAATTTAtgatagcaagcttgcc	2	2	1	0	57	49
347	BG505_gp41_18_K	aggaattctacgctgagtGGAATAGGAGCTGTCTTCCTTGGGTTCTTAGGAGCAGCAGGAAGCAAAATGGGCGCGGCGTCAATGACGCTGACGGTACAGGCCAGAAATTTAtgatagcaagcttgcc	0	1	0	0	33	29
348	BG505_gp41_18_N	aggaattctacgctgagtGGAATAGGAGCTGTCTTCCTTGGGTTCTTAGGAGCAGCAGGAAGCAACATGGGCGCGGCGTCAATGACGCTGACGGTACAGGCCAGAAATTTAtgatagcaagcttgcc	1	1	0	0	62	41
349	BG505_gp41_18_M	aggaattctacgctgagtGGAATAGGAGCTGTCTTCCTTGGGTTCTTAGGAGCAGCAGGAAGCATGATGGGCGCGGCGTCAATGACGCTGACGGTACAGGCCAGAAATTTAtgatagcaagcttgcc	0	0	3	0	28	22
350	BG505_gp41_18_I	aggaattctacgctgagtGGAATAGGAGCTGTCTTCCTTGGGTTCTTAGGAGCAGCAGGAAGCATCATGGGCGCGGCGTCAATGACGCTGACGGTACAGGCCAGAAATTTAtgatagcaagcttgcc	0	1	0	0	64	41
351	BG505_gp41_18_T	aggaattctacgctgagtGGAATAGGAGCTGTCTTCCTTGGGTTCTTAGGAGCAGCAGGAAGCACCATGGGCGCGGCGTCAATGACGCTGACGGTACAGGCCAGAAATTTAtgatagcaagcttgcc	0	0	7	12	100	82
352	BG505_gp41_18_W	aggaattctacgctgagtGGAATAGGAGCTGTCTTCCTTGGGTTCTTAGGAGCAGCAGGAAGCTGGATGGGCGCGGCGTCAATGACGCTGACGGTACAGGCCAGAAATTTAtgatagcaagcttgcc	0	2	0	0	22	20
353	BG505_gp41_18_C	aggaattctacgctgagtGGAATAGGAGCTGTCTTCCTTGGGTTCTTAGGAGCAGCAGGAAGCTGCATGGGCGCGGCGTCAATGACGCTGACGGTACAGGCCAGAAATTTAtgatagcaagcttgcc	2	0	0	0	32	20
354	BG505_gp41_18_Y	aggaattctacgctgagtGGAATAGGAGCTGTCTTCCTTGGGTTCTTAGGAGCAGCAGGAAGCTACATGGGCGCGGCGTCAATGACGCTGACGGTACAGGCCAGAAATTTAtgatagcaagcttgcc	0	1	5	11	24	18
355	BG505_gp41_18_L	aggaattctacgctgagtGGAATAGGAGCTGTCTTCCTTGGGTTCTTAGGAGCAGCAGGAAGCCTGATGGGCGCGGCGTCAATGACGCTGACGGTACAGGCCAGAAATTTAtgatagcaagcttgcc	0	0	0	1	17	14
356	BG505_gp41_18_F	aggaattctacgctgagtGGAATAGGAGCTGTCTTCCTTGGGTTCTTAGGAGCAGCAGGTAGCTTCATGGGCGCGGCGTCAATGACGCTGACGGTACAGGCCAGAAATTTAtgatagcaagcttgcc	0	0	0	0	5	6
357	BG505_gp41_18_Q	aggaattctacgctgagtGGAATAGGAGCTGTCTTCCTTGGGTTCTTAGGAGCAGCAGGAAGCCAGATGGGCGCGGCGTCAATGACGCTGACGGTACAGGCCAGAAATTTAtgatagcaagcttgcc	0	1	14	0	48	31
358	BG505_gp41_18_H	aggaattctacgctgagtGGAATAGGAGCTGTCTTCCTTGGGTTCTTAGGAGCAGCAGGAAGCCACATGGGCGCGGCGTCAATGACGCTGACGGTACAGGCCAGAAATTTAtgatagcaagcttgcc	2	2	0	0	38	26
359	BG505_gp41_18_P	aggaattctacgctgagtGGAATAGGAGCTGTCTTCCTTGGGTTCTTAGGAGCAGCAGGAAGCCCGATGGGCGCGGCGTCAATGACGCTGACGGTACAGGCCAGAAATTTAtgatagcaagcttgcc	0	0	0	0	58	36
360	BG505_gp41_19_G	aggaattctacgctgagtATAGGAGCTGTCTTCCTTGGGTTCTTAGGAGCAGCAGGAAGCACTGGTGGCGCGGCGTCAATGACGCTGACGGTACAGGCCAGAAATTTATTAtgatagcaagcttgcc	1	1	0	0	5	2
361	BG505_gp41_19_E	aggaattctacgctgagtATAGGAGCTGTCTTCCTTGGGTTCTTAGGAGCAGCAGGAAGCACTGAAGGCGCGGCGTCAATGACGCTGACGGTACAGGCCAGAAATTTATTAtgatagcaagcttgcc	3	2	0	0	42	25
362	BG505_gp41_19_D	aggaattctacgctgagtATAGGAGCTGTCTTCCTTGGGTTCTTAGGAGCAGCAGGAAGCACTGACGGCGCGGCGTCAATGACGCTGACGGTACAGGCCAGAAATTTATTAtgatagcaagcttgcc	1	0	0	0	15	1
363	BG505_gp41_19_V	aggaattctacgctgagtATAGGAGCTGTCTTCCTTGGGTTCTTAGGAGCAGCAGGAAGCACTGTTGGCGCGGCGTCAATGACGCTGACGGTACAGGCCAGAAATTTATTAtgatagcaagcttgcc	0	0	0	0	11	7
364	BG505_gp41_19_A	aggaattctacgctgagtATAGGAGCTGTCTTCCTTGGGTTCTTAGGAGCAGCAGGAAGCACTGCTGGCGCGGCGTCAATGACGCTGACGGTACAGGCCAGAAATTTATTAtgatagcaagcttgcc	0	0	0	0	4	3
365	BG505_gp41_19_R	aggaattctacgctgagtATAGGAGCTGTCTTCCTTGGGTTCTTAGGAGCAGCAGGAAGCACTCGTGGCGCGGCGTCAATGACGCTGACGGTACAGGCCAGAAATTTATTAtgatagcaagcttgcc	0	0	0	0	6	8
366	BG505_gp41_19_S	aggaattctacgctgagtATAGGAGCTGTCTTCCTTGGGTTCTTAGGAGCAGCAGGAAGCACTTCTGGCGCGGCGTCAATGACGCTGACGGTACAGGCCAGAAATTTATTAtgatagcaagcttgcc	3	0	3	2	20	22
367	BG505_gp41_19_K	aggaattctacgctgagtATAGGAGCTGTCTTCCTTGGGTTCTTAGGAGCAGCAGGAAGCACTAAAGGCGCGGCGTCAATGACGCTGACGGTACAGGCCAGAAATTTATTAtgatagcaagcttgcc	2	0	0	0	34	11
368	BG505_gp41_19_N	aggaattctacgctgagtATAGGAGCTGTCTTCCTTGGGTTCTTAGGAGCAGCAGGAAGCACTAACGGCGCGGCGTCAATGACGCTGACGGTACAGGCCAGAAATTTATTAtgatagcaagcttgcc	0	0	1	0	29	23
369	BG505_gp41_19_M	aggaattctacgctgagtATAGGAGCTGTCTTCCTTGGGTTCTTAGGAGCAGCAGGAAGCACTATGGGCGCGGCGTCAATGACGCTGACGGTACAGGCCAGAAATTTATTAtgatagcaagcttgcc	0	0	0	0	2	1
370	BG505_gp41_19_I	aggaattctacgctgagtATAGGAGCTGTCTTCCTTGGGTTCTTAGGAGCAGCAGGAAGCACTATCGGCGCGGCGTCAATGACGCTGACGGTACAGGCCAGAAATTTATTAtgatagcaagcttgcc	0	0	0	0	10	8
371	BG505_gp41_19_T	aggaattctacgctgagtATAGGAGCTGTCTTCCTTGGGTTCTTAGGAGCAGCAGGAAGCACTACCGGCGCGGCGTCAATGACGCTGACGGTACAGGCCAGAAATTTATTAtgatagcaagcttgcc	1	0	0	0	3	4
372	BG505_gp41_19_W	aggaattctacgctgagtATAGGAGCTGTCTTCCTTGGGTTCTTAGGAGCAGCAGGAAGCACTTGGGGCGCGGCGTCAATGACGCTGACGGTACAGGCCAGAAATTTATTAtgatagcaagcttgcc	0	0	0	0	1	0
373	BG505_gp41_19_C	aggaattctacgctgagtATAGGAGCTGTCTTCCTTGGGTTCTTAGGAGCAGCAGGAAGCACTTGCGGCGCGGCGTCAATGACGCTGACGGTACAGGCCAGAAATTTATTAtgatagcaagcttgcc	1	0	3	13	9	7
374	BG505_gp41_19_Y	aggaattctacgctgagtATAGGAGCTGTCTTCCTTGGGTTCTTAGGAGCAGCAGGAAGCACTTACGGCGCGGCGTCAATGACGCTGACGGTACAGGCCAGAAATTTATTAtgatagcaagcttgcc	0	1	0	0	8	3
375	BG505_gp41_19_L	aggaattctacgctgagtATAGGAGCTGTCTTCCTTGGGTTCTTAGGAGCAGCAGGAAGCACTCTGGGCGCGGCGTCAATGACGCTGACGGTACAGGCCAGAAATTTATTAtgatagcaagcttgcc	0	0	0	0	1	0
376	BG505_gp41_19_F	aggaattctacgctgagtATAGGAGCTGTCTTCCTTGGGTTCTTAGGAGCAGCAGGAAGCACTTTCGGCGCGGCGTCAATGACGCTGACGGTACAGGCCAGAAATTTATTAtgatagcaagcttgcc	0	0	0	0	2	3
377	BG505_gp41_19_Q	aggaattctacgctgagtATAGGAGCTGTCTTCCTTGGGTTCTTAGGAGCAGCAGGAAGCACTCAGGGCGCGGCGTCAATGACGCTGACGGTACAGGCCAGAAATTTATTAtgatagcaagcttgcc	0	0	0	0	0	0
378	BG505_gp41_19_H	aggaattctacgctgagtATAGGAGCTGTCTTCCTTGGGTTCTTAGGAGCAGCAGGAAGCACTCACGGCGCGGCGTCAATGACGCTGACGGTACAGGCCAGAAATTTATTAtgatagcaagcttgcc	0	1	6	0	28	15
379	BG505_gp41_19_P	aggaattctacgctgagtATAGGAGCTGTCTTCCTTGGGTTCTTAGGAGCAGCAGGAAGCACTCCGGGCGCGGCGTCAATGACGCTGACGGTACAGGCCAGAAATTTATTAtgatagcaagcttgcc	0	0	0	0	4	1
380	BG505_gp41_20_G	aggaattctacgctgagtGGAGCTGTCTTCCTTGGGTTCTTAGGAGCAGCAGGAAGCACTATGGGTGCGGCGTCAATGACGCTGACGGTACAGGCCAGAAATTTATTATCTtgatagcaagcttgcc	0	0	11	1	39	33
381	BG505_gp41_20_E	aggaattctacgctgagtGGAGCTGTCTTCCTTGGGTTCTTAGGAGCAGCAGGAAGCACTATGGAAGCGGCGTCAATGACGCTGACGGTACAGGCCAGAAATTTATTATCTtgatagcaagcttgcc	1	3	1	31	161	137
382	BG505_gp41_20_D	aggaattctacgctgagtGGAGCTGTCTTCCTTGGGTTCTTAGGAGCAGCAGGAAGCACTATGGACGCGGCGTCAATGACGCTGACGGTACAGGCCAGAAATTTATTATCTtgatagcaagcttgcc	4	2	12	0	122	81
383	BG505_gp41_20_V	aggaattctacgctgagtGGAGCTGTCTTCCTTGGGTTCTTAGGAGCAGCAGGAAGCACTATGGTTGCGGCGTCAATGACGCTGACGGTACAGGCCAGAAATTTATTATCTtgatagcaagcttgcc	0	0	0	0	35	21
384	BG505_gp41_20_A	aggaattctacgctgagtGGAGCTGTCTTCCTTGGGTTCTTAGGAGCAGCAGGAAGCACTATGGCTGCGGCGTCAATGACGCTGACGGTACAGGCCAGAAATTTATTATCTtgatagcaagcttgcc	1	0	1	2	72	56
385	BG505_gp41_20_R	aggaattctacgctgagtGGAGCTGTCTTCCTTGGGTTCTTAGGAGCAGCAGGAAGCACTATGCGTGCGGCGTCAATGACGCTGACGGTACAGGCCAGAAATTTATTATCTtgatagcaagcttgcc	0	1	4	0	120	71
386	BG505_gp41_20_S	aggaattctacgctgagtGGAGCTGTCTTCCTTGGGTTCTTAGGAGCAGCAGGAAGCACTATGTCTGCGGCGTCAATGACGCTGACGGTACAGGCCAGAAATTTATTATCTtgatagcaagcttgcc	2	2	9	0	156	87
387	BG505_gp41_20_K	aggaattctacgctgagtGGAGCTGTCTTCCTTGGGTTCTTAGGAGCAGCAGGAAGCACTATGAAAGCGGCGTCAATGACGCTGACGGTACAGGCCAGAAATTTATTATCTtgatagcaagcttgcc	6	7	58	12	383	301
388	BG505_gp41_20_N	aggaattctacgctgagtGGAGCTGTCTTCCTTGGGTTCTTAGGAGCAGCAGGAAGCACTATGAACGCGGCGTCAATGACGCTGACGGTACAGGCCAGAAATTTATTATCTtgatagcaagcttgcc	2	2	15	4	204	145
389	BG505_gp41_20_M	aggaattctacgctgagtGGAGCTGTCTTCCTTGGGTTCTTAGGAGCAGCAGGAAGCACTATGATGGCGGCGTCAATGACGCTGACGGTACAGGCCAGAAATTTATTATCTtgatagcaagcttgcc	2	2	16	4	161	119
390	BG505_gp41_20_I	aggaattctacgctgagtGGAGCTGTCTTCCTTGGGTTCTTAGGAGCAGCAGGAAGCACTATGATCGCGGCGTCAATGACGCTGACGGTACAGGCCAGAAATTTATTATCTtgatagcaagcttgcc	2	0	6	0	100	55
391	BG505_gp41_20_T	aggaattctacgctgagtGGAGCTGTCTTCCTTGGGTTCTTAGGAGCAGCAGGAAGCACTATGACCGCGGCGTCAATGACGCTGACGGTACAGGCCAGAAATTTATTATCTtgatagcaagcttgcc	2	0	2	2	69	38
392	BG505_gp41_20_W	aggaattctacgctgagtGGAGCTGTCTTCCTTGGGTTCTTAGGAGCAGCAGGAAGCACTATGTGGGCGGCGTCAATGACGCTGACGGTACAGGCCAGAAATTTATTATCTtgatagcaagcttgcc	0	0	0	0	20	24
393	BG505_gp41_20_C	aggaattctacgctgagtGGAGCTGTCTTCCTTGGGTTCTTAGGAGCAGCAGGAAGCACTATGTGCGCGGCGTCAATGACGCTGACGGTACAGGCCAGAAATTTATTATCTtgatagcaagcttgcc	1	0	6	0	121	95
394	BG505_gp41_20_Y	aggaattctacgctgagtGGAGCTGTCTTCCTTGGGTTCTTAGGAGCAGCAGGAAGCACTATGTACGCGGCGTCAATGACGCTGACGGTACAGGCCAGAAATTTATTATCTtgatagcaagcttgcc	3	2	0	5	28	25
395	BG505_gp41_20_L	aggaattctacgctgagtGGAGCTGTCTTCCTTGGGTTCTTAGGAGCAGCAGGAAGCACTATGCTGGCGGCGTCAATGACGCTGACGGTACAGGCCAGAAATTTATTATCTtgatagcaagcttgcc	0	0	0	0	45	45
396	BG505_gp41_20_F	aggaattctacgctgagtGGAGCTGTCTTCCTTGGGTTCTTAGGAGCAGCAGGAAGCACTATGTTCGCGGCGTCAATGACGCTGACGGTACAGGCCAGAAATTTATTATCTtgatagcaagcttgcc	0	1	0	1	9	10
397	BG505_gp41_20_Q	aggaattctacgctgagtGGAGCTGTCTTCCTTGGGTTCTTAGGAGCAGCAGGAAGCACTATGCAGGCGGCGTCAATGACGCTGACGGTACAGGCCAGAAATTTATTATCTtgatagcaagcttgcc	1	1	1	0	107	73
398	BG505_gp41_20_H	aggaattctacgctgagtGGAGCTGTCTTCCTTGGGTTCTTAGGAGCAGCAGGAAGCACTATGCACGCGGCGTCAATGACGCTGACGGTACAGGCCAGAAATTTATTATCTtgatagcaagcttgcc	0	0	5	0	61	41
399	BG505_gp41_20_P	aggaattctacgctgagtGGAGCTGTCTTCCTTGGGTTCTTAGGAGCAGCAGGAAGCACTATGCCGGCGGCGTCAATGACGCTGACGGTACAGGCCAGAAATTTATTATCTtgatagcaagcttgcc	2	3	3	0	54	35
400	BG505_gp41_21_G	aggaattctacgctgagtGCTGTCTTCCTTGGGTTCTTAGGAGCAGCAGGAAGCACTATGGGCGGTGCGTCAATGACGCTGACGGTACAGGCCAGAAATTTATTATCTGGCtgatagcaagcttgcc	6	6	5	0	152	114
401	BG505_gp41_21_E	aggaattctacgctgagtGCTGTCTTCCTTGGGTTCTTAGGAGCAGCAGGAAGCACTATGGGCGAAGCGTCAATGACGCTGACGGTACAGGCCAGAAATTTATTATCTGGCtgatagcaagcttgcc	3	2	8	29	225	121
402	BG505_gp41_21_D	aggaattctacgctgagtGCTGTCTTCCTTGGGTTCTTAGGAGCAGCAGGAAGCACTATGGGCGACGCGTCAATGACGCTGACGGTACAGGCCAGAAATTTATTATCTGGCtgatagcaagcttgcc	5	3	1	6	252	168
403	BG505_gp41_21_V	aggaattctacgctgagtGCTGTCTTCCTTGGGTTCTTAGGAGCAGCAGGAAGCACTATGGGCGTTGCGTCAATGACGCTGACGGTACAGGCCAGAAATTTATTATCTGGCtgatagcaagcttgcc	1	1	0	9	93	46
404	BG505_gp41_21_A	aggaattctacgctgagtGCTGTCTTCCTTGGGTTCTTAGGAGCAGCAGGAAGCACTATGGGCGCTGCGTCAATGACGCTGACGGTACAGGCCAGAAATTTATTATCTGGCtgatagcaagcttgcc	0	2	3	1	102	78
405	BG505_gp41_21_R	aggaattctacgctgagtGCTGTCTTCCTTGGGTTCTTAGGAGCAGCAGGAAGCACTATGGGCCGTGCGTCAATGACGCTGACGGTACAGGCCAGAAATTTATTATCTGGCtgatagcaagcttgcc	4	5	20	6	237	133
406	BG505_gp41_21_S	aggaattctacgctgagtGCTGTCTTCCTTGGGTTCTTAGGAGCAGCAGGAAGCACTATGGGCTCTGCGTCAATGACGCTGACGGTACAGGCCAGAAATTTATTATCTGGCtgatagcaagcttgcc	3	3	0	24	211	138
407	BG505_gp41_21_K	aggaattctacgctgagtGCTGTCTTCCTTGGGTTCTTAGGAGCAGCAGGAAGCACTATGGGCAAAGCGTCAATGACGCTGACGGTACAGGCCAGAAATTTATTATCTGGCtgatagcaagcttgcc	6	11	65	58	402	241
408	BG505_gp41_21_N	aggaattctacgctgagtGCTGTCTTCCTTGGGTTCTTAGGAGCAGCAGGAAGCACTATGGGCAACGCGTCAATGACGCTGACGGTACAGGCCAGAAATTTATTATCTGGCtgatagcaagcttgcc	6	0	30	0	173	97
409	BG505_gp41_21_M	aggaattctacgctgagtGCTGTCTTCCTTGGGTTCTTAGGAGCAGCAGGAAGCACTATGGGCATGGCGTCAATGACGCTGACGGTACAGGCCAGAAATTTATTATCTGGCtgatagcaagcttgcc	4	5	46	3	425	280
410	BG505_gp41_21_I	aggaattctacgctgagtGCTGTCTTCCTTGGGTTCTTAGGAGCAGCAGGAAGCACTATGGGCATCGCGTCAATGACGCTGACGGTACAGGCCAGAAATTTATTATCTGGCtgatagcaagcttgcc	0	0	0	0	80	45
411	BG505_gp41_21_T	aggaattctacgctgagtGCTGTCTTCCTTGGGTTCTTAGGAGCAGCAGGAAGCACTATGGGCACCGCGTCAATGACGCTGACGGTACAGGCCAGAAATTTATTATCTGGCtgatagcaagcttgcc	2	0	26	3	76	44
412	BG505_gp41_21_W	aggaattctacgctgagtGCTGTCTTCCTTGGGTTCTTAGGAGCAGCAGGAAGCACTATGGGCTGGGCGTCAATGACGCTGACGGTACAGGCCAGAAATTTATTATCTGGCtgatagcaagcttgcc	0	0	0	0	36	30
413	BG505_gp41_21_C	aggaattctacgctgagtGCTGTCTTCCTTGGGTTCTTAGGAGCAGCAGGAAGCACTATGGGCTGCGCGTCAATGACGCTGACGGTACAGGCCAGAAATTTATTATCTGGCtgatagcaagcttgcc	1	3	7	0	42	20
414	BG505_gp41_21_Y	aggaattctacgctgagtGCTGTCTTCCTTGGGTTCTTAGGAGCAGCAGGAAGCACTATGGGCTACGCGTCAATGACGCTGACGGTACAGGCCAGAAATTTATTATCTGGCtgatagcaagcttgcc	1	1	4	31	91	58
415	BG505_gp41_21_L	aggaattctacgctgagtGCTGTCTTCCTTGGGTTCTTAGGAGCAGCAGGAAGCACTATGGGCCTGGCGTCAATGACGCTGACGGTACAGGCCAGAAATTTATTATCTGGCtgatagcaagcttgcc	0	1	0	0	67	41
416	BG505_gp41_21_F	aggaattctacgctgagtGCTGTCTTCCTTGGGTTCTTAGGAGCAGCAGGAAGCACTATGGGCTTCGCGTCAATGACGCTGACGGTACAGGCCAGAAATTTATTATCTGGCtgatagcaagcttgcc	2	3	1	12	139	89
417	BG505_gp41_21_Q	aggaattctacgctgagtGCTGTCTTCCTTGGGTTCTTAGGAGCAGCAGGAAGCACTATGGGCCAGGCGTCAATGACGCTGACGGTACAGGCCAGAAATTTATTATCTGGCtgatagcaagcttgcc	5	5	4	1	169	103
418	BG505_gp41_21_H	aggaattctacgctgagtGCTGTCTTCCTTGGGTTCTTAGGAGCAGCAGGAAGCACTATGGGCCACGCGTCAATGACGCTGACGGTACAGGCCAGAAATTTATTATCTGGCtgatagcaagcttgcc	2	10	11	7	195	119
419	BG505_gp41_21_P	aggaattctacgctgagtGCTGTCTTCCTTGGGTTCTTAGGAGCAGCAGGAAGCACTATGGGCCCGGCGTCAATGACGCTGACGGTACAGGCCAGAAATTTATTATCTGGCtgatagcaagcttgcc	0	4	15	0	152	125
420	BG505_gp41_22_G	aggaattctacgctgagtGTCTTCCTTGGGTTCTTAGGAGCAGCAGGAAGCACTATGGGCGCGGGTTCAATGACGCTGACGGTACAGGCCAGAAATTTATTATCTGGCATAtgatagcaagcttgcc	0	3	1	0	74	50
421	BG505_gp41_22_E	aggaattctacgctgagtGTCTTCCTTGGGTTCTTAGGAGCAGCAGGAAGCACTATGGGCGCGGAATCAATGACGCTGACGGTACAGGCCAGAAATTTATTATCTGGCATAtgatagcaagcttgcc	2	6	2	0	170	131
422	BG505_gp41_22_D	aggaattctacgctgagtGTCTTCCTTGGGTTCTTAGGAGCAGCAGGAAGCACTATGGGCGCGGACTCAATGACGCTGACGGTACAGGCCAGAAATTTATTATCTGGCATAtgatagcaagcttgcc	1	0	0	0	58	39
423	BG505_gp41_22_V	aggaattctacgctgagtGTCTTCCTTGGGTTCTTAGGAGCAGCAGGAAGCACTATGGGCGCGGTTTCAATGACGCTGACGGTACAGGCCAGAAATTTATTATCTGGCATAtgatagcaagcttgcc	0	0	0	0	43	38
424	BG505_gp41_22_A	aggaattctacgctgagtGTCTTCCTTGGGTTCTTAGGAGCAGCAGGAAGCACTATGGGCGCGGCTTCAATGACGCTGACGGTACAGGCCAGAAATTTATTATCTGGCATAtgatagcaagcttgcc	3	2	9	0	74	64
425	BG505_gp41_22_R	aggaattctacgctgagtGTCTTCCTTGGGTTCTTAGGAGCAGCAGGAAGCACTATGGGCGCGCGTTCAATGACGCTGACGGTACAGGCCAGAAATTTATTATCTGGCATAtgatagcaagcttgcc	2	6	43	16	242	159
426	BG505_gp41_22_S	aggaattctacgctgagtGTCTTCCTTGGGTTCTTAGGAGCAGCAGGAAGCACTATGGGCGCGTCTTCAATGACGCTGACGGTACAGGCCAGAAATTTATTATCTGGCATAtgatagcaagcttgcc	2	2	27	0	239	138
427	BG505_gp41_22_K	aggaattctacgctgagtGTCTTCCTTGGGTTCTTAGGAGCAGCAGGAAGCACTATGGGCGCGAAATCAATGACGCTGACGGTACAGGCCAGAAATTTATTATCTGGCATAtgatagcaagcttgcc	4	1	14	18	366	245
428	BG505_gp41_22_N	aggaattctacgctgagtGTCTTCCTTGGGTTCTTAGGAGCAGCAGGAAGCACTATGGGCGCGAACTCAATGACGCTGACGGTACAGGCCAGAAATTTATTATCTGGCATAtgatagcaagcttgcc	1	3	13	2	201	172
429	BG505_gp41_22_M	aggaattctacgctgagtGTCTTCCTTGGGTTCTTAGGAGCAGCAGGAAGCACTATGGGCGCGATGTCAATGACGCTGACGGTACAGGCCAGAAATTTATTATCTGGCATAtgatagcaagcttgcc	0	1	7	0	67	43
430	BG505_gp41_22_I	aggaattctacgctgagtGTCTTCCTTGGGTTCTTAGGAGCAGCAGGAAGCACTATGGGCGCGATCTCAATGACGCTGACGGTACAGGCCAGAAATTTATTATCTGGCATAtgatagcaagcttgcc	0	0	1	0	46	38
431	BG505_gp41_22_T	aggaattctacgctgagtGTCTTCCTTGGGTTCTTAGGAGCAGCAGGAAGCACTATGGGCGCGACCTCAATGACGCTGACGGTACAGGCCAGAAATTTATTATCTGGCATAtgatagcaagcttgcc	0	5	9	0	90	67
432	BG505_gp41_22_W	aggaattctacgctgagtGTCTTCCTTGGGTTCTTAGGAGCAGCAGGAAGCACTATGGGCGCGTGGTCAATGACGCTGACGGTACAGGCCAGAAATTTATTATCTGGCATAtgatagcaagcttgcc	0	0	21	0	25	27
433	BG505_gp41_22_C	aggaattctacgctgagtGTCTTCCTTGGGTTCTTAGGAGCAGCAGGAAGCACTATGGGCGCGTGCTCAATGACGCTGACGGTACAGGCCAGAAATTTATTATCTGGCATAtgatagcaagcttgcc	1	0	4	57	86	56
434	BG505_gp41_22_Y	aggaattctacgctgagtGTCTTCCTTGGGTTCTTAGGAGCAGCAGGAAGCACTATGGGCGCGTACTCAATGACGCTGACGGTACAGGCCAGAAATTTATTATCTGGCATAtgatagcaagcttgcc	3	4	14	20	78	47
435	BG505_gp41_22_L	aggaattctacgctgagtGTCTTCCTTGGGTTCTTAGGAGCAGCAGGAAGCACTATGGGCGCGCTGTCAATGACGCTGACGGTACAGGCCAGAAATTTATTATCTGGCATAtgatagcaagcttgcc	1	1	4	0	9	4
436	BG505_gp41_22_F	aggaattctacgctgagtGTCTTCCTTGGGTTCTTAGGAGCAGCAGGAAGCACTATGGGCGCGTTCTCAATGACGCTGACGGTACAGGCCAGAAATTTATTATCTGGCATAtgatagcaagcttgcc	0	0	0	1	20	10
437	BG505_gp41_22_Q	aggaattctacgctgagtGTCTTCCTTGGGTTCTTAGGAGCAGCAGGAAGCACTATGGGCGCGCAGTCAATGACGCTGACGGTACAGGCCAGAAATTTATTATCTGGCATAtgatagcaagcttgcc	1	1	15	0	26	19
438	BG505_gp41_22_H	aggaattctacgctgagtGTCTTCCTTGGGTTCTTAGGAGCAGCAGGAAGCACTATGGGCGCGCACTCAATGACGCTGACGGTACAGGCCAGAAATTTATTATCTGGCATAtgatagcaagcttgcc	1	0	5	0	25	15
439	BG505_gp41_22_P	aggaattctacgctgagtGTCTTCCTTGGGTTCTTAGGAGCAGCAGGAAGCACTATGGGCGCGCCGTCAATGACGCTGACGGTACAGGCCAGAAATTTATTATCTGGCATAtgatagcaagcttgcc	2	0	0	0	52	39
440	BG505_gp41_23_G	aggaattctacgctgagtTTCCTTGGGTTCTTAGGAGCAGCAGGAAGCACTATGGGCGCGGCGGGTATGACGCTGACGGTACAGGCCAGAAATTTATTATCTGGCATAGTGtgatagcaagcttgcc	0	0	0	0	8	5
441	BG505_gp41_23_E	aggaattctacgctgagtTTCCTTGGGTTCTTAGGAGCAGCAGGAAGCACTATGGGCGCGGCGGAAATGACGCTGACGGTACAGGCCAGAAATTTATTATCTGGCATAGTGtgatagcaagcttgcc	1	1	0	0	6	5
442	BG505_gp41_23_D	aggaattctacgctgagtTTCCTTGGGTTCTTAGGAGCAGCAGGAAGCACTATGGGCGCGGCGGACATGACGCTGACGGTACAGGCCAGAAATTTATTATCTGGCATAGTGtgatagcaagcttgcc	1	0	0	0	7	12
443	BG505_gp41_23_V	aggaattctacgctgagtTTCCTTGGGTTCTTAGGAGCAGCAGGAAGCACTATGGGCGCGGCGGTTATGACGCTGACGGTACAGGCCAGAAATTTATTATCTGGCATAGTGtgatagcaagcttgcc	0	0	0	0	23	18
444	BG505_gp41_23_A	aggaattctacgctgagtTTCCTTGGGTTCTTAGGAGCAGCAGGAAGCACTATGGGCGCGGCGGCTATGACGCTGACGGTACAGGCCAGAAATTTATTATCTGGCATAGTGtgatagcaagcttgcc	0	0	0	0	11	5
445	BG505_gp41_23_R	aggaattctacgctgagtTTCCTTGGGTTCTTAGGAGCAGCAGGAAGCACTATGGGCGCGGCGCGTATGACGCTGACGGTACAGGCCAGAAATTTATTATCTGGCATAGTGtgatagcaagcttgcc	0	0	0	0	13	7
446	BG505_gp41_23_S	aggaattctacgctgagtTTCCTTGGGTTCTTAGGAGCAGCAGGAAGCACTATGGGCGCGGCGTCTATGACGCTGACGGTACAGGCCAGAAATTTATTATCTGGCATAGTGtgatagcaagcttgcc	0	0	0	2	3	4
447	BG505_gp41_23_K	aggaattctacgctgagtTTCCTTGGGTTCTTAGGAGCAGCAGGAAGCACTATGGGCGCGGCGAAAATGACGCTGACGGTACAGGCCAGAAATTTATTATCTGGCATAGTGtgatagcaagcttgcc	0	0	4	0	6	2
448	BG505_gp41_23_N	aggaattctacgctgagtTTCCTTGGGTTCTTAGGAGCAGCAGGAAGCACTATGGGCGCGGCGAACATGACGCTGACGGTACAGGCCAGAAATTTATTATCTGGCATAGTGtgatagcaagcttgcc	0	0	0	0	8	0
449	BG505_gp41_23_M	aggaattctacgctgagtTTCCTTGGGTTCTTAGGAGCAGCAGGAAGCACTATGGGCGCGGCGATGATGACGCTGACGGTACAGGCCAGAAATTTATTATCTGGCATAGTGtgatagcaagcttgcc	0	0	0	0	1	1
450	BG505_gp41_23_I	aggaattctacgctgagtTTCCTTGGGTTCTTAGGAGCAGCAGGAAGCACTATGGGCGCGGCGATCATGACGCTGACGGTACAGGCCAGAAATTTATTATCTGGCATAGTGtgatagcaagcttgcc	0	0	0	0	4	3
451	BG505_gp41_23_T	aggaattctacgctgagtTTCCTTGGGTTCTTAGGAGCAGCAGGAAGCACTATGGGCGCGGCGACCATGACGCTGACGGTACAGGCCAGAAATTTATTATCTGGCATAGTGtgatagcaagcttgcc	1	4	0	8	34	24
452	BG505_gp41_23_W	aggaattctacgctgagtTTCCTTGGGTTCTTAGGAGCAGCAGGAAGCACTATGGGCGCGGCGTGGATGACGCTGACGGTACAGGCCAGAAATTTATTATCTGGCATAGTGtgatagcaagcttgcc	0	0	0	0	8	6
453	BG505_gp41_23_C	aggaattctacgctgagtTTCCTTGGGTTCTTAGGAGCAGCAGGAAGCACTATGGGCGCGGCGTGCATGACGCTGACGGTACAGGCCAGAAATTTATTATCTGGCATAGTGtgatagcaagcttgcc	2	0	2	0	32	25
454	BG505_gp41_23_Y	aggaattctacgctgagtTTCCTTGGGTTCTTAGGAGCAGCAGGAAGCACTATGGGCGCGGCGTACATGACGCTGACGGTACAGGCCAGAAATTTATTATCTGGCATAGTGtgatagcaagcttgcc	0	0	0	0	3	1
455	BG505_gp41_23_L	aggaattctacgctgagtTTCCTTGGGTTCTTAGGAGCAGCAGGAAGCACTATGGGCGCGGCGCTGATGACGCTGACGGTACAGGCCAGAAATTTATTATCTGGCATAGTGtgatagcaagcttgcc	0	0	0	0	4	3
456	BG505_gp41_23_F	aggaattctacgctgagtTTCCTTGGGTTCTTAGGAGCAGCAGGAAGCACTATGGGCGCGGCGTTCATGACGCTGACGGTACAGGCCAGAAATTTATTATCTGGCATAGTGtgatagcaagcttgcc	0	0	0	0	4	4
457	BG505_gp41_23_Q	aggaattctacgctgagtTTCCTTGGGTTCTTAGGAGCAGCAGGAAGCACTATGGGCGCGGCGCAGATGACGCTGACGGTACAGGCCAGAAATTTATTATCTGGCATAGTGtgatagcaagcttgcc	0	1	0	0	27	14
458	BG505_gp41_23_H	aggaattctacgctgagtTTCCTTGGGTTCTTAGGAGCAGCAGGAAGCACTATGGGCGCGGCGCACATGACGCTGACGGTACAGGCCAGAAATTTATTATCTGGCATAGTGtgatagcaagcttgcc	0	1	0	0	7	3
459	BG505_gp41_23_P	aggaattctacgctgagtTTCCTTGGGTTCTTAGGAGCAGCAGGAAGCACTATGGGCGCGGCGCCGATGACGCTGACGGTACAGGCCAGAAATTTATTATCTGGCATAGTGtgatagcaagcttgcc	0	1	19	0	69	56
460	BG505_gp41_24_G	aggaattctacgctgagtCTTGGGTTCTTAGGAGCAGCAGGAAGCACTATGGGCGCGGCGTCAGGTACGCTGACGGTACAGGCCAGAAATTTATTATCTGGCATAGTGCAAtgatagcaagcttgcc	7	2	1	22	133	97
461	BG505_gp41_24_E	aggaattctacgctgagtCTTGGGTTCTTAGGAGCAGCAGGAAGCACTATGGGCGCGGCGTCAGAAACGCTGACGGTACAGGCCAGAAATTTATTATCTGGCATAGTGCAAtgatagcaagcttgcc	1	2	11	0	76	66
462	BG505_gp41_24_D	aggaattctacgctgagtCTTGGGTTCTTAGGAGCAGCAGGAAGCACTATGGGCGCGGCGTCAGACACGCTGACGGTACAGGCCAGAAATTTATTATCTGGCATAGTGCAAtgatagcaagcttgcc	2	2	9	1	127	120
463	BG505_gp41_24_V	aggaattctacgctgagtCTTGGGTTCTTAGGAGCAGCAGGAAGCACTATGGGCGCGGCGTCAGTTACGCTGACGGTACAGGCCAGAAATTTATTATCTGGCATAGTGCAAtgatagcaagcttgcc	3	3	4	2	105	110
464	BG505_gp41_24_A	aggaattctacgctgagtCTTGGGTTCTTAGGAGCAGCAGGAAGCACTATGGGCGCGGCGTCAGCTACGCTGACGGTACAGGCCAGAAATTTATTATCTGGCATAGTGCAAtgatagcaagcttgcc	0	0	0	0	5	0
465	BG505_gp41_24_R	aggaattctacgctgagtCTTGGGTTCTTAGGAGCAGCAGGAAGCACTATGGGCGCGGCGTCACGTACGCTGACGGTACAGGCCAGAAATTTATTATCTGGCATAGTGCAAtgatagcaagcttgcc	4	5	18	7	136	135
466	BG505_gp41_24_S	aggaattctacgctgagtCTTGGGTTCTTAGGAGCAGCAGGAAGCACTATGGGCGCGGCGTCATCTACGCTGACGGTACAGGCCAGAAATTTATTATCTGGCATAGTGCAAtgatagcaagcttgcc	1	0	0	0	39	33
467	BG505_gp41_24_K	aggaattctacgctgagtCTTGGGTTCTTAGGAGCAGCAGGAAGCACTATGGGCGCGGCGTCAAAAACGCTGACGGTACAGGCCAGAAATTTATTATCTGGCATAGTGCAAtgatagcaagcttgcc	3	1	0	44	157	133
468	BG505_gp41_24_N	aggaattctacgctgagtCTTGGGTTCTTAGGAGCAGCAGGAAGCACTATGGGCGCGGCGTCAAACACGCTGACGGTACAGGCCAGAAATTTATTATCTGGCATAGTGCAAtgatagcaagcttgcc	1	1	0	0	111	111
469	BG505_gp41_24_M	aggaattctacgctgagtCTTGGGTTCTTAGGAGCAGCAGGAAGCACTATGGGCGCGGCGTCAATGACGCTGACGGTACAGGCCAGAAATTTATTATCTGGCATAGTGCAAtgatagcaagcttgcc	4	1	11	0	139	119
470	BG505_gp41_24_I	aggaattctacgctgagtCTTGGGTTCTTAGGAGCAGCAGGAAGCACTATGGGCGCGGCGTCAATCACGCTGACGGTACAGGCCAGAAATTTATTATCTGGCATAGTGCAAtgatagcaagcttgcc	1	5	0	6	45	32
471	BG505_gp41_24_T	aggaattctacgctgagtCTTGGGTTCTTAGGAGCAGCAGGAAGCACTATGGGCGCGGCGTCAACCACGCTGACGGTACAGGCCAGAAATTTATTATCTGGCATAGTGCAAtgatagcaagcttgcc	1	1	1	3	49	28
472	BG505_gp41_24_W	aggaattctacgctgagtCTTGGGTTCTTAGGAGCAGCAGGAAGCACTATGGGCGCGGCGTCATGGACGCTGACGGTACAGGCCAGAAATTTATTATCTGGCATAGTGCAAtgatagcaagcttgcc	0	0	7	0	10	11
473	BG505_gp41_24_C	aggaattctacgctgagtCTTGGGTTCTTAGGAGCAGCAGGAAGCACTATGGGCGCGGCGTCATGCACGCTGACGGTACAGGCCAGAAATTTATTATCTGGCATAGTGCAAtgatagcaagcttgcc	0	0	0	2	37	31
474	BG505_gp41_24_Y	aggaattctacgctgagtCTTGGGTTCTTAGGAGCAGCAGGAAGCACTATGGGCGCGGCGTCATACACGCTGACGGTACAGGCCAGAAATTTATTATCTGGCATAGTGCAAtgatagcaagcttgcc	0	0	0	0	31	34
475	BG505_gp41_24_L	aggaattctacgctgagtCTTGGGTTCTTAGGAGCAGCAGGAAGCACTATGGGCGCGGCGTCACTGACGCTGACGGTACAGGCCAGAAATTTATTATCTGGCATAGTGCAAtgatagcaagcttgcc	1	1	0	0	34	16
476	BG505_gp41_24_F	aggaattctacgctgagtCTTGGGTTCTTAGGAGCAGCAGGAAGCACTATGGGCGCGGCGTCATTCACGCTGACGGTACAGGCCAGAAATTTATTATCTGGCATAGTGCAAtgatagcaagcttgcc	3	1	31	19	106	85
477	BG505_gp41_24_Q	aggaattctacgctgagtCTTGGGTTCTTAGGAGCAGCAGGAAGCACTATGGGCGCGGCGTCACAGACGCTGACGGTACAGGCCAGAAATTTATTATCTGGCATAGTGCAAtgatagcaagcttgcc	1	0	1	18	50	41
478	BG505_gp41_24_H	aggaattctacgctgagtCTTGGGTTCTTAGGAGCAGCAGGAAGCACTATGGGCGCGGCGTCACACACGCTGACGGTACAGGCCAGAAATTTATTATCTGGCATAGTGCAAtgatagcaagcttgcc	0	2	9	0	217	165
479	BG505_gp41_24_P	aggaattctacgctgagtCTTGGGTTCTTAGGAGCAGCAGGAAGCACTATGGGCGCGGCGTCACCGACGCTGACGGTACAGGCCAGAAATTTATTATCTGGCATAGTGCAAtgatagcaagcttgcc	0	0	0	0	33	29
480	BG505_gp41_25_G	aggaattctacgctgagtGGGTTCTTAGGAGCAGCAGGAAGCACTATGGGCGCGGCGTCAATGGGTCTGACGGTACAGGCCAGAAATTTATTATCTGGCATAGTGCAACAGtgatagcaagcttgcc	0	4	0	8	61	44
481	BG505_gp41_25_E	aggaattctacgctgagtGGGTTCTTAGGAGCAGCAGGAAGCACTATGGGCGCGGCGTCAATGGAACTGACGGTACAGGCCAGAAATTTATTATCTGGCATAGTGCAACAGtgatagcaagcttgcc	0	1	0	3	52	45
482	BG505_gp41_25_D	aggaattctacgctgagtGGGTTCTTAGGAGCAGCAGGAAGCACTATGGGCGCGGCGTCAATGGACCTGACGGTACAGGCCAGAAATTTATTATCTGGCATAGTGCAACAGtgatagcaagcttgcc	2	0	0	0	46	57
483	BG505_gp41_25_V	aggaattctacgctgagtGGGTTCTTAGGAGCAGCAGGAAGCACTATGGGCGCGGCGTCAATGGTTCTGACGGTACAGGCCAGAAATTTATTATCTGGCATAGTGCAACAGtgatagcaagcttgcc	1	2	5	18	144	97
484	BG505_gp41_25_A	aggaattctacgctgagtGGGTTCTTAGGAGCAGCAGGAAGCACTATGGGCGCGGCGTCAATGGCTCTGACGGTACAGGCCAGAAATTTATTATCTGGCATAGTGCAACAGtgatagcaagcttgcc	4	3	7	59	170	151
485	BG505_gp41_25_R	aggaattctacgctgagtGGGTTCTTAGGAGCAGCAGGAAGCACTATGGGCGCGGCGTCAATGCGTCTGACGGTACAGGCCAGAAATTTATTATCTGGCATAGTGCAACAGtgatagcaagcttgcc	1	1	5	0	107	74
486	BG505_gp41_25_S	aggaattctacgctgagtGGGTTCTTAGGAGCAGCAGGAAGCACTATGGGCGCGGCGTCAATGTCTCTGACGGTACAGGCCAGAAATTTATTATCTGGCATAGTGCAACAGtgatagcaagcttgcc	0	0	13	0	89	61
487	BG505_gp41_25_K	aggaattctacgctgagtGGGTTCTTAGGAGCAGCAGGAAGCACTATGGGCGCGGCGTCAATGAAACTGACGGTACAGGCCAGAAATTTATTATCTGGCATAGTGCAACAGtgatagcaagcttgcc	1	0	5	17	151	119
488	BG505_gp41_25_N	aggaattctacgctgagtGGGTTCTTAGGAGCAGCAGGAAGCACTATGGGCGCGGCGTCAATGAACCTGACGGTACAGGCCAGAAATTTATTATCTGGCATAGTGCAACAGtgatagcaagcttgcc	4	2	1	6	70	50
489	BG505_gp41_25_M	aggaattctacgctgagtGGGTTCTTAGGAGCAGCAGGAAGCACTATGGGCGCGGCGTCAATGATGCTGACGGTACAGGCCAGAAATTTATTATCTGGCATAGTGCAACAGtgatagcaagcttgcc	1	2	0	2	64	44
490	BG505_gp41_25_I	aggaattctacgctgagtGGGTTCTTAGGAGCAGCAGGAAGCACTATGGGCGCGGCGTCAATGATCCTGACGGTACAGGCCAGAAATTTATTATCTGGCATAGTGCAACAGtgatagcaagcttgcc	4	2	9	0	100	96
491	BG505_gp41_25_T	aggaattctacgctgagtGGGTTCTTAGGAGCAGCAGGAAGCACTATGGGCGCGGCGTCAATGACCCTGACGGTACAGGCCAGAAATTTATTATCTGGCATAGTGCAACAGtgatagcaagcttgcc	0	1	0	0	18	22
492	BG505_gp41_25_W	aggaattctacgctgagtGGGTTCTTAGGAGCAGCAGGAAGCACTATGGGCGCGGCGTCAATGTGGCTGACGGTACAGGCCAGAAATTTATTATCTGGCATAGTGCAACAGtgatagcaagcttgcc	0	1	12	0	12	15
493	BG505_gp41_25_C	aggaattctacgctgagtGGGTTCTTAGGAGCAGCAGGAAGCACTATGGGCGCGGCGTCAATGTGCCTGACGGTACAGGCCAGAAATTTATTATCTGGCATAGTGCAACAGtgatagcaagcttgcc	0	1	10	2	28	28
494	BG505_gp41_25_Y	aggaattctacgctgagtGGGTTCTTAGGAGCAGCAGGAAGCACTATGGGCGCGGCGTCAATGTACCTGACGGTACAGGCCAGAAATTTATTATCTGGCATAGTGCAACAGtgatagcaagcttgcc	1	0	0	0	54	55
495	BG505_gp41_25_L	aggaattctacgctgagtGGGTTCTTAGGAGCAGCAGGAAGCACTATGGGCGCGGCGTCAATGCTGCTGACGGTACAGGCCAGAAATTTATTATCTGGCATAGTGCAACAGtgatagcaagcttgcc	0	1	0	0	11	17
496	BG505_gp41_25_F	aggaattctacgctgagtGGGTTCTTAGGAGCAGCAGGAAGCACTATGGGCGCGGCGTCAATGTTCCTGACGGTACAGGCCAGAAATTTATTATCTGGCATAGTGCAACAGtgatagcaagcttgcc	1	2	6	0	29	33
497	BG505_gp41_25_Q	aggaattctacgctgagtGGGTTCTTAGGAGCAGCAGGAAGCACTATGGGCGCGGCGTCAATGCAGCTGACGGTACAGGCCAGAAATTTATTATCTGGCATAGTGCAACAGtgatagcaagcttgcc	0	1	0	0	33	27
498	BG505_gp41_25_H	aggaattctacgctgagtGGGTTCTTAGGAGCAGCAGGAAGCACTATGGGCGCGGCGTCAATGCACCTGACGGTACAGGCCAGAAATTTATTATCTGGCATAGTGCAACAGtgatagcaagcttgcc	1	0	0	0	48	30
499	BG505_gp41_25_P	aggaattctacgctgagtGGGTTCTTAGGAGCAGCAGGAAGCACTATGGGCGCGGCGTCAATGCCGCTGACGGTACAGGCCAGAAATTTATTATCTGGCATAGTGCAACAGtgatagcaagcttgcc	2	1	3	3	88	76
500	BG505_gp41_26_G	aggaattctacgctgagtTTCTTAGGAGCAGCAGGAAGCACTATGGGCGCGGCGTCAATGACGGGTACGGTACAGGCCAGAAATTTATTATCTGGCATAGTGCAACAGCAAtgatagcaagcttgcc	0	0	0	0	14	9
501	BG505_gp41_26_E	aggaattctacgctgagtTTCTTAGGAGCAGCAGGAAGCACTATGGGCGCGGCGTCAATGACGGAAACGGTACAGGCCAGAAATTTATTATCTGGCATAGTGCAACAGCAAtgatagcaagcttgcc	0	1	1	0	54	35
502	BG505_gp41_26_D	aggaattctacgctgagtTTCTTAGGAGCAGCAGGAAGCACTATGGGCGCGGCGTCAATGACGGACACGGTACAGGCCAGAAATTTATTATCTGGCATAGTGCAACAGCAAtgatagcaagcttgcc	0	0	29	0	42	24
503	BG505_gp41_26_V	aggaattctacgctgagtTTCTTAGGAGCAGCAGGAAGCACTATGGGCGCGGCGTCAATGACGGTTACGGTACAGGCCAGAAATTTATTATCTGGCATAGTGCAACAGCAAtgatagcaagcttgcc	2	1	16	0	100	70
504	BG505_gp41_26_A	aggaattctacgctgagtTTCTTAGGAGCAGCAGGAAGCACTATGGGCGCGGCGTCAATGACGGCTACGGTACAGGCCAGAAATTTATTATCTGGCATAGTGCAACAGCAAtgatagcaagcttgcc	0	0	0	0	11	6
505	BG505_gp41_26_R	aggaattctacgctgagtTTCTTAGGAGCAGCAGGAAGCACTATGGGCGCGGCGTCAATGACGCGTACGGTACAGGCCAGAAATTTATTATCTGGCATAGTGCAACAGCAAtgatagcaagcttgcc	0	0	2	33	131	84
506	BG505_gp41_26_S	aggaattctacgctgagtTTCTTAGGAGCAGCAGGAAGCACTATGGGCGCGGCGTCAATGACGTCTACGGTACAGGCCAGAAATTTATTATCTGGCATAGTGCAACAGCAAtgatagcaagcttgcc	0	1	0	0	5	5
507	BG505_gp41_26_K	aggaattctacgctgagtTTCTTAGGAGCAGCAGGAAGCACTATGGGCGCGGCGTCAATGACGAAAACGGTACAGGCCAGAAATTTATTATCTGGCATAGTGCAACAGCAAtgatagcaagcttgcc	0	0	0	0	18	15
508	BG505_gp41_26_N	aggaattctacgctgagtTTCTTAGGAGCAGCAGGAAGCACTATGGGCGCGGCGTCAATGACGAACACGGTACAGGCCAGAAATTTATTATCTGGCATAGTGCAACAGCAAtgatagcaagcttgcc	0	1	11	13	127	108
509	BG505_gp41_26_M	aggaattctacgctgagtTTCTTAGGAGCAGCAGGAAGCACTATGGGCGCGGCGTCAATGACGATGACGGTACAGGCCAGAAATTTATTATCTGGCATAGTGCAACAGCAAtgatagcaagcttgcc	2	1	0	32	60	56
510	BG505_gp41_26_I	aggaattctacgctgagtTTCTTAGGAGCAGCAGGAAGCACTATGGGCGCGGCGTCAATGACGATCACGGTACAGGCCAGAAATTTATTATCTGGCATAGTGCAACAGCAAtgatagcaagcttgcc	3	1	0	0	32	25
511	BG505_gp41_26_T	aggaattctacgctgagtTTCTTAGGAGCAGCAGGAAGCACTATGGGCGCGGCGTCAATGACGACCACGGTACAGGCCAGAAATTTATTATCTGGCATAGTGCAACAGCAAtgatagcaagcttgcc	0	0	6	0	20	12
512	BG505_gp41_26_W	aggaattctacgctgagtTTCTTAGGAGCAGCAGGAAGCACTATGGGCGCGGCGTCAATGACGTGGACGGTACAGGCCAGAAATTTATTATCTGGCATAGTGCAACAGCAAtgatagcaagcttgcc	0	0	4	0	4	1
513	BG505_gp41_26_C	aggaattctacgctgagtTTCTTAGGAGCAGCAGGAAGCACTATGGGCGCGGCGTCAATGACGTGCACGGTACAGGCCAGAAATTTATTATCTGGCATAGTGCAACAGCAAtgatagcaagcttgcc	2	1	8	16	98	62
514	BG505_gp41_26_Y	aggaattctacgctgagtTTCTTAGGAGCAGCAGGAAGCACTATGGGCGCGGCGTCAATGACGTACACGGTACAGGCCAGAAATTTATTATCTGGCATAGTGCAACAGCAAtgatagcaagcttgcc	2	3	0	19	114	84
515	BG505_gp41_26_L	aggaattctacgctgagtTTCTTAGGAGCAGCAGGAAGCACTATGGGCGCGGCGTCAATGACGCTGACGGTACAGGCCAGAAATTTATTATCTGGCATAGTGCAACAGCAAtgatagcaagcttgcc	0	0	0	0	17	12
516	BG505_gp41_26_F	aggaattctacgctgagtTTCTTAGGAGCAGCAGGAAGCACTATGGGCGCGGCGTCAATGACGTTCACGGTACAGGCCAGAAATTTATTATCTGGCATAGTGCAACAGCAAtgatagcaagcttgcc	0	2	0	0	22	13
517	BG505_gp41_26_Q	aggaattctacgctgagtTTCTTAGGAGCAGCAGGAAGCACTATGGGCGCGGCGTCAATGACGCAGACGGTACAGGCCAGAAATTTATTATCTGGCATAGTGCAACAGCAAtgatagcaagcttgcc	1	0	10	0	134	76
518	BG505_gp41_26_H	aggaattctacgctgagtTTCTTAGGAGCAGCAGGAAGCACTATGGGCGCGGCGTCAATGACGCACACGGTACAGGCCAGAAATTTATTATCTGGCATAGTGCAACAGCAAtgatagcaagcttgcc	0	0	0	0	23	22
519	BG505_gp41_26_P	aggaattctacgctgagtTTCTTAGGAGCAGCAGGAAGCACTATGGGCGCGGCGTCAATGACGCCGACGGTACAGGCCAGAAATTTATTATCTGGCATAGTGCAACAGCAAtgatagcaagcttgcc	1	0	11	0	40	36
520	BG505_gp41_27_G	aggaattctacgctgagtTTAGGAGCAGCAGGAAGCACTATGGGCGCGGCGTCAATGACGCTGGGTGTACAGGCCAGAAATTTATTATCTGGCATAGTGCAACAGCAAAGCtgatagcaagcttgcc	1	0	12	0	35	28
521	BG505_gp41_27_E	aggaattctacgctgagtTTAGGAGCAGCAGGAAGCACTATGGGCGCGGCGTCAATGACGCTGGAAGTACAGGCCAGAAATTTATTATCTGGCATAGTGCAACAGCAAAGCtgatagcaagcttgcc	1	0	2	0	49	32
522	BG505_gp41_27_D	aggaattctacgctgagtTTAGGAGCAGCAGGAAGCACTATGGGCGCGGCGTCAATGACGCTGGACGTACAGGCCAGAAATTTATTATCTGGCATAGTGCAACAGCAAAGCtgatagcaagcttgcc	4	5	7	3	83	52
523	BG505_gp41_27_V	aggaattctacgctgagtTTAGGAGCAGCAGGAAGCACTATGGGCGCGGCGTCAATGACGCTGGTTGTACAGGCCAGAAATTTATTATCTGGCATAGTGCAACAGCAAAGCtgatagcaagcttgcc	2	6	6	4	180	119
524	BG505_gp41_27_A	aggaattctacgctgagtTTAGGAGCAGCAGGAAGCACTATGGGCGCGGCGTCAATGACGCTGGCTGTACAGGCCAGAAATTTATTATCTGGCATAGTGCAACAGCAAAGCtgatagcaagcttgcc	2	2	0	0	61	60
525	BG505_gp41_27_R	aggaattctacgctgagtTTAGGAGCAGCAGGAAGCACTATGGGCGCGGCGTCAATGACGCTGCGTGTACAGGCCAGAAATTTATTATCTGGCATAGTGCAACAGCAAAGCtgatagcaagcttgcc	3	10	5	20	295	215
526	BG505_gp41_27_S	aggaattctacgctgagtTTAGGAGCAGCAGGAAGCACTATGGGCGCGGCGTCAATGACGCTGTCTGTACAGGCCAGAAATTTATTATCTGGCATAGTGCAACAGCAAAGCtgatagcaagcttgcc	0	0	0	1	11	9
527	BG505_gp41_27_K	aggaattctacgctgagtTTAGGAGCAGCAGGAAGCACTATGGGCGCGGCGTCAATGACGCTGAAAGTACAGGCCAGAAATTTATTATCTGGCATAGTGCAACAGCAAAGCtgatagcaagcttgcc	3	3	2	2	66	53
528	BG505_gp41_27_N	aggaattctacgctgagtTTAGGAGCAGCAGGAAGCACTATGGGCGCGGCGTCAATGACGCTGAACGTACAGGCCAGAAATTTATTATCTGGCATAGTGCAACAGCAAAGCtgatagcaagcttgcc	2	1	12	0	145	89
529	BG505_gp41_27_M	aggaattctacgctgagtTTAGGAGCAGCAGGAAGCACTATGGGCGCGGCGTCAATGACGCTGATGGTACAGGCCAGAAATTTATTATCTGGCATAGTGCAACAGCAAAGCtgatagcaagcttgcc	0	2	14	3	59	36
530	BG505_gp41_27_I	aggaattctacgctgagtTTAGGAGCAGCAGGAAGCACTATGGGCGCGGCGTCAATGACGCTGATCGTACAGGCCAGAAATTTATTATCTGGCATAGTGCAACAGCAAAGCtgatagcaagcttgcc	0	0	7	0	39	26
531	BG505_gp41_27_T	aggaattctacgctgagtTTAGGAGCAGCAGGAAGCACTATGGGCGCGGCGTCAATGACGCTGACCGTACAGGCCAGAAATTTATTATCTGGCATAGTGCAACAGCAAAGCtgatagcaagcttgcc	0	1	0	9	28	32
532	BG505_gp41_27_W	aggaattctacgctgagtTTAGGAGCAGCAGGAAGCACTATGGGCGCGGCGTCAATGACGCTGTGGGTACAGGCCAGAAATTTATTATCTGGCATAGTGCAACAGCAAAGCtgatagcaagcttgcc	1	2	0	3	49	22
533	BG505_gp41_27_C	aggaattctacgctgagtTTAGGAGCAGCAGGAAGCACTATGGGCGCGGCGTCAATGACGCTGTGCGTACAGGCCAGAAATTTATTATCTGGCATAGTGCAACAGCAAAGCtgatagcaagcttgcc	1	2	2	3	159	103
534	BG505_gp41_27_Y	aggaattctacgctgagtTTAGGAGCAGCAGGAAGCACTATGGGCGCGGCGTCAATGACGCTGTACGTACAGGCCAGAAATTTATTATCTGGCATAGTGCAACAGCAAAGCtgatagcaagcttgcc	3	3	3	4	100	79
535	BG505_gp41_27_L	aggaattctacgctgagtTTAGGAGCAGCAGGAAGCACTATGGGCGCGGCGTCAATGACGCTGCTGGTACAGGCCAGAAATTTATTATCTGGCATAGTGCAACAGCAAAGCtgatagcaagcttgcc	3	3	6	0	107	79
536	BG505_gp41_27_F	aggaattctacgctgagtTTAGGAGCAGCAGGAAGCACTATGGGCGCGGCGTCAATGACGCTGTTCGTACAGGCCAGAAATTTATTATCTGGCATAGTGCAACAGCAAAGCtgatagcaagcttgcc	0	0	0	0	5	4
537	BG505_gp41_27_Q	aggaattctacgctgagtTTAGGAGCAGCAGGAAGCACTATGGGCGCGGCGTCAATGACGCTGCAGGTACAGGCCAGAAATTTATTATCTGGCATAGTGCAACAGCAAAGCtgatagcaagcttgcc	2	3	18	0	192	128
538	BG505_gp41_27_H	aggaattctacgctgagtTTAGGAGCAGCAGGAAGCACTATGGGCGCGGCGTCAATGACGCTGCACGTACAGGCCAGAAATTTATTATCTGGCATAGTGCAACAGCAAAGCtgatagcaagcttgcc	1	1	8	0	26	16
539	BG505_gp41_27_P	aggaattctacgctgagtTTAGGAGCAGCAGGAAGCACTATGGGCGCGGCGTCAATGACGCTGCCGGTACAGGCCAGAAATTTATTATCTGGCATAGTGCAACAGCAAAGCtgatagcaagcttgcc	5	1	9	2	176	133
540	BG505_gp41_28_G	aggaattctacgctgagtGGAGCAGCAGGAAGCACTATGGGCGCGGCGTCAATGACGCTGACGGGTCAGGCCAGAAATTTATTATCTGGCATAGTGCAACAGCAAAGCAATtgatagcaagcttgcc	6	4	10	7	338	211
541	BG505_gp41_28_E	aggaattctacgctgagtGGAGCAGCAGGAAGCACTATGGGCGCGGCGTCAATGACGCTGACGGAACAGGCCAGAAATTTATTATCTGGCATAGTGCAACAGCAAAGCAATtgatagcaagcttgcc	3	5	9	5	131	95
542	BG505_gp41_28_D	aggaattctacgctgagtGGAGCAGCAGGAAGCACTATGGGCGCGGCGTCAATGACGCTGACGGACCAGGCCAGAAATTTATTATCTGGCATAGTGCAACAGCAAAGCAATtgatagcaagcttgcc	5	2	15	6	284	236
543	BG505_gp41_28_V	aggaattctacgctgagtGGAGCAGCAGGAAGCACTATGGGCGCGGCGTCAATGACGCTGACGGTTCAGGCCAGAAATTTATTATCTGGCATAGTGCAACAGCAAAGCAATtgatagcaagcttgcc	0	2	15	16	235	170
544	BG505_gp41_28_A	aggaattctacgctgagtGGAGCAGCAGGAAGCACTATGGGCGCGGCGTCAATGACGCTGACGGCTCAGGCCAGAAATTTATTATCTGGCATAGTGCAACAGCAAAGCAATtgatagcaagcttgcc	1	0	4	0	42	41
545	BG505_gp41_28_R	aggaattctacgctgagtGGAGCAGCAGGAAGCACTATGGGCGCGGCGTCAATGACGCTGACGCGTCAGGCCAGAAATTTATTATCTGGCATAGTGCAACAGCAAAGCAATtgatagcaagcttgcc	2	1	15	0	109	73
546	BG505_gp41_28_S	aggaattctacgctgagtGGAGCAGCAGGAAGCACTATGGGCGCGGCGTCAATGACGCTGACGTCTCAGGCCAGAAATTTATTATCTGGCATAGTGCAACAGCAAAGCAATtgatagcaagcttgcc	1	6	16	46	387	274
547	BG505_gp41_28_K	aggaattctacgctgagtGGAGCAGCAGGAAGCACTATGGGCGCGGCGTCAATGACGCTGACGAAACAGGCCAGAAATTTATTATCTGGCATAGTGCAACAGCAAAGCAATtgatagcaagcttgcc	7	5	10	8	386	285
548	BG505_gp41_28_N	aggaattctacgctgagtGGAGCAGCAGGAAGCACTATGGGCGCGGCGTCAATGACGCTGACGAACCAGGCCAGAAATTTATTATCTGGCATAGTGCAACAGCAAAGCAATtgatagcaagcttgcc	6	2	10	42	263	170
549	BG505_gp41_28_M	aggaattctacgctgagtGGAGCAGCAGGAAGCACTATGGGCGCGGCGTCAATGACGCTGACGATGCAGGCCAGAAATTTATTATCTGGCATAGTGCAACAGCAAAGCAATtgatagcaagcttgcc	7	8	22	79	568	360
550	BG505_gp41_28_I	aggaattctacgctgagtGGAGCAGCAGGAAGCACTATGGGCGCGGCGTCAATGACGCTGACGATCCAGGCCAGAAATTTATTATCTGGCATAGTGCAACAGCAAAGCAATtgatagcaagcttgcc	5	5	23	42	590	386
551	BG505_gp41_28_T	aggaattctacgctgagtGGAGCAGCAGGAAGCACTATGGGCGCGGCGTCAATGACGCTGACGACCCAGGCCAGAAATTTATTATCTGGCATAGTGCAACAGCAAAGCAATtgatagcaagcttgcc	15	15	14	9	509	372
552	BG505_gp41_28_W	aggaattctacgctgagtGGAGCAGCAGGAAGCACTATGGGCGCGGCGTCAATGACGCTGACGTGGCAGGCCAGAAATTTATTATCTGGCATAGTGCAACAGCAAAGCAATtgatagcaagcttgcc	6	4	17	46	262	198
553	BG505_gp41_28_C	aggaattctacgctgagtGGAGCAGCAGGAAGCACTATGGGCGCGGCGTCAATGACGCTGACGTGCCAGGCCAGAAATTTATTATCTGGCATAGTGCAACAGCAAAGCAATtgatagcaagcttgcc	7	2	16	29	346	252
554	BG505_gp41_28_Y	aggaattctacgctgagtGGAGCAGCAGGAAGCACTATGGGCGCGGCGTCAATGACGCTGACGTACCAGGCCAGAAATTTATTATCTGGCATAGTGCAACAGCAAAGCAATtgatagcaagcttgcc	2	2	0	6	100	70
555	BG505_gp41_28_L	aggaattctacgctgagtGGAGCAGCAGGAAGCACTATGGGCGCGGCGTCAATGACGCTGACGCTGCAGGCCAGAAATTTATTATCTGGCATAGTGCAACAGCAAAGCAATtgatagcaagcttgcc	3	1	7	20	210	138
556	BG505_gp41_28_F	aggaattctacgctgagtGGAGCAGCAGGAAGCACTATGGGCGCGGCGTCAATGACGCTGACGTTCCAGGCCAGAAATTTATTATCTGGCATAGTGCAACAGCAAAGCAATtgatagcaagcttgcc	22	10	15	2	588	390
557	BG505_gp41_28_Q	aggaattctacgctgagtGGAGCAGCAGGAAGCACTATGGGCGCGGCGTCAATGACGCTGACGCAGCAGGCCAGAAATTTATTATCTGGCATAGTGCAACAGCAAAGCAATtgatagcaagcttgcc	12	9	21	21	345	253
558	BG505_gp41_28_H	aggaattctacgctgagtGGAGCAGCAGGAAGCACTATGGGCGCGGCGTCAATGACGCTGACGCACCAGGCCAGAAATTTATTATCTGGCATAGTGCAACAGCAAAGCAATtgatagcaagcttgcc	5	5	0	2	112	80
559	BG505_gp41_28_P	aggaattctacgctgagtGGAGCAGCAGGAAGCACTATGGGCGCGGCGTCAATGACGCTGACGCCGCAGGCCAGAAATTTATTATCTGGCATAGTGCAACAGCAAAGCAATtgatagcaagcttgcc	10	6	6	18	378	261
560	BG505_gp41_29_G	aggaattctacgctgagtGCAGCAGGAAGCACTATGGGCGCGGCGTCAATGACGCTGACGGTAGGTGCCAGAAATTTATTATCTGGCATAGTGCAACAGCAAAGCAATTTGtgatagcaagcttgcc	4	7	32	5	346	201
561	BG505_gp41_29_E	aggaattctacgctgagtGCAGCAGGAAGCACTATGGGCGCGGCGTCAATGACGCTGACGGTAGAAGCCAGAAATTTATTATCTGGCATAGTGCAACAGCAAAGCAATTTGtgatagcaagcttgcc	5	4	3	50	330	244
562	BG505_gp41_29_D	aggaattctacgctgagtGCAGCAGGAAGCACTATGGGCGCGGCGTCAATGACGCTGACGGTAGACGCCAGAAATTTATTATCTGGCATAGTGCAACAGCAAAGCAATTTGtgatagcaagcttgcc	19	17	70	57	690	513
563	BG505_gp41_29_V	aggaattctacgctgagtGCAGCAGGAAGCACTATGGGCGCGGCGTCAATGACGCTGACGGTAGTTGCCAGAAATTTATTATCTGGCATAGTGCAACAGCAAAGCAATTTGtgatagcaagcttgcc	5	9	81	97	904	671
564	BG505_gp41_29_A	aggaattctacgctgagtGCAGCAGGAAGCACTATGGGCGCGGCGTCAATGACGCTGACGGTAGCTGCCAGAAATTTATTATCTGGCATAGTGCAACAGCAAAGCAATTTGtgatagcaagcttgcc	9	18	58	70	721	555
565	BG505_gp41_29_R	aggaattctacgctgagtGCAGCAGGAAGCACTATGGGCGCGGCGTCAATGACGCTGACGGTACGTGCCAGAAATTTATTATCTGGCATAGTGCAACAGCAAAGCAATTTGtgatagcaagcttgcc	5	10	31	19	319	247
566	BG505_gp41_29_S	aggaattctacgctgagtGCAGCAGGAAGCACTATGGGCGCGGCGTCAATGACGCTGACGGTATCTGCCAGAAATTTATTATCTGGCATAGTGCAACAGCAAAGCAATTTGtgatagcaagcttgcc	23	11	143	50	1112	816
567	BG505_gp41_29_K	aggaattctacgctgagtGCAGCAGGAAGCACTATGGGCGCGGCGTCAATGACGCTGACGGTAAAAGCCAGAAATTTATTATCTGGCATAGTGCAACAGCAAAGCAATTTGtgatagcaagcttgcc	15	11	14	7	520	320
568	BG505_gp41_29_N	aggaattctacgctgagtGCAGCAGGAAGCACTATGGGCGCGGCGTCAATGACGCTGACGGTAAACGCCAGAAATTTATTATCTGGCATAGTGCAACAGCAAAGCAATTTGtgatagcaagcttgcc	11	6	48	102	498	370
569	BG505_gp41_29_M	aggaattctacgctgagtGCAGCAGGAAGCACTATGGGCGCGGCGTCAATGACGCTGACGGTAATGGCCAGAAATTTATTATCTGGCATAGTGCAACAGCAAAGCAATTTGtgatagcaagcttgcc	10	12	64	51	872	613
570	BG505_gp41_29_I	aggaattctacgctgagtGCAGCAGGAAGCACTATGGGCGCGGCGTCAATGACGCTGACGGTAATCGCCAGAAATTTATTATCTGGCATAGTGCAACAGCAAAGCAATTTGtgatagcaagcttgcc	11	12	38	6	579	435
571	BG505_gp41_29_T	aggaattctacgctgagtGCAGCAGGAAGCACTATGGGCGCGGCGTCAATGACGCTGACGGTAACCGCCAGAAATTTATTATCTGGCATAGTGCAACAGCAAAGCAATTTGtgatagcaagcttgcc	14	13	39	0	557	427
572	BG505_gp41_29_W	aggaattctacgctgagtGCAGCAGGAAGCACTATGGGCGCGGCGTCAATGACGCTGACGGTATGGGCCAGAAATTTATTATCTGGCATAGTGCAACAGCAAAGCAATTTGtgatagcaagcttgcc	17	22	111	84	999	746
573	BG505_gp41_29_C	aggaattctacgctgagtGCAGCAGGAAGCACTATGGGCGCGGCGTCAATGACGCTGACGGTATGCGCCAGAAATTTATTATCTGGCATAGTGCAACAGCAAAGCAATTTGtgatagcaagcttgcc	3	8	46	18	389	328
574	BG505_gp41_29_Y	aggaattctacgctgagtGCAGCAGGAAGCACTATGGGCGCGGCGTCAATGACGCTGACGGTATACGCCAGAAATTTATTATCTGGCATAGTGCAACAGCAAAGCAATTTGtgatagcaagcttgcc	9	5	28	66	440	326
575	BG505_gp41_29_L	aggaattctacgctgagtGCAGCAGGAAGCACTATGGGCGCGGCGTCAATGACGCTGACGGTACTGGCCAGAAATTTATTATCTGGCATAGTGCAACAGCAAAGCAATTTGtgatagcaagcttgcc	7	12	10	14	318	225
576	BG505_gp41_29_F	aggaattctacgctgagtGCAGCAGGAAGCACTATGGGCGCGGCGTCAATGACGCTGACGGTATTCGCCAGAAATTTATTATCTGGCATAGTGCAACAGCAAAGCAATTTGtgatagcaagcttgcc	14	6	36	9	491	366
577	BG505_gp41_29_Q	aggaattctacgctgagtGCAGCAGGAAGCACTATGGGCGCGGCGTCAATGACGCTGACGGTACAGGCCAGAAATTTATTATCTGGCATAGTGCAACAGCAAAGCAATTTGtgatagcaagcttgcc	3	4	13	29	295	243
578	BG505_gp41_29_H	aggaattctacgctgagtGCAGCAGGAAGCACTATGGGCGCGGCGTCAATGACGCTGACGGTACACGCCAGAAATTTATTATCTGGCATAGTGCAACAGCAAAGCAATTTGtgatagcaagcttgcc	8	3	28	9	490	322
579	BG505_gp41_29_P	aggaattctacgctgagtGCAGCAGGAAGCACTATGGGCGCGGCGTCAATGACGCTGACGGTACCGGCCAGAAATTTATTATCTGGCATAGTGCAACAGCAAAGCAATTTGtgatagcaagcttgcc	4	11	37	45	535	348
580	BG505_gp41_30_G	aggaattctacgctgagtGCAGGAAGCACTATGGGCGCGGCGTCAATGACGCTGACGGTACAGGGTAGAAATTTATTATCTGGCATAGTGCAACAGCAAAGCAATTTGCTGtgatagcaagcttgcc	4	2	21	3	286	174
581	BG505_gp41_30_E	aggaattctacgctgagtGCAGGAAGCACTATGGGCGCGGCGTCAATGACGCTGACGGTACAGGAAAGAAATTTATTATCTGGCATAGTGCAACAGCAAAGCAATTTGCTGtgatagcaagcttgcc	18	9	28	45	669	469
582	BG505_gp41_30_D	aggaattctacgctgagtGCAGGAAGCACTATGGGCGCGGCGTCAATGACGCTGACGGTACAGGACAGAAATTTATTATCTGGCATAGTGCAACAGCAAAGCAATTTGCTGtgatagcaagcttgcc	2	5	11	29	204	143
583	BG505_gp41_30_V	aggaattctacgctgagtGCAGGAAGCACTATGGGCGCGGCGTCAATGACGCTGACGGTACAGGTTAGAAATTTATTATCTGGCATAGTGCAACAGCAAAGCAATTTGCTGtgatagcaagcttgcc	2	3	20	3	223	148
584	BG505_gp41_30_A	aggaattctacgctgagtGCAGGAAGCACTATGGGCGCGGCGTCAATGACGCTGACGGTACAGGCTAGAAATTTATTATCTGGCATAGTGCAACAGCAAAGCAATTTGCTGtgatagcaagcttgcc	9	17	29	12	690	524
585	BG505_gp41_30_R	aggaattctacgctgagtGCAGGAAGCACTATGGGCGCGGCGTCAATGACGCTGACGGTACAGCGTAGAAATTTATTATCTGGCATAGTGCAACAGCAAAGCAATTTGCTGtgatagcaagcttgcc	5	3	2	0	126	77
586	BG505_gp41_30_S	aggaattctacgctgagtGCAGGAAGCACTATGGGCGCGGCGTCAATGACGCTGACGGTACAGTCTAGAAATTTATTATCTGGCATAGTGCAACAGCAAAGCAATTTGCTGtgatagcaagcttgcc	5	4	7	4	294	168
587	BG505_gp41_30_K	aggaattctacgctgagtGCAGGAAGCACTATGGGCGCGGCGTCAATGACGCTGACGGTACAGAAAAGAAATTTATTATCTGGCATAGTGCAACAGCAAAGCAATTTGCTGtgatagcaagcttgcc	4	1	33	1	222	134
588	BG505_gp41_30_N	aggaattctacgctgagtGCAGGAAGCACTATGGGCGCGGCGTCAATGACGCTGACGGTACAGAACAGAAATTTATTATCTGGCATAGTGCAACAGCAAAGCAATTTGCTGtgatagcaagcttgcc	9	6	36	19	218	160
589	BG505_gp41_30_M	aggaattctacgctgagtGCAGGAAGCACTATGGGCGCGGCGTCAATGACGCTGACGGTACAGATGAGAAATTTATTATCTGGCATAGTGCAACAGCAAAGCAATTTGCTGtgatagcaagcttgcc	3	0	26	4	210	131
590	BG505_gp41_30_I	aggaattctacgctgagtGCAGGAAGCACTATGGGCGCGGCGTCAATGACGCTGACGGTACAGATCAGAAATTTATTATCTGGCATAGTGCAACAGCAAAGCAATTTGCTGtgatagcaagcttgcc	4	6	5	0	165	126
591	BG505_gp41_30_T	aggaattctacgctgagtGCAGGAAGCACTATGGGCGCGGCGTCAATGACGCTGACGGTACAGACCAGAAATTTATTATCTGGCATAGTGCAACAGCAAAGCAATTTGCTGtgatagcaagcttgcc	3	2	2	20	249	155
592	BG505_gp41_30_W	aggaattctacgctgagtGCAGGAAGCACTATGGGCGCGGCGTCAATGACGCTGACGGTACAGTGGAGAAATTTATTATCTGGCATAGTGCAACAGCAAAGCAATTTGCTGtgatagcaagcttgcc	6	6	15	18	201	131
593	BG505_gp41_30_C	aggaattctacgctgagtGCAGGAAGCACTATGGGCGCGGCGTCAATGACGCTGACGGTACAGTGCAGAAATTTATTATCTGGCATAGTGCAACAGCAAAGCAATTTGCTGtgatagcaagcttgcc	8	2	21	43	300	188
594	BG505_gp41_30_Y	aggaattctacgctgagtGCAGGAAGCACTATGGGCGCGGCGTCAATGACGCTGACGGTACAGTACAGAAATTTATTATCTGGCATAGTGCAACAGCAAAGCAATTTGCTGtgatagcaagcttgcc	2	2	21	42	198	145
595	BG505_gp41_30_L	aggaattctacgctgagtGCAGGAAGCACTATGGGCGCGGCGTCAATGACGCTGACGGTACAGCTGAGAAATTTATTATCTGGCATAGTGCAACAGCAAAGCAATTTGCTGtgatagcaagcttgcc	3	2	3	3	166	100
596	BG505_gp41_30_F	aggaattctacgctgagtGCAGGAAGCACTATGGGCGCGGCGTCAATGACGCTGACGGTACAGTTCAGAAATTTATTATCTGGCATAGTGCAACAGCAAAGCAATTTGCTGtgatagcaagcttgcc	6	7	36	11	278	189
597	BG505_gp41_30_Q	aggaattctacgctgagtGCAGGAAGCACTATGGGCGCGGCGTCAATGACGCTGACGGTACAGCAGAGAAATTTATTATCTGGCATAGTGCAACAGCAAAGCAATTTGCTGtgatagcaagcttgcc	5	3	37	2	257	178
598	BG505_gp41_30_H	aggaattctacgctgagtGCAGGAAGCACTATGGGCGCGGCGTCAATGACGCTGACGGTACAGCACAGAAATTTATTATCTGGCATAGTGCAACAGCAAAGCAATTTGCTGtgatagcaagcttgcc	5	4	23	3	279	175
599	BG505_gp41_30_P	aggaattctacgctgagtGCAGGAAGCACTATGGGCGCGGCGTCAATGACGCTGACGGTACAGCCGAGAAATTTATTATCTGGCATAGTGCAACAGCAAAGCAATTTGCTGtgatagcaagcttgcc	8	13	8	29	622	447
600	BG505_gp41_31_G	aggaattctacgctgagtGGAAGCACTATGGGCGCGGCGTCAATGACGCTGACGGTACAGGCCGGTAATTTATTATCTGGCATAGTGCAACAGCAAAGCAATTTGCTGAGGtgatagcaagcttgcc	5	7	9	27	402	279
601	BG505_gp41_31_E	aggaattctacgctgagtGGAAGCACTATGGGCGCGGCGTCAATGACGCTGACGGTACAGGCCGAAAATTTATTATCTGGCATAGTGCAACAGCAAAGCAATTTGCTGAGGtgatagcaagcttgcc	12	5	0	0	282	197
602	BG505_gp41_31_D	aggaattctacgctgagtGGAAGCACTATGGGCGCGGCGTCAATGACGCTGACGGTACAGGCCGACAATTTATTATCTGGCATAGTGCAACAGCAAAGCAATTTGCTGAGGtgatagcaagcttgcc	7	12	13	6	314	236
603	BG505_gp41_31_V	aggaattctacgctgagtGGAAGCACTATGGGCGCGGCGTCAATGACGCTGACGGTACAGGCCGTTAATTTATTATCTGGCATAGTGCAACAGCAAAGCAATTTGCTGAGGtgatagcaagcttgcc	4	4	14	1	335	204
604	BG505_gp41_31_A	aggaattctacgctgagtGGAAGCACTATGGGCGCGGCGTCAATGACGCTGACGGTACAGGCCGCTAATTTATTATCTGGCATAGTGCAACAGCAAAGCAATTTGCTGAGGtgatagcaagcttgcc	2	5	11	0	172	127
605	BG505_gp41_31_R	aggaattctacgctgagtGGAAGCACTATGGGCGCGGCGTCAATGACGCTGACGGTACAGGCCCGTAATTTATTATCTGGCATAGTGCAACAGCAAAGCAATTTGCTGAGGtgatagcaagcttgcc	6	9	38	32	552	354
606	BG505_gp41_31_S	aggaattctacgctgagtGGAAGCACTATGGGCGCGGCGTCAATGACGCTGACGGTACAGGCCTCTAATTTATTATCTGGCATAGTGCAACAGCAAAGCAATTTGCTGAGGtgatagcaagcttgcc	7	7	31	0	323	222
607	BG505_gp41_31_K	aggaattctacgctgagtGGAAGCACTATGGGCGCGGCGTCAATGACGCTGACGGTACAGGCCAAAAATTTATTATCTGGCATAGTGCAACAGCAAAGCAATTTGCTGAGGtgatagcaagcttgcc	2	9	28	27	251	203
608	BG505_gp41_31_N	aggaattctacgctgagtGGAAGCACTATGGGCGCGGCGTCAATGACGCTGACGGTACAGGCCAACAATTTATTATCTGGCATAGTGCAACAGCAAAGCAATTTGCTGAGGtgatagcaagcttgcc	3	7	0	38	223	142
609	BG505_gp41_31_M	aggaattctacgctgagtGGAAGCACTATGGGCGCGGCGTCAATGACGCTGACGGTACAGGCCATGAATTTATTATCTGGCATAGTGCAACAGCAAAGCAATTTGCTGAGGtgatagcaagcttgcc	13	11	78	33	588	412
610	BG505_gp41_31_I	aggaattctacgctgagtGGAAGCACTATGGGCGCGGCGTCAATGACGCTGACGGTACAGGCCATCAATTTATTATCTGGCATAGTGCAACAGCAAAGCAATTTGCTGAGGtgatagcaagcttgcc	3	5	9	62	303	222
611	BG505_gp41_31_T	aggaattctacgctgagtGGAAGCACTATGGGCGCGGCGTCAATGACGCTGACGGTACAGGCCACCAATTTATTATCTGGCATAGTGCAACAGCAAAGCAATTTGCTGAGGtgatagcaagcttgcc	2	0	14	12	275	225
612	BG505_gp41_31_W	aggaattctacgctgagtGGAAGCACTATGGGCGCGGCGTCAATGACGCTGACGGTACAGGCCTGGAATTTATTATCTGGCATAGTGCAACAGCAAAGCAATTTGCTGAGGtgatagcaagcttgcc	6	5	25	16	371	236
613	BG505_gp41_31_C	aggaattctacgctgagtGGAAGCACTATGGGCGCGGCGTCAATGACGCTGACGGTACAGGCCTGCAATTTATTATCTGGCATAGTGCAACAGCAAAGCAATTTGCTGAGGtgatagcaagcttgcc	6	7	3	3	233	142
614	BG505_gp41_31_Y	aggaattctacgctgagtGGAAGCACTATGGGCGCGGCGTCAATGACGCTGACGGTACAGGCCTACAATTTATTATCTGGCATAGTGCAACAGCAAAGCAATTTGCTGAGGtgatagcaagcttgcc	0	5	29	12	259	178
615	BG505_gp41_31_L	aggaattctacgctgagtGGAAGCACTATGGGCGCGGCGTCAATGACGCTGACGGTACAGGCCCTGAATTTATTATCTGGCATAGTGCAACAGCAAAGCAATTTGCTGAGGtgatagcaagcttgcc	3	4	17	6	200	168
616	BG505_gp41_31_F	aggaattctacgctgagtGGAAGCACTATGGGCGCGGCGTCAATGACGCTGACGGTACAGGCCTTCAATTTATTATCTGGCATAGTGCAACAGCAAAGCAATTTGCTGAGGtgatagcaagcttgcc	4	5	30	2	189	138
617	BG505_gp41_31_Q	aggaattctacgctgagtGGAAGCACTATGGGCGCGGCGTCAATGACGCTGACGGTACAGGCCCAGAATTTATTATCTGGCATAGTGCAACAGCAAAGCAATTTGCTGAGGtgatagcaagcttgcc	9	7	66	34	774	417
618	BG505_gp41_31_H	aggaattctacgctgagtGGAAGCACTATGGGCGCGGCGTCAATGACGCTGACGGTACAGGCCCACAATTTATTATCTGGCATAGTGCAACAGCAAAGCAATTTGCTGAGGtgatagcaagcttgcc	5	8	31	7	264	197
619	BG505_gp41_31_P	aggaattctacgctgagtGGAAGCACTATGGGCGCGGCGTCAATGACGCTGACGGTACAGGCCCCGAATTTATTATCTGGCATAGTGCAACAGCAAAGCAATTTGCTGAGGtgatagcaagcttgcc	5	3	18	13	262	201
620	BG505_gp41_32_G	aggaattctacgctgagtAGCACTATGGGCGCGGCGTCAATGACGCTGACGGTACAGGCCAGAGGTTTATTATCTGGCATAGTGCAACAGCAAAGCAATTTGCTGAGGGCTtgatagcaagcttgcc	0	1	21	0	63	39
621	BG505_gp41_32_E	aggaattctacgctgagtAGCACTATGGGCGCGGCGTCAATGACGCTGACGGTACAGGCCAGAGAATTATTATCTGGCATAGTGCAACAGCAAAGCAATTTGCTGAGGGCTtgatagcaagcttgcc	4	0	11	0	109	59
622	BG505_gp41_32_D	aggaattctacgctgagtAGCACTATGGGCGCGGCGTCAATGACGCTGACGGTACAGGCCAGAGACTTATTATCTGGCATAGTGCAACAGCAAAGCAATTTGCTGAGGGCTtgatagcaagcttgcc	0	3	12	0	79	71
623	BG505_gp41_32_V	aggaattctacgctgagtAGCACTATGGGCGCGGCGTCAATGACGCTGACGGTACAGGCCAGAGTTTTATTATCTGGCATAGTGCAACAGCAAAGCAATTTGCTGAGGGCTtgatagcaagcttgcc	1	1	0	0	22	24
624	BG505_gp41_32_A	aggaattctacgctgagtAGCACTATGGGCGCGGCGTCAATGACGCTGACGGTACAGGCCAGAGCTTTATTATCTGGCATAGTGCAACAGCAAAGCAATTTGCTGAGGGCTtgatagcaagcttgcc	0	2	0	10	29	19
625	BG505_gp41_32_R	aggaattctacgctgagtAGCACTATGGGCGCGGCGTCAATGACGCTGACGGTACAGGCCAGACGTTTATTATCTGGCATAGTGCAACAGCAAAGCAATTTGCTGAGGGCTtgatagcaagcttgcc	2	2	8	0	90	70
626	BG505_gp41_32_S	aggaattctacgctgagtAGCACTATGGGCGCGGCGTCAATGACGCTGACGGTACAGGCCAGATCTTTATTATCTGGCATAGTGCAACAGCAAAGCAATTTGCTGAGGGCTtgatagcaagcttgcc	0	2	0	19	114	108
627	BG505_gp41_32_K	aggaattctacgctgagtAGCACTATGGGCGCGGCGTCAATGACGCTGACGGTACAGGCCAGAAAATTATTATCTGGCATAGTGCAACAGCAAAGCAATTTGCTGAGGGCTtgatagcaagcttgcc	1	3	0	0	38	38
628	BG505_gp41_32_N	aggaattctacgctgagtAGCACTATGGGCGCGGCGTCAATGACGCTGACGGTACAGGCCAGAAACTTATTATCTGGCATAGTGCAACAGCAAAGCAATTTGCTGAGGGCTtgatagcaagcttgcc	1	3	12	0	110	92
629	BG505_gp41_32_M	aggaattctacgctgagtAGCACTATGGGCGCGGCGTCAATGACGCTGACGGTACAGGCCAGAATGTTATTATCTGGCATAGTGCAACAGCAAAGCAATTTGCTGAGGGCTtgatagcaagcttgcc	0	0	2	30	83	50
630	BG505_gp41_32_I	aggaattctacgctgagtAGCACTATGGGCGCGGCGTCAATGACGCTGACGGTACAGGCCAGAATCTTATTATCTGGCATAGTGCAACAGCAAAGCAATTTGCTGAGGGCTtgatagcaagcttgcc	1	1	0	0	54	48
631	BG505_gp41_32_T	aggaattctacgctgagtAGCACTATGGGCGCGGCGTCAATGACGCTGACGGTACAGGCCAGAACCTTATTATCTGGCATAGTGCAACAGCAAAGCAATTTGCTGAGGGCTtgatagcaagcttgcc	4	3	9	2	189	132
632	BG505_gp41_32_W	aggaattctacgctgagtAGCACTATGGGCGCGGCGTCAATGACGCTGACGGTACAGGCCAGATGGTTATTATCTGGCATAGTGCAACAGCAAAGCAATTTGCTGAGGGCTtgatagcaagcttgcc	1	2	0	0	39	26
633	BG505_gp41_32_C	aggaattctacgctgagtAGCACTATGGGCGCGGCGTCAATGACGCTGACGGTACAGGCCAGATGCTTATTATCTGGCATAGTGCAACAGCAAAGCAATTTGCTGAGGGCTtgatagcaagcttgcc	1	0	0	22	151	108
634	BG505_gp41_32_Y	aggaattctacgctgagtAGCACTATGGGCGCGGCGTCAATGACGCTGACGGTACAGGCCAGATACTTATTATCTGGCATAGTGCAACAGCAAAGCAATTTGCTGAGGGCTtgatagcaagcttgcc	1	0	0	15	120	103
635	BG505_gp41_32_L	aggaattctacgctgagtAGCACTATGGGCGCGGCGTCAATGACGCTGACGGTACAGGCCAGACTGTTATTATCTGGCATAGTGCAACAGCAAAGCAATTTGCTGAGGGCTtgatagcaagcttgcc	0	2	4	0	31	19
636	BG505_gp41_32_F	aggaattctacgctgagtAGCACTATGGGCGCGGCGTCAATGACGCTGACGGTACAGGCCAGATTCTTATTATCTGGCATAGTGCAACAGCAAAGCAATTTGCTGAGGGCTtgatagcaagcttgcc	2	0	5	2	107	68
637	BG505_gp41_32_Q	aggaattctacgctgagtAGCACTATGGGCGCGGCGTCAATGACGCTGACGGTACAGGCCAGACAGTTATTATCTGGCATAGTGCAACAGCAAAGCAATTTGCTGAGGGCTtgatagcaagcttgcc	2	2	10	0	85	49
638	BG505_gp41_32_H	aggaattctacgctgagtAGCACTATGGGCGCGGCGTCAATGACGCTGACGGTACAGGCCAGACACTTATTATCTGGCATAGTGCAACAGCAAAGCAATTTGCTGAGGGCTtgatagcaagcttgcc	5	1	2	0	74	66
639	BG505_gp41_32_P	aggaattctacgctgagtAGCACTATGGGCGCGGCGTCAATGACGCTGACGGTACAGGCCAGACCGTTATTATCTGGCATAGTGCAACAGCAAAGCAATTTGCTGAGGGCTtgatagcaagcttgcc	4	7	2	4	191	157
640	BG505_gp41_33_G	aggaattctacgctgagtACTATGGGCGCGGCGTCAATGACGCTGACGGTACAGGCCAGAAATGGTTTATCTGGCATAGTGCAACAGCAAAGCAATTTGCTGAGGGCTATAtgatagcaagcttgcc	4	7	5	5	242	195
641	BG505_gp41_33_E	aggaattctacgctgagtACTATGGGCGCGGCGTCAATGACGCTGACGGTACAGGCCAGAAATGAATTATCTGGCATAGTGCAACAGCAAAGCAATTTGCTGAGGGCTATAtgatagcaagcttgcc	0	2	2	29	94	60
642	BG505_gp41_33_D	aggaattctacgctgagtACTATGGGCGCGGCGTCAATGACGCTGACGGTACAGGCCAGAAATGACTTATCTGGCATAGTGCAACAGCAAAGCAATTTGCTGAGGGCTATAtgatagcaagcttgcc	3	11	0	2	133	101
643	BG505_gp41_33_V	aggaattctacgctgagtACTATGGGCGCGGCGTCAATGACGCTGACGGTACAGGCCAGAAATGTTTTATCTGGCATAGTGCAACAGCAAAGCAATTTGCTGAGGGCTATAtgatagcaagcttgcc	2	3	5	6	177	120
644	BG505_gp41_33_A	aggaattctacgctgagtACTATGGGCGCGGCGTCAATGACGCTGACGGTACAGGCCAGAAATGCTTTATCTGGCATAGTGCAACAGCAAAGCAATTTGCTGAGGGCTATAtgatagcaagcttgcc	2	3	15	0	81	67
645	BG505_gp41_33_R	aggaattctacgctgagtACTATGGGCGCGGCGTCAATGACGCTGACGGTACAGGCCAGAAATCGTTTATCTGGCATAGTGCAACAGCAAAGCAATTTGCTGAGGGCTATAtgatagcaagcttgcc	3	2	4	0	105	65
646	BG505_gp41_33_S	aggaattctacgctgagtACTATGGGCGCGGCGTCAATGACGCTGACGGTACAGGCCAGAAATTCTTTATCTGGCATAGTGCAACAGCAAAGCAATTTGCTGAGGGCTATAtgatagcaagcttgcc	0	2	2	14	136	101
647	BG505_gp41_33_K	aggaattctacgctgagtACTATGGGCGCGGCGTCAATGACGCTGACGGTACAGGCCAGAAATAAATTATCTGGCATAGTGCAACAGCAAAGCAATTTGCTGAGGGCTATAtgatagcaagcttgcc	1	2	0	11	79	62
648	BG505_gp41_33_N	aggaattctacgctgagtACTATGGGCGCGGCGTCAATGACGCTGACGGTACAGGCCAGAAATAACTTATCTGGCATAGTGCAACAGCAAAGCAATTTGCTGAGGGCTATAtgatagcaagcttgcc	7	6	34	51	374	306
649	BG505_gp41_33_M	aggaattctacgctgagtACTATGGGCGCGGCGTCAATGACGCTGACGGTACAGGCCAGAAATATGTTATCTGGCATAGTGCAACAGCAAAGCAATTTGCTGAGGGCTATAtgatagcaagcttgcc	3	1	7	0	140	120
650	BG505_gp41_33_I	aggaattctacgctgagtACTATGGGCGCGGCGTCAATGACGCTGACGGTACAGGCCAGAAATATCTTATCTGGCATAGTGCAACAGCAAAGCAATTTGCTGAGGGCTATAtgatagcaagcttgcc	0	5	5	30	89	59
651	BG505_gp41_33_T	aggaattctacgctgagtACTATGGGCGCGGCGTCAATGACGCTGACGGTACAGGCCAGAAATACCTTATCTGGCATAGTGCAACAGCAAAGCAATTTGCTGAGGGCTATAtgatagcaagcttgcc	1	5	4	46	81	85
652	BG505_gp41_33_W	aggaattctacgctgagtACTATGGGCGCGGCGTCAATGACGCTGACGGTACAGGCCAGAAATTGGTTATCTGGCATAGTGCAACAGCAAAGCAATTTGCTGAGGGCTATAtgatagcaagcttgcc	3	2	24	0	78	66
653	BG505_gp41_33_C	aggaattctacgctgagtACTATGGGCGCGGCGTCAATGACGCTGACGGTACAGGCCAGAAATTGCTTATCTGGCATAGTGCAACAGCAAAGCAATTTGCTGAGGGCTATAtgatagcaagcttgcc	0	1	7	0	65	44
654	BG505_gp41_33_Y	aggaattctacgctgagtACTATGGGCGCGGCGTCAATGACGCTGACGGTACAGGCCAGAAATTACTTATCTGGCATAGTGCAACAGCAAAGCAATTTGCTGAGGGCTATAtgatagcaagcttgcc	7	11	23	79	346	270
655	BG505_gp41_33_L	aggaattctacgctgagtACTATGGGCGCGGCGTCAATGACGCTGACGGTACAGGCCAGAAATCTGTTATCTGGCATAGTGCAACAGCAAAGCAATTTGCTGAGGGCTATAtgatagcaagcttgcc	1	1	4	0	37	18
656	BG505_gp41_33_F	aggaattctacgctgagtACTATGGGCGCGGCGTCAATGACGCTGACGGTACAGGCCAGAAATTTCTTATCTGGCATAGTGCAACAGCAAAGCAATTTGCTGAGGGCTATAtgatagcaagcttgcc	4	6	9	7	177	138
657	BG505_gp41_33_Q	aggaattctacgctgagtACTATGGGCGCGGCGTCAATGACGCTGACGGTACAGGCCAGAAATCAGTTATCTGGCATAGTGCAACAGCAAAGCAATTTGCTGAGGGCTATAtgatagcaagcttgcc	0	1	4	0	94	77
658	BG505_gp41_33_H	aggaattctacgctgagtACTATGGGCGCGGCGTCAATGACGCTGACGGTACAGGCCAGAAATCACTTATCTGGCATAGTGCAACAGCAAAGCAATTTGCTGAGGGCTATAtgatagcaagcttgcc	2	1	0	0	86	71
659	BG505_gp41_33_P	aggaattctacgctgagtACTATGGGCGCGGCGTCAATGACGCTGACGGTACAGGCCAGAAATCCGTTATCTGGCATAGTGCAACAGCAAAGCAATTTGCTGAGGGCTATAtgatagcaagcttgcc	1	2	9	1	69	43
660	BG505_gp41_34_G	aggaattctacgctgagtATGGGCGCGGCGTCAATGACGCTGACGGTACAGGCCAGAAATTTAGGTTCTGGCATAGTGCAACAGCAAAGCAATTTGCTGAGGGCTATAGAGtgatagcaagcttgcc	2	3	14	0	120	113
661	BG505_gp41_34_E	aggaattctacgctgagtATGGGCGCGGCGTCAATGACGCTGACGGTACAGGCCAGAAATTTAGAATCTGGCATAGTGCAACAGCAAAGCAATTTGCTGAGGGCTATAGAGtgatagcaagcttgcc	3	3	3	6	133	77
662	BG505_gp41_34_D	aggaattctacgctgagtATGGGCGCGGCGTCAATGACGCTGACGGTACAGGCCAGAAATTTAGACTCTGGCATAGTGCAACAGCAAAGCAATTTGCTGAGGGCTATAGAGtgatagcaagcttgcc	3	6	50	22	250	149
663	BG505_gp41_34_V	aggaattctacgctgagtATGGGCGCGGCGTCAATGACGCTGACGGTACAGGCCAGAAATTTAGTTTCTGGCATAGTGCAACAGCAAAGCAATTTGCTGAGGGCTATAGAGtgatagcaagcttgcc	9	4	8	0	198	129
664	BG505_gp41_34_A	aggaattctacgctgagtATGGGCGCGGCGTCAATGACGCTGACGGTACAGGCCAGAAATTTAGCTTCTGGCATAGTGCAACAGCAAAGCAATTTGCTGAGGGCTATAGAGtgatagcaagcttgcc	9	10	32	18	448	351
665	BG505_gp41_34_R	aggaattctacgctgagtATGGGCGCGGCGTCAATGACGCTGACGGTACAGGCCAGAAATTTACGTTCTGGCATAGTGCAACAGCAAAGCAATTTGCTGAGGGCTATAGAGtgatagcaagcttgcc	14	14	57	56	744	568
666	BG505_gp41_34_S	aggaattctacgctgagtATGGGCGCGGCGTCAATGACGCTGACGGTACAGGCCAGAAATTTATCTTCTGGCATAGTGCAACAGCAAAGCAATTTGCTGAGGGCTATAGAGtgatagcaagcttgcc	1	1	35	18	171	135
667	BG505_gp41_34_K	aggaattctacgctgagtATGGGCGCGGCGTCAATGACGCTGACGGTACAGGCCAGAAATTTAAAATCTGGCATAGTGCAACAGCAAAGCAATTTGCTGAGGGCTATAGAGtgatagcaagcttgcc	2	1	20	0	129	86
668	BG505_gp41_34_N	aggaattctacgctgagtATGGGCGCGGCGTCAATGACGCTGACGGTACAGGCCAGAAATTTAAACTCTGGCATAGTGCAACAGCAAAGCAATTTGCTGAGGGCTATAGAGtgatagcaagcttgcc	2	3	0	0	75	42
669	BG505_gp41_34_M	aggaattctacgctgagtATGGGCGCGGCGTCAATGACGCTGACGGTACAGGCCAGAAATTTAATGTCTGGCATAGTGCAACAGCAAAGCAATTTGCTGAGGGCTATAGAGtgatagcaagcttgcc	1	3	12	8	237	217
670	BG505_gp41_34_I	aggaattctacgctgagtATGGGCGCGGCGTCAATGACGCTGACGGTACAGGCCAGAAATTTAATCTCTGGCATAGTGCAACAGCAAAGCAATTTGCTGAGGGCTATAGAGtgatagcaagcttgcc	2	1	6	39	89	76
671	BG505_gp41_34_T	aggaattctacgctgagtATGGGCGCGGCGTCAATGACGCTGACGGTACAGGCCAGAAATTTAACCTCTGGCATAGTGCAACAGCAAAGCAATTTGCTGAGGGCTATAGAGtgatagcaagcttgcc	0	2	29	1	250	250
672	BG505_gp41_34_W	aggaattctacgctgagtATGGGCGCGGCGTCAATGACGCTGACGGTACAGGCCAGAAATTTATGGTCTGGCATAGTGCAACAGCAAAGCAATTTGCTGAGGGCTATAGAGtgatagcaagcttgcc	7	6	31	25	502	384
673	BG505_gp41_34_C	aggaattctacgctgagtATGGGCGCGGCGTCAATGACGCTGACGGTACAGGCCAGAAATTTATGCTCTGGCATAGTGCAACAGCAAAGCAATTTGCTGAGGGCTATAGAGtgatagcaagcttgcc	11	7	58	27	425	344
674	BG505_gp41_34_Y	aggaattctacgctgagtATGGGCGCGGCGTCAATGACGCTGACGGTACAGGCCAGAAATTTATACTCTGGCATAGTGCAACAGCAAAGCAATTTGCTGAGGGCTATAGAGtgatagcaagcttgcc	3	4	1	22	181	163
675	BG505_gp41_34_L	aggaattctacgctgagtATGGGCGCGGCGTCAATGACGCTGACGGTACAGGCCAGAAATTTACTGTCTGGCATAGTGCAACAGCAAAGCAATTTGCTGAGGGCTATAGAGtgatagcaagcttgcc	2	9	20	6	301	230
676	BG505_gp41_34_F	aggaattctacgctgagtATGGGCGCGGCGTCAATGACGCTGACGGTACAGGCCAGAAATTTATTCTCTGGCATAGTGCAACAGCAAAGCAATTTGCTGAGGGCTATAGAGtgatagcaagcttgcc	6	6	0	0	240	181
677	BG505_gp41_34_Q	aggaattctacgctgagtATGGGCGCGGCGTCAATGACGCTGACGGTACAGGCCAGAAATTTACAGTCTGGCATAGTGCAACAGCAAAGCAATTTGCTGAGGGCTATAGAGtgatagcaagcttgcc	2	3	1	15	257	184
678	BG505_gp41_34_H	aggaattctacgctgagtATGGGCGCGGCGTCAATGACGCTGACGGTACAGGCCAGAAATTTACACTCTGGCATAGTGCAACAGCAAAGCAATTTGCTGAGGGCTATAGAGtgatagcaagcttgcc	3	4	11	12	125	103
679	BG505_gp41_34_P	aggaattctacgctgagtATGGGCGCGGCGTCAATGACGCTGACGGTACAGGCCAGAAATTTACCGTCTGGCATAGTGCAACAGCAAAGCAATTTGCTGAGGGCTATAGAGtgatagcaagcttgcc	2	1	0	64	91	95
680	BG505_gp41_35_G	aggaattctacgctgagtGGCGCGGCGTCAATGACGCTGACGGTACAGGCCAGAAATTTATTAGGTGGCATAGTGCAACAGCAAAGCAATTTGCTGAGGGCTATAGAGGCTtgatagcaagcttgcc	3	1	3	9	147	95
681	BG505_gp41_35_E	aggaattctacgctgagtGGCGCGGCGTCAATGACGCTGACGGTACAGGCCAGAAATTTATTAGAAGGCATAGTGCAACAGCAAAGCAATTTGCTGAGGGCTATAGAGGCTtgatagcaagcttgcc	0	2	0	0	79	44
682	BG505_gp41_35_D	aggaattctacgctgagtGGCGCGGCGTCAATGACGCTGACGGTACAGGCCAGAAATTTATTAGACGGCATAGTGCAACAGCAAAGCAATTTGCTGAGGGCTATAGAGGCTtgatagcaagcttgcc	0	0	8	0	76	38
683	BG505_gp41_35_V	aggaattctacgctgagtGGCGCGGCGTCAATGACGCTGACGGTACAGGCCAGAAATTTATTAGTTGGCATAGTGCAACAGCAAAGCAATTTGCTGAGGGCTATAGAGGCTtgatagcaagcttgcc	0	3	5	0	74	46
684	BG505_gp41_35_A	aggaattctacgctgagtGGCGCGGCGTCAATGACGCTGACGGTACAGGCCAGAAATTTATTAGCTGGCATAGTGCAACAGCAAAGCAATTTGCTGAGGGCTATAGAGGCTtgatagcaagcttgcc	2	5	13	0	116	94
685	BG505_gp41_35_R	aggaattctacgctgagtGGCGCGGCGTCAATGACGCTGACGGTACAGGCCAGAAATTTATTACGTGGCATAGTGCAACAGCAAAGCAATTTGCTGAGGGCTATAGAGGCTtgatagcaagcttgcc	4	1	0	29	56	55
686	BG505_gp41_35_S	aggaattctacgctgagtGGCGCGGCGTCAATGACGCTGACGGTACAGGCCAGAAATTTATTATCTGGCATAGTGCAACAGCAAAGCAATTTGCTGAGGGCTATAGAGGCTtgatagcaagcttgcc	1	5	9	1	170	95
687	BG505_gp41_35_K	aggaattctacgctgagtGGCGCGGCGTCAATGACGCTGACGGTACAGGCCAGAAATTTATTAAAAGGCATAGTGCAACAGCAAAGCAATTTGCTGAGGGCTATAGAGGCTtgatagcaagcttgcc	2	1	6	21	83	42
688	BG505_gp41_35_N	aggaattctacgctgagtGGCGCGGCGTCAATGACGCTGACGGTACAGGCCAGAAATTTATTAAACGGCATAGTGCAACAGCAAAGCAATTTGCTGAGGGCTATAGAGGCTtgatagcaagcttgcc	1	0	2	5	64	49
689	BG505_gp41_35_M	aggaattctacgctgagtGGCGCGGCGTCAATGACGCTGACGGTACAGGCCAGAAATTTATTAATGGGCATAGTGCAACAGCAAAGCAATTTGCTGAGGGCTATAGAGGCTtgatagcaagcttgcc	1	1	5	0	87	47
690	BG505_gp41_35_I	aggaattctacgctgagtGGCGCGGCGTCAATGACGCTGACGGTACAGGCCAGAAATTTATTAATCGGCATAGTGCAACAGCAAAGCAATTTGCTGAGGGCTATAGAGGCTtgatagcaagcttgcc	1	1	0	0	126	101
691	BG505_gp41_35_T	aggaattctacgctgagtGGCGCGGCGTCAATGACGCTGACGGTACAGGCCAGAAATTTATTAACCGGCATAGTGCAACAGCAAAGCAATTTGCTGAGGGCTATAGAGGCTtgatagcaagcttgcc	8	3	6	2	247	150
692	BG505_gp41_35_W	aggaattctacgctgagtGGCGCGGCGTCAATGACGCTGACGGTACAGGCCAGAAATTTATTATGGGGCATAGTGCAACAGCAAAGCAATTTGCTGAGGGCTATAGAGGCTtgatagcaagcttgcc	0	1	1	0	51	34
693	BG505_gp41_35_C	aggaattctacgctgagtGGCGCGGCGTCAATGACGCTGACGGTACAGGCCAGAAATTTATTATGCGGCATAGTGCAACAGCAAAGCAATTTGCTGAGGGCTATAGAGGCTtgatagcaagcttgcc	3	4	0	4	123	86
694	BG505_gp41_35_Y	aggaattctacgctgagtGGCGCGGCGTCAATGACGCTGACGGTACAGGCCAGAAATTTATTATACGGCATAGTGCAACAGCAAAGCAATTTGCTGAGGGCTATAGAGGCTtgatagcaagcttgcc	0	1	7	0	42	32
695	BG505_gp41_35_L	aggaattctacgctgagtGGCGCGGCGTCAATGACGCTGACGGTACAGGCCAGAAATTTATTACTGGGCATAGTGCAACAGCAAAGCAATTTGCTGAGGGCTATAGAGGCTtgatagcaagcttgcc	1	1	0	0	23	17
696	BG505_gp41_35_F	aggaattctacgctgagtGGCGCGGCGTCAATGACGCTGACGGTACAGGCCAGAAATTTATTATTCGGCATAGTGCAACAGCAAAGCAATTTGCTGAGGGCTATAGAGGCTtgatagcaagcttgcc	3	3	0	32	184	108
697	BG505_gp41_35_Q	aggaattctacgctgagtGGCGCGGCGTCAATGACGCTGACGGTACAGGCCAGAAATTTATTACAGGGCATAGTGCAACAGCAAAGCAATTTGCTGAGGGCTATAGAGGCTtgatagcaagcttgcc	2	0	2	0	111	56
698	BG505_gp41_35_H	aggaattctacgctgagtGGCGCGGCGTCAATGACGCTGACGGTACAGGCCAGAAATTTATTACACGGCATAGTGCAACAGCAAAGCAATTTGCTGAGGGCTATAGAGGCTtgatagcaagcttgcc	5	8	47	0	267	166
699	BG505_gp41_35_P	aggaattctacgctgagtGGCGCGGCGTCAATGACGCTGACGGTACAGGCCAGAAATTTATTACCGGGCATAGTGCAACAGCAAAGCAATTTGCTGAGGGCTATAGAGGCTtgatagcaagcttgcc	1	0	3	0	76	57
700	BG505_gp41_36_G	aggaattctacgctgagtGCGGCGTCAATGACGCTGACGGTACAGGCCAGAAATTTATTATCTGGTATAGTGCAACAGCAAAGCAATTTGCTGAGGGCTATAGAGGCTCAAtgatagcaagcttgcc	2	1	25	2	263	188
701	BG505_gp41_36_E	aggaattctacgctgagtGCGGCGTCAATGACGCTGACGGTACAGGCCAGAAATTTATTATCTGAAATAGTGCAACAGCAAAGCAATTTGCTGAGGGCTATAGAGGCTCAAtgatagcaagcttgcc	1	6	5	12	251	187
702	BG505_gp41_36_D	aggaattctacgctgagtGCGGCGTCAATGACGCTGACGGTACAGGCCAGAAATTTATTATCTGACATAGTGCAACAGCAAAGCAATTTGCTGAGGGCTATAGAGGCTCAAtgatagcaagcttgcc	4	3	28	15	217	146
703	BG505_gp41_36_V	aggaattctacgctgagtGCGGCGTCAATGACGCTGACGGTACAGGCCAGAAATTTATTATCTGTTATAGTGCAACAGCAAAGCAATTTGCTGAGGGCTATAGAGGCTCAAtgatagcaagcttgcc	0	1	0	0	34	31
704	BG505_gp41_36_A	aggaattctacgctgagtGCGGCGTCAATGACGCTGACGGTACAGGCCAGAAATTTATTATCTGCTATAGTGCAACAGCAAAGCAATTTGCTGAGGGCTATAGAGGCTCAAtgatagcaagcttgcc	5	8	64	19	518	392
705	BG505_gp41_36_R	aggaattctacgctgagtGCGGCGTCAATGACGCTGACGGTACAGGCCAGAAATTTATTATCTCGTATAGTGCAACAGCAAAGCAATTTGCTGAGGGCTATAGAGGCTCAAtgatagcaagcttgcc	10	12	16	76	331	217
706	BG505_gp41_36_S	aggaattctacgctgagtGCGGCGTCAATGACGCTGACGGTACAGGCCAGAAATTTATTATCTTCTATAGTGCAACAGCAAAGCAATTTGCTGAGGGCTATAGAGGCTCAAtgatagcaagcttgcc	1	5	8	0	152	130
707	BG505_gp41_36_K	aggaattctacgctgagtGCGGCGTCAATGACGCTGACGGTACAGGCCAGAAATTTATTATCTAAAATAGTGCAACAGCAAAGCAATTTGCTGAGGGCTATAGAGGCTCAAtgatagcaagcttgcc	3	2	5	37	131	102
708	BG505_gp41_36_N	aggaattctacgctgagtGCGGCGTCAATGACGCTGACGGTACAGGCCAGAAATTTATTATCTAACATAGTGCAACAGCAAAGCAATTTGCTGAGGGCTATAGAGGCTCAAtgatagcaagcttgcc	8	6	18	53	365	219
709	BG505_gp41_36_M	aggaattctacgctgagtGCGGCGTCAATGACGCTGACGGTACAGGCCAGAAATTTATTATCTATGATAGTGCAACAGCAAAGCAATTTGCTGAGGGCTATAGAGGCTCAAtgatagcaagcttgcc	1	0	32	1	167	115
710	BG505_gp41_36_I	aggaattctacgctgagtGCGGCGTCAATGACGCTGACGGTACAGGCCAGAAATTTATTATCTATCATAGTGCAACAGCAAAGCAATTTGCTGAGGGCTATAGAGGCTCAAtgatagcaagcttgcc	3	5	6	11	205	138
711	BG505_gp41_36_T	aggaattctacgctgagtGCGGCGTCAATGACGCTGACGGTACAGGCCAGAAATTTATTATCTACCATAGTGCAACAGCAAAGCAATTTGCTGAGGGCTATAGAGGCTCAAtgatagcaagcttgcc	12	2	27	57	488	307
712	BG505_gp41_36_W	aggaattctacgctgagtGCGGCGTCAATGACGCTGACGGTACAGGCCAGAAATTTATTATCTTGGATAGTGCAACAGCAAAGCAATTTGCTGAGGGCTATAGAGGCTCAAtgatagcaagcttgcc	5	2	30	4	159	110
713	BG505_gp41_36_C	aggaattctacgctgagtGCGGCGTCAATGACGCTGACGGTACAGGCCAGAAATTTATTATCTTGCATAGTGCAACAGCAAAGCAATTTGCTGAGGGCTATAGAGGCTCAAtgatagcaagcttgcc	6	4	21	10	193	140
714	BG505_gp41_36_Y	aggaattctacgctgagtGCGGCGTCAATGACGCTGACGGTACAGGCCAGAAATTTATTATCTTACATAGTGCAACAGCAAAGCAATTTGCTGAGGGCTATAGAGGCTCAAtgatagcaagcttgcc	8	4	25	58	437	341
715	BG505_gp41_36_L	aggaattctacgctgagtGCGGCGTCAATGACGCTGACGGTACAGGCCAGAAATTTATTATCTCTGATAGTGCAACAGCAAAGCAATTTGCTGAGGGCTATAGAGGCTCAAtgatagcaagcttgcc	8	5	35	25	252	188
716	BG505_gp41_36_F	aggaattctacgctgagtGCGGCGTCAATGACGCTGACGGTACAGGCCAGAAATTTATTATCTTTCATAGTGCAACAGCAAAGCAATTTGCTGAGGGCTATAGAGGCTCAAtgatagcaagcttgcc	3	8	2	10	259	190
717	BG505_gp41_36_Q	aggaattctacgctgagtGCGGCGTCAATGACGCTGACGGTACAGGCCAGAAATTTATTATCTCAGATAGTGCAACAGCAAAGCAATTTGCTGAGGGCTATAGAGGCTCAAtgatagcaagcttgcc	7	6	7	7	221	141
718	BG505_gp41_36_H	aggaattctacgctgagtGCGGCGTCAATGACGCTGACGGTACAGGCCAGAAATTTATTATCTCACATAGTGCAACAGCAAAGCAATTTGCTGAGGGCTATAGAGGCTCAAtgatagcaagcttgcc	3	4	17	32	325	219
719	BG505_gp41_36_P	aggaattctacgctgagtGCGGCGTCAATGACGCTGACGGTACAGGCCAGAAATTTATTATCTCCGATAGTGCAACAGCAAAGCAATTTGCTGAGGGCTATAGAGGCTCAAtgatagcaagcttgcc	14	10	45	12	547	455
720	BG505_gp41_37_G	aggaattctacgctgagtGCGTCAATGACGCTGACGGTACAGGCCAGAAATTTATTATCTGGCGGTGTGCAACAGCAAAGCAATTTGCTGAGGGCTATAGAGGCTCAACAAtgatagcaagcttgcc	4	9	22	24	528	284
721	BG505_gp41_37_E	aggaattctacgctgagtGCGTCAATGACGCTGACGGTACAGGCCAGAAATTTATTATCTGGCGAAGTGCAACAGCAAAGCAATTTGCTGAGGGCTATAGAGGCTCAACAAtgatagcaagcttgcc	7	3	37	0	442	339
722	BG505_gp41_37_D	aggaattctacgctgagtGCGTCAATGACGCTGACGGTACAGGCCAGAAATTTATTATCTGGCGACGTGCAACAGCAAAGCAATTTGCTGAGGGCTATAGAGGCTCAACAAtgatagcaagcttgcc	6	2	13	4	191	177
723	BG505_gp41_37_V	aggaattctacgctgagtGCGTCAATGACGCTGACGGTACAGGCCAGAAATTTATTATCTGGCGTTGTGCAACAGCAAAGCAATTTGCTGAGGGCTATAGAGGCTCAACAAtgatagcaagcttgcc	0	2	0	11	190	158
724	BG505_gp41_37_A	aggaattctacgctgagtGCGTCAATGACGCTGACGGTACAGGCCAGAAATTTATTATCTGGCGCTGTGCAACAGCAAAGCAATTTGCTGAGGGCTATAGAGGCTCAACAAtgatagcaagcttgcc	7	3	54	1	333	238
725	BG505_gp41_37_R	aggaattctacgctgagtGCGTCAATGACGCTGACGGTACAGGCCAGAAATTTATTATCTGGCCGTGTGCAACAGCAAAGCAATTTGCTGAGGGCTATAGAGGCTCAACAAtgatagcaagcttgcc	3	2	13	0	130	104
726	BG505_gp41_37_S	aggaattctacgctgagtGCGTCAATGACGCTGACGGTACAGGCCAGAAATTTATTATCTGGCTCTGTGCAACAGCAAAGCAATTTGCTGAGGGCTATAGAGGCTCAACAAtgatagcaagcttgcc	2	6	19	3	398	259
727	BG505_gp41_37_K	aggaattctacgctgagtGCGTCAATGACGCTGACGGTACAGGCCAGAAATTTATTATCTGGCAAAGTGCAACAGCAAAGCAATTTGCTGAGGGCTATAGAGGCTCAACAAtgatagcaagcttgcc	1	6	14	55	279	201
728	BG505_gp41_37_N	aggaattctacgctgagtGCGTCAATGACGCTGACGGTACAGGCCAGAAATTTATTATCTGGCAACGTGCAACAGCAAAGCAATTTGCTGAGGGCTATAGAGGCTCAACAAtgatagcaagcttgcc	4	5	38	1	358	330
729	BG505_gp41_37_M	aggaattctacgctgagtGCGTCAATGACGCTGACGGTACAGGCCAGAAATTTATTATCTGGCATGGTGCAACAGCAAAGCAATTTGCTGAGGGCTATAGAGGCTCAACAAtgatagcaagcttgcc	3	8	6	0	178	171
730	BG505_gp41_37_I	aggaattctacgctgagtGCGTCAATGACGCTGACGGTACAGGCCAGAAATTTATTATCTGGCATCGTGCAACAGCAAAGCAATTTGCTGAGGGCTATAGAGGCTCAACAAtgatagcaagcttgcc	4	11	35	32	417	259
731	BG505_gp41_37_T	aggaattctacgctgagtGCGTCAATGACGCTGACGGTACAGGCCAGAAATTTATTATCTGGCACCGTGCAACAGCAAAGCAATTTGCTGAGGGCTATAGAGGCTCAACAAtgatagcaagcttgcc	2	7	6	34	169	120
732	BG505_gp41_37_W	aggaattctacgctgagtGCGTCAATGACGCTGACGGTACAGGCCAGAAATTTATTATCTGGCTGGGTGCAACAGCAAAGCAATTTGCTGAGGGCTATAGAGGCTCAACAAtgatagcaagcttgcc	2	0	0	0	33	24
733	BG505_gp41_37_C	aggaattctacgctgagtGCGTCAATGACGCTGACGGTACAGGCCAGAAATTTATTATCTGGCTGCGTGCAACAGCAAAGCAATTTGCTGAGGGCTATAGAGGCTCAACAAtgatagcaagcttgcc	5	6	4	3	242	143
734	BG505_gp41_37_Y	aggaattctacgctgagtGCGTCAATGACGCTGACGGTACAGGCCAGAAATTTATTATCTGGCTACGTGCAACAGCAAAGCAATTTGCTGAGGGCTATAGAGGCTCAACAAtgatagcaagcttgcc	3	4	24	33	304	210
735	BG505_gp41_37_L	aggaattctacgctgagtGCGTCAATGACGCTGACGGTACAGGCCAGAAATTTATTATCTGGCCTGGTGCAACAGCAAAGCAATTTGCTGAGGGCTATAGAGGCTCAACAAtgatagcaagcttgcc	3	3	51	7	243	200
736	BG505_gp41_37_F	aggaattctacgctgagtGCGTCAATGACGCTGACGGTACAGGCCAGAAATTTATTATCTGGCTTCGTGCAACAGCAAAGCAATTTGCTGAGGGCTATAGAGGCTCAACAAtgatagcaagcttgcc	7	8	24	2	216	157
737	BG505_gp41_37_Q	aggaattctacgctgagtGCGTCAATGACGCTGACGGTACAGGCCAGAAATTTATTATCTGGCCAGGTGCAACAGCAAAGCAATTTGCTGAGGGCTATAGAGGCTCAACAAtgatagcaagcttgcc	4	5	14	0	239	193
738	BG505_gp41_37_H	aggaattctacgctgagtGCGTCAATGACGCTGACGGTACAGGCCAGAAATTTATTATCTGGCCACGTGCAACAGCAAAGCAATTTGCTGAGGGCTATAGAGGCTCAACAAtgatagcaagcttgcc	0	3	3	1	181	127
739	BG505_gp41_37_P	aggaattctacgctgagtGCGTCAATGACGCTGACGGTACAGGCCAGAAATTTATTATCTGGCCCGGTGCAACAGCAAAGCAATTTGCTGAGGGCTATAGAGGCTCAACAAtgatagcaagcttgcc	4	1	20	0	237	160
740	BG505_gp41_38_G	aggaattctacgctgagtTCAATGACGCTGACGGTACAGGCCAGAAATTTATTATCTGGCATAGGTCAACAGCAAAGCAATTTGCTGAGGGCTATAGAGGCTCAACAACATtgatagcaagcttgcc	3	8	8	12	391	306
741	BG505_gp41_38_E	aggaattctacgctgagtTCAATGACGCTGACGGTACAGGCCAGAAATTTATTATCTGGCATAGAACAACAGCAAAGCAATTTGCTGAGGGCTATAGAGGCTCAACAACATtgatagcaagcttgcc	0	5	0	0	129	89
742	BG505_gp41_38_D	aggaattctacgctgagtTCAATGACGCTGACGGTACAGGCCAGAAATTTATTATCTGGCATAGACCAACAGCAAAGCAATTTGCTGAGGGCTATAGAGGCTCAACAACATtgatagcaagcttgcc	3	4	2	0	90	78
743	BG505_gp41_38_V	aggaattctacgctgagtTCAATGACGCTGACGGTACAGGCCAGAAATTTATTATCTGGCATAGTTCAACAGCAAAGCAATTTGCTGAGGGCTATAGAGGCTCAACAACATtgatagcaagcttgcc	2	1	3	13	166	124
744	BG505_gp41_38_A	aggaattctacgctgagtTCAATGACGCTGACGGTACAGGCCAGAAATTTATTATCTGGCATAGCTCAACAGCAAAGCAATTTGCTGAGGGCTATAGAGGCTCAACAACATtgatagcaagcttgcc	1	2	7	9	184	130
745	BG505_gp41_38_R	aggaattctacgctgagtTCAATGACGCTGACGGTACAGGCCAGAAATTTATTATCTGGCATACGTCAACAGCAAAGCAATTTGCTGAGGGCTATAGAGGCTCAACAACATtgatagcaagcttgcc	3	0	9	0	266	191
746	BG505_gp41_38_S	aggaattctacgctgagtTCAATGACGCTGACGGTACAGGCCAGAAATTTATTATCTGGCATATCTCAACAGCAAAGCAATTTGCTGAGGGCTATAGAGGCTCAACAACATtgatagcaagcttgcc	5	5	22	1	146	121
747	BG505_gp41_38_K	aggaattctacgctgagtTCAATGACGCTGACGGTACAGGCCAGAAATTTATTATCTGGCATAAAACAACAGCAAAGCAATTTGCTGAGGGCTATAGAGGCTCAACAACATtgatagcaagcttgcc	2	2	18	1	157	95
748	BG505_gp41_38_N	aggaattctacgctgagtTCAATGACGCTGACGGTACAGGCCAGAAATTTATTATCTGGCATAAACCAACAGCAAAGCAATTTGCTGAGGGCTATAGAGGCTCAACAACATtgatagcaagcttgcc	4	5	13	1	211	123
749	BG505_gp41_38_M	aggaattctacgctgagtTCAATGACGCTGACGGTACAGGCCAGAAATTTATTATCTGGCATAATGCAACAGCAAAGCAATTTGCTGAGGGCTATAGAGGCTCAACAACATtgatagcaagcttgcc	1	1	18	1	154	112
750	BG505_gp41_38_I	aggaattctacgctgagtTCAATGACGCTGACGGTACAGGCCAGAAATTTATTATCTGGCATAATCCAACAGCAAAGCAATTTGCTGAGGGCTATAGAGGCTCAACAACATtgatagcaagcttgcc	5	4	26	15	178	118
751	BG505_gp41_38_T	aggaattctacgctgagtTCAATGACGCTGACGGTACAGGCCAGAAATTTATTATCTGGCATAACCCAACAGCAAAGCAATTTGCTGAGGGCTATAGAGGCTCAACAACATtgatagcaagcttgcc	1	3	3	7	83	56
752	BG505_gp41_38_W	aggaattctacgctgagtTCAATGACGCTGACGGTACAGGCCAGAAATTTATTATCTGGCATATGGCAACAGCAAAGCAATTTGCTGAGGGCTATAGAGGCTCAACAACATtgatagcaagcttgcc	8	6	32	5	198	121
753	BG505_gp41_38_C	aggaattctacgctgagtTCAATGACGCTGACGGTACAGGCCAGAAATTTATTATCTGGCATATGCCAACAGCAAAGCAATTTGCTGAGGGCTATAGAGGCTCAACAACATtgatagcaagcttgcc	1	1	6	5	93	74
754	BG505_gp41_38_Y	aggaattctacgctgagtTCAATGACGCTGACGGTACAGGCCAGAAATTTATTATCTGGCATATACCAACAGCAAAGCAATTTGCTGAGGGCTATAGAGGCTCAACAACATtgatagcaagcttgcc	4	2	32	0	186	117
755	BG505_gp41_38_L	aggaattctacgctgagtTCAATGACGCTGACGGTACAGGCCAGAAATTTATTATCTGGCATACTGCAACAGCAAAGCAATTTGCTGAGGGCTATAGAGGCTCAACAACATtgatagcaagcttgcc	4	4	18	38	217	146
756	BG505_gp41_38_F	aggaattctacgctgagtTCAATGACGCTGACGGTACAGGCCAGAAATTTATTATCTGGCATATTCCAACAGCAAAGCAATTTGCTGAGGGCTATAGAGGCTCAACAACATtgatagcaagcttgcc	3	2	5	0	129	79
757	BG505_gp41_38_Q	aggaattctacgctgagtTCAATGACGCTGACGGTACAGGCCAGAAATTTATTATCTGGCATACAGCAACAGCAAAGCAATTTGCTGAGGGCTATAGAGGCTCAACAACATtgatagcaagcttgcc	4	1	13	0	204	150
758	BG505_gp41_38_H	aggaattctacgctgagtTCAATGACGCTGACGGTACAGGCCAGAAATTTATTATCTGGCATACACCAACAGCAAAGCAATTTGCTGAGGGCTATAGAGGCTCAACAACATtgatagcaagcttgcc	3	0	12	2	175	145
759	BG505_gp41_38_P	aggaattctacgctgagtTCAATGACGCTGACGGTACAGGCCAGAAATTTATTATCTGGCATACCGCAACAGCAAAGCAATTTGCTGAGGGCTATAGAGGCTCAACAACATtgatagcaagcttgcc	6	7	3	46	193	125
760	BG505_gp41_39_G	aggaattctacgctgagtATGACGCTGACGGTACAGGCCAGAAATTTATTATCTGGCATAGTGGGTCAGCAAAGCAATTTGCTGAGGGCTATAGAGGCTCAACAACATCTGtgatagcaagcttgcc	3	1	12	33	231	156
761	BG505_gp41_39_E	aggaattctacgctgagtATGACGCTGACGGTACAGGCCAGAAATTTATTATCTGGCATAGTGGAACAGCAAAGCAATTTGCTGAGGGCTATAGAGGCTCAACAACATCTGtgatagcaagcttgcc	2	4	7	13	277	147
762	BG505_gp41_39_D	aggaattctacgctgagtATGACGCTGACGGTACAGGCCAGAAATTTATTATCTGGCATAGTGGACCAGCAAAGCAATTTGCTGAGGGCTATAGAGGCTCAACAACATCTGtgatagcaagcttgcc	0	6	13	0	199	133
763	BG505_gp41_39_V	aggaattctacgctgagtATGACGCTGACGGTACAGGCCAGAAATTTATTATCTGGCATAGTGGTTCAGCAAAGCAATTTGCTGAGGGCTATAGAGGCTCAACAACATCTGtgatagcaagcttgcc	3	4	0	0	168	158
764	BG505_gp41_39_A	aggaattctacgctgagtATGACGCTGACGGTACAGGCCAGAAATTTATTATCTGGCATAGTGGCTCAGCAAAGCAATTTGCTGAGGGCTATAGAGGCTCAACAACATCTGtgatagcaagcttgcc	5	1	0	11	186	158
765	BG505_gp41_39_R	aggaattctacgctgagtATGACGCTGACGGTACAGGCCAGAAATTTATTATCTGGCATAGTGCGTCAGCAAAGCAATTTGCTGAGGGCTATAGAGGCTCAACAACATCTGtgatagcaagcttgcc	10	12	32	27	430	261
766	BG505_gp41_39_S	aggaattctacgctgagtATGACGCTGACGGTACAGGCCAGAAATTTATTATCTGGCATAGTGTCTCAGCAAAGCAATTTGCTGAGGGCTATAGAGGCTCAACAACATCTGtgatagcaagcttgcc	12	12	15	14	312	206
767	BG505_gp41_39_K	aggaattctacgctgagtATGACGCTGACGGTACAGGCCAGAAATTTATTATCTGGCATAGTGAAACAGCAAAGCAATTTGCTGAGGGCTATAGAGGCTCAACAACATCTGtgatagcaagcttgcc	2	0	8	10	101	84
768	BG505_gp41_39_N	aggaattctacgctgagtATGACGCTGACGGTACAGGCCAGAAATTTATTATCTGGCATAGTGAACCAGCAAAGCAATTTGCTGAGGGCTATAGAGGCTCAACAACATCTGtgatagcaagcttgcc	1	0	1	46	127	86
769	BG505_gp41_39_M	aggaattctacgctgagtATGACGCTGACGGTACAGGCCAGAAATTTATTATCTGGCATAGTGATGCAGCAAAGCAATTTGCTGAGGGCTATAGAGGCTCAACAACATCTGtgatagcaagcttgcc	3	5	7	20	117	101
770	BG505_gp41_39_I	aggaattctacgctgagtATGACGCTGACGGTACAGGCCAGAAATTTATTATCTGGCATAGTGATCCAGCAAAGCAATTTGCTGAGGGCTATAGAGGCTCAACAACATCTGtgatagcaagcttgcc	1	4	6	0	170	128
771	BG505_gp41_39_T	aggaattctacgctgagtATGACGCTGACGGTACAGGCCAGAAATTTATTATCTGGCATAGTGACCCAGCAAAGCAATTTGCTGAGGGCTATAGAGGCTCAACAACATCTGtgatagcaagcttgcc	3	2	10	35	230	138
772	BG505_gp41_39_W	aggaattctacgctgagtATGACGCTGACGGTACAGGCCAGAAATTTATTATCTGGCATAGTGTGGCAGCAAAGCAATTTGCTGAGGGCTATAGAGGCTCAACAACATCTGtgatagcaagcttgcc	1	1	39	0	129	78
773	BG505_gp41_39_C	aggaattctacgctgagtATGACGCTGACGGTACAGGCCAGAAATTTATTATCTGGCATAGTGTGCCAGCAAAGCAATTTGCTGAGGGCTATAGAGGCTCAACAACATCTGtgatagcaagcttgcc	8	4	3	2	137	129
774	BG505_gp41_39_Y	aggaattctacgctgagtATGACGCTGACGGTACAGGCCAGAAATTTATTATCTGGCATAGTGTACCAGCAAAGCAATTTGCTGAGGGCTATAGAGGCTCAACAACATCTGtgatagcaagcttgcc	9	3	20	21	469	305
775	BG505_gp41_39_L	aggaattctacgctgagtATGACGCTGACGGTACAGGCCAGAAATTTATTATCTGGCATAGTGCTGCAGCAAAGCAATTTGCTGAGGGCTATAGAGGCTCAACAACATCTGtgatagcaagcttgcc	3	3	1	33	222	156
776	BG505_gp41_39_F	aggaattctacgctgagtATGACGCTGACGGTACAGGCCAGAAATTTATTATCTGGCATAGTGTTCCAGCAAAGCAATTTGCTGAGGGCTATAGAGGCTCAACAACATCTGtgatagcaagcttgcc	1	2	0	15	147	111
777	BG505_gp41_39_Q	aggaattctacgctgagtATGACGCTGACGGTACAGGCCAGAAATTTATTATCTGGCATAGTGCAGCAGCAAAGCAATTTGCTGAGGGCTATAGAGGCTCAACAACATCTGtgatagcaagcttgcc	1	1	0	0	77	44
778	BG505_gp41_39_H	aggaattctacgctgagtATGACGCTGACGGTACAGGCCAGAAATTTATTATCTGGCATAGTGCACCAGCAAAGCAATTTGCTGAGGGCTATAGAGGCTCAACAACATCTGtgatagcaagcttgcc	2	7	3	32	268	206
779	BG505_gp41_39_P	aggaattctacgctgagtATGACGCTGACGGTACAGGCCAGAAATTTATTATCTGGCATAGTGCCGCAGCAAAGCAATTTGCTGAGGGCTATAGAGGCTCAACAACATCTGtgatagcaagcttgcc	4	3	4	28	191	138
780	BG505_gp41_40_G	aggaattctacgctgagtACGCTGACGGTACAGGCCAGAAATTTATTATCTGGCATAGTGCAAGGTCAAAGCAATTTGCTGAGGGCTATAGAGGCTCAACAACATCTGTTGtgatagcaagcttgcc	2	1	3	0	72	58
781	BG505_gp41_40_E	aggaattctacgctgagtACGCTGACGGTACAGGCCAGAAATTTATTATCTGGCATAGTGCAAGAACAAAGCAATTTGCTGAGGGCTATAGAGGCTCAACAACATCTGTTGtgatagcaagcttgcc	1	0	0	6	74	59
782	BG505_gp41_40_D	aggaattctacgctgagtACGCTGACGGTACAGGCCAGAAATTTATTATCTGGCATAGTGCAAGACCAAAGCAATTTGCTGAGGGCTATAGAGGCTCAACAACATCTGTTGtgatagcaagcttgcc	0	0	2	0	52	23
783	BG505_gp41_40_V	aggaattctacgctgagtACGCTGACGGTACAGGCCAGAAATTTATTATCTGGCATAGTGCAAGTTCAAAGCAATTTGCTGAGGGCTATAGAGGCTCAACAACATCTGTTGtgatagcaagcttgcc	1	0	2	0	46	31
784	BG505_gp41_40_A	aggaattctacgctgagtACGCTGACGGTACAGGCCAGAAATTTATTATCTGGCATAGTGCAAGCTCAAAGCAATTTGCTGAGGGCTATAGAGGCTCAACAACATCTGTTGtgatagcaagcttgcc	1	3	0	0	51	35
785	BG505_gp41_40_R	aggaattctacgctgagtACGCTGACGGTACAGGCCAGAAATTTATTATCTGGCATAGTGCAACGTCAAAGCAATTTGCTGAGGGCTATAGAGGCTCAACAACATCTGTTGtgatagcaagcttgcc	2	2	11	1	143	108
786	BG505_gp41_40_S	aggaattctacgctgagtACGCTGACGGTACAGGCCAGAAATTTATTATCTGGCATAGTGCAATCTCAAAGCAATTTGCTGAGGGCTATAGAGGCTCAACAACATCTGTTGtgatagcaagcttgcc	4	1	18	0	116	69
787	BG505_gp41_40_K	aggaattctacgctgagtACGCTGACGGTACAGGCCAGAAATTTATTATCTGGCATAGTGCAAAAACAAAGCAATTTGCTGAGGGCTATAGAGGCTCAACAACATCTGTTGtgatagcaagcttgcc	1	1	0	0	79	46
788	BG505_gp41_40_N	aggaattctacgctgagtACGCTGACGGTACAGGCCAGAAATTTATTATCTGGCATAGTGCAAAACCAAAGCAATTTGCTGAGGGCTATAGAGGCTCAACAACATCTGTTGtgatagcaagcttgcc	2	0	0	21	55	29
789	BG505_gp41_40_M	aggaattctacgctgagtACGCTGACGGTACAGGCCAGAAATTTATTATCTGGCATAGTGCAAATGCAAAGCAATTTGCTGAGGGCTATAGAGGCTCAACAACATCTGTTGtgatagcaagcttgcc	0	0	0	0	9	12
790	BG505_gp41_40_I	aggaattctacgctgagtACGCTGACGGTACAGGCCAGAAATTTATTATCTGGCATAGTGCAAATCCAAAGCAATTTGCTGAGGGCTATAGAGGCTCAACAACATCTGTTGtgatagcaagcttgcc	0	2	0	0	39	25
791	BG505_gp41_40_T	aggaattctacgctgagtACGCTGACGGTACAGGCCAGAAATTTATTATCTGGCATAGTGCAAACCCAAAGCAATTTGCTGAGGGCTATAGAGGCTCAACAACATCTGTTGtgatagcaagcttgcc	0	0	0	0	42	22
792	BG505_gp41_40_W	aggaattctacgctgagtACGCTGACGGTACAGGCCAGAAATTTATTATCTGGCATAGTGCAATGGCAAAGCAATTTGCTGAGGGCTATAGAGGCTCAACAACATCTGTTGtgatagcaagcttgcc	1	0	23	0	74	52
793	BG505_gp41_40_C	aggaattctacgctgagtACGCTGACGGTACAGGCCAGAAATTTATTATCTGGCATAGTGCAATGCCAAAGCAATTTGCTGAGGGCTATAGAGGCTCAACAACATCTGTTGtgatagcaagcttgcc	0	2	0	0	97	53
794	BG505_gp41_40_Y	aggaattctacgctgagtACGCTGACGGTACAGGCCAGAAATTTATTATCTGGCATAGTGCAATACCAAAGCAATTTGCTGAGGGCTATAGAGGCTCAACAACATCTGTTGtgatagcaagcttgcc	1	0	0	0	41	32
795	BG505_gp41_40_L	aggaattctacgctgagtACGCTGACGGTACAGGCCAGAAATTTATTATCTGGCATAGTGCAACTGCAAAGCAATTTGCTGAGGGCTATAGAGGCTCAACAACATCTGTTGtgatagcaagcttgcc	0	0	0	0	44	32
796	BG505_gp41_40_F	aggaattctacgctgagtACGCTGACGGTACAGGCCAGAAATTTATTATCTGGCATAGTGCAATTCCAAAGCAATTTGCTGAGGGCTATAGAGGCTCAACAACATCTGTTGtgatagcaagcttgcc	1	0	0	0	27	25
797	BG505_gp41_40_Q	aggaattctacgctgagtACGCTGACGGTACAGGCCAGAAATTTATTATCTGGCATAGTGCAACAGCAAAGCAATTTGCTGAGGGCTATAGAGGCTCAACAACATCTGTTGtgatagcaagcttgcc	4	2	0	0	62	39
798	BG505_gp41_40_H	aggaattctacgctgagtACGCTGACGGTACAGGCCAGAAATTTATTATCTGGCATAGTGCAACACCAAAGCAATTTGCTGAGGGCTATAGAGGCTCAACAACATCTGTTGtgatagcaagcttgcc	0	0	11	0	34	20
799	BG505_gp41_40_P	aggaattctacgctgagtACGCTGACGGTACAGGCCAGAAATTTATTATCTGGCATAGTGCAACCGCAAAGCAATTTGCTGAGGGCTATAGAGGCTCAACAACATCTGTTGtgatagcaagcttgcc	2	1	7	0	85	87
800	BG505_gp41_41_G	aggaattctacgctgagtCTGACGGTACAGGCCAGAAATTTATTATCTGGCATAGTGCAACAGGGTAGCAATTTGCTGAGGGCTATAGAGGCTCAACAACATCTGTTGAAAtgatagcaagcttgcc	1	1	0	9	112	94
801	BG505_gp41_41_E	aggaattctacgctgagtCTGACGGTACAGGCCAGAAATTTATTATCTGGCATAGTGCAACAGGAAAGCAATTTGCTGAGGGCTATAGAGGCTCAACAACATCTGTTGAAAtgatagcaagcttgcc	0	0	0	0	17	22
802	BG505_gp41_41_D	aggaattctacgctgagtCTGACGGTACAGGCCAGAAATTTATTATCTGGCATAGTGCAACAGGACAGCAATTTGCTGAGGGCTATAGAGGCTCAACAACATCTGTTGAAAtgatagcaagcttgcc	1	1	0	0	18	21
803	BG505_gp41_41_V	aggaattctacgctgagtCTGACGGTACAGGCCAGAAATTTATTATCTGGCATAGTGCAACAGGTTAGCAATTTGCTGAGGGCTATAGAGGCTCAACAACATCTGTTGAAAtgatagcaagcttgcc	1	0	4	0	101	58
804	BG505_gp41_41_A	aggaattctacgctgagtCTGACGGTACAGGCCAGAAATTTATTATCTGGCATAGTGCAACAGGCTAGCAATTTGCTGAGGGCTATAGAGGCTCAACAACATCTGTTGAAAtgatagcaagcttgcc	1	2	1	0	8	17
805	BG505_gp41_41_R	aggaattctacgctgagtCTGACGGTACAGGCCAGAAATTTATTATCTGGCATAGTGCAACAGCGTAGCAATTTGCTGAGGGCTATAGAGGCTCAACAACATCTGTTGAAAtgatagcaagcttgcc	2	2	6	0	39	33
806	BG505_gp41_41_S	aggaattctacgctgagtCTGACGGTACAGGCCAGAAATTTATTATCTGGCATAGTGCAACAGTCTAGCAATTTGCTGAGGGCTATAGAGGCTCAACAACATCTGTTGAAAtgatagcaagcttgcc	0	3	4	0	55	57
807	BG505_gp41_41_K	aggaattctacgctgagtCTGACGGTACAGGCCAGAAATTTATTATCTGGCATAGTGCAACAGAAAAGCAATTTGCTGAGGGCTATAGAGGCTCAACAACATCTGTTGAAAtgatagcaagcttgcc	0	3	5	2	31	36
808	BG505_gp41_41_N	aggaattctacgctgagtCTGACGGTACAGGCCAGAAATTTATTATCTGGCATAGTGCAACAGAACAGCAATTTGCTGAGGGCTATAGAGGCTCAACAACATCTGTTGAAAtgatagcaagcttgcc	1	1	0	4	34	41
809	BG505_gp41_41_M	aggaattctacgctgagtCTGACGGTACAGGCCAGAAATTTATTATCTGGCATAGTGCAACAGATGAGCAATTTGCTGAGGGCTATAGAGGCTCAACAACATCTGTTGAAAtgatagcaagcttgcc	0	0	0	0	37	43
810	BG505_gp41_41_I	aggaattctacgctgagtCTGACGGTACAGGCCAGAAATTTATTATCTGGCATAGTGCAACAGATCAGCAATTTGCTGAGGGCTATAGAGGCTCAACAACATCTGTTGAAAtgatagcaagcttgcc	0	0	11	0	23	20
811	BG505_gp41_41_T	aggaattctacgctgagtCTGACGGTACAGGCCAGAAATTTATTATCTGGCATAGTGCAACAGACCAGCAATTTGCTGAGGGCTATAGAGGCTCAACAACATCTGTTGAAAtgatagcaagcttgcc	2	2	10	0	151	86
812	BG505_gp41_41_W	aggaattctacgctgagtCTGACGGTACAGGCCAGAAATTTATTATCTGGCATAGTGCAACAGTGGAGCAATTTGCTGAGGGCTATAGAGGCTCAACAACATCTGTTGAAAtgatagcaagcttgcc	0	1	0	0	58	43
813	BG505_gp41_41_C	aggaattctacgctgagtCTGACGGTACAGGCCAGAAATTTATTATCTGGCATAGTGCAACAGTGCAGCAATTTGCTGAGGGCTATAGAGGCTCAACAACATCTGTTGAAAtgatagcaagcttgcc	0	1	3	7	16	15
814	BG505_gp41_41_Y	aggaattctacgctgagtCTGACGGTACAGGCCAGAAATTTATTATCTGGCATAGTGCAACAGTACAGCAATTTGCTGAGGGCTATAGAGGCTCAACAACATCTGTTGAAAtgatagcaagcttgcc	2	1	0	0	48	38
815	BG505_gp41_41_L	aggaattctacgctgagtCTGACGGTACAGGCCAGAAATTTATTATCTGGCATAGTGCAACAGCTGAGCAATTTGCTGAGGGCTATAGAGGCTCAACAACATCTGTTGAAAtgatagcaagcttgcc	0	0	5	0	52	27
816	BG505_gp41_41_F	aggaattctacgctgagtCTGACGGTACAGGCCAGAAATTTATTATCTGGCATAGTGCAACAGTTCAGCAATTTGCTGAGGGCTATAGAGGCTCAACAACATCTGTTGAAAtgatagcaagcttgcc	1	0	8	0	48	58
817	BG505_gp41_41_Q	aggaattctacgctgagtCTGACGGTACAGGCCAGAAATTTATTATCTGGCATAGTGCAACAGCAGAGCAATTTGCTGAGGGCTATAGAGGCTCAACAACATCTGTTGAAAtgatagcaagcttgcc	1	2	2	3	42	37
818	BG505_gp41_41_H	aggaattctacgctgagtCTGACGGTACAGGCCAGAAATTTATTATCTGGCATAGTGCAACAGCACAGCAATTTGCTGAGGGCTATAGAGGCTCAACAACATCTGTTGAAAtgatagcaagcttgcc	2	0	10	7	59	82
819	BG505_gp41_41_P	aggaattctacgctgagtCTGACGGTACAGGCCAGAAATTTATTATCTGGCATAGTGCAACAGCCGAGCAATTTGCTGAGGGCTATAGAGGCTCAACAACATCTGTTGAAAtgatagcaagcttgcc	2	4	4	0	102	86
820	BG505_gp41_42_G	aggaattctacgctgagtACGGTACAGGCCAGAAATTTATTATCTGGCATAGTGCAACAGCAAGGTAATTTGCTGAGGGCTATAGAGGCTCAACAACATCTGTTGAAACTCtgatagcaagcttgcc	2	2	15	2	309	232
821	BG505_gp41_42_E	aggaattctacgctgagtACGGTACAGGCCAGAAATTTATTATCTGGCATAGTGCAACAGCAAGAAAATTTGCTGAGGGCTATAGAGGCTCAACAACATCTGTTGAAACTCtgatagcaagcttgcc	0	0	5	0	20	25
822	BG505_gp41_42_D	aggaattctacgctgagtACGGTACAGGCCAGAAATTTATTATCTGGCATAGTGCAACAGCAAGACAATTTGCTGAGGGCTATAGAGGCTCAACAACATCTGTTGAAACTCtgatagcaagcttgcc	1	0	0	0	47	39
823	BG505_gp41_42_V	aggaattctacgctgagtACGGTACAGGCCAGAAATTTATTATCTGGCATAGTGCAACAGCAAGTTAATTTGCTGAGGGCTATAGAGGCTCAACAACATCTGTTGAAACTCtgatagcaagcttgcc	2	2	2	0	68	45
824	BG505_gp41_42_A	aggaattctacgctgagtACGGTACAGGCCAGAAATTTATTATCTGGCATAGTGCAACAGCAAGCTAATTTGCTGAGGGCTATAGAGGCTCAACAACATCTGTTGAAACTCtgatagcaagcttgcc	4	2	3	0	90	72
825	BG505_gp41_42_R	aggaattctacgctgagtACGGTACAGGCCAGAAATTTATTATCTGGCATAGTGCAACAGCAACGTAATTTGCTGAGGGCTATAGAGGCTCAACAACATCTGTTGAAACTCtgatagcaagcttgcc	4	0	3	0	77	70
826	BG505_gp41_42_S	aggaattctacgctgagtACGGTACAGGCCAGAAATTTATTATCTGGCATAGTGCAACAGCAATCTAATTTGCTGAGGGCTATAGAGGCTCAACAACATCTGTTGAAACTCtgatagcaagcttgcc	0	2	6	0	50	48
827	BG505_gp41_42_K	aggaattctacgctgagtACGGTACAGGCCAGAAATTTATTATCTGGCATAGTGCAACAGCAAAAAAATTTGCTGAGGGCTATAGAGGCTCAACAACATCTGTTGAAACTCtgatagcaagcttgcc	0	0	20	7	65	63
828	BG505_gp41_42_N	aggaattctacgctgagtACGGTACAGGCCAGAAATTTATTATCTGGCATAGTGCAACAGCAAAACAATTTGCTGAGGGCTATAGAGGCTCAACAACATCTGTTGAAACTCtgatagcaagcttgcc	1	0	0	5	18	15
829	BG505_gp41_42_M	aggaattctacgctgagtACGGTACAGGCCAGAAATTTATTATCTGGCATAGTGCAACAGCAAATGAATTTGCTGAGGGCTATAGAGGCTCAACAACATCTGTTGAAACTCtgatagcaagcttgcc	1	2	0	5	57	33
830	BG505_gp41_42_I	aggaattctacgctgagtACGGTACAGGCCAGAAATTTATTATCTGGCATAGTGCAACAGCAAATCAATTTGCTGAGGGCTATAGAGGCTCAACAACATCTGTTGAAACTCtgatagcaagcttgcc	2	0	9	0	55	51
831	BG505_gp41_42_T	aggaattctacgctgagtACGGTACAGGCCAGAAATTTATTATCTGGCATAGTGCAACAGCAAACCAATTTGCTGAGGGCTATAGAGGCTCAACAACATCTGTTGAAACTCtgatagcaagcttgcc	1	1	2	4	52	31
832	BG505_gp41_42_W	aggaattctacgctgagtACGGTACAGGCCAGAAATTTATTATCTGGCATAGTGCAACAGCAATGGAATTTGCTGAGGGCTATAGAGGCTCAACAACATCTGTTGAAACTCtgatagcaagcttgcc	0	1	5	0	107	64
833	BG505_gp41_42_C	aggaattctacgctgagtACGGTACAGGCCAGAAATTTATTATCTGGCATAGTGCAACAGCAATGCAATTTGCTGAGGGCTATAGAGGCTCAACAACATCTGTTGAAACTCtgatagcaagcttgcc	1	1	0	10	81	35
834	BG505_gp41_42_Y	aggaattctacgctgagtACGGTACAGGCCAGAAATTTATTATCTGGCATAGTGCAACAGCAATACAATTTGCTGAGGGCTATAGAGGCTCAACAACATCTGTTGAAACTCtgatagcaagcttgcc	0	0	4	0	46	33
835	BG505_gp41_42_L	aggaattctacgctgagtACGGTACAGGCCAGAAATTTATTATCTGGCATAGTGCAACAGCAACTGAATTTGCTGAGGGCTATAGAGGCTCAACAACATCTGTTGAAACTCtgatagcaagcttgcc	2	1	2	2	79	57
836	BG505_gp41_42_F	aggaattctacgctgagtACGGTACAGGCCAGAAATTTATTATCTGGCATAGTGCAACAGCAATTCAATTTGCTGAGGGCTATAGAGGCTCAACAACATCTGTTGAAACTCtgatagcaagcttgcc	0	2	0	0	158	98
837	BG505_gp41_42_Q	aggaattctacgctgagtACGGTACAGGCCAGAAATTTATTATCTGGCATAGTGCAACAGCAACAGAATTTGCTGAGGGCTATAGAGGCTCAACAACATCTGTTGAAACTCtgatagcaagcttgcc	2	1	0	0	60	48
838	BG505_gp41_42_H	aggaattctacgctgagtACGGTACAGGCCAGAAATTTATTATCTGGCATAGTGCAACAGCAACACAATTTGCTGAGGGCTATAGAGGCTCAACAACATCTGTTGAAACTCtgatagcaagcttgcc	0	0	0	0	46	29
839	BG505_gp41_42_P	aggaattctacgctgagtACGGTACAGGCCAGAAATTTATTATCTGGCATAGTGCAACAGCAACCGAATTTGCTGAGGGCTATAGAGGCTCAACAACATCTGTTGAAACTCtgatagcaagcttgcc	0	1	0	0	61	49
840	BG505_gp41_43_G	aggaattctacgctgagtGTACAGGCCAGAAATTTATTATCTGGCATAGTGCAACAGCAAAGCGGTTTGCTGAGGGCTATAGAGGCTCAACAACATCTGTTGAAACTCACGtgatagcaagcttgcc	4	7	10	32	304	244
841	BG505_gp41_43_E	aggaattctacgctgagtGTACAGGCCAGAAATTTATTATCTGGCATAGTGCAACAGCAAAGCGAATTGCTGAGGGCTATAGAGGCTCAACAACATCTGTTGAAACTCACGtgatagcaagcttgcc	2	0	0	8	88	47
842	BG505_gp41_43_D	aggaattctacgctgagtGTACAGGCCAGAAATTTATTATCTGGCATAGTGCAACAGCAAAGCGACTTGCTGAGGGCTATAGAGGCTCAACAACATCTGTTGAAACTCACGtgatagcaagcttgcc	2	1	3	0	100	61
843	BG505_gp41_43_V	aggaattctacgctgagtGTACAGGCCAGAAATTTATTATCTGGCATAGTGCAACAGCAAAGCGTTTTGCTGAGGGCTATAGAGGCTCAACAACATCTGTTGAAACTCACGtgatagcaagcttgcc	2	1	12	0	131	98
844	BG505_gp41_43_A	aggaattctacgctgagtGTACAGGCCAGAAATTTATTATCTGGCATAGTGCAACAGCAAAGCGCTTTGCTGAGGGCTATAGAGGCTCAACAACATCTGTTGAAACTCACGtgatagcaagcttgcc	1	1	5	0	78	35
845	BG505_gp41_43_R	aggaattctacgctgagtGTACAGGCCAGAAATTTATTATCTGGCATAGTGCAACAGCAAAGCCGTTTGCTGAGGGCTATAGAGGCTCAACAACATCTGTTGAAACTCACGtgatagcaagcttgcc	0	1	6	15	172	127
846	BG505_gp41_43_S	aggaattctacgctgagtGTACAGGCCAGAAATTTATTATCTGGCATAGTGCAACAGCAAAGCTCTTTGCTGAGGGCTATAGAGGCTCAACAACATCTGTTGAAACTCACGtgatagcaagcttgcc	2	10	0	0	82	46
847	BG505_gp41_43_K	aggaattctacgctgagtGTACAGGCCAGAAATTTATTATCTGGCATAGTGCAACAGCAAAGCAAATTGCTGAGGGCTATAGAGGCTCAACAACATCTGTTGAAACTCACGtgatagcaagcttgcc	4	3	8	23	173	127
848	BG505_gp41_43_N	aggaattctacgctgagtGTACAGGCCAGAAATTTATTATCTGGCATAGTGCAACAGCAAAGCAACTTGCTGAGGGCTATAGAGGCTCAACAACATCTGTTGAAACTCACGtgatagcaagcttgcc	1	3	0	1	135	104
849	BG505_gp41_43_M	aggaattctacgctgagtGTACAGGCCAGAAATTTATTATCTGGCATAGTGCAACAGCAAAGCATGTTGCTGAGGGCTATAGAGGCTCAACAACATCTGTTGAAACTCACGtgatagcaagcttgcc	2	1	14	10	99	59
850	BG505_gp41_43_I	aggaattctacgctgagtGTACAGGCCAGAAATTTATTATCTGGCATAGTGCAACAGCAAAGCATCTTGCTGAGGGCTATAGAGGCTCAACAACATCTGTTGAAACTCACGtgatagcaagcttgcc	2	3	1	6	195	133
851	BG505_gp41_43_T	aggaattctacgctgagtGTACAGGCCAGAAATTTATTATCTGGCATAGTGCAACAGCAAAGCACCTTGCTGAGGGCTATAGAGGCTCAACAACATCTGTTGAAACTCACGtgatagcaagcttgcc	2	2	3	9	148	98
852	BG505_gp41_43_W	aggaattctacgctgagtGTACAGGCCAGAAATTTATTATCTGGCATAGTGCAACAGCAAAGCTGGTTGCTGAGGGCTATAGAGGCTCAACAACATCTGTTGAAACTCACGtgatagcaagcttgcc	2	0	12	17	75	52
853	BG505_gp41_43_C	aggaattctacgctgagtGTACAGGCCAGAAATTTATTATCTGGCATAGTGCAACAGCAAAGCTGCTTGCTGAGGGCTATAGAGGCTCAACAACATCTGTTGAAACTCACGtgatagcaagcttgcc	0	0	0	0	13	1
854	BG505_gp41_43_Y	aggaattctacgctgagtGTACAGGCCAGAAATTTATTATCTGGCATAGTGCAACAGCAAAGCTACTTGCTGAGGGCTATAGAGGCTCAACAACATCTGTTGAAACTCACGtgatagcaagcttgcc	3	2	7	0	85	67
855	BG505_gp41_43_L	aggaattctacgctgagtGTACAGGCCAGAAATTTATTATCTGGCATAGTGCAACAGCAAAGCCTGTTGCTGAGGGCTATAGAGGCTCAACAACATCTGTTGAAACTCACGtgatagcaagcttgcc	4	4	15	26	100	81
856	BG505_gp41_43_F	aggaattctacgctgagtGTACAGGCCAGAAATTTATTATCTGGCATAGTGCAACAGCAGAGCTTCTTGCTGAGGGCTATAGAGGCTCAACAACATCTGTTGAAACTCACGtgatagcaagcttgcc	2	2	11	1	73	64
857	BG505_gp41_43_Q	aggaattctacgctgagtGTACAGGCCAGAAATTTATTATCTGGCATAGTGCAACAGCAAAGCCAGTTGCTGAGGGCTATAGAGGCTCAACAACATCTGTTGAAACTCACGtgatagcaagcttgcc	7	6	1	0	208	158
858	BG505_gp41_43_H	aggaattctacgctgagtGTACAGGCCAGAAATTTATTATCTGGCATAGTGCAACAGCAAAGCCACTTGCTGAGGGCTATAGAGGCTCAACAACATCTGTTGAAACTCACGtgatagcaagcttgcc	1	1	3	2	59	22
859	BG505_gp41_43_P	aggaattctacgctgagtGTACAGGCCAGAAATTTATTATCTGGCATAGTGCAACAGCAAAGCCCGTTGCTGAGGGCTATAGAGGCTCAACAACATCTGTTGAAACTCACGtgatagcaagcttgcc	2	4	19	2	249	189
860	BG505_gp41_44_G	aggaattctacgctgagtCAGGCCAGAAATTTATTATCTGGCATAGTGCAACAGCAAAGCAATGGTCTGAGGGCTATAGAGGCTCAACAACATCTGTTGAAACTCACGGTCtgatagcaagcttgcc	2	7	3	9	147	147
861	BG505_gp41_44_E	aggaattctacgctgagtCAGGCCAGAAATTTATTATCTGGCATAGTGCAACAGCAAAGCAATGAACTGAGGGCTATAGAGGCTCAACAACATCTGTTGAAACTCACGGTCtgatagcaagcttgcc	2	3	12	2	217	165
862	BG505_gp41_44_D	aggaattctacgctgagtCAGGCCAGAAATTTATTATCTGGCATAGTGCAACAGCAAAGCAATGACCTGAGGGCTATAGAGGCTCAACAACATCTGTTGAAACTCACGGTCtgatagcaagcttgcc	5	2	21	11	277	217
863	BG505_gp41_44_V	aggaattctacgctgagtCAGGCCAGAAATTTATTATCTGGCATAGTGCAACAGCAAAGCAATGTTCTGAGGGCTATAGAGGCTCAACAACATCTGTTGAAACTCACGGTCtgatagcaagcttgcc	2	3	7	0	180	109
864	BG505_gp41_44_A	aggaattctacgctgagtCAGGCCAGAAATTTATTATCTGGCATAGTGCAACAGCAAAGCAATGCTCTGAGGGCTATAGAGGCTCAACAACATCTGTTGAAACTCACGGTCtgatagcaagcttgcc	5	6	1	7	204	146
865	BG505_gp41_44_R	aggaattctacgctgagtCAGGCCAGAAATTTATTATCTGGCATAGTGCAACAGCAAAGCAATCGTCTGAGGGCTATAGAGGCTCAACAACATCTGTTGAAACTCACGGTCtgatagcaagcttgcc	7	4	27	9	386	386
866	BG505_gp41_44_S	aggaattctacgctgagtCAGGCCAGAAATTTATTATCTGGCATAGTGCAACAGCAAAGCAATTCTCTGAGGGCTATAGAGGCTCAACAACATCTGTTGAAACTCACGGTCtgatagcaagcttgcc	4	3	13	24	226	150
867	BG505_gp41_44_K	aggaattctacgctgagtCAGGCCAGAAATTTATTATCTGGCATAGTGCAACAGCAAAGCAATAAACTGAGGGCTATAGAGGCTCAACAACATCTGTTGAAACTCACGGTCtgatagcaagcttgcc	9	14	25	24	402	291
868	BG505_gp41_44_N	aggaattctacgctgagtCAGGCCAGAAATTTATTATCTGGCATAGTGCAACAGCAAAGCAATAACCTGAGGGCTATAGAGGCTCAACAACATCTGTTGAAACTCACGGTCtgatagcaagcttgcc	2	0	0	0	100	84
869	BG505_gp41_44_M	aggaattctacgctgagtCAGGCCAGAAATTTATTATCTGGCATAGTGCAACAGCAAAGCAATATGCTGAGGGCTATAGAGGCTCAACAACATCTGTTGAAACTCACGGTCtgatagcaagcttgcc	4	2	8	16	176	132
870	BG505_gp41_44_I	aggaattctacgctgagtCAGGCCAGAAATTTATTATCTGGCATAGTGCAACAGCAAAGCAATATCCTGAGGGCTATAGAGGCTCAACAACATCTGTTGAAACTCACGGTCtgatagcaagcttgcc	3	5	15	1	264	174
871	BG505_gp41_44_T	aggaattctacgctgagtCAGGCCAGAAATTTATTATCTGGCATAGTGCAACAGCAAAGCAATACCCTGAGGGCTATAGAGGCTCAACAACATCTGTTGAAACTCACGGTCtgatagcaagcttgcc	3	2	14	0	161	117
872	BG505_gp41_44_W	aggaattctacgctgagtCAGGCCAGAAATTTATTATCTGGCATAGTGCAACAGCAAAGCAATTGGCTGAGGGCTATAGAGGCTCAACAACATCTGTTGAAACTCACGGTCtgatagcaagcttgcc	4	5	12	15	339	264
873	BG505_gp41_44_C	aggaattctacgctgagtCAGGCCAGAAATTTATTATCTGGCATAGTGCAACAGCAAAGCAATTGCCTGAGGGCTATAGAGGCTCAACAACATCTGTTGAAACTCACGGTCtgatagcaagcttgcc	2	7	25	0	193	142
874	BG505_gp41_44_Y	aggaattctacgctgagtCAGGCCAGAAATTTATTATCTGGCATAGTGCAACAGCAAAGCAATTACCTGAGGGCTATAGAGGCTCAACAACATCTGTTGAAACTCACGGTCtgatagcaagcttgcc	7	2	23	7	220	134
875	BG505_gp41_44_L	aggaattctacgctgagtCAGGCCAGAAATTTATTATCTGGCATAGTGCAACAGCAAAGCAATCTGCTGAGGGCTATAGAGGCTCAACAACATCTGTTGAAACTCACGGTCtgatagcaagcttgcc	0	4	8	0	163	142
876	BG505_gp41_44_F	aggaattctacgctgagtCAGGCCAGAAATTTATTATCTGGCATAGTGCAACAGCAAAGCAATTTCCTGAGGGCTATAGAGGCTCAACAACATCTGTTGAAACTCACGGTCtgatagcaagcttgcc	4	3	13	1	362	232
877	BG505_gp41_44_Q	aggaattctacgctgagtCAGGCCAGAAATTTATTATCTGGCATAGTGCAACAGCAAAGCAATCAGCTGAGGGCTATAGAGGCTCAACAACATCTGTTGAAACTCACGGTCtgatagcaagcttgcc	5	9	7	0	222	178
878	BG505_gp41_44_H	aggaattctacgctgagtCAGGCCAGAAATTTATTATCTGGCATAGTGCAACAGCAAAGCAATCACCTGAGGGCTATAGAGGCTCAACAACATCTGTTGAAACTCACGGTCtgatagcaagcttgcc	1	1	14	0	104	67
879	BG505_gp41_44_P	aggaattctacgctgagtCAGGCCAGAAATTTATTATCTGGCATAGTGCAACAGCAAAGCAATCCGCTGAGGGCTATAGAGGCTCAACAACATCTGTTGAAACTCACGGTCtgatagcaagcttgcc	4	6	6	0	339	229
880	BG505_gp41_45_G	aggaattctacgctgagtGCCAGAAATTTATTATCTGGCATAGTGCAACAGCAAAGCAATTTGGGTAGGGCTATAGAGGCTCAACAACATCTGTTGAAACTCACGGTCTGGtgatagcaagcttgcc	0	0	8	0	77	45
881	BG505_gp41_45_E	aggaattctacgctgagtGCCAGAAATTTATTATCTGGCATAGTGCAACAGCAAAGCAATTTGGAAAGGGCTATAGAGGCTCAACAACATCTGTTGAAACTCACGGTCTGGtgatagcaagcttgcc	6	1	2	18	171	126
882	BG505_gp41_45_D	aggaattctacgctgagtGCCAGAAATTTATTATCTGGCATAGTGCAACAGCAAAGCAATTTGGACAGGGCTATAGAGGCTCAACAACATCTGTTGAAACTCACGGTCTGGtgatagcaagcttgcc	3	5	2	12	169	131
883	BG505_gp41_45_V	aggaattctacgctgagtGCCAGAAATTTATTATCTGGCATAGTGCAACAGCAAAGCAATTTGGTTAGGGCTATAGAGGCTCAACAACATCTGTTGAAACTCACGGTCTGGtgatagcaagcttgcc	1	14	55	13	501	354
884	BG505_gp41_45_A	aggaattctacgctgagtGCCAGAAATTTATTATCTGGCATAGTGCAACAGCAAAGCAATTTGGCTAGGGCTATAGAGGCTCAACAACATCTGTTGAAACTCACGGTCTGGtgatagcaagcttgcc	2	1	5	1	116	61
885	BG505_gp41_45_R	aggaattctacgctgagtGCCAGAAATTTATTATCTGGCATAGTGCAACAGCAAAGCAATTTGCGTAGGGCTATAGAGGCTCAACAACATCTGTTGAAACTCACGGTCTGGtgatagcaagcttgcc	3	1	3	0	103	74
886	BG505_gp41_45_S	aggaattctacgctgagtGCCAGAAATTTATTATCTGGCATAGTGCAACAGCAAAGCAATTTGTCTAGGGCTATAGAGGCTCAACAACATCTGTTGAAACTCACGGTCTGGtgatagcaagcttgcc	3	3	3	21	233	181
887	BG505_gp41_45_K	aggaattctacgctgagtGCCAGAAATTTATTATCTGGCATAGTGCAACAGCAAAGCAATTTGAAAAGGGCTATAGAGGCTCAACAACATCTGTTGAAACTCACGGTCTGGtgatagcaagcttgcc	7	5	53	0	250	212
888	BG505_gp41_45_N	aggaattctacgctgagtGCCAGAAATTTATTATCTGGCATAGTGCAACAGCAAAGCAATTTGAACAGGGCTATAGAGGCTCAACAACATCTGTTGAAACTCACGGTCTGGtgatagcaagcttgcc	2	1	12	0	151	93
889	BG505_gp41_45_M	aggaattctacgctgagtGCCAGAAATTTATTATCTGGCATAGTGCAACAGCAAAGCAATTTGATGAGGGCTATAGAGGCTCAACAACATCTGTTGAAACTCACGGTCTGGtgatagcaagcttgcc	0	2	16	17	101	64
890	BG505_gp41_45_I	aggaattctacgctgagtGCCAGAAATTTATTATCTGGCATAGTGCAACAGCAAAGCAATTTGATCAGGGCTATAGAGGCTCAACAACATCTGTTGAAACTCACGGTCTGGtgatagcaagcttgcc	4	5	0	2	94	78
891	BG505_gp41_45_T	aggaattctacgctgagtGCCAGAAATTTATTATCTGGCATAGTGCAACAGCAAAGCAATTTGACCAGGGCTATAGAGGCTCAACAACATCTGTTGAAACTCACGGTCTGGtgatagcaagcttgcc	6	4	26	0	305	244
892	BG505_gp41_45_W	aggaattctacgctgagtGCCAGAAATTTATTATCTGGCATAGTGCAACAGCAAAGCAATTTGTGGAGGGCTATAGAGGCTCAACAACATCTGTTGAAACTCACGGTCTGGtgatagcaagcttgcc	4	5	4	23	188	144
893	BG505_gp41_45_C	aggaattctacgctgagtGCCAGAAATTTATTATCTGGCATAGTGCAACAGCAAAGCAATTTGTGCAGGGCTATAGAGGCTCAACAACATCTGTTGAAACTCACGGTCTGGtgatagcaagcttgcc	1	3	4	0	111	78
894	BG505_gp41_45_Y	aggaattctacgctgagtGCCAGAAATTTATTATCTGGCATAGTGCAACAGCAAAGCAATTTGTACAGGGCTATAGAGGCTCAACAACATCTGTTGAAACTCACGGTCTGGtgatagcaagcttgcc	2	1	0	4	146	126
895	BG505_gp41_45_L	aggaattctacgctgagtGCCAGAAATTTATTATCTGGCATAGTGCAACAGCAAAGCAATTTGCTGAGGGCTATAGAGGCTCAACAACATCTGTTGAAACTCACGGTCTGGtgatagcaagcttgcc	2	1	2	7	93	72
896	BG505_gp41_45_F	aggaattctacgctgagtGCCAGAAATTTATTATCTGGCATAGTGCAACAGCAAAGCAATTTGTTCAGGGCTATAGAGGCTCAACAACATCTGTTGAAACTCACGGTCTGGtgatagcaagcttgcc	6	8	1	20	233	192
897	BG505_gp41_45_Q	aggaattctacgctgagtGCCAGAAATTTATTATCTGGCATAGTGCAACAGCAAAGCAATTTGCAGAGGGCTATAGAGGCTCAACAACATCTGTTGAAACTCACGGTCTGGtgatagcaagcttgcc	1	1	3	0	41	26
898	BG505_gp41_45_H	aggaattctacgctgagtGCCAGAAATTTATTATCTGGCATAGTGCAACAGCAAAGCAATTTGCACAGGGCTATAGAGGCTCAACAACATCTGTTGAAACTCACGGTCTGGtgatagcaagcttgcc	0	2	33	29	123	80
899	BG505_gp41_45_P	aggaattctacgctgagtGCCAGAAATTTATTATCTGGCATAGTGCAACAGCAAAGCAATTTGCCGAGGGCTATAGAGGCTCAACAACATCTGTTGAAACTCACGGTCTGGtgatagcaagcttgcc	5	4	14	8	360	293
900	BG505_gp41_46_G	aggaattctacgctgagtAGAAATTTATTATCTGGCATAGTGCAACAGCAAAGCAATTTGCTGGGTGCTATAGAGGCTCAACAACATCTGTTGAAACTCACGGTCTGGGGCtgatagcaagcttgcc	0	0	0	0	0	0
901	BG505_gp41_46_E	aggaattctacgctgagtAGAAATTTATTATCTGGCATAGTGCAACAGCAAAGCAATTTGCTGGAAGCTATAGAGGCTCAACAACATCTGTTGAAACTCACGGTCTGGGGCtgatagcaagcttgcc	0	0	0	0	0	0
902	BG505_gp41_46_D	aggaattctacgctgagtAGAAATTTATTATCTGGCATAGTGCAACAGCAAAGCAATTTGCTGGACGCTATAGAGGCTCAACAACATCTGTTGAAACTCACGGTCTGGGGCtgatagcaagcttgcc	0	0	0	0	0	0
903	BG505_gp41_46_V	aggaattctacgctgagtAGAAATTTATTATCTGGCATAGTGCAACAGCAAAGCAATTTGCTGGTTGCTATAGAGGCTCAACAACATCTGTTGAAACTCACGGTCTGGGGCtgatagcaagcttgcc	0	0	0	0	0	0
904	BG505_gp41_46_A	aggaattctacgctgagtAGAAATTTATTATCTGGCATAGTGCAACAGCAAAGCAATTTGCTGGCTGCTATAGAGGCTCAACAACATCTGTTGAAACTCACGGTCTGGGGCtgatagcaagcttgcc	0	0	0	0	1	0
905	BG505_gp41_46_R	aggaattctacgctgagtAGAAATTTATTATCTGGCATAGTGCAACAGCAAAGCAATTTGCTGCGTGCTATAGAGGCTCAACAACATCTGTTGAAACTCACGGTCTGGGGCtgatagcaagcttgcc	0	0	0	0	2	0
906	BG505_gp41_46_S	aggaattctacgctgagtAGAAATTTATTATCTGGCATAGTGCAACAGCAAAGCAATTTGCTGTCTGCTATAGAGGCTCAACAACATCTGTTGAAACTCACGGTCTGGGGCtgatagcaagcttgcc	0	0	0	0	2	0
907	BG505_gp41_46_K	aggaattctacgctgagtAGAAATTTATTATCTGGCATAGTGCAACAGCAAAGCAATTTGCTGAAAGCTATAGAGGCTCAACAACATCTGTTGAAACTCACGGTCTGGGGCtgatagcaagcttgcc	0	0	0	0	0	0
908	BG505_gp41_46_N	aggaattctacgctgagtAGAAATTTATTATCTGGCATAGTGCAACAGCAAAGCAATTTGCTGAACGCTATAGAGGCTCAACAACATCTGTTGAAACTCACGGTCTGGGGCtgatagcaagcttgcc	0	0	0	0	0	0
909	BG505_gp41_46_M	aggaattctacgctgagtAGAAATTTATTATCTGGCATAGTGCAACAGCAAAGCAATTTGCTGATGGCTATAGAGGCTCAACAACATCTGTTGAAACTCACGGTCTGGGGCtgatagcaagcttgcc	0	0	0	0	0	0
910	BG505_gp41_46_I	aggaattctacgctgagtAGAAATTTATTATCTGGCATAGTGCAACAGCAAAGCAATTTGCTGATCGCTATAGAGGCTCAACAACATCTGTTGAAACTCACGGTCTGGGGCtgatagcaagcttgcc	0	0	0	0	0	0
911	BG505_gp41_46_T	aggaattctacgctgagtAGAAATTTATTATCTGGCATAGTGCAACAGCAAAGCAATTTGCTGACCGCTATAGAGGCTCAACAACATCTGTTGAAACTCACGGTCTGGGGCtgatagcaagcttgcc	0	0	0	0	0	0
912	BG505_gp41_46_W	aggaattctacgctgagtAGAAATTTATTATCTGGCATAGTGCAACAGCAAAGCAATTTGCTGTGGGCTATAGAGGCTCAACAACATCTGTTGAAACTCACGGTCTGGGGCtgatagcaagcttgcc	0	0	0	0	1	1
913	BG505_gp41_46_C	aggaattctacgctgagtAGAAATTTATTATCTGGCATAGTGCAACAGCAAAGCAATTTGCTGTGCGCTATAGAGGCTCAACAACATCTGTTGAAACTCACGGTCTGGGGCtgatagcaagcttgcc	0	0	0	0	0	0
914	BG505_gp41_46_Y	aggaattctacgctgagtAGAAATTTATTATCTGGCATAGTGCAACAGCAAAGCAATTTGCTGTACGCTATAGAGGCTCAACAACATCTGTTGAAACTCACGGTCTGGGGCtgatagcaagcttgcc	0	0	0	0	2	2
915	BG505_gp41_46_L	aggaattctacgctgagtAGAAATTTATTATCTGGCATAGTGCAACAGCAAAGCAATTTGCTGCTGGCTATAGAGGCTCAACAACATCTGTTGAAACTCACGGTCTGGGGCtgatagcaagcttgcc	0	0	0	0	0	0
916	BG505_gp41_46_F	aggaattctacgctgagtAGAAATTTATTATCTGGCATAGTGCAACAGCAAAGCAATTTGCTGTTCGCTATAGAGGCTCAACAACATCTGTTGAAACTCACGGTCTGGGGCtgatagcaagcttgcc	0	0	0	0	0	0
917	BG505_gp41_46_Q	aggaattctacgctgagtAGAAATTTATTATCTGGCATAGTGCAACAGCAAAGCAATTTGCTGCAGGCTATAGAGGCTCAACAACATCTGTTGAAACTCACGGTCTGGGGCtgatagcaagcttgcc	0	0	10	0	5	9
918	BG505_gp41_46_H	aggaattctacgctgagtAGAAATTTATTATCTGGCATAGTGCAACAGCAAAGCAATTTGCTGCACGCTATAGAGGCTCAACAACATCTGTTGAAACTCACGGTCTGGGGCtgatagcaagcttgcc	0	0	0	0	0	0
919	BG505_gp41_46_P	aggaattctacgctgagtAGAAATTTATTATCTGGCATAGTGCAACAGCAAAGCAATTTGCTGCCGGCTATAGAGGCTCAACAACATCTGTTGAAACTCACGGTCTGGGGCtgatagcaagcttgcc	0	0	0	0	0	0
920	BG505_gp41_47_G	aggaattctacgctgagtAATTTATTATCTGGCATAGTGCAACAGCAAAGCAATTTGCTGAGGGGTATAGAGGCTCAACAACATCTGTTGAAACTCACGGTCTGGGGCATTtgatagcaagcttgcc	0	0	0	0	0	0
921	BG505_gp41_47_E	aggaattctacgctgagtAATTTATTATCTGGCATAGTGCAACAGCAAAGCAATTTGCTGAGGGAAATAGAGGCTCAACAACATCTGTTGAAACTCACGGTCTGGGGCATTtgatagcaagcttgcc	0	0	0	0	0	0
922	BG505_gp41_47_D	aggaattctacgctgagtAATTTATTATCTGGCATAGTGCAACAGCAAAGCAATTTGCTGAGGGACATAGAGGCTCAACAACATCTGTTGAAACTCACGGTCTGGGGCATTtgatagcaagcttgcc	0	0	0	0	0	0
923	BG505_gp41_47_V	aggaattctacgctgagtAATTTATTATCTGGCATAGTGCAACAGCAAAGCAATTTGCTGAGGGTTATAGAGGCTCAACAACATCTGTTGAAACTCACGGTCTGGGGCATTtgatagcaagcttgcc	0	0	0	0	0	0
924	BG505_gp41_47_A	aggaattctacgctgagtAATTTATTATCTGGCATAGTGCAACAGCAAAGCAATTTGCTGAGGGCTATAGAGGCTCAACAACATCTGTTGAAACTCACGGTCTGGGGCATTtgatagcaagcttgcc	0	0	0	0	0	1
925	BG505_gp41_47_R	aggaattctacgctgagtAATTTATTATCTGGCATAGTGCAACAGCAAAGCAATTTGCTGAGGCGTATAGAGGCTCAACAACATCTGTTGAAACTCACGGTCTGGGGCATTtgatagcaagcttgcc	0	0	1	0	1	1
926	BG505_gp41_47_S	aggaattctacgctgagtAATTTATTATCTGGCATAGTGCAACAGCAAAGCAATTTGCTGAGGTCTATAGAGGCTCAACAACATCTGTTGAAACTCACGGTCTGGGGCATTtgatagcaagcttgcc	0	0	0	0	0	0
927	BG505_gp41_47_K	aggaattctacgctgagtAATTTATTATCTGGCATAGTGCAACAGCAAAGCAATTTGCTGAGGAAAATAGAGGCTCAACAACATCTGTTGAAACTCACGGTCTGGGGCATTtgatagcaagcttgcc	0	0	0	0	0	0
928	BG505_gp41_47_N	aggaattctacgctgagtAATTTATTATCTGGCATAGTGCAACAGCAAAGCAATTTGCTGAGGAACATAGAGGCTCAACAACATCTGTTGAAACTCACGGTCTGGGGCATTtgatagcaagcttgcc	0	0	0	0	0	0
929	BG505_gp41_47_M	aggaattctacgctgagtAATTTATTATCTGGCATAGTGCAACAGCAAAGCAATTTGCTGAGGATGATAGAGGCTCAACAACATCTGTTGAAACTCACGGTCTGGGGCATTtgatagcaagcttgcc	0	0	0	0	0	0
930	BG505_gp41_47_I	aggaattctacgctgagtAATTTATTATCTGGCATAGTGCAACAGCAAAGCAATTTGCTGAGGATCATAGAGGCTCAACAACATCTGTTGAAACTCACGGTCTGGGGCATTtgatagcaagcttgcc	0	0	0	0	0	0
931	BG505_gp41_47_T	aggaattctacgctgagtAATTTATTATCTGGCATAGTGCAACAGCAAAGCAATTTGCTGAGGACCATAGAGGCTCAACAACATCTGTTGAAACTCACGGTCTGGGGCATTtgatagcaagcttgcc	0	0	0	0	0	0
932	BG505_gp41_47_W	aggaattctacgctgagtAATTTATTATCTGGCATAGTGCAACAGCAAAGCAATTTGCTGAGGTGGATAGAGGCTCAACAACATCTGTTGAAACTCACGGTCTGGGGCATTtgatagcaagcttgcc	0	0	0	0	0	0
933	BG505_gp41_47_C	aggaattctacgctgagtAATTTATTATCTGGCATAGTGCAACAGCAAAGCAATTTGCTGAGGTGCATAGAGGCTCAACAACATCTGTTGAAACTCACGGTCTGGGGCATTtgatagcaagcttgcc	0	0	0	0	0	0
934	BG505_gp41_47_Y	aggaattctacgctgagtAATTTATTATCTGGCATAGTGCAACAGCAAAGCAATTTGCTGAGGTACATAGAGGCTCAACAACATCTGTTGAAACTCACGGTCTGGGGCATTtgatagcaagcttgcc	0	0	0	0	0	0
935	BG505_gp41_47_L	aggaattctacgctgagtAATTTATTATCTGGCATAGTGCAACAGCAAAGCAATTTGCTGAGGCTGATAGAGGCTCAACAACATCTGTTGAAACTCACGGTCTGGGGCATTtgatagcaagcttgcc	0	0	0	0	0	0
936	BG505_gp41_47_F	aggaattctacgctgagtAATTTATTATCTGGCATAGTGCAACAGCAAAGCAATTTGCTGAGGTTCATAGAGGCTCAACAACATCTGTTGAAACTCACGGTCTGGGGCATTtgatagcaagcttgcc	0	0	0	0	1	0
937	BG505_gp41_47_Q	aggaattctacgctgagtAATTTATTATCTGGCATAGTGCAACAGCAAAGCAATTTGCTGAGGCAGATAGAGGCTCAACAACATCTGTTGAAACTCACGGTCTGGGGCATTtgatagcaagcttgcc	0	0	0	0	0	0
938	BG505_gp41_47_H	aggaattctacgctgagtAATTTATTATCTGGCATAGTGCAACAGCAAAGCAATTTGCTGAGGCACATAGAGGCTCAACAACATCTGTTGAAACTCACGGTCTGGGGCATTtgatagcaagcttgcc	0	0	0	0	0	0
939	BG505_gp41_47_P	aggaattctacgctgagtAATTTATTATCTGGCATAGTGCAACAGCAAAGCAATTTGCTGAGGCCGATAGAGGCTCAACAACATCTGTTGAAACTCACGGTCTGGGGCATTtgatagcaagcttgcc	0	0	0	0	0	0
940	BG505_gp41_48_G	aggaattctacgctgagtTTATTATCTGGCATAGTGCAACAGCAAAGCAATTTGCTGAGGGCTGGTGAGGCTCAACAACATCTGTTGAAACTCACGGTCTGGGGCATTAAAtgatagcaagcttgcc	0	0	0	0	1	0
941	BG505_gp41_48_E	aggaattctacgctgagtTTATTATCTGGCATAGTGCAACAGCAAAGCAATTTGCTGAGGGCTGAAGAGGCTCAACAACATCTGTTGAAACTCACGGTCTGGGGCATTAAAtgatagcaagcttgcc	0	0	0	0	0	0
942	BG505_gp41_48_D	aggaattctacgctgagtTTATTATCTGGCATAGTGCAACAGCAAAGCAATTTGCTGAGGGCTGACGAGGCTCAACAACATCTGTTGAAACTCACGGTCTGGGGCATTAAAtgatagcaagcttgcc	0	0	0	0	10	7
943	BG505_gp41_48_V	aggaattctacgctgagtTTATTATCTGGCATAGTGCAACAGCAAAGCAATTTGCTGAGGGCTGTTGAGGCTCAACAACATCTGTTGAAACTCACGGTCTGGGGCATTAAAtgatagcaagcttgcc	0	0	1	0	23	21
944	BG505_gp41_48_A	aggaattctacgctgagtTTATTATCTGGCATAGTGCAACAGCAAAGCAATTTGCTGAGGGCTGCTGAGGCTCAACAACATCTGTTGAAACTCACGGTCTGGGGCATTAAAtgatagcaagcttgcc	0	0	0	0	1	0
945	BG505_gp41_48_R	aggaattctacgctgagtTTATTATCTGGCATAGTGCAACAGCAAAGCAATTTGCTGAGGGCTCGTGAGGCTCAACAACATCTGTTGAAACTCACGGTCTGGGGCATTAAAtgatagcaagcttgcc	0	0	0	0	5	4
946	BG505_gp41_48_S	aggaattctacgctgagtTTATTATCTGGCATAGTGCAACAGCAAAGCAATTTGCTGAGGGCTTCTGAGGCTCAACAACATCTGTTGAAACTCACGGTCTGGGGCATTAAAtgatagcaagcttgcc	0	0	0	0	16	8
947	BG505_gp41_48_K	aggaattctacgctgagtTTATTATCTGGCATAGTGCAACAGCAAAGCAATTTGCTGAGGGCTAAAGAGGCTCAACAACATCTGTTGAAACTCACGGTCTGGGGCATTAAAtgatagcaagcttgcc	0	0	0	0	1	0
948	BG505_gp41_48_N	aggaattctacgctgagtTTATTATCTGGCATAGTGCAACAGCAAAGCAATTTGCTGAGGGCTAACGAGGCTCAACAACATCTGTTGAAACTCACGGTCTGGGGCATTAAAtgatagcaagcttgcc	0	0	0	0	0	1
949	BG505_gp41_48_M	aggaattctacgctgagtTTATTATCTGGCATAGTGCAACAGCAAAGCAATTTGCTGAGGGCTATGGAGGCTCAACAACATCTGTTGAAACTCACGGTCTGGGGCATTAAAtgatagcaagcttgcc	0	0	0	0	0	0
950	BG505_gp41_48_I	aggaattctacgctgagtTTATTATCTGGCATAGTGCAACAGCAAAGCAATTTGCTGAGGGCTATCGAGGCTCAACAACATCTGTTGAAACTCACGGTCTGGGGCATTAAAtgatagcaagcttgcc	0	0	0	0	0	0
951	BG505_gp41_48_T	aggaattctacgctgagtTTATTATCTGGCATAGTGCAACAGCAAAGCAATTTGCTGAGGGCTACCGAGGCTCAACAACATCTGTTGAAACTCACGGTCTGGGGCATTAAAtgatagcaagcttgcc	0	0	0	0	0	0
952	BG505_gp41_48_W	aggaattctacgctgagtTTATTATCTGGCATAGTGCAACAGCAAAGCAATTTGCTGAGGGCTTGGGAGGCTCAACAACATCTGTTGAAACTCACGGTCTGGGGCATTAAAtgatagcaagcttgcc	0	0	0	0	1	2
953	BG505_gp41_48_C	aggaattctacgctgagtTTATTATCTGGCATAGTGCAACAGCAAAGCAATTTGCTGAGGGCTTGCGAGGCTCAACAACATCTGTTGAAACTCACGGTCTGGGGCATTAAAtgatagcaagcttgcc	0	0	0	0	2	1
954	BG505_gp41_48_Y	aggaattctacgctgagtTTATTATCTGGCATAGTGCAACAGCAAAGCAATTTGCTGAGGGCTTACGAGGCTCAACAACATCTGTTGAAACTCACGGTCTGGGGCATTAAAtgatagcaagcttgcc	0	0	0	0	1	0
955	BG505_gp41_48_L	aggaattctacgctgagtTTATTATCTGGCATAGTGCAACAGCAAAGCAATTTGCTGAGGGCTCTGGAGGCTCAACAACATCTGTTGAAACTCACGGTCTGGGGCATTAAAtgatagcaagcttgcc	0	0	0	0	0	0
956	BG505_gp41_48_F	aggaattctacgctgagtTTATTATCTGGCATAGTGCAACAGCAAAGCAATTTGCTGAGGGCTTTCGAGGCTCAACAACATCTGTTGAAACTCACGGTCTGGGGCATTAAAtgatagcaagcttgcc	0	0	0	0	0	0
957	BG505_gp41_48_Q	aggaattctacgctgagtTTATTATCTGGCATAGTGCAACAGCAAAGCAATTTGCTGAGGGCTCAGGAGGCTCAACAACATCTGTTGAAACTCACGGTCTGGGGCATTAAAtgatagcaagcttgcc	0	0	0	0	7	5
958	BG505_gp41_48_H	aggaattctacgctgagtTTATTATCTGGCATAGTGCAACAGCAAAGCAATTTGCTGAGGGCTCACGAGGCTCAACAACATCTGTTGAAACTCACGGTCTGGGGCATTAAAtgatagcaagcttgcc	0	0	0	0	8	6
959	BG505_gp41_48_P	aggaattctacgctgagtTTATTATCTGGCATAGTGCAACAGCAAAGCAATTTGCTGAGGGCTCCGGAGGCTCAACAACATCTGTTGAAACTCACGGTCTGGGGCATTAAAtgatagcaagcttgcc	0	0	0	0	0	0
960	BG505_gp41_49_G	aggaattctacgctgagtTTATCTGGCATAGTGCAACAGCAAAGCAATTTGCTGAGGGCTATAGGTGCTCAACAACATCTGTTGAAACTCACGGTCTGGGGCATTAAACAGtgatagcaagcttgcc	0	1	0	0	2	2
961	BG505_gp41_49_E	aggaattctacgctgagtTTATCTGGCATAGTGCAACAGCAAAGCAATTTGCTGAGGGCTATAGAAGCTCAACAACATCTGTTGAAACTCACGGTCTGGGGCATTAAACAGtgatagcaagcttgcc	1	0	1	0	35	22
962	BG505_gp41_49_D	aggaattctacgctgagtTTATCTGGCATAGTGCAACAGCAAAGCAATTTGCTGAGGGCTATAGACGCTCAACAACATCTGTTGAAACTCACGGTCTGGGGCATTAAACAGtgatagcaagcttgcc	2	2	1	0	39	27
963	BG505_gp41_49_V	aggaattctacgctgagtTTATCTGGCATAGTGCAACAGCAAAGCAATTTGCTGAGGGCTATAGTTGCTCAACAACATCTGTTGAAACTCACGGTCTGGGGCATTAAACAGtgatagcaagcttgcc	1	0	8	0	32	17
964	BG505_gp41_49_A	aggaattctacgctgagtTTATCTGGCATAGTGCAACAGCAAAGCAATTTGCTGAGGGCTATAGCTGCTCAACAACATCTGTTGAAACTCACGGTCTGGGGCATTAAACAGtgatagcaagcttgcc	1	0	0	0	43	28
965	BG505_gp41_49_R	aggaattctacgctgagtTTATCTGGCATAGTGCAACAGCAAAGCAATTTGCTGAGGGCTATACGTGCTCAACAACATCTGTTGAAACTCACGGTCTGGGGCATTAAACAGtgatagcaagcttgcc	1	0	0	0	6	6
966	BG505_gp41_49_S	aggaattctacgctgagtTTATCTGGCATAGTGCAACAGCAAAGCAATTTGCTGAGGGCTATATCTGCTCAACAACATCTGTTGAAACTCACGGTCTGGGGCATTAAACAGtgatagcaagcttgcc	0	0	0	0	5	3
967	BG505_gp41_49_K	aggaattctacgctgagtTTATCTGGCATAGTGCAACAGCAAAGCAATTTGCTGAGGGCTATAAAAGCTCAACAACATCTGTTGAAACTCACGGTCTGGGGCATTAAACAGtgatagcaagcttgcc	0	0	0	0	14	8
968	BG505_gp41_49_N	aggaattctacgctgagtTTATCTGGCATAGTGCAACAGCAAAGCAATTTGCTGAGGGCTATAAACGCTCAACAACATCTGTTGAAACTCACGGTCTGGGGCATTAAACAGtgatagcaagcttgcc	1	0	0	0	17	9
969	BG505_gp41_49_M	aggaattctacgctgagtTTATCTGGCATAGTGCAACAGCAAAGCAATTTGCTGAGGGCTATAATGGCTCAACAACATCTGTTGAAACTCACGGTCTGGGGCATTAAACAGtgatagcaagcttgcc	1	0	0	0	29	23
970	BG505_gp41_49_I	aggaattctacgctgagtTTATCTGGCATAGTGCAACAGCAAAGCAATTTGCTGAGGGCTATAATCGCTCAACAACATCTGTTGAAACTCACGGTCTGGGGCATTAAACAGtgatagcaagcttgcc	0	1	1	0	15	7
971	BG505_gp41_49_T	aggaattctacgctgagtTTATCTGGCATAGTGCAACAGCAAAGCAATTTGCTGAGGGCTATAACCGCTCAACAACATCTGTTGAAACTCACGGTCTGGGGCATTAAACAGtgatagcaagcttgcc	1	1	0	4	40	28
972	BG505_gp41_49_W	aggaattctacgctgagtTTATCTGGCATAGTGCAACAGCAAAGCAATTTGCTGAGGGCTATATGGGCTCAACAACATCTGTTGAAACTCACGGTCTGGGGCATTAAACAGtgatagcaagcttgcc	0	0	0	0	15	18
973	BG505_gp41_49_C	aggaattctacgctgagtTTATCTGGCATAGTGCAACAGCAAAGCAATTTGCTGAGGGCTATATGCGCTCAACAACATCTGTTGAAACTCACGGTCTGGGGCATTAAACAGtgatagcaagcttgcc	0	0	0	0	9	11
974	BG505_gp41_49_Y	aggaattctacgctgagtTTATCTGGCATAGTGCAACAGCAAAGCAATTTGCTGAGGGCTATATACGCTCAACAACATCTGTTGAAACTCACGGTCTGGGGCATTAAACAGtgatagcaagcttgcc	0	0	0	0	0	0
975	BG505_gp41_49_L	aggaattctacgctgagtTTATCTGGCATAGTGCAACAGCAAAGCAATTTGCTGAGGGCTATACTGGCTCAACAACATCTGTTGAAACTCACGGTCTGGGGCATTAAACAGtgatagcaagcttgcc	0	0	0	0	4	4
976	BG505_gp41_49_F	aggaattctacgctgagtTTATCTGGCATAGTGCAACAGCAAAGCAATTTGCTGAGGGCTATATTCGCTCAACAACATCTGTTGAAACTCACGGTCTGGGGCATTAAACAGtgatagcaagcttgcc	0	1	13	0	39	24
977	BG505_gp41_49_Q	aggaattctacgctgagtTTATCTGGCATAGTGCAACAGCAAAGCAATTTGCTGAGGGCTATACAGGCTCAACAACATCTGTTGAAACTCACGGTCTGGGGCATTAAACAGtgatagcaagcttgcc	0	0	4	0	8	6
978	BG505_gp41_49_H	aggaattctacgctgagtTTATCTGGCATAGTGCAACAGCAAAGCAATTTGCTGAGGGCTATACACGCTCAACAACATCTGTTGAAACTCACGGTCTGGGGCATTAAACAGtgatagcaagcttgcc	0	0	0	0	32	43
979	BG505_gp41_49_P	aggaattctacgctgagtTTATCTGGCATAGTGCAACAGCAAAGCAATTTGCTGAGGGCTATACCGGCTCAACAACATCTGTTGAAACTCACGGTCTGGGGCATTAAACAGtgatagcaagcttgcc	0	1	0	0	35	20
980	BG505_gp41_50_G	aggaattctacgctgagtTCTGGCATAGTGCAACAGCAAAGCAATTTGCTGAGGGCTATAGAGGGTCAACAACATCTGTTGAAACTCACGGTCTGGGGCATTAAACAGCTCtgatagcaagcttgcc	0	0	0	0	26	18
981	BG505_gp41_50_E	aggaattctacgctgagtTCTGGCATAGTGCAACAGCAAAGCAATTTGCTGAGGGCTATAGAGGAACAACAACATCTGTTGAAACTCACGGTCTGGGGCATTAAACAGCTCtgatagcaagcttgcc	1	1	1	0	37	25
982	BG505_gp41_50_D	aggaattctacgctgagtTCTGGCATAGTGCAACAGCAAAGCAATTTGCTGAGGGCTATAGAGGACCAACAACATCTGTTGAAACTCACGGTCTGGGGCATTAAACAGCTCtgatagcaagcttgcc	1	0	0	2	108	92
983	BG505_gp41_50_V	aggaattctacgctgagtTCTGGCATAGTGCAACAGCAAAGCAATTTGCTGAGGGCTATAGAGGTTCAACAACATCTGTTGAAACTCACGGTCTGGGGCATTAAACAGCTCtgatagcaagcttgcc	1	0	0	0	55	31
984	BG505_gp41_50_A	aggaattctacgctgagtTCTGGCATAGTGCAACAGCAAAGCAATTTGCTGAGGGCTATAGAGGCTCAACAACATCTGTTGAAACTCACGGTCTGGGGCATTAAACAGCTCtgatagcaagcttgcc	0	0	1	1	61	39
985	BG505_gp41_50_R	aggaattctacgctgagtTCTGGCATAGTGCAACAGCAAAGCAATTTGCTGAGGGCTATAGAGCGTCAACAACATCTGTTGAAACTCACGGTCTGGGGCATTAAACAGCTCtgatagcaagcttgcc	2	1	0	5	29	28
986	BG505_gp41_50_S	aggaattctacgctgagtTCTGGCATAGTGCAACAGCAAAGCAATTTGCTGAGGGCTATAGAGTCTCAACAACATCTGTTGAAACTCACGGTCTGGGGCATTAAACAGCTCtgatagcaagcttgcc	0	4	3	0	70	45
987	BG505_gp41_50_K	aggaattctacgctgagtTCTGGCATAGTGCAACAGCAAAGCAATTTGCTGAGGGCTATAGAGAAACAACAACATCTGTTGAAACTCACGGTCTGGGGCATTAAACAGCTCtgatagcaagcttgcc	1	2	1	11	66	56
988	BG505_gp41_50_N	aggaattctacgctgagtTCTGGCATAGTGCAACAGCAAAGCAATTTGCTGAGGGCTATAGAGAACCAACAACATCTGTTGAAACTCACGGTCTGGGGCATTAAACAGCTCtgatagcaagcttgcc	1	0	2	0	50	47
989	BG505_gp41_50_M	aggaattctacgctgagtTCTGGCATAGTGCAACAGCAAAGCAATTTGCTGAGGGCTATAGAGATGCAACAACATCTGTTGAAACTCACGGTCTGGGGCATTAAACAGCTCtgatagcaagcttgcc	1	5	0	15	52	22
990	BG505_gp41_50_I	aggaattctacgctgagtTCTGGCATAGTGCAACAGCAAAGCAATTTGCTGAGGGCTATAGAGATCCAACAACATCTGTTGAAACTCACGGTCTGGGGCATTAAACAGCTCtgatagcaagcttgcc	1	3	3	0	26	14
991	BG505_gp41_50_T	aggaattctacgctgagtTCTGGCATAGTGCAACAGCAAAGCAATTTGCTGAGGGCTATAGAGACCCAACAACATCTGTTGAAACTCACGGTCTGGGGCATTAAACAGCTCtgatagcaagcttgcc	0	0	22	0	46	35
992	BG505_gp41_50_W	aggaattctacgctgagtTCTGGCATAGTGCAACAGCAAAGCAATTTGCTGAGGGCTATAGAGTGGCAACAACATCTGTTGAAACTCACGGTCTGGGGCATTAAACAGCTCtgatagcaagcttgcc	2	3	1	0	65	46
993	BG505_gp41_50_C	aggaattctacgctgagtTCTGGCATAGTGCAACAGCAAAGCAATTTGCTGAGGGCTATAGAGTGCCAACAACATCTGTTGAAACTCACGGTCTGGGGCATTAAACAGCTCtgatagcaagcttgcc	0	0	0	0	49	35
994	BG505_gp41_50_Y	aggaattctacgctgagtTCTGGCATAGTGCAACAGCAAAGCAATTTGCTGAGGGCTATAGAGTACCAACAACATCTGTTGAAACTCACGGTCTGGGGCATTAAACAGCTCtgatagcaagcttgcc	0	1	0	0	35	30
995	BG505_gp41_50_L	aggaattctacgctgagtTCTGGCATAGTGCAACAGCAAAGCAATTTGCTGAGGGCTATAGAGCTGCAACAACATCTGTTGAAACTCACGGTCTGGGGCATTAAACAGCTCtgatagcaagcttgcc	3	4	4	11	208	171
996	BG505_gp41_50_F	aggaattctacgctgagtTCTGGCATAGTGCAACAGCAAAGCAATTTGCTGAGGGCTATAGAGTTCCAACAACATCTGTTGAAACTCACGGTCTGGGGCATTAAACAGCTCtgatagcaagcttgcc	1	2	10	1	154	105
997	BG505_gp41_50_Q	aggaattctacgctgagtTCTGGCATAGTGCAACAGCAAAGCAATTTGCTGAGGGCTATAGAGCAGCAACAACATCTGTTGAAACTCACGGTCTGGGGCATTAAACAGCTCtgatagcaagcttgcc	4	3	2	0	180	152
998	BG505_gp41_50_H	aggaattctacgctgagtTCTGGCATAGTGCAACAGCAAAGCAATTTGCTGAGGGCTATAGAGCACCAACAACATCTGTTGAAACTCACGGTCTGGGGCATTAAACAGCTCtgatagcaagcttgcc	1	0	6	0	40	27
999	BG505_gp41_50_P	aggaattctacgctgagtTCTGGCATAGTGCAACAGCAAAGCAATTTGCTGAGGGCTATAGAGCCGCAACAACATCTGTTGAAACTCACGGTCTGGGGCATTAAACAGCTCtgatagcaagcttgcc	0	1	7	0	52	37
1000	BG505_gp41_51_G	aggaattctacgctgagtGGCATAGTGCAACAGCAAAGCAATTTGCTGAGGGCTATAGAGGCTGGTCAACATCTGTTGAAACTCACGGTCTGGGGCATTAAACAGCTCCAGtgatagcaagcttgcc	8	8	29	44	444	258
1001	BG505_gp41_51_E	aggaattctacgctgagtGGCATAGTGCAACAGCAAAGCAATTTGCTGAGGGCTATAGAGGCTGAACAACATCTGTTGAAACTCACGGTCTGGGGCATTAAACAGCTCCAGtgatagcaagcttgcc	3	1	1	0	62	35
1002	BG505_gp41_51_D	aggaattctacgctgagtGGCATAGTGCAACAGCAAAGCAATTTGCTGAGGGCTATAGAGGCTGACCAACATCTGTTGAAACTCACGGTCTGGGGCATTAAACAGCTCCAGtgatagcaagcttgcc	3	14	16	7	471	311
1003	BG505_gp41_51_V	aggaattctacgctgagtGGCATAGTGCAACAGCAAAGCAATTTGCTGAGGGCTATAGAGGCTGTTCAACATCTGTTGAAACTCACGGTCTGGGGCATTAAACAGCTCCAGtgatagcaagcttgcc	3	1	2	0	64	51
1004	BG505_gp41_51_A	aggaattctacgctgagtGGCATAGTGCAACAGCAAAGCAATTTGCTGAGGGCTATAGAGGCTGCTCAACATCTGTTGAAACTCACGGTCTGGGGCATTAAACAGCTCCAGtgatagcaagcttgcc	2	4	29	0	86	69
1005	BG505_gp41_51_R	aggaattctacgctgagtGGCATAGTGCAACAGCAAAGCAATTTGCTGAGGGCTATAGAGGCTCGTCAACATCTGTTGAAACTCACGGTCTGGGGCATTAAACAGCTCCAGtgatagcaagcttgcc	1	3	13	0	153	103
1006	BG505_gp41_51_S	aggaattctacgctgagtGGCATAGTGCAACAGCAAAGCAATTTGCTGAGGGCTATAGAGGCTTCTCAACATCTGTTGAAACTCACGGTCTGGGGCATTAAACAGCTCCAGtgatagcaagcttgcc	0	0	0	0	47	33
1007	BG505_gp41_51_K	aggaattctacgctgagtGGCATAGTGCAACAGCAAAGCAATTTGCTGAGGGCTATAGAGGCTAAACAACATCTGTTGAAACTCACGGTCTGGGGCATTAAACAGCTCCAGtgatagcaagcttgcc	3	1	5	0	121	49
1008	BG505_gp41_51_N	aggaattctacgctgagtGGCATAGTGCAACAGCAAAGCAATTTGCTGAGGGCTATAGAGGCTAACCAACATCTGTTGAAACTCACGGTCTGGGGCATTAAACAGCTCCAGtgatagcaagcttgcc	3	5	14	3	171	105
1009	BG505_gp41_51_M	aggaattctacgctgagtGGCATAGTGCAACAGCAAAGCAATTTGCTGAGGGCTATAGAGGCTATGCAACATCTGTTGAAACTCACGGTCTGGGGCATTAAACAGCTCCAGtgatagcaagcttgcc	4	2	7	0	145	83
1010	BG505_gp41_51_I	aggaattctacgctgagtGGCATAGTGCAACAGCAAAGCAATTTGCTGAGGGCTATAGAGGCTATCCAACATCTGTTGAAACTCACGGTCTGGGGCATTAAACAGCTCCAGtgatagcaagcttgcc	1	3	24	2	63	29
1011	BG505_gp41_51_T	aggaattctacgctgagtGGCATAGTGCAACAGCAAAGCAATTTGCTGAGGGCTATAGAGGCTACCCAACATCTGTTGAAACTCACGGTCTGGGGCATTAAACAGCTCCAGtgatagcaagcttgcc	1	1	14	12	121	69
1012	BG505_gp41_51_W	aggaattctacgctgagtGGCATAGTGCAACAGCAAAGCAATTTGCTGAGGGCTATAGAGGCTTGGCAACATCTGTTGAAACTCACGGTCTGGGGCATTAAACAGCTCCAGtgatagcaagcttgcc	2	5	5	20	302	187
1013	BG505_gp41_51_C	aggaattctacgctgagtGGCATAGTGCAACAGCAAAGCAATTTGCTGAGGGCTATAGAGGCTTGCCAACATCTGTTGAAACTCACGGTCTGGGGCATTAAACAGCTCCAGtgatagcaagcttgcc	0	0	0	2	44	52
1014	BG505_gp41_51_Y	aggaattctacgctgagtGGCATAGTGCAACAGCAAAGCAATTTGCTGAGGGCTATAGAGGCTTACCAACATCTGTTGAAACTCACGGTCTGGGGCATTAAACAGCTCCAGtgatagcaagcttgcc	0	1	0	55	85	61
1015	BG505_gp41_51_L	aggaattctacgctgagtGGCATAGTGCAACAGCAAAGCAATTTGCTGAGGGCTATAGAGGCTCTGCAACATCTGTTGAAACTCACGGTCTGGGGCATTAAACAGCTCCAGtgatagcaagcttgcc	0	1	23	0	118	54
1016	BG505_gp41_51_F	aggaattctacgctgagtGGCATAGTGCAACAGCAAAGCAATTTGCTGAGGGCTATAGAGGCTTTCCAACATCTGTTGAAACTCACGGTCTGGGGCATTAAACAGCTCCAGtgatagcaagcttgcc	5	4	9	9	215	121
1017	BG505_gp41_51_Q	aggaattctacgctgagtGGCATAGTGCAACAGCAAAGCAATTTGCTGAGGGCTATAGAGGCTCAGCAACATCTGTTGAAACTCACGGTCTGGGGCATTAAACAGCTCCAGtgatagcaagcttgcc	0	1	35	0	111	77
1018	BG505_gp41_51_H	aggaattctacgctgagtGGCATAGTGCAACAGCAAAGCAATTTGCTGAGGGCTATAGAGGCTCACCAACATCTGTTGAAACTCACGGTCTGGGGCATTAAACAGCTCCAGtgatagcaagcttgcc	7	3	8	47	263	197
1019	BG505_gp41_51_P	aggaattctacgctgagtGGCATAGTGCAACAGCAAAGCAATTTGCTGAGGGCTATAGAGGCTCCGCAACATCTGTTGAAACTCACGGTCTGGGGCATTAAACAGCTCCAGtgatagcaagcttgcc	5	3	13	0	427	310
1020	BG505_gp41_52_G	aggaattctacgctgagtATAGTGCAACAGCAAAGCAATTTGCTGAGGGCTATAGAGGCTCAAGGTCATCTGTTGAAACTCACGGTCTGGGGCATTAAACAGCTCCAGGCAtgatagcaagcttgcc	1	0	0	0	29	22
1021	BG505_gp41_52_E	aggaattctacgctgagtATAGTGCAACAGCAAAGCAATTTGCTGAGGGCTATAGAGGCTCAAGAACATCTGTTGAAACTCACGGTCTGGGGCATTAAACAGCTCCAGGCAtgatagcaagcttgcc	0	0	6	0	44	34
1022	BG505_gp41_52_D	aggaattctacgctgagtATAGTGCAACAGCAAAGCAATTTGCTGAGGGCTATAGAGGCTCAAGACCATCTGTTGAAACTCACGGTCTGGGGCATTAAACAGCTCCAGGCAtgatagcaagcttgcc	2	3	0	0	21	14
1023	BG505_gp41_52_V	aggaattctacgctgagtATAGTGCAACAGCAAAGCAATTTGCTGAGGGCTATAGAGGCTCAAGTTCATCTGTTGAAACTCACGGTCTGGGGCATTAAACAGCTCCAGGCAtgatagcaagcttgcc	2	0	0	0	36	18
1024	BG505_gp41_52_A	aggaattctacgctgagtATAGTGCAACAGCAAAGCAATTTGCTGAGGGCTATAGAGGCTCAAGCTCATCTGTTGAAACTCACGGTCTGGGGCATTAAACAGCTCCAGGCAtgatagcaagcttgcc	0	0	0	0	15	10
1025	BG505_gp41_52_R	aggaattctacgctgagtATAGTGCAACAGCAAAGCAATTTGCTGAGGGCTATAGAGGCTCAACGTCATCTGTTGAAACTCACGGTCTGGGGCATTAAACAGCTCCAGGCAtgatagcaagcttgcc	0	0	0	0	37	19
1026	BG505_gp41_52_S	aggaattctacgctgagtATAGTGCAACAGCAAAGCAATTTGCTGAGGGCTATAGAGGCTCAATCTCATCTGTTGAAACTCACGGTCTGGGGCATTAAACAGCTCCAGGCAtgatagcaagcttgcc	2	0	0	0	58	29
1027	BG505_gp41_52_K	aggaattctacgctgagtATAGTGCAACAGCAAAGCAATTTGCTGAGGGCTATAGAGGCTCAAAAACATCTGTTGAAACTCACGGTCTGGGGCATTAAACAGCTCCAGGCAtgatagcaagcttgcc	3	4	0	1	87	79
1028	BG505_gp41_52_N	aggaattctacgctgagtATAGTGCAACAGCAAAGCAATTTGCTGAGGGCTATAGAGGCTCAAAACCATCTGTTGAAACTCACGGTCTGGGGCATTAAACAGCTCCAGGCAtgatagcaagcttgcc	1	4	0	0	61	39
1029	BG505_gp41_52_M	aggaattctacgctgagtATAGTGCAACAGCAAAGCAATTTGCTGAGGGCTATAGAGGCTCAAATGCATCTGTTGAAACTCACGGTCTGGGGCATTAAACAGCTCCAGGCAtgatagcaagcttgcc	0	0	0	0	17	4
1030	BG505_gp41_52_I	aggaattctacgctgagtATAGTGCAACAGCAAAGCAATTTGCTGAGGGCTATAGAGGCTCAAATCCATCTGTTGAAACTCACGGTCTGGGGCATTAAACAGCTCCAGGCAtgatagcaagcttgcc	0	0	0	0	14	6
1031	BG505_gp41_52_T	aggaattctacgctgagtATAGTGCAACAGCAAAGCAATTTGCTGAGGGCTATAGAGGCTCAAACCCATCTGTTGAAACTCACGGTCTGGGGCATTAAACAGCTCCAGGCAtgatagcaagcttgcc	1	2	4	0	59	32
1032	BG505_gp41_52_W	aggaattctacgctgagtATAGTGCAACAGCAAAGCAATTTGCTGAGGGCTATAGAGGCTCAATGGCATCTGTTGAAACTCACGGTCTGGGGCATTAAACAGCTCCAGGCAtgatagcaagcttgcc	0	1	0	0	48	32
1033	BG505_gp41_52_C	aggaattctacgctgagtATAGTGCAACAGCAAAGCAATTTGCTGAGGGCTATAGAGGCTCAATGCCATCTGTTGAAACTCACGGTCTGGGGCATTAAACAGCTCCAGGCAtgatagcaagcttgcc	0	0	0	6	47	24
1034	BG505_gp41_52_Y	aggaattctacgctgagtATAGTGCAACAGCAAAGCAATTTGCTGAGGGCTATAGAGGCTCAATACCATCTGTTGAAACTCACGGTCTGGGGCATTAAACAGCTCCAGGCAtgatagcaagcttgcc	0	1	0	0	74	52
1035	BG505_gp41_52_L	aggaattctacgctgagtATAGTGCAACAGCAAAGCAATTTGCTGAGGGCTATAGAGGCTCAACTGCATCTGTTGAAACTCACGGTCTGGGGCATTAAACAGCTCCAGGCAtgatagcaagcttgcc	1	0	0	0	23	13
1036	BG505_gp41_52_F	aggaattctacgctgagtATAGTGCAACAGCAAAGCAATTTGCTGAGGGCTATAGAGGCTCAATTCCATCTGTTGAAACTCACGGTCTGGGGCATTAAACAGCTCCAGGCAtgatagcaagcttgcc	1	1	0	0	26	28
1037	BG505_gp41_52_Q	aggaattctacgctgagtATAGTGCAACAGCAAAGCAATTTGCTGAGGGCTATAGAGGCTCAACAGCATCTGTTGAAACTCACGGTCTGGGGCATTAAACAGCTCCAGGCAtgatagcaagcttgcc	0	0	1	14	54	44
1038	BG505_gp41_52_H	aggaattctacgctgagtATAGTGCAACAGCAAAGCAATTTGCTGAGGGCTATAGAGGCTCAACACCATCTGTTGAAACTCACGGTCTGGGGCATTAAACAGCTCCAGGCAtgatagcaagcttgcc	2	3	0	0	34	27
1039	BG505_gp41_52_P	aggaattctacgctgagtATAGTGCAACAGCAAAGCAATTTGCTGAGGGCTATAGAGGCTCAACCGCATCTGTTGAAACTCACGGTCTGGGGCATTAAACAGCTCCAGGCAtgatagcaagcttgcc	0	0	10	0	36	33
1040	BG505_gp41_53_G	aggaattctacgctgagtGTGCAACAGCAAAGCAATTTGCTGAGGGCTATAGAGGCTCAACAAGGTCTGTTGAAACTCACGGTCTGGGGCATTAAACAGCTCCAGGCAAGGtgatagcaagcttgcc	1	2	5	60	118	93
1041	BG505_gp41_53_E	aggaattctacgctgagtGTGCAACAGCAAAGCAATTTGCTGAGGGCTATAGAGGCTCAACAAGAACTGTTGAAACTCACGGTCTGGGGCATTAAACAGCTCCAGGCAAGGtgatagcaagcttgcc	1	1	0	0	49	31
1042	BG505_gp41_53_D	aggaattctacgctgagtGTGCAACAGCAAAGCAATTTGCTGAGGGCTATAGAGGCTCAACAAGACCTGTTGAAACTCACGGTCTGGGGCATTAAACAGCTCCAGGCAAGGtgatagcaagcttgcc	3	5	5	0	136	105
1043	BG505_gp41_53_V	aggaattctacgctgagtGTGCAACAGCAAAGCAATTTGCTGAGGGCTATAGAGGCTCAACAAGTTCTGTTGAAACTCACGGTCTGGGGCATTAAACAGCTCCAGGCAAGGtgatagcaagcttgcc	2	0	0	0	69	59
1044	BG505_gp41_53_A	aggaattctacgctgagtGTGCAACAGCAAAGCAATTTGCTGAGGGCTATAGAGGCTCAACAAGCTCTGTTGAAACTCACGGTCTGGGGCATTAAACAGCTCCAGGCAAGGtgatagcaagcttgcc	1	1	3	0	68	75
1045	BG505_gp41_53_R	aggaattctacgctgagtGTGCAACAGCAAAGCAATTTGCTGAGGGCTATAGAGGCTCAACAACGTCTGTTGAAACTCACGGTCTGGGGCATTAAACAGCTCCAGGCAAGGtgatagcaagcttgcc	1	1	11	3	105	87
1046	BG505_gp41_53_S	aggaattctacgctgagtGTGCAACAGCAAAGCAATTTGCTGAGGGCTATAGAGGCTCAACAATCTCTGTTGAAACTCACGGTCTGGGGCATTAAACAGCTCCAGGCAAGGtgatagcaagcttgcc	3	5	11	40	184	159
1047	BG505_gp41_53_K	aggaattctacgctgagtGTGCAACAGCAAAGCAATTTGCTGAGGGCTATAGAGGCTCAACAAAAACTGTTGAAACTCACGGTCTGGGGCATTAAACAGCTCCAGGCAAGGtgatagcaagcttgcc	0	2	3	8	98	63
1048	BG505_gp41_53_N	aggaattctacgctgagtGTGCAACAGCAAAGCAATTTGCTGAGGGCTATAGAGGCTCAACAAAACCTGTTGAAACTCACGGTCTGGGGCATTAAACAGCTCCAGGCAAGGtgatagcaagcttgcc	8	5	2	8	160	90
1049	BG505_gp41_53_M	aggaattctacgctgagtGTGCAACAGCAAAGCAATTTGCTGAGGGCTATAGAGGCTCAACAAATGCTGTTGAAACTCACGGTCTGGGGCATTAAACAGCTCCAGGCAAGGtgatagcaagcttgcc	3	1	4	0	69	36
1050	BG505_gp41_53_I	aggaattctacgctgagtGTGCAACAGCAAAGCAATTTGCTGAGGGCTATAGAGGCTCAACAAATCCTGTTGAAACTCACGGTCTGGGGCATTAAACAGCTCCAGGCAAGGtgatagcaagcttgcc	1	4	40	16	121	82
1051	BG505_gp41_53_T	aggaattctacgctgagtGTGCAACAGCAAAGCAATTTGCTGAGGGCTATAGAGGCTCAACAAACCCTGTTGAAACTCACGGTCTGGGGCATTAAACAGCTCCAGGCAAGGtgatagcaagcttgcc	2	2	5	1	109	71
1052	BG505_gp41_53_W	aggaattctacgctgagtGTGCAACAGCAAAGCAATTTGCTGAGGGCTATAGAGGCTCAACAATGGCTGTTGAAACTCACGGTCTGGGGCATTAAACAGCTCCAGGCAAGGtgatagcaagcttgcc	0	3	0	0	14	12
1053	BG505_gp41_53_C	aggaattctacgctgagtGTGCAACAGCAAAGCAATTTGCTGAGGGCTATAGAGGCTCAACAATGCCTGTTGAAACTCACGGTCTGGGGCATTAAACAGCTCCAGGCAAGGtgatagcaagcttgcc	2	2	36	11	129	92
1054	BG505_gp41_53_Y	aggaattctacgctgagtGTGCAACAGCAAAGCAATTTGCTGAGGGCTATAGAGGCTCAACAATACCTGTTGAAACTCACGGTCTGGGGCATTAAACAGCTCCAGGCAAGGtgatagcaagcttgcc	2	0	13	0	120	84
1055	BG505_gp41_53_L	aggaattctacgctgagtGTGCAACAGCAAAGCAATTTGCTGAGGGCTATAGAGGCTCAACAACTGCTGTTGAAACTCACGGTCTGGGGCATTAAACAGCTCCAGGCAAGGtgatagcaagcttgcc	1	3	7	0	55	39
1056	BG505_gp41_53_F	aggaattctacgctgagtGTGCAACAGCAAAGCAATTTGCTGAGGGCTATAGAGGCTCAACAATTCCTGTTGAAACTCACGGTCTGGGGCATTAAACAGCTCCAGGCAAGGtgatagcaagcttgcc	1	4	0	15	103	66
1057	BG505_gp41_53_Q	aggaattctacgctgagtGTGCAACAGCAAAGCAATTTGCTGAGGGCTATAGAGGCTCAACAACAGCTGTTGAAACTCACGGTCTGGGGCATTAAACAGCTCCAGGCAAGGtgatagcaagcttgcc	4	6	28	6	207	140
1058	BG505_gp41_53_H	aggaattctacgctgagtGTGCAACAGCAAAGCAATTTGCTGAGGGCTATAGAGGCTCAACAACACCTGTTGAAACTCACGGTCTGGGGCATTAAACAGCTCCAGGCAAGGtgatagcaagcttgcc	0	1	1	15	71	34
1059	BG505_gp41_53_P	aggaattctacgctgagtGTGCAACAGCAAAGCAATTTGCTGAGGGCTATAGAGGCTCAACAACCGCTGTTGAAACTCACGGTCTGGGGCATTAAACAGCTCCAGGCAAGGtgatagcaagcttgcc	2	3	44	1	211	157
1060	BG505_gp41_54_G	aggaattctacgctgagtCAACAGCAAAGCAATTTGCTGAGGGCTATAGAGGCTCAACAACATGGTTTGAAACTCACGGTCTGGGGCATTAAACAGCTCCAGGCAAGGGTCtgatagcaagcttgcc	6	10	58	30	284	251
1061	BG505_gp41_54_E	aggaattctacgctgagtCAACAGCAAAGCAATTTGCTGAGGGCTATAGAGGCTCAACAACATGAATTGAAACTCACGGTCTGGGGCATTAAACAGCTCCAGGCAAGGGTCtgatagcaagcttgcc	1	4	32	3	202	140
1062	BG505_gp41_54_D	aggaattctacgctgagtCAACAGCAAAGCAATTTGCTGAGGGCTATAGAGGCTCAACAACATGACTTGAAACTCACGGTCTGGGGCATTAAACAGCTCCAGGCAAGGGTCtgatagcaagcttgcc	2	5	0	15	151	126
1063	BG505_gp41_54_V	aggaattctacgctgagtCAACAGCAAAGCAATTTGCTGAGGGCTATAGAGGCTCAACAACATGTTTTGAAACTCACGGTCTGGGGCATTAAACAGCTCCAGGCAAGGGTCtgatagcaagcttgcc	0	4	22	0	75	53
1064	BG505_gp41_54_A	aggaattctacgctgagtCAACAGCAAAGCAATTTGCTGAGGGCTATAGAGGCTCAACAACATGCTTTGAAACTCACGGTCTGGGGCATTAAACAGCTCCAGGCAAGGGTCtgatagcaagcttgcc	6	2	23	2	252	166
1065	BG505_gp41_54_R	aggaattctacgctgagtCAACAGCAAAGCAATTTGCTGAGGGCTATAGAGGCTCAACAACATCGTTTGAAACTCACGGTCTGGGGCATTAAACAGCTCCAGGCAAGGGTCtgatagcaagcttgcc	4	3	26	25	391	371
1066	BG505_gp41_54_S	aggaattctacgctgagtCAACAGCAAAGCAATTTGCTGAGGGCTATAGAGGCTCAACAACATTCTTTGAAACTCACGGTCTGGGGCATTAAACAGCTCCAGGCAAGGGTCtgatagcaagcttgcc	7	12	40	15	314	256
1067	BG505_gp41_54_K	aggaattctacgctgagtCAACAGCAAAGCAATTTGCTGAGGGCTATAGAGGCTCAACAACATAAATTGAAACTCACGGTCTGGGGCATTAAACAGCTCCAGGCAAGGGTCtgatagcaagcttgcc	2	4	14	0	206	161
1068	BG505_gp41_54_N	aggaattctacgctgagtCAACAGCAAAGCAATTTGCTGAGGGCTATAGAGGCTCAACAACATAACTTGAAACTCACGGTCTGGGGCATTAAACAGCTCCAGGCAAGGGTCtgatagcaagcttgcc	0	0	12	9	108	87
1069	BG505_gp41_54_M	aggaattctacgctgagtCAACAGCAAAGCAATTTGCTGAGGGCTATAGAGGCTCAACAACATATGTTGAAACTCACGGTCTGGGGCATTAAACAGCTCCAGGCAAGGGTCtgatagcaagcttgcc	2	2	11	3	163	123
1070	BG505_gp41_54_I	aggaattctacgctgagtCAACAGCAAAGCAATTTGCTGAGGGCTATAGAGGCTCAACAACATATCTTGAAACTCACGGTCTGGGGCATTAAACAGCTCCAGGCAAGGGTCtgatagcaagcttgcc	2	4	0	0	58	56
1071	BG505_gp41_54_T	aggaattctacgctgagtCAACAGCAAAGCAATTTGCTGAGGGCTATAGAGGCTCAACAACATACCTTGAAACTCACGGTCTGGGGCATTAAACAGCTCCAGGCAAGGGTCtgatagcaagcttgcc	5	5	4	18	150	134
1072	BG505_gp41_54_W	aggaattctacgctgagtCAACAGCAAAGCAATTTGCTGAGGGCTATAGAGGCTCAACAACATTGGTTGAAACTCACGGTCTGGGGCATTAAACAGCTCCAGGCAAGGGTCtgatagcaagcttgcc	4	7	23	0	205	159
1073	BG505_gp41_54_C	aggaattctacgctgagtCAACAGCAAAGCAATTTGCTGAGGGCTATAGAGGCTCAACAACATTGCTTGAAACTCACGGTCTGGGGCATTAAACAGCTCCAGGCAAGGGTCtgatagcaagcttgcc	1	2	0	6	100	59
1074	BG505_gp41_54_Y	aggaattctacgctgagtCAACAGCAAAGCAATTTGCTGAGGGCTATAGAGGCTCAACAACATTACTTGAAACTCACGGTCTGGGGCATTAAACAGCTCCAGGCAAGGGTCtgatagcaagcttgcc	2	4	25	0	254	181
1075	BG505_gp41_54_L	aggaattctacgctgagtCAACAGCAAAGCAATTTGCTGAGGGCTATAGAGGCTCAACAACATCTGTTGAAACTCACGGTCTGGGGCATTAAACAGCTCCAGGCAAGGGTCtgatagcaagcttgcc	4	2	9	1	149	129
1076	BG505_gp41_54_F	aggaattctacgctgagtCAACAGCAAAGCAATTTGCTGAGGGCTATAGAGGCTCAACAACATTTCTTGAAACTCACGGTCTGGGGCATTAAACAGCTCCAGGCAAGGGTCtgatagcaagcttgcc	2	5	2	1	126	94
1077	BG505_gp41_54_Q	aggaattctacgctgagtCAACAGCAAAGCAATTTGCTGAGGGCTATAGAGGCTCAACAACATCAGTTGAAACTCACGGTCTGGGGCATTAAACAGCTCCAGGCAAGGGTCtgatagcaagcttgcc	2	1	27	38	141	102
1078	BG505_gp41_54_H	aggaattctacgctgagtCAACAGCAAAGCAATTTGCTGAGGGCTATAGAGGCTCAACAACATCACTTGAAACTCACGGTCTGGGGCATTAAACAGCTCCAGGCAAGGGTCtgatagcaagcttgcc	6	9	40	14	299	223
1079	BG505_gp41_54_P	aggaattctacgctgagtCAACAGCAAAGCAATTTGCTGAGGGCTATAGAGGCTCAACAACATCCGTTGAAACTCACGGTCTGGGGCATTAAACAGCTCCAGGCAAGGGTCtgatagcaagcttgcc	1	0	0	0	95	57
1080	BG505_gp41_55_G	aggaattctacgctgagtCAGCAAAGCAATTTGCTGAGGGCTATAGAGGCTCAACAACATCTGGGTAAACTCACGGTCTGGGGCATTAAACAGCTCCAGGCAAGGGTCCTGtgatagcaagcttgcc	1	1	24	2	168	114
1081	BG505_gp41_55_E	aggaattctacgctgagtCAGCAAAGCAATTTGCTGAGGGCTATAGAGGCTCAACAACATCTGGAAAAACTCACGGTCTGGGGCATTAAACAGCTCCAGGCAAGGGTCCTGtgatagcaagcttgcc	4	3	31	2	155	122
1082	BG505_gp41_55_D	aggaattctacgctgagtCAGCAAAGCAATTTGCTGAGGGCTATAGAGGCTCAACAACATCTGGACAAACTCACGGTCTGGGGCATTAAACAGCTCCAGGCAAGGGTCCTGtgatagcaagcttgcc	1	2	20	0	63	55
1083	BG505_gp41_55_V	aggaattctacgctgagtCAGCAAAGCAATTTGCTGAGGGCTATAGAGGCTCAACAACATCTGGTTAAACTCACGGTCTGGGGCATTAAACAGCTCCAGGCAAGGGTCCTGtgatagcaagcttgcc	0	3	6	0	133	106
1084	BG505_gp41_55_A	aggaattctacgctgagtCAGCAAAGCAATTTGCTGAGGGCTATAGAGGCTCAACAACATCTGGCTAAACTCACGGTCTGGGGCATTAAACAGCTCCAGGCAAGGGTCCTGtgatagcaagcttgcc	4	1	0	0	124	95
1085	BG505_gp41_55_R	aggaattctacgctgagtCAGCAAAGCAATTTGCTGAGGGCTATAGAGGCTCAACAACATCTGCGTAAACTCACGGTCTGGGGCATTAAACAGCTCCAGGCAAGGGTCCTGtgatagcaagcttgcc	4	4	5	16	153	120
1086	BG505_gp41_55_S	aggaattctacgctgagtCAGCAAAGCAATTTGCTGAGGGCTATAGAGGCTCAACAACATCTGTCTAAACTCACGGTCTGGGGCATTAAACAGCTCCAGGCAAGGGTCCTGtgatagcaagcttgcc	1	2	35	10	198	156
1087	BG505_gp41_55_K	aggaattctacgctgagtCAGCAAAGCAATTTGCTGAGGGCTATAGAGGCTCAACAACATCTGAAAAAACTCACGGTCTGGGGCATTAAACAGCTCCAGGCAAGGGTCCTGtgatagcaagcttgcc	9	8	21	41	421	296
1088	BG505_gp41_55_N	aggaattctacgctgagtCAGCAAAGCAATTTGCTGAGGGCTATAGAGGCTCAACAACATCTGAACAAACTCACGGTCTGGGGCATTAAACAGCTCCAGGCAAGGGTCCTGtgatagcaagcttgcc	0	0	7	0	110	114
1089	BG505_gp41_55_M	aggaattctacgctgagtCAGCAAAGCAATTTGCTGAGGGCTATAGAGGCTCAACAACATCTGATGAAACTCACGGTCTGGGGCATTAAACAGCTCCAGGCAAGGGTCCTGtgatagcaagcttgcc	3	7	33	15	250	186
1090	BG505_gp41_55_I	aggaattctacgctgagtCAGCAAAGCAATTTGCTGAGGGCTATAGAGGCTCAACAACATCTGATCAAACTCACGGTCTGGGGCATTAAACAGCTCCAGGCAAGGGTCCTGtgatagcaagcttgcc	1	2	12	1	91	47
1091	BG505_gp41_55_T	aggaattctacgctgagtCAGCAAAGCAATTTGCTGAGGGCTATAGAGGCTCAACAACATCTGACCAAACTCACGGTCTGGGGCATTAAACAGCTCCAGGCAAGGGTCCTGtgatagcaagcttgcc	2	8	0	23	110	81
1092	BG505_gp41_55_W	aggaattctacgctgagtCAGCAAAGCAATTTGCTGAGGGCTATAGAGGCTCAACAACATCTGTGGAAACTCACGGTCTGGGGCATTAAACAGCTCCAGGCAAGGGTCCTGtgatagcaagcttgcc	9	10	48	0	342	291
1093	BG505_gp41_55_C	aggaattctacgctgagtCAGCAAAGCAATTTGCTGAGGGCTATAGAGGCTCAACAACATCTGTGCAAACTCACGGTCTGGGGCATTAAACAGCTCCAGGCAAGGGTCCTGtgatagcaagcttgcc	9	3	105	42	482	381
1094	BG505_gp41_55_Y	aggaattctacgctgagtCAGCAAAGCAATTTGCTGAGGGCTATAGAGGCTCAACAACATCTGTACAAACTCACGGTCTGGGGCATTAAACAGCTCCAGGCAAGGGTCCTGtgatagcaagcttgcc	6	5	45	24	287	201
1095	BG505_gp41_55_L	aggaattctacgctgagtCAGCAAAGCAATTTGCTGAGGGCTATAGAGGCTCAACAACATCTGCTGAAACTCACGGTCTGGGGCATTAAACAGCTCCAGGCAAGGGTCCTGtgatagcaagcttgcc	5	5	11	8	156	101
1096	BG505_gp41_55_F	aggaattctacgctgagtCAGCAAAGCAATTTGCTGAGGGCTATAGAGGCTCAACAACATCTGTTCAAACTCACGGTCTGGGGCATTAAACAGCTCCAGGCAAGGGTCCTGtgatagcaagcttgcc	2	2	9	4	151	68
1097	BG505_gp41_55_Q	aggaattctacgctgagtCAGCAAAGCAATTTGCTGAGGGCTATAGAGGCTCAACAACATCTGCAGAAACTCACGGTCTGGGGCATTAAACAGCTCCAGGCAAGGGTCCTGtgatagcaagcttgcc	7	4	11	9	243	187
1098	BG505_gp41_55_H	aggaattctacgctgagtCAGCAAAGCAATTTGCTGAGGGCTATAGAGGCTCAACAACATCTGCACAAACTCACGGTCTGGGGCATTAAACAGCTCCAGGCAAGGGTCCTGtgatagcaagcttgcc	4	0	30	31	270	159
1099	BG505_gp41_55_P	aggaattctacgctgagtCAGCAAAGCAATTTGCTGAGGGCTATAGAGGCTCAACAACATCTGCCGAAACTCACGGTCTGGGGCATTAAACAGCTCCAGGCAAGGGTCCTGtgatagcaagcttgcc	7	8	45	26	549	364
1100	BG505_gp41_56_G	aggaattctacgctgagtCAAAGCAATTTGCTGAGGGCTATAGAGGCTCAACAACATCTGTTGGGTCTCACGGTCTGGGGCATTAAACAGCTCCAGGCAAGGGTCCTGGCTtgatagcaagcttgcc	0	0	0	0	15	9
1101	BG505_gp41_56_E	aggaattctacgctgagtCAAAGCAATTTGCTGAGGGCTATAGAGGCTCAACAACATCTGTTGGAACTCACGGTCTGGGGCATTAAACAGCTCCAGGCAAGGGTCCTGGCTtgatagcaagcttgcc	0	0	0	0	23	27
1102	BG505_gp41_56_D	aggaattctacgctgagtCAAAGCAATTTGCTGAGGGCTATAGAGGCTCAACAACATCTGTTGGACCTCACGGTCTGGGGCATTAAACAGCTCCAGGCAAGGGTCCTGGCTtgatagcaagcttgcc	1	1	0	0	57	51
1103	BG505_gp41_56_V	aggaattctacgctgagtCAAAGCAATTTGCTGAGGGCTATAGAGGCTCAACAACATCTGTTGGTTCTCACGGTCTGGGGCATTAAACAGCTCCAGGCAAGGGTCCTGGCTtgatagcaagcttgcc	1	1	0	0	46	26
1104	BG505_gp41_56_A	aggaattctacgctgagtCAAAGCAATTTGCTGAGGGCTATAGAGGCTCAACAACATCTGTTGGCTCTCACGGTCTGGGGCATTAAACAGCTCCAGGCAAGGGTCCTGGCTtgatagcaagcttgcc	0	1	0	0	20	6
1105	BG505_gp41_56_R	aggaattctacgctgagtCAAAGCAATTTGCTGAGGGCTATAGAGGCTCAACAACATCTGTTGCGTCTCACGGTCTGGGGCATTAAACAGCTCCAGGCAAGGGTCCTGGCTtgatagcaagcttgcc	0	0	0	0	26	23
1106	BG505_gp41_56_S	aggaattctacgctgagtCAAAGCAATTTGCTGAGGGCTATAGAGGCTCAACAACATCTGTTGTCTCTCACGGTCTGGGGCATTAAACAGCTCCAGGCAAGGGTCCTGGCTtgatagcaagcttgcc	0	0	0	0	4	1
1107	BG505_gp41_56_K	aggaattctacgctgagtCAAAGCAATTTGCTGAGGGCTATAGAGGCTCAACAACATCTGTTGAAACTCACGGTCTGGGGCATTAAACAGCTCCAGGCAAGGGTCCTGGCTtgatagcaagcttgcc	1	1	0	0	17	10
1108	BG505_gp41_56_N	aggaattctacgctgagtCAAAGCAATTTGCTGAGGGCTATAGAGGCTCAACAACATCTGTTGAACCTCACGGTCTGGGGCATTAAACAGCTCCAGGCAAGGGTCCTGGCTtgatagcaagcttgcc	0	1	0	0	31	31
1109	BG505_gp41_56_M	aggaattctacgctgagtCAAAGCAATTTGCTGAGGGCTATAGAGGCTCAACAACATCTGTTGATGCTCACGGTCTGGGGCATTAAACAGCTCCAGGCAAGGGTCCTGGCTtgatagcaagcttgcc	0	0	0	0	14	5
1110	BG505_gp41_56_I	aggaattctacgctgagtCAAAGCAATTTGCTGAGGGCTATAGAGGCTCAACAACATCTGTTGATCCTCACGGTCTGGGGCATTAAACAGCTCCAGGCAAGGGTCCTGGCTtgatagcaagcttgcc	0	0	6	0	9	4
1111	BG505_gp41_56_T	aggaattctacgctgagtCAAAGCAATTTGCTGAGGGCTATAGAGGCTCAACAACATCTGTTGACCCTCACGGTCTGGGGCATTAAACAGCTCCAGGCAAGGGTCCTGGCTtgatagcaagcttgcc	1	0	0	0	8	4
1112	BG505_gp41_56_W	aggaattctacgctgagtCAAAGCAATTTGCTGAGGGCTATAGAGGCTCAACAACATCTGTTGTGGCTCACGGTCTGGGGCATTAAACAGCTCCAGGCAAGGGTCCTGGCTtgatagcaagcttgcc	1	0	4	27	39	34
1113	BG505_gp41_56_C	aggaattctacgctgagtCAAAGCAATTTGCTGAGGGCTATAGAGGCTCAACAACATCTGTTGTGCCTCACGGTCTGGGGCATTAAACAGCTCCAGGCAAGGGTCCTGGCTtgatagcaagcttgcc	0	1	0	0	11	13
1114	BG505_gp41_56_Y	aggaattctacgctgagtCAAAGCAATTTGCTGAGGGCTATAGAGGCTCAACAACATCTGTTGTACCTCACGGTCTGGGGCATTAAACAGCTCCAGGCAAGGGTCCTGGCTtgatagcaagcttgcc	0	0	0	0	7	17
1115	BG505_gp41_56_L	aggaattctacgctgagtCAAAGCAATTTGCTGAGGGCTATAGAGGCTCAACAACATCTGTTGCTGCTCACGGTCTGGGGCATTAAACAGCTCCAGGCAAGGGTCCTGGCTtgatagcaagcttgcc	0	1	1	17	60	52
1116	BG505_gp41_56_F	aggaattctacgctgagtCAAAGCAATTTGCTGAGGGCTATAGAGGCTCAACAACATCTGTTGTTCCTCACGGTCTGGGGCATTAAACAGCTCCAGGCAAGGGTCCTGGCTtgatagcaagcttgcc	0	0	0	0	1	1
1117	BG505_gp41_56_Q	aggaattctacgctgagtCAAAGCAATTTGCTGAGGGCTATAGAGGCTCAACAACATCTGTTGCAGCTCACGGTCTGGGGCATTAAACAGCTCCAGGCAAGGGTCCTGGCTtgatagcaagcttgcc	0	0	0	0	4	4
1118	BG505_gp41_56_H	aggaattctacgctgagtCAAAGCAATTTGCTGAGGGCTATAGAGGCTCAACAACATCTGTTGCACCTCACGGTCTGGGGCATTAAACAGCTCCAGGCAAGGGTCCTGGCTtgatagcaagcttgcc	0	0	0	0	19	10
1119	BG505_gp41_56_P	aggaattctacgctgagtCAAAGCAATTTGCTGAGGGCTATAGAGGCTCAACAACATCTGTTGCCGCTCACGGTCTGGGGCATTAAACAGCTCCAGGCAAGGGTCCTGGCTtgatagcaagcttgcc	1	1	0	0	22	25
1120	BG505_gp41_57_G	aggaattctacgctgagtAGCAATTTGCTGAGGGCTATAGAGGCTCAACAACATCTGTTGAAAGGTACGGTCTGGGGCATTAAACAGCTCCAGGCAAGGGTCCTGGCTGTGtgatagcaagcttgcc	4	0	4	0	19	7
1121	BG505_gp41_57_E	aggaattctacgctgagtAGCAATTTGCTGAGGGCTATAGAGGCTCAACAACATCTGTTGAAAGAAACGGTCTGGGGCATTAAACAGCTCCAGGCAAGGGTCCTGGCTGTGtgatagcaagcttgcc	0	2	0	0	1	4
1122	BG505_gp41_57_D	aggaattctacgctgagtAGCAATTTGCTGAGGGCTATAGAGGCTCAACAACATCTGTTGAAAGACACGGTCTGGGGCATTAAACAGCTCCAGGCAAGGGTCCTGGCTGTGtgatagcaagcttgcc	0	1	0	0	13	8
1123	BG505_gp41_57_V	aggaattctacgctgagtAGCAATTTGCTGAGGGCTATAGAGGCTCAACAACATCTGTTGAAAGTTACGGTCTGGGGCATTAAACAGCTCCAGGCAAGGGTCCTGGCTGTGtgatagcaagcttgcc	0	0	0	0	13	8
1124	BG505_gp41_57_A	aggaattctacgctgagtAGCAATTTGCTGAGGGCTATAGAGGCTCAACAACATCTGTTGAAAGCTACGGTCTGGGGCATTAAACAGCTCCAGGCAAGGGTCCTGGCTGTGtgatagcaagcttgcc	0	0	0	0	2	1
1125	BG505_gp41_57_R	aggaattctacgctgagtAGCAATTTGCTGAGGGCTATAGAGGCTCAACAACATCTGTTGAAACGTACGGTCTGGGGCATTAAACAGCTCCAGGCAAGGGTCCTGGCTGTGtgatagcaagcttgcc	0	0	0	0	16	26
1126	BG505_gp41_57_S	aggaattctacgctgagtAGCAATTTGCTGAGGGCTATAGAGGCTCAACAACATCTGTTGAAATCTACGGTCTGGGGCATTAAACAGCTCCAGGCAAGGGTCCTGGCTGTGtgatagcaagcttgcc	3	0	0	2	36	22
1127	BG505_gp41_57_K	aggaattctacgctgagtAGCAATTTGCTGAGGGCTATAGAGGCTCAACAACATCTGTTGAAAAAAACGGTCTGGGGCATTAAACAGCTCCAGGCAAGGGTCCTGGCTGTGtgatagcaagcttgcc	0	1	0	0	8	5
1128	BG505_gp41_57_N	aggaattctacgctgagtAGCAATTTGCTGAGGGCTATAGAGGCTCAACAACATCTGTTGAAAAACACGGTCTGGGGCATTAAACAGCTCCAGGCAAGGGTCCTGGCTGTGtgatagcaagcttgcc	0	0	0	0	5	2
1129	BG505_gp41_57_M	aggaattctacgctgagtAGCAATTTGCTGAGGGCTATAGAGGCTCAACAACATCTGTTGAAAATGACGGTCTGGGGCATTAAACAGCTCCAGGCAAGGGTCCTGGCTGTGtgatagcaagcttgcc	0	0	0	0	1	0
1130	BG505_gp41_57_I	aggaattctacgctgagtAGCAATTTGCTGAGGGCTATAGAGGCTCAACAACATCTGTTGAAAATCACGGTCTGGGGCATTAAACAGCTCCAGGCAAGGGTCCTGGCTGTGtgatagcaagcttgcc	0	0	0	0	0	0
1131	BG505_gp41_57_T	aggaattctacgctgagtAGCAATTTGCTGAGGGCTATAGAGGCTCAACAACATCTGTTGAAAACCACGGTCTGGGGCATTAAACAGCTCCAGGCAAGGGTCCTGGCTGTGtgatagcaagcttgcc	3	2	0	0	96	52
1132	BG505_gp41_57_W	aggaattctacgctgagtAGCAATTTGCTGAGGGCTATAGAGGCTCAACAACATCTGTTGAAATGGACGGTCTGGGGCATTAAACAGCTCCAGGCAAGGGTCCTGGCTGTGtgatagcaagcttgcc	0	0	0	0	47	22
1133	BG505_gp41_57_C	aggaattctacgctgagtAGCAATTTGCTGAGGGCTATAGAGGCTCAACAACATCTGTTGAAATGCACGGTCTGGGGCATTAAACAGCTCCAGGCAAGGGTCCTGGCTGTGtgatagcaagcttgcc	0	0	0	0	12	21
1134	BG505_gp41_57_Y	aggaattctacgctgagtAGCAATTTGCTGAGGGCTATAGAGGCTCAACAACATCTGTTGAAATACACGGTCTGGGGCATTAAACAGCTCCAGGCAAGGGTCCTGGCTGTGtgatagcaagcttgcc	1	0	0	0	19	14
1135	BG505_gp41_57_L	aggaattctacgctgagtAGCAATTTGCTGAGGGCTATAGAGGCTCAACAACATCTGTTGAAACTGACGGTCTGGGGCATTAAACAGCTCCAGGCAAGGGTCCTGGCTGTGtgatagcaagcttgcc	0	0	0	0	12	16
1136	BG505_gp41_57_F	aggaattctacgctgagtAGCAATTTGCTGAGGGCTATAGAGGCTCAACAACATCTGTTGAAATTCACGGTCTGGGGCATTAAACAGCTCCAGGCAAGGGTCCTGGCTGTGtgatagcaagcttgcc	0	0	0	0	2	1
1137	BG505_gp41_57_Q	aggaattctacgctgagtAGCAATTTGCTGAGGGCTATAGAGGCTCAACAACATCTGTTGAAACAGACGGTCTGGGGCATTAAACAGCTCCAGGCAAGGGTCCTGGCTGTGtgatagcaagcttgcc	0	0	0	0	1	1
1138	BG505_gp41_57_H	aggaattctacgctgagtAGCAATTTGCTGAGGGCTATAGAGGCTCAACAACATCTGTTGAAACACACGGTCTGGGGCATTAAACAGCTCCAGGCAAGGGTCCTGGCTGTGtgatagcaagcttgcc	1	0	3	0	22	9
1139	BG505_gp41_57_P	aggaattctacgctgagtAGCAATTTGCTGAGGGCTATAGAGGCTCAACAACATCTGTTGAAACCGACGGTCTGGGGCATTAAACAGCTCCAGGCAAGGGTCCTGGCTGTGtgatagcaagcttgcc	0	0	2	0	18	19
1140	BG505_gp41_58_G	aggaattctacgctgagtAATTTGCTGAGGGCTATAGAGGCTCAACAACATCTGTTGAAACTCGGTGTCTGGGGCATTAAACAGCTCCAGGCAAGGGTCCTGGCTGTGGAAtgatagcaagcttgcc	0	0	0	0	0	0
1141	BG505_gp41_58_E	aggaattctacgctgagtAATTTGCTGAGGGCTATAGAGGCTCAACAACATCTGTTGAAACTCGAAGTCTGGGGCATTAAACAGCTCCAGGCAAGGGTCCTGGCTGTGGAAtgatagcaagcttgcc	0	0	0	0	8	10
1142	BG505_gp41_58_D	aggaattctacgctgagtAATTTGCTGAGGGCTATAGAGGCTCAACAACATCTGTTGAAACTCGACGTCTGGGGCATTAAACAGCTCCAGGCAAGGGTCCTGGCTGTGGAAtgatagcaagcttgcc	1	1	0	0	7	5
1143	BG505_gp41_58_V	aggaattctacgctgagtAATTTGCTGAGGGCTATAGAGGCTCAACAACATCTGTTGAAACTCGTTGTCTGGGGCATTAAACAGCTCCAGGCAAGGGTCCTGGCTGTGGAAtgatagcaagcttgcc	0	0	0	0	1	1
1144	BG505_gp41_58_A	aggaattctacgctgagtAATTTGCTGAGGGCTATAGAGGCTCAACAACATCTGTTGAAACTCGCTGTCTGGGGCATTAAACAGCTCCAGGCAAGGGTCCTGGCTGTGGAAtgatagcaagcttgcc	0	0	0	0	0	0
1145	BG505_gp41_58_R	aggaattctacgctgagtAATTTGCTGAGGGCTATAGAGGCTCAACAACATCTGTTGAAACTCCGTGTCTGGGGCATTAAACAGCTCCAGGCAAGGGTCCTGGCTGTGGAAtgatagcaagcttgcc	0	0	0	0	4	1
1146	BG505_gp41_58_S	aggaattctacgctgagtAATTTGCTGAGGGCTATAGAGGCTCAACAACATCTGTTGAAACTCTCTGTCTGGGGCATTAAACAGCTCCAGGCAAGGGTCCTGGCTGTGGAAtgatagcaagcttgcc	0	0	1	0	58	45
1147	BG505_gp41_58_K	aggaattctacgctgagtAATTTGCTGAGGGCTATAGAGGCTCAACAACATCTGTTGAAACTCAAAGTCTGGGGCATTAAACAGCTCCAGGCAAGGGTCCTGGCTGTGGAAtgatagcaagcttgcc	0	0	0	0	4	4
1148	BG505_gp41_58_N	aggaattctacgctgagtAATTTGCTGAGGGCTATAGAGGCTCAACAACATCTGTTGAAACTCAACGTCTGGGGCATTAAACAGCTCCAGGCAAGGGTCCTGGCTGTGGAAtgatagcaagcttgcc	0	0	0	0	0	0
1149	BG505_gp41_58_M	aggaattctacgctgagtAATTTGCTGAGGGCTATAGAGGCTCAACAACATCTGTTGAAACTCATGGTCTGGGGCATTAAACAGCTCCAGGCAAGGGTCCTGGCTGTGGAAtgatagcaagcttgcc	0	2	6	0	7	15
1150	BG505_gp41_58_I	aggaattctacgctgagtAATTTGCTGAGGGCTATAGAGGCTCAACAACATCTGTTGAAACTCATCGTCTGGGGCATTAAACAGCTCCAGGCAAGGGTCCTGGCTGTGGAAtgatagcaagcttgcc	0	0	0	0	1	4
1151	BG505_gp41_58_T	aggaattctacgctgagtAATTTGCTGAGGGCTATAGAGGCTCAACAACATCTGTTGAAACTCACCGTCTGGGGCATTAAACAGCTCCAGGCAAGGGTCCTGGCTGTGGAAtgatagcaagcttgcc	0	0	0	0	3	1
1152	BG505_gp41_58_W	aggaattctacgctgagtAATTTGCTGAGGGCTATAGAGGCTCAACAACATCTGTTGAAACTCTGGGTCTGGGGCATTAAACAGCTCCAGGCAAGGGTCCTGGCTGTGGAAtgatagcaagcttgcc	1	1	0	0	1	7
1153	BG505_gp41_58_C	aggaattctacgctgagtAATTTGCTGAGGGCTATAGAGGCTCAACAACATCTGTTGAAACTCTGCGTCTGGGGCATTAAACAGCTCCAGGCAAGGGTCCTGGCTGTGGAAtgatagcaagcttgcc	0	0	0	0	0	0
1154	BG505_gp41_58_Y	aggaattctacgctgagtAATTTGCTGAGGGCTATAGAGGCTCAACAACATCTGTTGAAACTCTACGTCTGGGGCATTAAACAGCTCCAGGCAAGGGTCCTGGCTGTGGAAtgatagcaagcttgcc	0	0	0	0	0	0
1155	BG505_gp41_58_L	aggaattctacgctgagtAATTTGCTGAGGGCTATAGAGGCTCAACAACATCTGTTGAAACTCCTGGTCTGGGGCATTAAACAGCTCCAGGCAAGGGTCCTGGCTGTGGAAtgatagcaagcttgcc	1	0	0	0	7	0
1156	BG505_gp41_58_F	aggaattctacgctgagtAATTTGCTGAGGGCTATAGAGGCTCAACAACATCTGTTGAAACTCTTCGTCTGGGGCATTAAACAGCTCCAGGCAAGGGTCCTGGCTGTGGAAtgatagcaagcttgcc	0	0	0	0	0	1
1157	BG505_gp41_58_Q	aggaattctacgctgagtAATTTGCTGAGGGCTATAGAGGCTCAACAACATCTGTTGAAACTCCAGGTCTGGGGCATTAAACAGCTCCAGGCAAGGGTCCTGGCTGTGGAAtgatagcaagcttgcc	0	0	0	0	1	0
1158	BG505_gp41_58_H	aggaattctacgctgagtAATTTGCTGAGGGCTATAGAGGCTCAACAACATCTGTTGAAACTCCACGTCTGGGGCATTAAACAGCTCCAGGCAAGGGTCCTGGCTGTGGAAtgatagcaagcttgcc	0	0	0	0	9	3
1159	BG505_gp41_58_P	aggaattctacgctgagtAATTTGCTGAGGGCTATAGAGGCTCAACAACATCTGTTGAAACTCCCGGTCTGGGGCATTAAACAGCTCCAGGCAAGGGTCCTGGCTGTGGAAtgatagcaagcttgcc	0	0	0	0	0	1
1160	BG505_gp41_59_G	aggaattctacgctgagtTTGCTGAGGGCTATAGAGGCTCAACAACATCTGTTGAAACTCACGGGTTGGGGCATTAAACAGCTCCAGGCAAGGGTCCTGGCTGTGGAAAGAtgatagcaagcttgcc	0	0	0	0	22	12
1161	BG505_gp41_59_E	aggaattctacgctgagtTTGCTGAGGGCTATAGAGGCTCAACAACATCTGTTGAAACTCACGGAATGGGGCATTAAACAGCTCCAGGCAAGGGTCCTGGCTGTGGAAAGAtgatagcaagcttgcc	0	0	0	0	51	43
1162	BG505_gp41_59_D	aggaattctacgctgagtTTGCTGAGGGCTATAGAGGCTCAACAACATCTGTTGAAACTCACGGACTGGGGCATTAAACAGCTCCAGGCAAGGGTCCTGGCTGTGGAAAGAtgatagcaagcttgcc	0	2	0	0	65	63
1163	BG505_gp41_59_V	aggaattctacgctgagtTTGCTGAGGGCTATAGAGGCTCAACAACATCTGTTGAAACTCACGGTTTGGGGCATTAAACAGCTCCAGGCAAGGGTCCTGGCTGTGGAAAGAtgatagcaagcttgcc	1	3	0	0	39	30
1164	BG505_gp41_59_A	aggaattctacgctgagtTTGCTGAGGGCTATAGAGGCTCAACAACATCTGTTGAAACTCACGGCTTGGGGCATTAAACAGCTCCAGGCAAGGGTCCTGGCTGTGGAAAGAtgatagcaagcttgcc	1	0	0	2	20	17
1165	BG505_gp41_59_R	aggaattctacgctgagtTTGCTGAGGGCTATAGAGGCTCAACAACATCTGTTGAAACTCACGCGTTGGGGCATTAAACAGCTCCAGGCAAGGGTCCTGGCTGTGGAAAGAtgatagcaagcttgcc	0	0	4	0	45	30
1166	BG505_gp41_59_S	aggaattctacgctgagtTTGCTGAGGGCTATAGAGGCTCAACAACATCTGTTGAAACTCACGTCTTGGGGCATTAAACAGCTCCAGGCAAGGGTCCTGGCTGTGGAAAGAtgatagcaagcttgcc	1	2	0	0	89	79
1167	BG505_gp41_59_K	aggaattctacgctgagtTTGCTGAGGGCTATAGAGGCTCAACAACATCTGTTGAAACTCACGAAATGGGGCATTAAACAGCTCCAGGCAAGGGTCCTGGCTGTGGAAAGAtgatagcaagcttgcc	0	0	0	0	22	15
1168	BG505_gp41_59_N	aggaattctacgctgagtTTGCTGAGGGCTATAGAGGCTCAACAACATCTGTTGAAACTCACGAACTGGGGCATTAAACAGCTCCAGGCAAGGGTCCTGGCTGTGGAAAGAtgatagcaagcttgcc	1	0	0	0	15	19
1169	BG505_gp41_59_M	aggaattctacgctgagtTTGCTGAGGGCTATAGAGGCTCAACAACATCTGTTGAAACTCACGATGTGGGGCATTAAACAGCTCCAGGCAAGGGTCCTGGCTGTGGAAAGAtgatagcaagcttgcc	2	1	0	0	92	60
1170	BG505_gp41_59_I	aggaattctacgctgagtTTGCTGAGGGCTATAGAGGCTCAACAACATCTGTTGAAACTCACGATCTGGGGCATTAAACAGCTCCAGGCAAGGGTCCTGGCTGTGGAAAGAtgatagcaagcttgcc	1	3	18	5	61	50
1171	BG505_gp41_59_T	aggaattctacgctgagtTTGCTGAGGGCTATAGAGGCTCAACAACATCTGTTGAAACTCACGACCTGGGGCATTAAACAGCTCCAGGCAAGGGTCCTGGCTGTGGAAAGAtgatagcaagcttgcc	0	0	0	0	76	41
1172	BG505_gp41_59_W	aggaattctacgctgagtTTGCTGAGGGCTATAGAGGCTCAACAACATCTGTTGAAACTCACGTGGTGGGGCATTAAACAGCTCCAGGCAAGGGTCCTGGCTGTGGAAAGAtgatagcaagcttgcc	1	1	0	7	155	97
1173	BG505_gp41_59_C	aggaattctacgctgagtTTGCTGAGGGCTATAGAGGCTCAACAACATCTGTTGAAACTCACGTGCTGGGGCATTAAACAGCTCCAGGCAAGGGTCCTGGCTGTGGAAAGAtgatagcaagcttgcc	0	3	4	0	5	8
1174	BG505_gp41_59_Y	aggaattctacgctgagtTTGCTGAGGGCTATAGAGGCTCAACAACATCTGTTGAAACTCACGTACTGGGGCATTAAACAGCTCCAGGCAAGGGTCCTGGCTGTGGAAAGAtgatagcaagcttgcc	0	0	0	4	25	27
1175	BG505_gp41_59_L	aggaattctacgctgagtTTGCTGAGGGCTATAGAGGCTCAACAACATCTGTTGAAACTCACGCTGTGGGGCATTAAACAGCTCCAGGCAAGGGTCCTGGCTGTGGAAAGAtgatagcaagcttgcc	1	2	0	0	20	18
1176	BG505_gp41_59_F	aggaattctacgctgagtTTGCTGAGGGCTATAGAGGCTCAACAACATCTGTTGAAACTCACGTTCTGGGGCATTAAACAGCTCCAGGCAAGGGTCCTGGCTGTGGAAAGAtgatagcaagcttgcc	0	0	0	0	34	27
1177	BG505_gp41_59_Q	aggaattctacgctgagtTTGCTGAGGGCTATAGAGGCTCAACAACATCTGTTGAAACTCACGCAGTGGGGCATTAAACAGCTCCAGGCAAGGGTCCTGGCTGTGGAAAGAtgatagcaagcttgcc	0	0	0	0	8	12
1178	BG505_gp41_59_H	aggaattctacgctgagtTTGCTGAGGGCTATAGAGGCTCAACAACATCTGTTGAAACTCACGCACTGGGGCATTAAACAGCTCCAGGCAAGGGTCCTGGCTGTGGAAAGAtgatagcaagcttgcc	0	0	1	0	10	11
1179	BG505_gp41_59_P	aggaattctacgctgagtTTGCTGAGGGCTATAGAGGCTCAACAACATCTGTTGAAACTCACGCCGTGGGGCATTAAACAGCTCCAGGCAAGGGTCCTGGCTGTGGAAAGAtgatagcaagcttgcc	1	0	0	0	36	28
1180	BG505_gp41_60_G	aggaattctacgctgagtCTGAGGGCTATAGAGGCTCAACAACATCTGTTGAAACTCACGGTCGGTGGCATTAAACAGCTCCAGGCAAGGGTCCTGGCTGTGGAAAGATACtgatagcaagcttgcc	0	0	0	0	36	35
1181	BG505_gp41_60_E	aggaattctacgctgagtCTGAGGGCTATAGAGGCTCAACAACATCTGTTGAAACTCACGGTCGAAGGCATTAAACAGCTCCAGGCAAGGGTCCTGGCTGTGGAAAGATACtgatagcaagcttgcc	1	0	24	0	75	47
1182	BG505_gp41_60_D	aggaattctacgctgagtCTGAGGGCTATAGAGGCTCAACAACATCTGTTGAAACTCACGGTCGACGGCATTAAACAGCTCCAGGCAAGGGTCCTGGCTGTGGAAAGATACtgatagcaagcttgcc	0	1	3	0	60	40
1183	BG505_gp41_60_V	aggaattctacgctgagtCTGAGGGCTATAGAGGCTCAACAACATCTGTTGAAACTCACGGTCGTTGGCATTAAACAGCTCCAGGCAAGGGTCCTGGCTGTGGAAAGATACtgatagcaagcttgcc	1	0	7	0	46	49
1184	BG505_gp41_60_A	aggaattctacgctgagtCTGAGGGCTATAGAGGCTCAACAACATCTGTTGAAACTCACGGTCGCTGGCATTAAACAGCTCCAGGCAAGGGTCCTGGCTGTGGAAAGATACtgatagcaagcttgcc	1	0	0	0	30	29
1185	BG505_gp41_60_R	aggaattctacgctgagtCTGAGGGCTATAGAGGCTCAACAACATCTGTTGAAACTCACGGTCCGTGGCATTAAACAGCTCCAGGCAAGGGTCCTGGCTGTGGAAAGATACtgatagcaagcttgcc	2	0	4	0	46	32
1186	BG505_gp41_60_S	aggaattctacgctgagtCTGAGGGCTATAGAGGCTCAACAACATCTGTTGAAACTCACGGTCTCTGGCATTAAACAGCTCCAGGCAAGGGTCCTGGCTGTGGAAAGATACtgatagcaagcttgcc	0	1	22	28	166	98
1187	BG505_gp41_60_K	aggaattctacgctgagtCTGAGGGCTATAGAGGCTCAACAACATCTGTTGAAACTCACGGTCAAAGGCATTAAACAGCTCCAGGCAAGGGTCCTGGCTGTGGAAAGATACtgatagcaagcttgcc	0	1	9	22	138	114
1188	BG505_gp41_60_N	aggaattctacgctgagtCTGAGGGCTATAGAGGCTCAACAACATCTGTTGAAACTCACGGTCAACGGCATTAAACAGCTCCAGGCAAGGGTCCTGGCTGTGGAAAGATACtgatagcaagcttgcc	0	1	0	0	39	33
1189	BG505_gp41_60_M	aggaattctacgctgagtCTGAGGGCTATAGAGGCTCAACAACATCTGTTGAAACTCACGGTCATGGGCATTAAACAGCTCCAGGCAAGGGTCCTGGCTGTGGAAAGATACtgatagcaagcttgcc	0	3	0	0	44	33
1190	BG505_gp41_60_I	aggaattctacgctgagtCTGAGGGCTATAGAGGCTCAACAACATCTGTTGAAACTCACGGTCATCGGCATTAAACAGCTCCAGGCAAGGGTCCTGGCTGTGGAAAGATACtgatagcaagcttgcc	4	2	0	36	60	60
1191	BG505_gp41_60_T	aggaattctacgctgagtCTGAGGGCTATAGAGGCTCAACAACATCTGTTGAAACTCACGGTCACCGGCATTAAACAGCTCCAGGCAAGGGTCCTGGCTGTGGAAAGATACtgatagcaagcttgcc	1	1	16	5	33	33
1192	BG505_gp41_60_W	aggaattctacgctgagtCTGAGGGCTATAGAGGCTCAACAACATCTGTTGAAACTCACGGTCTGGGGCATTAAACAGCTCCAGGCAAGGGTCCTGGCTGTGGAAAGATACtgatagcaagcttgcc	1	4	7	0	101	57
1193	BG505_gp41_60_C	aggaattctacgctgagtCTGAGGGCTATAGAGGCTCAACAACATCTGTTGAAACTCACGGTCTGCGGCATTAAACAGCTCCAGGCAAGGGTCCTGGCTGTGGAAAGATACtgatagcaagcttgcc	2	8	21	2	139	111
1194	BG505_gp41_60_Y	aggaattctacgctgagtCTGAGGGCTATAGAGGCTCAACAACATCTGTTGAAACTCACGGTCTACGGCATTAAACAGCTCCAGGCAAGGGTCCTGGCTGTGGAAAGATACtgatagcaagcttgcc	0	3	8	5	57	39
1195	BG505_gp41_60_L	aggaattctacgctgagtCTGAGGGCTATAGAGGCTCAACAACATCTGTTGAAACTCACGGTCCTGGGCATTAAACAGCTCCAGGCAAGGGTCCTGGCTGTGGAAAGATACtgatagcaagcttgcc	3	3	4	2	130	82
1196	BG505_gp41_60_F	aggaattctacgctgagtCTGAGGGCTATAGAGGCTCAACAACATCTGTTGAAACTCACGGTCTTCGGCATTAAACAGCTCCAGGCAAGGGTCCTGGCTGTGGAAAGATACtgatagcaagcttgcc	0	0	0	0	17	20
1197	BG505_gp41_60_Q	aggaattctacgctgagtCTGAGGGCTATAGAGGCTCAACAACATCTGTTGAAACTCACGGTCCAGGGCATTAAACAGCTCCAGGCAAGGGTCCTGGCTGTGGAAAGATACtgatagcaagcttgcc	1	0	0	0	5	6
1198	BG505_gp41_60_H	aggaattctacgctgagtCTGAGGGCTATAGAGGCTCAACAACATCTGTTGAAACTCACGGTCCACGGCATTAAACAGCTCCAGGCAAGGGTCCTGGCTGTGGAAAGATACtgatagcaagcttgcc	0	0	0	1	41	34
1199	BG505_gp41_60_P	aggaattctacgctgagtCTGAGGGCTATAGAGGCTCAACAACATCTGTTGAAACTCACGGTCCCGGGCATTAAACAGCTCCAGGCAAGGGTCCTGGCTGTGGAAAGATACtgatagcaagcttgcc	0	2	0	0	46	35
1200	BG505_gp41_61_G	aggaattctacgctgagtAGGGCTATAGAGGCTCAACAACATCTGTTGAAACTCACGGTCTGGGGTATTAAACAGCTCCAGGCAAGGGTCCTGGCTGTGGAAAGATACCTAtgatagcaagcttgcc	3	3	0	0	60	56
1201	BG505_gp41_61_E	aggaattctacgctgagtAGGGCTATAGAGGCTCAACAACATCTGTTGAAACTCACGGTCTGGGAAATTAAACAGCTCCAGGCAAGGGTCCTGGCTGTGGAAAGATACCTAtgatagcaagcttgcc	1	0	0	0	39	35
1202	BG505_gp41_61_D	aggaattctacgctgagtAGGGCTATAGAGGCTCAACAACATCTGTTGAAACTCACGGTCTGGGACATTAAACAGCTCCAGGCAAGGGTCCTGGCTGTGGAAAGATACCTAtgatagcaagcttgcc	3	6	1	0	44	38
1203	BG505_gp41_61_V	aggaattctacgctgagtAGGGCTATAGAGGCTCAACAACATCTGTTGAAACTCACGGTCTGGGTTATTAAACAGCTCCAGGCAAGGGTCCTGGCTGTGGAAAGATACCTAtgatagcaagcttgcc	1	0	20	3	233	170
1204	BG505_gp41_61_A	aggaattctacgctgagtAGGGCTATAGAGGCTCAACAACATCTGTTGAAACTCACGGTCTGGGCTATTAAACAGCTCCAGGCAAGGGTCCTGGCTGTGGAAAGATACCTAtgatagcaagcttgcc	1	0	1	0	23	24
1205	BG505_gp41_61_R	aggaattctacgctgagtAGGGCTATAGAGGCTCAACAACATCTGTTGAAACTCACGGTCTGGCGTATTAAACAGCTCCAGGCAAGGGTCCTGGCTGTGGAAAGATACCTAtgatagcaagcttgcc	1	2	0	2	64	59
1206	BG505_gp41_61_S	aggaattctacgctgagtAGGGCTATAGAGGCTCAACAACATCTGTTGAAACTCACGGTCTGGTCTATTAAACAGCTCCAGGCAAGGGTCCTGGCTGTGGAAAGATACCTAtgatagcaagcttgcc	0	1	1	0	24	23
1207	BG505_gp41_61_K	aggaattctacgctgagtAGGGCTATAGAGGCTCAACAACATCTGTTGAAACTCACGGTCTGGAAAATTAAACAGCTCCAGGCAAGGGTCCTGGCTGTGGAAAGATACCTAtgatagcaagcttgcc	0	0	2	0	52	27
1208	BG505_gp41_61_N	aggaattctacgctgagtAGGGCTATAGAGGCTCAACAACATCTGTTGAAACTCACGGTCTGGAACATTAAACAGCTCCAGGCAAGGGTCCTGGCTGTGGAAAGATACCTAtgatagcaagcttgcc	2	1	2	14	147	99
1209	BG505_gp41_61_M	aggaattctacgctgagtAGGGCTATAGAGGCTCAACAACATCTGTTGAAACTCACGGTCTGGATGATTAAACAGCTCCAGGCAAGGGTCCTGGCTGTGGAAAGATACCTAtgatagcaagcttgcc	0	0	0	0	60	41
1210	BG505_gp41_61_I	aggaattctacgctgagtAGGGCTATAGAGGCTCAACAACATCTGTTGAAACTCACGGTCTGGATCATTAAACAGCTCCAGGCAAGGGTCCTGGCTGTGGAAAGATACCTAtgatagcaagcttgcc	0	0	0	0	41	23
1211	BG505_gp41_61_T	aggaattctacgctgagtAGGGCTATAGAGGCTCAACAACATCTGTTGAAACTCACGGTCTGGACCATTAAACAGCTCCAGGCAAGGGTCCTGGCTGTGGAAAGATACCTAtgatagcaagcttgcc	0	1	12	5	24	25
1212	BG505_gp41_61_W	aggaattctacgctgagtAGGGCTATAGAGGCTCAACAACATCTGTTGAAACTCACGGTCTGGTGGATTAAACAGCTCCAGGCAAGGGTCCTGGCTGTGGAAAGATACCTAtgatagcaagcttgcc	0	1	0	0	37	20
1213	BG505_gp41_61_C	aggaattctacgctgagtAGGGCTATAGAGGCTCAACAACATCTGTTGAAACTCACGGTCTGGTGCATTAAACAGCTCCAGGCAAGGGTCCTGGCTGTGGAAAGATACCTAtgatagcaagcttgcc	0	0	0	1	64	65
1214	BG505_gp41_61_Y	aggaattctacgctgagtAGGGCTATAGAGGCTCAACAACATCTGTTGAAACTCACGGTCTGGTACATTAAACAGCTCCAGGCAAGGGTCCTGGCTGTGGAAAGATACCTAtgatagcaagcttgcc	1	2	2	0	36	23
1215	BG505_gp41_61_L	aggaattctacgctgagtAGGGCTATAGAGGCTCAACAACATCTGTTGAAACTCACGGTCTGGCTGATTAAACAGCTCCAGGCAAGGGTCCTGGCTGTGGAAAGATACCTAtgatagcaagcttgcc	0	0	12	0	29	19
1216	BG505_gp41_61_F	aggaattctacgctgagtAGGGCTATAGAGGCTCAACAACATCTGTTGAAACTCACGGTCTGGTTCATTAAACAGCTCCAGGCAAGGGTCCTGGCTGTGGAAAGATACCTAtgatagcaagcttgcc	1	1	15	1	23	23
1217	BG505_gp41_61_Q	aggaattctacgctgagtAGGGCTATAGAGGCTCAACAACATCTGTTGAAACTCACGGTCTGGCAGATTAAACAGCTCCAGGCAAGGGTCCTGGCTGTGGAAAGATACCTAtgatagcaagcttgcc	0	1	0	9	83	51
1218	BG505_gp41_61_H	aggaattctacgctgagtAGGGCTATAGAGGCTCAACAACATCTGTTGAAACTCACGGTCTGGCACATTAAACAGCTCCAGGCAAGGGTCCTGGCTGTGGAAAGATACCTAtgatagcaagcttgcc	0	2	0	0	18	21
1219	BG505_gp41_61_P	aggaattctacgctgagtAGGGCTATAGAGGCTCAACAACATCTGTTGAAACTCACGGTCTGGCCGATTAAACAGCTCCAGGCAAGGGTCCTGGCTGTGGAAAGATACCTAtgatagcaagcttgcc	0	2	0	0	56	46
1220	BG505_gp41_62_G	aggaattctacgctgagtGCTATAGAGGCTCAACAACATCTGTTGAAACTCACGGTCTGGGGCGGTAAACAGCTCCAGGCAAGGGTCCTGGCTGTGGAAAGATACCTAAGGtgatagcaagcttgcc	2	0	17	3	71	42
1221	BG505_gp41_62_E	aggaattctacgctgagtGCTATAGAGGCTCAACAACATCTGTTGAAACTCACGGTCTGGGGCGAAAAACAGCTCCAGGCAAGGGTCCTGGCTGTGGAAAGATACCTAAGGtgatagcaagcttgcc	2	1	0	0	22	20
1222	BG505_gp41_62_D	aggaattctacgctgagtGCTATAGAGGCTCAACAACATCTGTTGAAACTCACGGTCTGGGGCGACAAACAGCTCCAGGCAAGGGTCCTGGCTGTGGAAAGATACCTAAGGtgatagcaagcttgcc	0	1	0	0	63	59
1223	BG505_gp41_62_V	aggaattctacgctgagtGCTATAGAGGCTCAACAACATCTGTTGAAACTCACGGTCTGGGGCGTTAAACAGCTCCAGGCAAGGGTCCTGGCTGTGGAAAGATACCTAAGGtgatagcaagcttgcc	0	0	0	0	20	9
1224	BG505_gp41_62_A	aggaattctacgctgagtGCTATAGAGGCTCAACAACATCTGTTGAAACTCACGGTCTGGGGCGCTAAACAGCTCCAGGCAAGGGTCCTGGCTGTGGAAAGATACCTAAGGtgatagcaagcttgcc	1	3	12	0	53	41
1225	BG505_gp41_62_R	aggaattctacgctgagtGCTATAGAGGCTCAACAACATCTGTTGAAACTCACGGTCTGGGGCCGTAAACAGCTCCAGGCAAGGGTCCTGGCTGTGGAAAGATACCTAAGGtgatagcaagcttgcc	0	0	0	0	19	14
1226	BG505_gp41_62_S	aggaattctacgctgagtGCTATAGAGGCTCAACAACATCTGTTGAAACTCACGGTCTGGGGCTCTAAACAGCTCCAGGCAAGGGTCCTGGCTGTGGAAAGATACCTAAGGtgatagcaagcttgcc	1	0	12	3	86	66
1227	BG505_gp41_62_K	aggaattctacgctgagtGCTATAGAGGCTCAACAACATCTGTTGAAACTCACGGTCTGGGGCAAAAAACAGCTCCAGGCAAGGGTCCTGGCTGTGGAAAGATACCTAAGGtgatagcaagcttgcc	2	3	0	0	65	46
1228	BG505_gp41_62_N	aggaattctacgctgagtGCTATAGAGGCTCAACAACATCTGTTGAAACTCACGGTCTGGGGCAACAAACAGCTCCAGGCAAGGGTCCTGGCTGTGGAAAGATACCTAAGGtgatagcaagcttgcc	0	0	0	0	10	15
1229	BG505_gp41_62_M	aggaattctacgctgagtGCTATAGAGGCTCAACAACATCTGTTGAAACTCACGGTCTGGGGCATGAAACAGCTCCAGGCAAGGGTCCTGGCTGTGGAAAGATACCTAAGGtgatagcaagcttgcc	0	2	0	0	44	32
1230	BG505_gp41_62_I	aggaattctacgctgagtGCTATAGAGGCTCAACAACATCTGTTGAAACTCACGGTCTGGGGCATCAAACAGCTCCAGGCAAGGGTCCTGGCTGTGGAAAGATACCTAAGGtgatagcaagcttgcc	3	1	3	0	128	74
1231	BG505_gp41_62_T	aggaattctacgctgagtGCTATAGAGGCTCAACAACATCTGTTGAAACTCACGGTCTGGGGCACCAAACAGCTCCAGGCAAGGGTCCTGGCTGTGGAAAGATACCTAAGGtgatagcaagcttgcc	3	3	17	0	94	82
1232	BG505_gp41_62_W	aggaattctacgctgagtGCTATAGAGGCTCAACAACATCTGTTGAAACTCACGGTCTGGGGCTGGAAACAGCTCCAGGCAAGGGTCCTGGCTGTGGAAAGATACCTAAGGtgatagcaagcttgcc	3	0	5	6	176	148
1233	BG505_gp41_62_C	aggaattctacgctgagtGCTATAGAGGCTCAACAACATCTGTTGAAACTCACGGTCTGGGGCTGCAAACAGCTCCAGGCAAGGGTCCTGGCTGTGGAAAGATACCTAAGGtgatagcaagcttgcc	0	0	12	0	30	35
1234	BG505_gp41_62_Y	aggaattctacgctgagtGCTATAGAGGCTCAACAACATCTGTTGAAACTCACGGTCTGGGGCTACAAACAGCTCCAGGCAAGGGTCCTGGCTGTGGAAAGATACCTAAGGtgatagcaagcttgcc	0	0	11	0	25	26
1235	BG505_gp41_62_L	aggaattctacgctgagtGCTATAGAGGCTCAACAACATCTGTTGAAACTCACGGTCTGGGGCCTGAAACAGCTCCAGGCAAGGGTCCTGGCTGTGGAAAGATACCTAAGGtgatagcaagcttgcc	0	0	14	0	8	1
1236	BG505_gp41_62_F	aggaattctacgctgagtGCTATAGAGGCTCAACAACATCTGTTGAAACTCACGGTCTGGGGCTTCAAACAGCTCCAGGCAAGGGTCCTGGCTGTGGAAAGATACCTAAGGtgatagcaagcttgcc	2	0	12	0	21	16
1237	BG505_gp41_62_Q	aggaattctacgctgagtGCTATAGAGGCTCAACAACATCTGTTGAAACTCACGGTCTGGGGCCAGAAACAGCTCCAGGCAAGGGTCCTGGCTGTGGAAAGATACCTAAGGtgatagcaagcttgcc	3	0	0	0	29	20
1238	BG505_gp41_62_H	aggaattctacgctgagtGCTATAGAGGCTCAACAACATCTGTTGAAACTCACGGTCTGGGGCCACAAACAGCTCCAGGCAAGGGTCCTGGCTGTGGAAAGATACCTAAGGtgatagcaagcttgcc	1	0	0	0	10	4
1239	BG505_gp41_62_P	aggaattctacgctgagtGCTATAGAGGCTCAACAACATCTGTTGAAACTCACGGTCTGGGGCCCGAAACAGCTCCAGGCAAGGGTCCTGGCTGTGGAAAGATACCTAAGGtgatagcaagcttgcc	0	1	9	0	35	19
1240	BG505_gp41_63_G	aggaattctacgctgagtATAGAGGCTCAACAACATCTGTTGAAACTCACGGTCTGGGGCATTGGTCAGCTCCAGGCAAGGGTCCTGGCTGTGGAAAGATACCTAAGGGATtgatagcaagcttgcc	0	0	0	0	23	6
1241	BG505_gp41_63_E	aggaattctacgctgagtATAGAGGCTCAACAACATCTGTTGAAACTCACGGTCTGGGGCATTGAACAGCTCCAGGCAAGGGTCCTGGCTGTGGAAAGATACCTAAGGGATtgatagcaagcttgcc	0	0	0	0	3	3
1242	BG505_gp41_63_D	aggaattctacgctgagtATAGAGGCTCAACAACATCTGTTGAAACTCACGGTCTGGGGCATTGACCAGCTCCAGGCAAGGGTCCTGGCTGTGGAAAGATACCTAAGGGATtgatagcaagcttgcc	1	0	0	0	52	34
1243	BG505_gp41_63_V	aggaattctacgctgagtATAGAGGCTCAACAACATCTGTTGAAACTCACGGTCTGGGGCATTGTTCAGCTCCAGGCAAGGGTCCTGGCTGTGGAAAGATACCTAAGGGATtgatagcaagcttgcc	1	0	3	0	15	25
1244	BG505_gp41_63_A	aggaattctacgctgagtATAGAGGCTCAACAACATCTGTTGAAACTCACGGTCTGGGGCATTGCTCAGCTCCAGGCAAGGGTCCTGGCTGTGGAAAGATACCTAAGGGATtgatagcaagcttgcc	0	0	0	0	7	4
1245	BG505_gp41_63_R	aggaattctacgctgagtATAGAGGCTCAACAACATCTGTTGAAACTCACGGTCTGGGGCATTCGTCAGCTCCAGGCAAGGGTCCTGGCTGTGGAAAGATACCTAAGGGATtgatagcaagcttgcc	0	0	2	0	22	20
1246	BG505_gp41_63_S	aggaattctacgctgagtATAGAGGCTCAACAACATCTGTTGAAACTCACGGTCTGGGGCATTTCTCAGCTCCAGGCAAGGGTCCTGGCTGTGGAAAGATACCTAAGGGATtgatagcaagcttgcc	0	1	0	0	66	60
1247	BG505_gp41_63_K	aggaattctacgctgagtATAGAGGCTCAACAACATCTGTTGAAACTCACGGTCTGGGGCATTAAACAGCTCCAGGCAAGGGTCCTGGCTGTGGAAAGATACCTAAGGGATtgatagcaagcttgcc	0	1	6	23	63	55
1248	BG505_gp41_63_N	aggaattctacgctgagtATAGAGGCTCAACAACATCTGTTGAAACTCACGGTCTGGGGCATTAACCAGCTCCAGGCAAGGGTCCTGGCTGTGGAAAGATACCTAAGGGATtgatagcaagcttgcc	0	0	0	0	13	4
1249	BG505_gp41_63_M	aggaattctacgctgagtATAGAGGCTCAACAACATCTGTTGAAACTCACGGTCTGGGGCATTATGCAGCTCCAGGCAAGGGTCCTGGCTGTGGAAAGATACCTAAGGGATtgatagcaagcttgcc	1	1	0	0	7	6
1250	BG505_gp41_63_I	aggaattctacgctgagtATAGAGGCTCAACAACATCTGTTGAAACTCACGGTCTGGGGCATTATCCAGCTCCAGGCAAGGGTCCTGGCTGTGGAAAGATACCTAAGGGATtgatagcaagcttgcc	0	0	9	11	55	43
1251	BG505_gp41_63_T	aggaattctacgctgagtATAGAGGCTCAACAACATCTGTTGAAACTCACGGTCTGGGGCATTACCCAGCTCCAGGCAAGGGTCCTGGCTGTGGAAAGATACCTAAGGGATtgatagcaagcttgcc	0	0	0	0	5	4
1252	BG505_gp41_63_W	aggaattctacgctgagtATAGAGGCTCAACAACATCTGTTGAAACTCACGGTCTGGGGCATTTGGCAGCTCCAGGCAAGGGTCCTGGCTGTGGAAAGATACCTAAGGGATtgatagcaagcttgcc	0	1	0	0	5	7
1253	BG505_gp41_63_C	aggaattctacgctgagtATAGAGGCTCAACAACATCTGTTGAAACTCACGGTCTGGGGCATTTGCCAGCTCCAGGCAAGGGTCCTGGCTGTGGAAAGATACCTAAGGGATtgatagcaagcttgcc	0	0	0	0	28	29
1254	BG505_gp41_63_Y	aggaattctacgctgagtATAGAGGCTCAACAACATCTGTTGAAACTCACGGTCTGGGGCATTTACCAGCTCCAGGCAAGGGTCCTGGCTGTGGAAAGATACCTAAGGGATtgatagcaagcttgcc	1	0	0	0	3	8
1255	BG505_gp41_63_L	aggaattctacgctgagtATAGAGGCTCAACAACATCTGTTGAAACTCACGGTCTGGGGCATTCTGCAGCTCCAGGCAAGGGTCCTGGCTGTGGAAAGATACCTAAGGGATtgatagcaagcttgcc	0	2	0	0	7	7
1256	BG505_gp41_63_F	aggaattctacgctgagtATAGAGGCTCAACAACATCTGTTGAAACTCACGGTCTGGGGCATTTTCCAGCTCCAGGCAAGGGTCCTGGCTGTGGAAAGATACCTAAGGGATtgatagcaagcttgcc	0	0	0	0	4	2
1257	BG505_gp41_63_Q	aggaattctacgctgagtATAGAGGCTCAACAACATCTGTTGAAACTCACGGTCTGGGGCATTCAGCAGCTCCAGGCAAGGGTCCTGGCTGTGGAAAGATACCTAAGGGATtgatagcaagcttgcc	1	2	0	0	5	3
1258	BG505_gp41_63_H	aggaattctacgctgagtATAGAGGCTCAACAACATCTGTTGAAACTCACGGTCTGGGGCATTCACCAGCTCCAGGCAAGGGTCCTGGCTGTGGAAAGATACCTAAGGGATtgatagcaagcttgcc	2	1	0	0	21	7
1259	BG505_gp41_63_P	aggaattctacgctgagtATAGAGGCTCAACAACATCTGTTGAAACTCACGGTCTGGGGCATTCCGCAGCTCCAGGCAAGGGTCCTGGCTGTGGAAAGATACCTAAGGGATtgatagcaagcttgcc	0	0	0	0	12	4
1260	BG505_gp41_64_G	aggaattctacgctgagtGAGGCTCAACAACATCTGTTGAAACTCACGGTCTGGGGCATTAAAGGTCTCCAGGCAAGGGTCCTGGCTGTGGAAAGATACCTAAGGGATCAAtgatagcaagcttgcc	0	0	12	0	110	71
1261	BG505_gp41_64_E	aggaattctacgctgagtGAGGCTCAACAACATCTGTTGAAACTCACGGTCTGGGGCATTAAAGAACTCCAGGCAAGGGTCCTGGCTGTGGAAAGATACCTAAGGGATCAAtgatagcaagcttgcc	0	3	0	0	37	21
1262	BG505_gp41_64_D	aggaattctacgctgagtGAGGCTCAACAACATCTGTTGAAACTCACGGTCTGGGGCATTAAAGACCTCCAGGCAAGGGTCCTGGCTGTGGAAAGATACCTAAGGGATCAAtgatagcaagcttgcc	0	4	0	0	58	31
1263	BG505_gp41_64_V	aggaattctacgctgagtGAGGCTCAACAACATCTGTTGAAACTCACGGTCTGGGGCATTAAAGTTCTCCAGGCAAGGGTCCTGGCTGTGGAAAGATACCTAAGGGATCAAtgatagcaagcttgcc	3	2	8	81	115	75
1264	BG505_gp41_64_A	aggaattctacgctgagtGAGGCTCAACAACATCTGTTGAAACTCACGGTCTGGGGCATTAAAGCTCTCCAGGCAAGGGTCCTGGCTGTGGAAAGATACCTAAGGGATCAAtgatagcaagcttgcc	5	2	8	3	255	187
1265	BG505_gp41_64_R	aggaattctacgctgagtGAGGCTCAACAACATCTGTTGAAACTCACGGTCTGGGGCATTAAACGTCTCCAGGCAAGGGTCCTGGCTGTGGAAAGATACCTAAGGGATCAAtgatagcaagcttgcc	3	0	14	4	84	49
1266	BG505_gp41_64_S	aggaattctacgctgagtGAGGCTCAACAACATCTGTTGAAACTCACGGTCTGGGGCATTAAATCTCTCCAGGCAAGGGTCCTGGCTGTGGAAAGATACCTAAGGGATCAAtgatagcaagcttgcc	2	2	0	0	91	74
1267	BG505_gp41_64_K	aggaattctacgctgagtGAGGCTCAACAACATCTGTTGAAACTCACGGTCTGGGGCATTAAAAAACTCCAGGCAAGGGTCCTGGCTGTGGAAAGATACCTAAGGGATCAAtgatagcaagcttgcc	2	4	15	0	106	72
1268	BG505_gp41_64_N	aggaattctacgctgagtGAGGCTCAACAACATCTGTTGAAACTCACGGTCTGGGGCATTAAAAACCTCCAGGCAAGGGTCCTGGCTGTGGAAAGATACCTAAGGGATCAAtgatagcaagcttgcc	1	0	8	0	60	48
1269	BG505_gp41_64_M	aggaattctacgctgagtGAGGCTCAACAACATCTGTTGAAACTCACGGTCTGGGGCATTAAAATGCTCCAGGCAAGGGTCCTGGCTGTGGAAAGATACCTAAGGGATCAAtgatagcaagcttgcc	2	1	0	0	43	24
1270	BG505_gp41_64_I	aggaattctacgctgagtGAGGCTCAACAACATCTGTTGAAACTCACGGTCTGGGGCATTAAAATCCTCCAGGCAAGGGTCCTGGCTGTGGAAAGATACCTAAGGGATCAAtgatagcaagcttgcc	0	0	5	30	57	49
1271	BG505_gp41_64_T	aggaattctacgctgagtGAGGCTCAACAACATCTGTTGAAACTCACGGTCTGGGGCATTAAAACCCTCCAGGCAAGGGTCCTGGCTGTGGAAAGATACCTAAGGGATCAAtgatagcaagcttgcc	0	1	16	24	124	89
1272	BG505_gp41_64_W	aggaattctacgctgagtGAGGCTCAACAACATCTGTTGAAACTCACGGTCTGGGGCATTAAATGGCTCCAGGCAAGGGTCCTGGCTGTGGAAAGATACCTAAGGGATCAAtgatagcaagcttgcc	4	5	2	0	246	214
1273	BG505_gp41_64_C	aggaattctacgctgagtGAGGCTCAACAACATCTGTTGAAACTCACGGTCTGGGGCATTAAATGCCTCCAGGCAAGGGTCCTGGCTGTGGAAAGATACCTAAGGGATCAAtgatagcaagcttgcc	3	4	1	17	59	41
1274	BG505_gp41_64_Y	aggaattctacgctgagtGAGGCTCAACAACATCTGTTGAAACTCACGGTCTGGGGCATTAAATACCTCCAGGCAAGGGTCCTGGCTGTGGAAAGATACCTAAGGGATCAAtgatagcaagcttgcc	0	2	0	3	65	48
1275	BG505_gp41_64_L	aggaattctacgctgagtGAGGCTCAACAACATCTGTTGAAACTCACGGTCTGGGGCATTAAACTGCTCCAGGCAAGGGTCCTGGCTGTGGAAAGATACCTAAGGGATCAAtgatagcaagcttgcc	0	3	2	0	105	82
1276	BG505_gp41_64_F	aggaattctacgctgagtGAGGCTCAACAACATCTGTTGAAACTCACGGTCTGGGGCATTAAATTCCTCCAGGCAAGGGTCCTGGCTGTGGAAAGATACCTAAGGGATCAAtgatagcaagcttgcc	4	5	6	6	125	77
1277	BG505_gp41_64_Q	aggaattctacgctgagtGAGGCTCAACAACATCTGTTGAAACTCACGGTCTGGGGCATTAAACAGCTCCAGGCAAGGGTCCTGGCTGTGGAAAGATACCTAAGGGATCAAtgatagcaagcttgcc	0	1	0	13	76	47
1278	BG505_gp41_64_H	aggaattctacgctgagtGAGGCTCAACAACATCTGTTGAAACTCACGGTCTGGGGCATTAAACACCTCCAGGCAAGGGTCCTGGCTGTGGAAAGATACCTAAGGGATCAAtgatagcaagcttgcc	7	9	34	4	284	212
1279	BG505_gp41_64_P	aggaattctacgctgagtGAGGCTCAACAACATCTGTTGAAACTCACGGTCTGGGGCATTAAACCGCTCCAGGCAAGGGTCCTGGCTGTGGAAAGATACCTAAGGGATCAAtgatagcaagcttgcc	0	0	0	10	44	51
1280	BG505_gp41_65_G	aggaattctacgctgagtGCTCAACAACATCTGTTGAAACTCACGGTCTGGGGCATTAAACAGGGTCAGGCAAGGGTCCTGGCTGTGGAAAGATACCTAAGGGATCAACAGtgatagcaagcttgcc	1	3	0	0	49	48
1281	BG505_gp41_65_E	aggaattctacgctgagtGCTCAACAACATCTGTTGAAACTCACGGTCTGGGGCATTAAACAGGAACAGGCAAGGGTCCTGGCTGTGGAAAGATACCTAAGGGATCAACAGtgatagcaagcttgcc	3	8	0	0	81	35
1282	BG505_gp41_65_D	aggaattctacgctgagtGCTCAACAACATCTGTTGAAACTCACGGTCTGGGGCATTAAACAGGACCAGGCAAGGGTCCTGGCTGTGGAAAGATACCTAAGGGATCAACAGtgatagcaagcttgcc	0	0	1	0	42	26
1283	BG505_gp41_65_V	aggaattctacgctgagtGCTCAACAACATCTGTTGAAACTCACGGTCTGGGGCATTAAACAGGTTCAGGCAAGGGTCCTGGCTGTGGAAAGATACCTAAGGGATCAACAGtgatagcaagcttgcc	0	1	0	0	53	46
1284	BG505_gp41_65_A	aggaattctacgctgagtGCTCAACAACATCTGTTGAAACTCACGGTCTGGGGCATTAAACAGGCTCAGGCAAGGGTCCTGGCTGTGGAAAGATACCTAAGGGATCAACAGtgatagcaagcttgcc	4	3	0	2	211	131
1285	BG505_gp41_65_R	aggaattctacgctgagtGCTCAACAACATCTGTTGAAACTCACGGTCTGGGGCATTAAACAGCGTCAGGCAAGGGTCCTGGCTGTGGAAAGATACCTAAGGGATCAACAGtgatagcaagcttgcc	4	4	10	6	132	103
1286	BG505_gp41_65_S	aggaattctacgctgagtGCTCAACAACATCTGTTGAAACTCACGGTCTGGGGCATTAAACAGTCTCAGGCAAGGGTCCTGGCTGTGGAAAGATACCTAAGGGATCAACAGtgatagcaagcttgcc	1	5	8	0	67	65
1287	BG505_gp41_65_K	aggaattctacgctgagtGCTCAACAACATCTGTTGAAACTCACGGTCTGGGGCATTAAACAGAAACAGGCAAGGGTCCTGGCTGTGGAAAGATACCTAAGGGATCAACAGtgatagcaagcttgcc	2	0	13	0	103	78
1288	BG505_gp41_65_N	aggaattctacgctgagtGCTCAACAACATCTGTTGAAACTCACGGTCTGGGGCATTAAACAGAACCAGGCAAGGGTCCTGGCTGTGGAAAGATACCTAAGGGATCAACAGtgatagcaagcttgcc	8	3	10	4	203	154
1289	BG505_gp41_65_M	aggaattctacgctgagtGCTCAACAACATCTGTTGAAACTCACGGTCTGGGGCATTAAACAGATGCAGGCAAGGGTCCTGGCTGTGGAAAGATACCTAAGGGATCAACAGtgatagcaagcttgcc	1	0	0	0	15	21
1290	BG505_gp41_65_I	aggaattctacgctgagtGCTCAACAACATCTGTTGAAACTCACGGTCTGGGGCATTAAACAGATCCAGGCAAGGGTCCTGGCTGTGGAAAGATACCTAAGGGATCAACAGtgatagcaagcttgcc	1	1	1	7	102	73
1291	BG505_gp41_65_T	aggaattctacgctgagtGCTCAACAACATCTGTTGAAACTCACGGTCTGGGGCATTAAACAGACCCAGGCAAGGGTCCTGGCTGTGGAAAGATACCTAAGGGATCAACAGtgatagcaagcttgcc	4	6	17	1	218	161
1292	BG505_gp41_65_W	aggaattctacgctgagtGCTCAACAACATCTGTTGAAACTCACGGTCTGGGGCATTAAACAGTGGCAGGCAAGGGTCCTGGCTGTGGAAAGATACCTAAGGGATCAACAGtgatagcaagcttgcc	1	2	6	0	83	53
1293	BG505_gp41_65_C	aggaattctacgctgagtGCTCAACAACATCTGTTGAAACTCACGGTCTGGGGCATTAAACAGTGCCAGGCAAGGGTCCTGGCTGTGGAAAGATACCTAAGGGATCAACAGtgatagcaagcttgcc	1	3	0	0	92	59
1294	BG505_gp41_65_Y	aggaattctacgctgagtGCTCAACAACATCTGTTGAAACTCACGGTCTGGGGCATTAAACAGTACCAGGCAAGGGTCCTGGCTGTGGAAAGATACCTAAGGGATCAACAGtgatagcaagcttgcc	1	1	1	0	62	54
1295	BG505_gp41_65_L	aggaattctacgctgagtGCTCAACAACATCTGTTGAAACTCACGGTCTGGGGCATTAAACAGCTGCAGGCAAGGGTCCTGGCTGTGGAAAGATACCTAAGGGATCAACAGtgatagcaagcttgcc	0	4	0	1	53	25
1296	BG505_gp41_65_F	aggaattctacgctgagtGCTCAACAACATCTGTTGAAACTCACGGTCTGGGGCATTAAACAGTTCCAGGCAAGGGTCCTGGCTGTGGAAAGATACCTAAGGGATCAACAGtgatagcaagcttgcc	1	3	0	11	31	22
1297	BG505_gp41_65_Q	aggaattctacgctgagtGCTCAACAACATCTGTTGAAACTCACGGTCTGGGGCATTAAACAGCAGCAGGCAAGGGTCCTGGCTGTGGAAAGATACCTAAGGGATCAACAGtgatagcaagcttgcc	12	7	6	16	304	199
1298	BG505_gp41_65_H	aggaattctacgctgagtGCTCAACAACATCTGTTGAAACTCACGGTCTGGGGCATTAAACAGCACCAGGCAAGGGTCCTGGCTGTGGAAAGATACCTAAGGGATCAACAGtgatagcaagcttgcc	2	0	0	8	152	101
1299	BG505_gp41_65_P	aggaattctacgctgagtGCTCAACAACATCTGTTGAAACTCACGGTCTGGGGCATTAAACAGCCGCAGGCAAGGGTCCTGGCTGTGGAAAGATACCTAAGGGATCAACAGtgatagcaagcttgcc	3	6	0	11	145	95
1300	BG505_gp41_66_G	aggaattctacgctgagtCAACAACATCTGTTGAAACTCACGGTCTGGGGCATTAAACAGCTCGGTGCAAGGGTCCTGGCTGTGGAAAGATACCTAAGGGATCAACAGCTTtgatagcaagcttgcc	1	0	5	0	11	16
1301	BG505_gp41_66_E	aggaattctacgctgagtCAACAACATCTGTTGAAACTCACGGTCTGGGGCATTAAACAGCTCGAAGCAAGGGTCCTGGCTGTGGAAAGATACCTAAGGGATCAACAGCTTtgatagcaagcttgcc	0	1	5	0	29	21
1302	BG505_gp41_66_D	aggaattctacgctgagtCAACAACATCTGTTGAAACTCACGGTCTGGGGCATTAAACAGCTCGACGCAAGGGTCCTGGCTGTGGAAAGATACCTAAGGGATCAACAGCTTtgatagcaagcttgcc	0	0	0	0	45	19
1303	BG505_gp41_66_V	aggaattctacgctgagtCAACAACATCTGTTGAAACTCACGGTCTGGGGCATTAAACAGCTCGTTGCAAGGGTCCTGGCTGTGGAAAGATACCTAAGGGATCAACAGCTTtgatagcaagcttgcc	1	0	0	0	20	9
1304	BG505_gp41_66_A	aggaattctacgctgagtCAACAACATCTGTTGAAACTCACGGTCTGGGGCATTAAACAGCTCGCTGCAAGGGTCCTGGCTGTGGAAAGATACCTAAGGGATCAACAGCTTtgatagcaagcttgcc	0	0	1	0	37	34
1305	BG505_gp41_66_R	aggaattctacgctgagtCAACAACATCTGTTGAAACTCACGGTCTGGGGCATTAAACAGCTCCGTGCAAGGGTCCTGGCTGTGGAAAGATACCTAAGGGATCAACAGCTTtgatagcaagcttgcc	2	0	12	0	89	55
1306	BG505_gp41_66_S	aggaattctacgctgagtCAACAACATCTGTTGAAACTCACGGTCTGGGGCATTAAACAGCTCTCTGCAAGGGTCCTGGCTGTGGAAAGATACCTAAGGGATCAACAGCTTtgatagcaagcttgcc	1	0	1	0	37	21
1307	BG505_gp41_66_K	aggaattctacgctgagtCAACAACATCTGTTGAAACTCACGGTCTGGGGCATTAAACAGCTCAAAGCAAGGGTCCTGGCTGTGGAAAGATACCTAAGGGATCAACAGCTTtgatagcaagcttgcc	0	2	0	0	56	40
1308	BG505_gp41_66_N	aggaattctacgctgagtCAACAACATCTGTTGAAACTCACGGTCTGGGGCATTAAACAGCTCAACGCAAGGGTCCTGGCTGTGGAAAGATACCTAAGGGATCAACAGCTTtgatagcaagcttgcc	3	2	1	32	104	77
1309	BG505_gp41_66_M	aggaattctacgctgagtCAACAACATCTGTTGAAACTCACGGTCTGGGGCATTAAACAGCTCATGGCAAGGGTCCTGGCTGTGGAAAGATACCTAAGGGATCAACAGCTTtgatagcaagcttgcc	2	0	0	0	67	60
1310	BG505_gp41_66_I	aggaattctacgctgagtCAACAACATCTGTTGAAACTCACGGTCTGGGGCATTAAACAGCTCATCGCAAGGGTCCTGGCTGTGGAAAGATACCTAAGGGATCAACAGCTTtgatagcaagcttgcc	0	2	0	0	22	27
1311	BG505_gp41_66_T	aggaattctacgctgagtCAACAACATCTGTTGAAACTCACGGTCTGGGGCATTAAACAGCTCACCGCAAGGGTCCTGGCTGTGGAAAGATACCTAAGGGATCAACAGCTTtgatagcaagcttgcc	0	1	2	0	65	39
1312	BG505_gp41_66_W	aggaattctacgctgagtCAACAACATCTGTTGAAACTCACGGTCTGGGGCATTAAACAGCTCTGGGCAAGGGTCCTGGCTGTGGAAAGATACCTAAGGGATCAACAGCTTtgatagcaagcttgcc	0	0	16	12	40	45
1313	BG505_gp41_66_C	aggaattctacgctgagtCAACAACATCTGTTGAAACTCACGGTCTGGGGCATTAAACAGCTCTGCGCAAGGGTCCTGGCTGTGGAAAGATACCTAAGGGATCAACAGCTTtgatagcaagcttgcc	0	2	9	0	28	27
1314	BG505_gp41_66_Y	aggaattctacgctgagtCAACAACATCTGTTGAAACTCACGGTCTGGGGCATTAAACAGCTCTACGCAAGGGTCCTGGCTGTGGAAAGATACCTAAGGGATCAACAGCTTtgatagcaagcttgcc	2	1	3	0	109	79
1315	BG505_gp41_66_L	aggaattctacgctgagtCAACAACATCTGTTGAAACTCACGGTCTGGGGCATTAAACAGCTCCTGGCAAGGGTCCTGGCTGTGGAAAGATACCTAAGGGATCAACAGCTTtgatagcaagcttgcc	0	0	0	0	37	49
1316	BG505_gp41_66_F	aggaattctacgctgagtCAACAACATCTGTTGAAACTCACGGTCTGGGGCATTAAACAGCTCTTCGCAAGGGTCCTGGCTGTGGAAAGATACCTAAGGGATCAACAGCTTtgatagcaagcttgcc	5	2	21	3	165	116
1317	BG505_gp41_66_Q	aggaattctacgctgagtCAACAACATCTGTTGAAACTCACGGTCTGGGGCATTAAACAGCTCCAGGCAAGGGTCCTGGCTGTGGAAAGATACCTAAGGGATCAACAGCTTtgatagcaagcttgcc	2	2	11	42	148	89
1318	BG505_gp41_66_H	aggaattctacgctgagtCAACAACATCTGTTGAAACTCACGGTCTGGGGCATTAAACAGCTCCACGCAAGGGTCCTGGCTGTGGAAAGATACCTAAGGGATCAACAGCTTtgatagcaagcttgcc	1	1	7	0	51	39
1319	BG505_gp41_66_P	aggaattctacgctgagtCAACAACATCTGTTGAAACTCACGGTCTGGGGCATTAAACAGCTCCCGGCAAGGGTCCTGGCTGTGGAAAGATACCTAAGGGATCAACAGCTTtgatagcaagcttgcc	1	1	0	0	89	57
1320	BG505_gp41_67_G	aggaattctacgctgagtCAACATCTGTTGAAACTCACGGTCTGGGGCATTAAACAGCTCCAGGGTAGGGTCCTGGCTGTGGAAAGATACCTAAGGGATCAACAGCTTCTAtgatagcaagcttgcc	0	1	12	0	14	11
1321	BG505_gp41_67_E	aggaattctacgctgagtCAACATCTGTTGAAACTCACGGTCTGGGGCATTAAACAGCTCCAGGAAAGGGTCCTGGCTGTGGAAAGATACCTAAGGGATCAACAGCTTCTAtgatagcaagcttgcc	3	1	2	9	68	49
1322	BG505_gp41_67_D	aggaattctacgctgagtCAACATCTGTTGAAACTCACGGTCTGGGGCATTAAACAGCTCCAGGACAGGGTCCTGGCTGTGGAAAGATACCTAAGGGATCAACAGCTTCTAtgatagcaagcttgcc	0	0	0	0	6	3
1323	BG505_gp41_67_V	aggaattctacgctgagtCAACATCTGTTGAAACTCACGGTCTGGGGCATTAAACAGCTCCAGGTTAGGGTCCTGGCTGTGGAAAGATACCTAAGGGATCAACAGCTTCTAtgatagcaagcttgcc	0	0	0	14	19	18
1324	BG505_gp41_67_A	aggaattctacgctgagtCAACATCTGTTGAAACTCACGGTCTGGGGCATTAAACAGCTCCAGGCTAGGGTCCTGGCTGTGGAAAGATACCTAAGGGATCAACAGCTTCTAtgatagcaagcttgcc	3	2	0	0	40	34
1325	BG505_gp41_67_R	aggaattctacgctgagtCAACATCTGTTGAAACTCACGGTCTGGGGCATTAAACAGCTCCAGCGTAGGGTCCTGGCTGTGGAAAGATACCTAAGGGATCAACAGCTTCTAtgatagcaagcttgcc	0	0	4	1	31	15
1326	BG505_gp41_67_S	aggaattctacgctgagtCAACATCTGTTGAAACTCACGGTCTGGGGCATTAAACAGCTCCAGTCTAGGGTCCTGGCTGTGGAAAGATACCTAAGGGATCAACAGCTTCTAtgatagcaagcttgcc	1	6	1	0	29	21
1327	BG505_gp41_67_K	aggaattctacgctgagtCAACATCTGTTGAAACTCACGGTCTGGGGCATTAAACAGCTCCAGAAAAGGGTCCTGGCTGTGGAAAGATACCTAAGGGATCAACAGCTTCTAtgatagcaagcttgcc	0	0	0	6	16	13
1328	BG505_gp41_67_N	aggaattctacgctgagtCAACATCTGTTGAAACTCACGGTCTGGGGCATTAAACAGCTCCAGAACAGGGTCCTGGCTGTGGAAAGATACCTAAGGGATCAACAGCTTCTAtgatagcaagcttgcc	0	0	7	3	18	17
1329	BG505_gp41_67_M	aggaattctacgctgagtCAACATCTGTTGAAACTCACGGTCTGGGGCATTAAACAGCTCCAGATGAGGGTCCTGGCTGTGGAAAGATACCTAAGGGATCAACAGCTTCTAtgatagcaagcttgcc	0	0	2	1	98	107
1330	BG505_gp41_67_I	aggaattctacgctgagtCAACATCTGTTGAAACTCACGGTCTGGGGCATTAAACAGCTCCAGATCAGGGTCCTGGCTGTGGAAAGATACCTAAGGGATCAACAGCTTCTAtgatagcaagcttgcc	1	0	0	12	17	14
1331	BG505_gp41_67_T	aggaattctacgctgagtCAACATCTGTTGAAACTCACGGTCTGGGGCATTAAACAGCTCCAGACCAGGGTCCTGGCTGTGGAAAGATACCTAAGGGATCAACAGCTTCTAtgatagcaagcttgcc	1	0	0	0	26	15
1332	BG505_gp41_67_W	aggaattctacgctgagtCAACATCTGTTGAAACTCACGGTCTGGGGCATTAAACAGCTCCAGTGGAGGGTCCTGGCTGTGGAAAGATACCTAAGGGATCAACAGCTTCTAtgatagcaagcttgcc	0	1	4	0	24	23
1333	BG505_gp41_67_C	aggaattctacgctgagtCAACATCTGTTGAAACTCACGGTCTGGGGCATTAAACAGCTCCAGTGCAGGGTCCTGGCTGTGGAAAGATACCTAAGGGATCAACAGCTTCTAtgatagcaagcttgcc	1	0	1	0	71	44
1334	BG505_gp41_67_Y	aggaattctacgctgagtCAACATCTGTTGAAACTCACGGTCTGGGGCATTAAACAGCTCCAGTACAGGGTCCTGGCTGTGGAAAGATACCTAAGGGATCAACAGCTTCTAtgatagcaagcttgcc	0	0	0	0	5	5
1335	BG505_gp41_67_L	aggaattctacgctgagtCAACATCTGTTGAAACTCACGGTCTGGGGCATTAAACAGCTCCAGCTGAGGGTCCTGGCTGTGGAAAGATACCTAAGGGATCAACAGCTTCTAtgatagcaagcttgcc	0	3	0	0	81	42
1336	BG505_gp41_67_F	aggaattctacgctgagtCAACATCTGTTGAAACTCACGGTCTGGGGCATTAAACAGCTCCAGTTCAGGGTCCTGGCTGTGGAAAGATACCTAAGGGATCAACAGCTTCTAtgatagcaagcttgcc	0	2	1	0	28	29
1337	BG505_gp41_67_Q	aggaattctacgctgagtCAACATCTGTTGAAACTCACGGTCTGGGGCATTAAACAGCTCCAGCAGAGGGTCCTGGCTGTGGAAAGATACCTAAGGGATCAACAGCTTCTAtgatagcaagcttgcc	0	0	0	0	29	27
1338	BG505_gp41_67_H	aggaattctacgctgagtCAACATCTGTTGAAACTCACGGTCTGGGGCATTAAACAGCTCCAGCACAGGGTCCTGGCTGTGGAAAGATACCTAAGGGATCAACAGCTTCTAtgatagcaagcttgcc	1	4	0	0	12	7
1339	BG505_gp41_67_P	aggaattctacgctgagtCAACATCTGTTGAAACTCACGGTCTGGGGCATTAAACAGCTCCAGCCGAGGGTCCTGGCTGTGGAAAGATACCTAAGGGATCAACAGCTTCTAtgatagcaagcttgcc	4	3	2	2	122	87
1340	BG505_gp41_68_G	aggaattctacgctgagtCATCTGTTGAAACTCACGGTCTGGGGCATTAAACAGCTCCAGGCAGGTGTCCTGGCTGTGGAAAGATACCTAAGGGATCAACAGCTTCTAGGAtgatagcaagcttgcc	3	1	0	0	77	49
1341	BG505_gp41_68_E	aggaattctacgctgagtCATCTGTTGAAACTCACGGTCTGGGGCATTAAACAGCTCCAGGCAGAAGTCCTGGCTGTGGAAAGATACCTAAGGGATCAACAGCTTCTAGGAtgatagcaagcttgcc	0	0	0	0	10	12
1342	BG505_gp41_68_D	aggaattctacgctgagtCATCTGTTGAAACTCACGGTCTGGGGCATTAAACAGCTCCAGGCAGACGTCCTGGCTGTGGAAAGATACCTAAGGGATCAACAGCTTCTAGGAtgatagcaagcttgcc	0	0	2	0	7	7
1343	BG505_gp41_68_V	aggaattctacgctgagtCATCTGTTGAAACTCACGGTCTGGGGCATTAAACAGCTCCAGGCAGTTGTCCTGGCTGTGGAAAGATACCTAAGGGATCAACAGCTTCTAGGAtgatagcaagcttgcc	3	2	3	0	42	23
1344	BG505_gp41_68_A	aggaattctacgctgagtCATCTGTTGAAACTCACGGTCTGGGGCATTAAACAGCTCCAGGCAGCTGTCCTGGCTGTGGAAAGATACCTAAGGGATCAACAGCTTCTAGGAtgatagcaagcttgcc	1	0	0	0	29	13
1345	BG505_gp41_68_R	aggaattctacgctgagtCATCTGTTGAAACTCACGGTCTGGGGCATTAAACAGCTCCAGGCACGTGTCCTGGCTGTGGAAAGATACCTAAGGGATCAACAGCTTCTAGGAtgatagcaagcttgcc	1	0	0	0	53	32
1346	BG505_gp41_68_S	aggaattctacgctgagtCATCTGTTGAAACTCACGGTCTGGGGCATTAAACAGCTCCAGGCATCTGTCCTGGCTGTGGAAAGATACCTAAGGGATCAACAGCTTCTAGGAtgatagcaagcttgcc	0	0	0	0	32	27
1347	BG505_gp41_68_K	aggaattctacgctgagtCATCTGTTGAAACTCACGGTCTGGGGCATTAAACAGCTCCAGGCAAAAGTCCTGGCTGTGGAAAGATACCTAAGGGATCAACAGCTTCTAGGAtgatagcaagcttgcc	0	0	0	0	13	6
1348	BG505_gp41_68_N	aggaattctacgctgagtCATCTGTTGAAACTCACGGTCTGGGGCATTAAACAGCTCCAGGCAAACGTCCTGGCTGTGGAAAGATACCTAAGGGATCAACAGCTTCTAGGAtgatagcaagcttgcc	0	0	0	0	36	14
1349	BG505_gp41_68_M	aggaattctacgctgagtCATCTGTTGAAACTCACGGTCTGGGGCATTAAACAGCTCCAGGCAATGGTCCTGGCTGTGGAAAGATACCTAAGGGATCAACAGCTTCTAGGAtgatagcaagcttgcc	2	1	2	0	61	46
1350	BG505_gp41_68_I	aggaattctacgctgagtCATCTGTTGAAACTCACGGTCTGGGGCATTAAACAGCTCCAGGCAATCGTCCTGGCTGTGGAAAGATACCTAAGGGATCAACAGCTTCTAGGAtgatagcaagcttgcc	1	0	0	17	73	54
1351	BG505_gp41_68_T	aggaattctacgctgagtCATCTGTTGAAACTCACGGTCTGGGGCATTAAACAGCTCCAGGCAACCGTCCTGGCTGTGGAAAGATACCTAAGGGATCAACAGCTTCTAGGAtgatagcaagcttgcc	1	1	0	0	21	21
1352	BG505_gp41_68_W	aggaattctacgctgagtCATCTGTTGAAACTCACGGTCTGGGGCATTAAACAGCTCCAGGCATGGGTCCTGGCTGTGGAAAGATACCTAAGGGATCAACAGCTTCTAGGAtgatagcaagcttgcc	0	0	2	0	24	14
1353	BG505_gp41_68_C	aggaattctacgctgagtCATCTGTTGAAACTCACGGTCTGGGGCATTAAACAGCTCCAGGCATGCGTCCTGGCTGTGGAAAGATACCTAAGGGATCAACAGCTTCTAGGAtgatagcaagcttgcc	0	1	0	0	15	7
1354	BG505_gp41_68_Y	aggaattctacgctgagtCATCTGTTGAAACTCACGGTCTGGGGCATTAAACAGCTCCAGGCATACGTCCTGGCTGTGGAAAGATACCTAAGGGATCAACAGCTTCTAGGAtgatagcaagcttgcc	0	0	0	0	20	16
1355	BG505_gp41_68_L	aggaattctacgctgagtCATCTGTTGAAACTCACGGTCTGGGGCATTAAACAGCTCCAGGCACTGGTCCTGGCTGTGGAAAGATACCTAAGGGATCAACAGCTTCTAGGAtgatagcaagcttgcc	1	0	7	12	34	38
1356	BG505_gp41_68_F	aggaattctacgctgagtCATCTGTTGAAACTCACGGTCTGGGGCATTAAACAGCTCCAGGCATTCGTCCTGGCTGTGGAAAGATACCTAAGGGATCAACAGCTTCTAGGAtgatagcaagcttgcc	1	1	2	4	82	59
1357	BG505_gp41_68_Q	aggaattctacgctgagtCATCTGTTGAAACTCACGGTCTGGGGCATTAAACAGCTCCAGGCACAGGTCCTGGCTGTGGAAAGATACCTAAGGGATCAACAGCTTCTAGGAtgatagcaagcttgcc	1	1	0	0	18	13
1358	BG505_gp41_68_H	aggaattctacgctgagtCATCTGTTGAAACTCACGGTCTGGGGCATTAAACAGCTCCAGGCACACGTCCTGGCTGTGGAAAGATACCTAAGGGATCAACAGCTTCTAGGAtgatagcaagcttgcc	0	0	2	0	25	26
1359	BG505_gp41_68_P	aggaattctacgctgagtCATCTGTTGAAACTCACGGTCTGGGGCATTAAACAGCTCCAGGCACCGGTCCTGGCTGTGGAAAGATACCTAAGGGATCAACAGCTTCTAGGAtgatagcaagcttgcc	0	0	0	0	24	16
1360	BG505_gp41_69_G	aggaattctacgctgagtCTGTTGAAACTCACGGTCTGGGGCATTAAACAGCTCCAGGCAAGGGGTCTGGCTGTGGAAAGATACCTAAGGGATCAACAGCTTCTAGGAATTtgatagcaagcttgcc	2	1	20	6	71	61
1361	BG505_gp41_69_E	aggaattctacgctgagtCTGTTGAAACTCACGGTCTGGGGCATTAAACAGCTCCAGGCAAGGGAACTGGCTGTGGAAAGATACCTAAGGGATCAACAGCTTCTAGGAATTtgatagcaagcttgcc	1	0	28	32	304	210
1362	BG505_gp41_69_D	aggaattctacgctgagtCTGTTGAAACTCACGGTCTGGGGCATTAAACAGCTCCAGGCAAGGGACCTGGCTGTGGAAAGATACCTAAGGGATCAACAGCTTCTAGGAATTtgatagcaagcttgcc	1	0	1	5	52	34
1363	BG505_gp41_69_V	aggaattctacgctgagtCTGTTGAAACTCACGGTCTGGGGCATTAAACAGCTCCAGGCAAGGGTTCTGGCTGTGGAAAGATACCTAAGGGATCAACAGCTTCTAGGAATTtgatagcaagcttgcc	0	0	1	11	57	57
1364	BG505_gp41_69_A	aggaattctacgctgagtCTGTTGAAACTCACGGTCTGGGGCATTAAACAGCTCCAGGCAAGGGCTCTGGCTGTGGAAAGATACCTAAGGGATCAACAGCTTCTAGGAATTtgatagcaagcttgcc	1	0	5	7	90	67
1365	BG505_gp41_69_R	aggaattctacgctgagtCTGTTGAAACTCACGGTCTGGGGCATTAAACAGCTCCAGGCAAGGCGTCTGGCTGTGGAAAGATACCTAAGGGATCAACAGCTTCTAGGAATTtgatagcaagcttgcc	0	3	18	9	134	79
1366	BG505_gp41_69_S	aggaattctacgctgagtCTGTTGAAACTCACGGTCTGGGGCATTAAACAGCTCCAGGCAAGGTCTCTGGCTGTGGAAAGATACCTAAGGGATCAACAGCTTCTAGGAATTtgatagcaagcttgcc	2	1	8	33	99	77
1367	BG505_gp41_69_K	aggaattctacgctgagtCTGTTGAAACTCACGGTCTGGGGCATTAAACAGCTCCAGGCAAGGAAACTGGCTGTGGAAAGATACCTAAGGGATCAACAGCTTCTAGGAATTtgatagcaagcttgcc	5	4	20	34	320	229
1368	BG505_gp41_69_N	aggaattctacgctgagtCTGTTGAAACTCACGGTCTGGGGCATTAAACAGCTCCAGGCAAGGAACCTGGCTGTGGAAAGATACCTAAGGGATCAACAGCTTCTAGGAATTtgatagcaagcttgcc	4	3	24	0	212	166
1369	BG505_gp41_69_M	aggaattctacgctgagtCTGTTGAAACTCACGGTCTGGGGCATTAAACAGCTCCAGGCAAGGATGCTGGCTGTGGAAAGATACCTAAGGGATCAACAGCTTCTAGGAATTtgatagcaagcttgcc	4	7	7	6	191	115
1370	BG505_gp41_69_I	aggaattctacgctgagtCTGTTGAAACTCACGGTCTGGGGCATTAAACAGCTCCAGGCAAGGATCCTGGCTGTGGAAAGATACCTAAGGGATCAACAGCTTCTAGGAATTtgatagcaagcttgcc	0	2	4	0	51	37
1371	BG505_gp41_69_T	aggaattctacgctgagtCTGTTGAAACTCACGGTCTGGGGCATTAAACAGCTCCAGGCAAGGACCCTGGCTGTGGAAAGATACCTAAGGGATCAACAGCTTCTAGGAATTtgatagcaagcttgcc	0	4	8	19	96	72
1372	BG505_gp41_69_W	aggaattctacgctgagtCTGTTGAAACTCACGGTCTGGGGCATTAAACAGCTCCAGGCAAGGTGGCTGGCTGTGGAAAGATACCTAAGGGATCAACAGCTTCTAGGAATTtgatagcaagcttgcc	0	1	25	20	76	91
1373	BG505_gp41_69_C	aggaattctacgctgagtCTGTTGAAACTCACGGTCTGGGGCATTAAACAGCTCCAGGCAAGGTGCCTGGCTGTGGAAAGATACCTAAGGGATCAACAGCTTCTAGGAATTtgatagcaagcttgcc	1	4	8	0	93	49
1374	BG505_gp41_69_Y	aggaattctacgctgagtCTGTTGAAACTCACGGTCTGGGGCATTAAACAGCTCCAGGCAAGGTACCTGGCTGTGGAAAGATACCTAAGGGATCAACAGCTTCTAGGAATTtgatagcaagcttgcc	3	0	39	28	163	109
1375	BG505_gp41_69_L	aggaattctacgctgagtCTGTTGAAACTCACGGTCTGGGGCATTAAACAGCTCCAGGCAAGGCTGCTGGCTGTGGAAAGATACCTAAGGGATCAACAGCTTCTAGGAATTtgatagcaagcttgcc	3	1	1	0	121	66
1376	BG505_gp41_69_F	aggaattctacgctgagtCTGTTGAAACTCACGGTCTGGGGCATTAAACAGCTCCAGGCAAGGTTCCTGGCTGTGGAAAGATACCTAAGGGATCAACAGCTTCTAGGAATTtgatagcaagcttgcc	0	0	18	14	82	80
1377	BG505_gp41_69_Q	aggaattctacgctgagtCTGTTGAAACTCACGGTCTGGGGCATTAAACAGCTCCAGGCAAGGCAGCTGGCTGTGGAAAGATACCTAAGGGATCAACAGCTTCTAGGAATTtgatagcaagcttgcc	1	0	18	20	84	77
1378	BG505_gp41_69_H	aggaattctacgctgagtCTGTTGAAACTCACGGTCTGGGGCATTAAACAGCTCCAGGCAAGGCACCTGGCTGTGGAAAGATACCTAAGGGATCAACAGCTTCTAGGAATTtgatagcaagcttgcc	0	1	18	2	86	71
1379	BG505_gp41_69_P	aggaattctacgctgagtCTGTTGAAACTCACGGTCTGGGGCATTAAACAGCTCCAGGCAAGGCCGCTGGCTGTGGAAAGATACCTAAGGGATCAACAGCTTCTAGGAATTtgatagcaagcttgcc	2	0	17	1	112	85
1380	BG505_gp41_70_G	aggaattctacgctgagtTTGAAACTCACGGTCTGGGGCATTAAACAGCTCCAGGCAAGGGTCGGTGCTGTGGAAAGATACCTAAGGGATCAACAGCTTCTAGGAATTTGGtgatagcaagcttgcc	1	0	28	0	59	55
1381	BG505_gp41_70_E	aggaattctacgctgagtTTGAAACTCACGGTCTGGGGCATTAAACAGCTCCAGGCAAGGGTCGAAGCTGTGGAAAGATACCTAAGGGATCAACAGCTTCTAGGAATTTGGtgatagcaagcttgcc	0	0	0	0	14	11
1382	BG505_gp41_70_D	aggaattctacgctgagtTTGAAACTCACGGTCTGGGGCATTAAACAGCTCCAGGCAAGGGTCGACGCTGTGGAAAGATACCTAAGGGATCAACAGCTTCTAGGAATTTGGtgatagcaagcttgcc	0	0	1	2	40	27
1383	BG505_gp41_70_V	aggaattctacgctgagtTTGAAACTCACGGTCTGGGGCATTAAACAGCTCCAGGCAAGGGTCGTTGCTGTGGAAAGATACCTAAGGGATCAACAGCTTCTAGGAATTTGGtgatagcaagcttgcc	0	0	0	0	38	17
1384	BG505_gp41_70_A	aggaattctacgctgagtTTGAAACTCACGGTCTGGGGCATTAAACAGCTCCAGGCAAGGGTCGCTGCTGTGGAAAGATACCTAAGGGATCAACAGCTTCTAGGAATTTGGtgatagcaagcttgcc	0	0	2	2	20	13
1385	BG505_gp41_70_R	aggaattctacgctgagtTTGAAACTCACGGTCTGGGGCATTAAACAGCTCCAGGCAAGGGTCCGTGCTGTGGAAAGATACCTAAGGGATCAACAGCTTCTAGGAATTTGGtgatagcaagcttgcc	0	0	0	1	44	31
1386	BG505_gp41_70_S	aggaattctacgctgagtTTGAAACTCACGGTCTGGGGCATTAAACAGCTCCAGGCAAGGGTCTCTGCTGTGGAAAGATACCTAAGGGATCAACAGCTTCTAGGAATTTGGtgatagcaagcttgcc	0	2	27	30	118	75
1387	BG505_gp41_70_K	aggaattctacgctgagtTTGAAACTCACGGTCTGGGGCATTAAACAGCTCCAGGCAAGGGTCAAAGCTGTGGAAAGATACCTAAGGGATCAACAGCTTCTAGGAATTTGGtgatagcaagcttgcc	2	0	1	0	49	27
1388	BG505_gp41_70_N	aggaattctacgctgagtTTGAAACTCACGGTCTGGGGCATTAAACAGCTCCAGGCAAGGGTCAACGCTGTGGAAAGATACCTAAGGGATCAACAGCTTCTAGGAATTTGGtgatagcaagcttgcc	3	1	2	6	84	59
1389	BG505_gp41_70_M	aggaattctacgctgagtTTGAAACTCACGGTCTGGGGCATTAAACAGCTCCAGGCAAGGGTCATGGCTGTGGAAAGATACCTAAGGGATCAACAGCTTCTAGGAATTTGGtgatagcaagcttgcc	0	0	15	1	86	72
1390	BG505_gp41_70_I	aggaattctacgctgagtTTGAAACTCACGGTCTGGGGCATTAAACAGCTCCAGGCAAGGGTCATCGCTGTGGAAAGATACCTAAGGGATCAACAGCTTCTAGGAATTTGGtgatagcaagcttgcc	1	0	6	11	37	15
1391	BG505_gp41_70_T	aggaattctacgctgagtTTGAAACTCACGGTCTGGGGCATTAAACAGCTCCAGGCAAGGGTCACCGCTGTGGAAAGATACCTAAGGGATCAACAGCTTCTAGGAATTTGGtgatagcaagcttgcc	0	0	0	0	21	17
1392	BG505_gp41_70_W	aggaattctacgctgagtTTGAAACTCACGGTCTGGGGCATTAAACAGCTCCAGGCAAGGGTCTGGGCTGTGGAAAGATACCTAAGGGATCAACAGCTTCTAGGAATTTGGtgatagcaagcttgcc	1	0	0	0	26	16
1393	BG505_gp41_70_C	aggaattctacgctgagtTTGAAACTCACGGTCTGGGGCATTAAACAGCTCCAGGCAAGGGTCTGCGCTGTGGAAAGATACCTAAGGGATCAACAGCTTCTAGGAATTTGGtgatagcaagcttgcc	0	0	5	0	10	13
1394	BG505_gp41_70_Y	aggaattctacgctgagtTTGAAACTCACGGTCTGGGGCATTAAACAGCTCCAGGCAAGGGTCTACGCTGTGGAAAGATACCTAAGGGATCAACAGCTTCTAGGAATTTGGtgatagcaagcttgcc	0	1	0	0	12	5
1395	BG505_gp41_70_L	aggaattctacgctgagtTTGAAACTCACGGTCTGGGGCATTAAACAGCTCCAGGCAAGGGTCCTGGCTGTGGAAAGATACCTAAGGGATCAACAGCTTCTAGGAATTTGGtgatagcaagcttgcc	1	1	33	3	95	78
1396	BG505_gp41_70_F	aggaattctacgctgagtTTGAAACTCACGGTCTGGGGCATTAAACAGCTCCAGGCAAGGGTCTTCGCTGTGGAAAGATACCTAAGGGATCAACAGCTTCTAGGAATTTGGtgatagcaagcttgcc	4	1	4	11	117	82
1397	BG505_gp41_70_Q	aggaattctacgctgagtTTGAAACTCACGGTCTGGGGCATTAAACAGCTCCAGGCAAGGGTCCAGGCTGTGGAAAGATACCTAAGGGATCAACAGCTTCTAGGAATTTGGtgatagcaagcttgcc	0	1	23	8	51	60
1398	BG505_gp41_70_H	aggaattctacgctgagtTTGAAACTCACGGTCTGGGGCATTAAACAGCTCCAGGCAAGGGTCCACGCTGTGGAAAGATACCTAAGGGATCAACAGCTTCTAGGAATTTGGtgatagcaagcttgcc	0	0	2	1	50	23
1399	BG505_gp41_70_P	aggaattctacgctgagtTTGAAACTCACGGTCTGGGGCATTAAACAGCTCCAGGCAAGGGTCCCGGCTGTGGAAAGATACCTAAGGGATCAACAGCTTCTAGGAATTTGGtgatagcaagcttgcc	1	0	1	9	31	32
1400	BG505_gp41_71_G	aggaattctacgctgagtAAACTCACGGTCTGGGGCATTAAACAGCTCCAGGCAAGGGTCCTGGGTGTGGAAAGATACCTAAGGGATCAACAGCTTCTAGGAATTTGGGGCtgatagcaagcttgcc	1	5	15	10	143	134
1401	BG505_gp41_71_E	aggaattctacgctgagtAAACTCACGGTCTGGGGCATTAAACAGCTCCAGGCAAGGGTCCTGGAAGTGGAAAGATACCTAAGGGATCAACAGCTTCTAGGAATTTGGGGCtgatagcaagcttgcc	2	1	15	7	127	108
1402	BG505_gp41_71_D	aggaattctacgctgagtAAACTCACGGTCTGGGGCATTAAACAGCTCCAGGCAAGGGTCCTGGACGTGGAAAGATACCTAAGGGATCAACAGCTTCTAGGAATTTGGGGCtgatagcaagcttgcc	0	0	0	0	1	0
1403	BG505_gp41_71_V	aggaattctacgctgagtAAACTCACGGTCTGGGGCATTAAACAGCTCCAGGCAAGGGTCCTGGTTGTGGAAAGATACCTAAGGGATCAACAGCTTCTAGGAATTTGGGGCtgatagcaagcttgcc	0	0	0	0	4	4
1404	BG505_gp41_71_A	aggaattctacgctgagtAAACTCACGGTCTGGGGCATTAAACAGCTCCAGGCAAGGGTCCTGGCTGTGGAAAGATACCTAAGGGATCAACAGCTTCTAGGAATTTGGGGCtgatagcaagcttgcc	1	0	1	6	102	78
1405	BG505_gp41_71_R	aggaattctacgctgagtAAACTCACGGTCTGGGGCATTAAACAGCTCCAGGCAAGGGTCCTGCGTGTGGAAAGATACCTAAGGGATCAACAGCTTCTAGGAATTTGGGGCtgatagcaagcttgcc	0	2	6	30	22	19
1406	BG505_gp41_71_S	aggaattctacgctgagtAAACTCACGGTCTGGGGCATTAAACAGCTCCAGGCAAGGGTCCTGTCTGTGGAAAGATACCTAAGGGATCAACAGCTTCTAGGAATTTGGGGCtgatagcaagcttgcc	1	0	7	4	53	28
1407	BG505_gp41_71_K	aggaattctacgctgagtAAACTCACGGTCTGGGGCATTAAACAGCTCCAGGCAAGGGTCCTGAAAGTGGAAAGATACCTAAGGGATCAACAGCTTCTAGGAATTTGGGGCtgatagcaagcttgcc	0	1	0	0	17	18
1408	BG505_gp41_71_N	aggaattctacgctgagtAAACTCACGGTCTGGGGCATTAAACAGCTCCAGGCAAGGGTCCTGAACGTGGAAAGATACCTAAGGGATCAACAGCTTCTAGGAATTTGGGGCtgatagcaagcttgcc	1	2	5	7	123	78
1409	BG505_gp41_71_M	aggaattctacgctgagtAAACTCACGGTCTGGGGCATTAAACAGCTCCAGGCAAGGGTCCTGATGGTGGAAAGATACCTAAGGGATCAACAGCTTCTAGGAATTTGGGGCtgatagcaagcttgcc	1	3	4	5	101	65
1410	BG505_gp41_71_I	aggaattctacgctgagtAAACTCACGGTCTGGGGCATTAAACAGCTCCAGGCAAGGGTCCTGATCGTGGAAAGATACCTAAGGGATCAACAGCTTCTAGGAATTTGGGGCtgatagcaagcttgcc	0	0	0	34	14	11
1411	BG505_gp41_71_T	aggaattctacgctgagtAAACTCACGGTCTGGGGCATTAAACAGCTCCAGGCAAGGGTCCTGACCGTGGAAAGATACCTAAGGGATCAACAGCTTCTAGGAATTTGGGGCtgatagcaagcttgcc	1	1	9	0	52	26
1412	BG505_gp41_71_W	aggaattctacgctgagtAAACTCACGGTCTGGGGCATTAAACAGCTCCAGGCAAGGGTCCTGTGGGTGGAAAGATACCTAAGGGATCAACAGCTTCTAGGAATTTGGGGCtgatagcaagcttgcc	1	0	18	14	67	61
1413	BG505_gp41_71_C	aggaattctacgctgagtAAACTCACGGTCTGGGGCATTAAACAGCTCCAGGCAAGGGTCCTGTGCGTGGAAAGATACCTAAGGGATCAACAGCTTCTAGGAATTTGGGGCtgatagcaagcttgcc	0	0	19	4	76	57
1414	BG505_gp41_71_Y	aggaattctacgctgagtAAACTCACGGTCTGGGGCATTAAACAGCTCCAGGCAAGGGTCCTGTACGTGGAAAGATACCTAAGGGATCAACAGCTTCTAGGAATTTGGGGCtgatagcaagcttgcc	0	0	17	0	26	14
1415	BG505_gp41_71_L	aggaattctacgctgagtAAACTCACGGTCTGGGGCATTAAACAGCTCCAGGCAAGGGTCCTGCTGGTGGAAAGATACCTAAGGGATCAACAGCTTCTAGGAATTTGGGGCtgatagcaagcttgcc	1	0	0	0	12	15
1416	BG505_gp41_71_F	aggaattctacgctgagtAAACTCACGGTCTGGGGCATTAAACAGCTCCAGGCAAGGGTCCTGTTCGTGGAAAGATACCTAAGGGATCAACAGCTTCTAGGAATTTGGGGCtgatagcaagcttgcc	0	1	4	0	17	7
1417	BG505_gp41_71_Q	aggaattctacgctgagtAAACTCACGGTCTGGGGCATTAAACAGCTCCAGGCAAGGGTCCTGCAGGTGGAAAGATACCTAAGGGATCAACAGCTTCTAGGAATTTGGGGCtgatagcaagcttgcc	0	1	2	0	29	14
1418	BG505_gp41_71_H	aggaattctacgctgagtAAACTCACGGTCTGGGGCATTAAACAGCTCCAGGCAAGGGTCCTGCACGTGGAAAGATACCTAAGGGATCAACAGCTTCTAGGAATTTGGGGCtgatagcaagcttgcc	0	1	6	10	37	36
1419	BG505_gp41_71_P	aggaattctacgctgagtAAACTCACGGTCTGGGGCATTAAACAGCTCCAGGCAAGGGTCCTGCCGGTGGAAAGATACCTAAGGGATCAACAGCTTCTAGGAATTTGGGGCtgatagcaagcttgcc	5	2	8	0	137	103
1420	BG505_gp41_72_G	aggaattctacgctgagtCTCACGGTCTGGGGCATTAAACAGCTCCAGGCAAGGGTCCTGGCTGGTGAAAGATACCTAAGGGATCAACAGCTTCTAGGAATTTGGGGCTGCtgatagcaagcttgcc	1	2	0	9	61	39
1421	BG505_gp41_72_E	aggaattctacgctgagtCTCACGGTCTGGGGCATTAAACAGCTCCAGGCAAGGGTCCTGGCTGAAGAAAGATACCTAAGGGATCAACAGCTTCTAGGAATTTGGGGCTGCtgatagcaagcttgcc	4	4	2	17	129	118
1422	BG505_gp41_72_D	aggaattctacgctgagtCTCACGGTCTGGGGCATTAAACAGCTCCAGGCAAGGGTCCTGGCTGACGAAAGATACCTAAGGGATCAACAGCTTCTAGGAATTTGGGGCTGCtgatagcaagcttgcc	9	3	30	3	371	313
1423	BG505_gp41_72_V	aggaattctacgctgagtCTCACGGTCTGGGGCATTAAACAGCTCCAGGCAAGGGTCCTGGCTGTTGAAAGATACCTAAGGGATCAACAGCTTCTAGGAATTTGGGGCTGCtgatagcaagcttgcc	3	1	5	0	84	57
1424	BG505_gp41_72_A	aggaattctacgctgagtCTCACGGTCTGGGGCATTAAACAGCTCCAGGCAAGGGTCCTGGCTGCTGAAAGATACCTAAGGGATCAACAGCTTCTAGGAATTTGGGGCTGCtgatagcaagcttgcc	1	3	0	0	24	21
1425	BG505_gp41_72_R	aggaattctacgctgagtCTCACGGTCTGGGGCATTAAACAGCTCCAGGCAAGGGTCCTGGCTCGTGAAAGATACCTAAGGGATCAACAGCTTCTAGGAATTTGGGGCTGCtgatagcaagcttgcc	1	0	7	0	39	28
1426	BG505_gp41_72_S	aggaattctacgctgagtCTCACGGTCTGGGGCATTAAACAGCTCCAGGCAAGGGTCCTGGCTTCTGAAAGATACCTAAGGGATCAACAGCTTCTAGGAATTTGGGGCTGCtgatagcaagcttgcc	1	2	0	4	71	56
1427	BG505_gp41_72_K	aggaattctacgctgagtCTCACGGTCTGGGGCATTAAACAGCTCCAGGCAAGGGTCCTGGCTAAAGAAAGATACCTAAGGGATCAACAGCTTCTAGGAATTTGGGGCTGCtgatagcaagcttgcc	1	1	0	21	35	47
1428	BG505_gp41_72_N	aggaattctacgctgagtCTCACGGTCTGGGGCATTAAACAGCTCCAGGCAAGGGTCCTGGCTAACGAAAGATACCTAAGGGATCAACAGCTTCTAGGAATTTGGGGCTGCtgatagcaagcttgcc	2	1	0	7	40	39
1429	BG505_gp41_72_M	aggaattctacgctgagtCTCACGGTCTGGGGCATTAAACAGCTCCAGGCAAGGGTCCTGGCTATGGAAAGATACCTAAGGGATCAACAGCTTCTAGGAATTTGGGGCTGCtgatagcaagcttgcc	0	0	0	0	17	15
1430	BG505_gp41_72_I	aggaattctacgctgagtCTCACGGTCTGGGGCATTAAACAGCTCCAGGCAAGGGTCCTGGCTATCGAAAGATACCTAAGGGATCAACAGCTTCTAGGAATTTGGGGCTGCtgatagcaagcttgcc	1	1	4	0	26	29
1431	BG505_gp41_72_T	aggaattctacgctgagtCTCACGGTCTGGGGCATTAAACAGCTCCAGGCAAGGGTCCTGGCTACCGAAAGATACCTAAGGGATCAACAGCTTCTAGGAATTTGGGGCTGCtgatagcaagcttgcc	0	2	4	0	59	48
1432	BG505_gp41_72_W	aggaattctacgctgagtCTCACGGTCTGGGGCATTAAACAGCTCCAGGCAAGGGTCCTGGCTTGGGAAAGATACCTAAGGGATCAACAGCTTCTAGGAATTTGGGGCTGCtgatagcaagcttgcc	3	2	9	2	146	120
1433	BG505_gp41_72_C	aggaattctacgctgagtCTCACGGTCTGGGGCATTAAACAGCTCCAGGCAAGGGTCCTGGCTTGCGAAAGATACCTAAGGGATCAACAGCTTCTAGGAATTTGGGGCTGCtgatagcaagcttgcc	1	6	1	11	58	59
1434	BG505_gp41_72_Y	aggaattctacgctgagtCTCACGGTCTGGGGCATTAAACAGCTCCAGGCAAGGGTCCTGGCTTACGAAAGATACCTAAGGGATCAACAGCTTCTAGGAATTTGGGGCTGCtgatagcaagcttgcc	0	1	6	0	43	23
1435	BG505_gp41_72_L	aggaattctacgctgagtCTCACGGTCTGGGGCATTAAACAGCTCCAGGCAAGGGTCCTGGCTCTGGAAAGATACCTAAGGGATCAACAGCTTCTAGGAATTTGGGGCTGCtgatagcaagcttgcc	0	0	0	0	15	9
1436	BG505_gp41_72_F	aggaattctacgctgagtCTCACGGTCTGGGGCATTAAACAGCTCCAGGCAAGGGTCCTGGCTTTCGAAAGATACCTAAGGGATCAACAGCTTCTAGGAATTTGGGGCTGCtgatagcaagcttgcc	1	1	4	0	54	53
1437	BG505_gp41_72_Q	aggaattctacgctgagtCTCACGGTCTGGGGCATTAAACAGCTCCAGGCAAGGGTCCTGGCTCAGGAAAGATACCTAAGGGATCAACAGCTTCTAGGAATTTGGGGCTGCtgatagcaagcttgcc	1	0	5	21	60	56
1438	BG505_gp41_72_H	aggaattctacgctgagtCTCACGGTCTGGGGCATTAAACAGCTCCAGGCAAGGGTCCTGGCTCACGAAAGATACCTAAGGGATCAACAGCTTCTAGGAATTTGGGGCTGCtgatagcaagcttgcc	4	0	4	0	65	49
1439	BG505_gp41_72_P	aggaattctacgctgagtCTCACGGTCTGGGGCATTAAACAGCTCCAGGCAAGGGTCCTGGCTCCGGAAAGATACCTAAGGGATCAACAGCTTCTAGGAATTTGGGGCTGCtgatagcaagcttgcc	2	2	0	11	143	113
1440	BG505_gp41_73_G	aggaattctacgctgagtACGGTCTGGGGCATTAAACAGCTCCAGGCAAGGGTCCTGGCTGTGGGTAGATACCTAAGGGATCAACAGCTTCTAGGAATTTGGGGCTGCTCTtgatagcaagcttgcc	0	2	12	0	104	61
1441	BG505_gp41_73_E	aggaattctacgctgagtACGGTCTGGGGCATTAAACAGCTCCAGGCAAGGGTCCTGGCTGTGGAAAGATACCTAAGGGATCAACAGCTTCTAGGAATTTGGGGCTGCTCTtgatagcaagcttgcc	2	0	0	23	179	112
1442	BG505_gp41_73_D	aggaattctacgctgagtACGGTCTGGGGCATTAAACAGCTCCAGGCAAGGGTCCTGGCTGTGGACAGATACCTAAGGGATCAACAGCTTCTAGGAATTTGGGGCTGCTCTtgatagcaagcttgcc	16	7	68	137	651	405
1443	BG505_gp41_73_V	aggaattctacgctgagtACGGTCTGGGGCATTAAACAGCTCCAGGCAAGGGTCCTGGCTGTGGTTAGATACCTAAGGGATCAACAGCTTCTAGGAATTTGGGGCTGCTCTtgatagcaagcttgcc	1	11	9	8	108	81
1444	BG505_gp41_73_A	aggaattctacgctgagtACGGTCTGGGGCATTAAACAGCTCCAGGCAAGGGTCCTGGCTGTGGCTAGATACCTAAGGGATCAACAGCTTCTAGGAATTTGGGGCTGCTCTtgatagcaagcttgcc	3	1	19	0	170	95
1445	BG505_gp41_73_R	aggaattctacgctgagtACGGTCTGGGGCATTAAACAGCTCCAGGCAAGGGTCCTGGCTGTGCGTAGATACCTAAGGGATCAACAGCTTCTAGGAATTTGGGGCTGCTCTtgatagcaagcttgcc	1	0	2	0	116	73
1446	BG505_gp41_73_S	aggaattctacgctgagtACGGTCTGGGGCATTAAACAGCTCCAGGCAAGGGTCCTGGCTGTGTCTAGATACCTAAGGGATCAACAGCTTCTAGGAATTTGGGGCTGCTCTtgatagcaagcttgcc	2	3	1	7	299	190
1447	BG505_gp41_73_K	aggaattctacgctgagtACGGTCTGGGGCATTAAACAGCTCCAGGCAAGGGTCCTGGCTGTGAAAAGATACCTAAGGGATCAACAGCTTCTAGGAATTTGGGGCTGCTCTtgatagcaagcttgcc	2	2	17	16	214	148
1448	BG505_gp41_73_N	aggaattctacgctgagtACGGTCTGGGGCATTAAACAGCTCCAGGCAAGGGTCCTGGCTGTGAACAGATACCTAAGGGATCAACAGCTTCTAGGAATTTGGGGCTGCTCTtgatagcaagcttgcc	0	3	18	0	163	109
1449	BG505_gp41_73_M	aggaattctacgctgagtACGGTCTGGGGCATTAAACAGCTCCAGGCAAGGGTCCTGGCTGTGATGAGATACCTAAGGGATCAACAGCTTCTAGGAATTTGGGGCTGCTCTtgatagcaagcttgcc	6	4	54	12	364	219
1450	BG505_gp41_73_I	aggaattctacgctgagtACGGTCTGGGGCATTAAACAGCTCCAGGCAAGGGTCCTGGCTGTGATCAGATACCTAAGGGATCAACAGCTTCTAGGAATTTGGGGCTGCTCTtgatagcaagcttgcc	1	0	14	29	190	146
1451	BG505_gp41_73_T	aggaattctacgctgagtACGGTCTGGGGCATTAAACAGCTCCAGGCAAGGGTCCTGGCTGTGACCAGATACCTAAGGGATCAACAGCTTCTAGGAATTTGGGGCTGCTCTtgatagcaagcttgcc	7	6	30	46	426	259
1452	BG505_gp41_73_W	aggaattctacgctgagtACGGTCTGGGGCATTAAACAGCTCCAGGCAAGGGTCCTGGCTGTGTGGAGATACCTAAGGGATCAACAGCTTCTAGGAATTTGGGGCTGCTCTtgatagcaagcttgcc	2	0	0	0	83	60
1453	BG505_gp41_73_C	aggaattctacgctgagtACGGTCTGGGGCATTAAACAGCTCCAGGCAAGGGTCCTGGCTGTGTGCAGATACCTAAGGGATCAACAGCTTCTAGGAATTTGGGGCTGCTCTtgatagcaagcttgcc	2	0	0	0	99	74
1454	BG505_gp41_73_Y	aggaattctacgctgagtACGGTCTGGGGCATTAAACAGCTCCAGGCAAGGGTCCTGGCTGTGTACAGATACCTAAGGGATCAACAGCTTCTAGGAATTTGGGGCTGCTCTtgatagcaagcttgcc	0	0	0	0	60	27
1455	BG505_gp41_73_L	aggaattctacgctgagtACGGTCTGGGGCATTAAACAGCTCCAGGCAAGGGTCCTGGCTGTGCTGAGATACCTAAGGGATCAACAGCTTCTAGGAATTTGGGGCTGCTCTtgatagcaagcttgcc	6	1	0	9	146	105
1456	BG505_gp41_73_F	aggaattctacgctgagtACGGTCTGGGGCATTAAACAGCTCCAGGCAAGGGTCCTGGCTGTGTTCAGATACCTAAGGGATCAACAGCTTCTAGGAATTTGGGGCTGCTCTtgatagcaagcttgcc	0	2	26	19	143	104
1457	BG505_gp41_73_Q	aggaattctacgctgagtACGGTCTGGGGCATTAAACAGCTCCAGGCAAGGGTCCTGGCTGTGCAGAGATACCTAAGGGATCAACAGCTTCTAGGAATTTGGGGCTGCTCTtgatagcaagcttgcc	0	0	19	1	99	64
1458	BG505_gp41_73_H	aggaattctacgctgagtACGGTCTGGGGCATTAAACAGCTCCAGGCAAGGGTCCTGGCTGTGCACAGATACCTAAGGGATCAACAGCTTCTAGGAATTTGGGGCTGCTCTtgatagcaagcttgcc	2	5	5	17	180	113
1459	BG505_gp41_73_P	aggaattctacgctgagtACGGTCTGGGGCATTAAACAGCTCCAGGCAAGGGTCCTGGCTGTGCCGAGATACCTAAGGGATCAACAGCTTCTAGGAATTTGGGGCTGCTCTtgatagcaagcttgcc	2	1	5	9	158	91
1460	BG505_gp41_74_G	aggaattctacgctgagtGTCTGGGGCATTAAACAGCTCCAGGCAAGGGTCCTGGCTGTGGAAGGTTACCTAAGGGATCAACAGCTTCTAGGAATTTGGGGCTGCTCTGGAtgatagcaagcttgcc	4	2	1	0	88	60
1461	BG505_gp41_74_E	aggaattctacgctgagtGTCTGGGGCATTAAACAGCTCCAGGCAAGGGTCCTGGCTGTGGAAGAATACCTAAGGGATCAACAGCTTCTAGGAATTTGGGGCTGCTCTGGAtgatagcaagcttgcc	3	5	1	3	69	58
1462	BG505_gp41_74_D	aggaattctacgctgagtGTCTGGGGCATTAAACAGCTCCAGGCAAGGGTCCTGGCTGTGGAAGACTACCTAAGGGATCAACAGCTTCTAGGAATTTGGGGCTGCTCTGGAtgatagcaagcttgcc	3	1	40	13	155	110
1463	BG505_gp41_74_V	aggaattctacgctgagtGTCTGGGGCATTAAACAGCTCCAGGCAAGGGTCCTGGCTGTGGAAGTTTACCTAAGGGATCAACAGCTTCTAGGAATTTGGGGCTGCTCTGGAtgatagcaagcttgcc	0	1	0	13	55	36
1464	BG505_gp41_74_A	aggaattctacgctgagtGTCTGGGGCATTAAACAGCTCCAGGCAAGGGTCCTGGCTGTGGAGGCTTACCTAAGGGATCAACAGCTTCTAGGAATTTGGGGCTGCTCTGGAtgatagcaagcttgcc	1	4	9	4	316	249
1465	BG505_gp41_74_R	aggaattctacgctgagtGTCTGGGGCATTAAACAGCTCCAGGCAAGGGTCCTGGCTGTGGAACGTTACCTAAGGGATCAACAGCTTCTAGGAATTTGGGGCTGCTCTGGAtgatagcaagcttgcc	1	1	0	0	59	38
1466	BG505_gp41_74_S	aggaattctacgctgagtGTCTGGGGCATTAAACAGCTCCAGGCAAGGGTCCTGGCTGTGGAATCTTACCTAAGGGATCAACAGCTTCTAGGAATTTGGGGCTGCTCTGGAtgatagcaagcttgcc	3	1	0	6	95	80
1467	BG505_gp41_74_K	aggaattctacgctgagtGTCTGGGGCATTAAACAGCTCCAGGCAAGGGTCCTGGCTGTGGAAAAATACCTAAGGGATCAACAGCTTCTAGGAATTTGGGGCTGCTCTGGAtgatagcaagcttgcc	0	2	2	0	38	38
1468	BG505_gp41_74_N	aggaattctacgctgagtGTCTGGGGCATTAAACAGCTCCAGGCAAGGGTCCTGGCTGTGGAAAACTACCTAAGGGATCAACAGCTTCTAGGAATTTGGGGCTGCTCTGGAtgatagcaagcttgcc	2	2	3	30	109	91
1469	BG505_gp41_74_M	aggaattctacgctgagtGTCTGGGGCATTAAACAGCTCCAGGCAAGGGTCCTGGCTGTGGAAATGTACCTAAGGGATCAACAGCTTCTAGGAATTTGGGGCTGCTCTGGAtgatagcaagcttgcc	2	0	1	30	92	89
1470	BG505_gp41_74_I	aggaattctacgctgagtGTCTGGGGCATTAAACAGCTCCAGGCAAGGGTCCTGGCTGTGGAAATCTACCTAAGGGATCAACAGCTTCTAGGAATTTGGGGCTGCTCTGGAtgatagcaagcttgcc	0	0	1	9	89	54
1471	BG505_gp41_74_T	aggaattctacgctgagtGTCTGGGGCATTAAACAGCTCCAGGCAAGGGTCCTGGCTGTGGAAACCTACCTAAGGGATCAACAGCTTCTAGGAATTTGGGGCTGCTCTGGAtgatagcaagcttgcc	2	1	13	35	174	126
1472	BG505_gp41_74_W	aggaattctacgctgagtGTCTGGGGCATTAAACAGCTCCAGGCAAGGGTCCTGGCTGTGGAATGGTACCTAAGGGATCAACAGCTTCTAGGAATTTGGGGCTGCTCTGGAtgatagcaagcttgcc	3	1	18	4	132	99
1473	BG505_gp41_74_C	aggaattctacgctgagtGTCTGGGGCATTAAACAGCTCCAGGCAAGGGTCCTGGCTGTGGAATGCTACCTAAGGGATCAACAGCTTCTAGGAATTTGGGGCTGCTCTGGAtgatagcaagcttgcc	4	2	1	3	178	117
1474	BG505_gp41_74_Y	aggaattctacgctgagtGTCTGGGGCATTAAACAGCTCCAGGCAAGGGTCCTGGCTGTGGAATACTACCTAAGGGATCAACAGCTTCTAGGAATTTGGGGCTGCTCTGGAtgatagcaagcttgcc	5	3	43	0	148	109
1475	BG505_gp41_74_L	aggaattctacgctgagtGTCTGGGGCATTAAACAGCTCCAGGCAAGGGTCCTGGCTGTGGAACTGTACCTAAGGGATCAACAGCTTCTAGGAATTTGGGGCTGCTCTGGAtgatagcaagcttgcc	3	0	2	0	76	60
1476	BG505_gp41_74_F	aggaattctacgctgagtGTCTGGGGCATTAAACAGCTCCAGGCAAGGGTCCTGGCTGTGGAGTTCTACCTAAGGGATCAACAGCTTCTAGGAATTTGGGGCTGCTCTGGAtgatagcaagcttgcc	0	0	0	0	39	23
1477	BG505_gp41_74_Q	aggaattctacgctgagtGTCTGGGGCATTAAACAGCTCCAGGCAAGGGTCCTGGCTGTGGAACAGTACCTAAGGGATCAACAGCTTCTAGGAATTTGGGGCTGCTCTGGAtgatagcaagcttgcc	4	9	23	5	293	216
1478	BG505_gp41_74_H	aggaattctacgctgagtGTCTGGGGCATTAAACAGCTCCAGGCAAGGGTCCTGGCTGTGGAACACTACCTAAGGGATCAACAGCTTCTAGGAATTTGGGGCTGCTCTGGAtgatagcaagcttgcc	2	1	7	5	145	118
1479	BG505_gp41_74_P	aggaattctacgctgagtGTCTGGGGCATTAAACAGCTCCAGGCAAGGGTCCTGGCTGTGGAACCGTACCTAAGGGATCAACAGCTTCTAGGAATTTGGGGCTGCTCTGGAtgatagcaagcttgcc	15	11	34	151	809	667
1480	BG505_gp41_75_G	aggaattctacgctgagtTGGGGCATTAAACAGCTCCAGGCAAGGGTCCTGGCTGTGGAAAGAGGTCTAAGGGATCAACAGCTTCTAGGAATTTGGGGCTGCTCTGGAAAAtgatagcaagcttgcc	0	1	14	8	129	88
1481	BG505_gp41_75_E	aggaattctacgctgagtTGGGGCATTAAACAGCTCCAGGCAAGGGTCCTGGCTGTGGAAAGAGAACTAAGGGATCAACAGCTTCTAGGAATTTGGGGCTGCTCTGGAAAAtgatagcaagcttgcc	1	4	17	21	246	147
1482	BG505_gp41_75_D	aggaattctacgctgagtTGGGGCATTAAACAGCTCCAGGCAAGGGTCCTGGCTGTGGAAAGAGACCTAAGGGATCAACAGCTTCTAGGAATTTGGGGCTGCTCTGGAAAAtgatagcaagcttgcc	4	0	0	5	124	91
1483	BG505_gp41_75_V	aggaattctacgctgagtTGGGGCATTAAACAGCTCCAGGCAAGGGTCCTGGCTGTGGAAAGAGTTCTAAGGGATCAACAGCTTCTAGGAATTTGGGGCTGCTCTGGAAAAtgatagcaagcttgcc	3	3	14	0	109	88
1484	BG505_gp41_75_A	aggaattctacgctgagtTGGGGCATTAAACAGCTCCAGGCAAGGGTCCTGGCTGTGGAAAGAGCTCTAAGGGATCAACAGCTTCTAGGAATTTGGGGCTGCTCTGGAAAAtgatagcaagcttgcc	0	0	0	0	30	13
1485	BG505_gp41_75_R	aggaattctacgctgagtTGGGGCATTAAACAGCTCCAGGCAAGGGTCCTGGCTGTGGAAAGACGTCTAAGGGATCAACAGCTTCTAGGAATTTGGGGCTGCTCTGGAAAAtgatagcaagcttgcc	3	8	20	1	233	171
1486	BG505_gp41_75_S	aggaattctacgctgagtTGGGGCATTAAACAGCTCCAGGCAAGGGTCCTGGCTGTGGAAAGATCTCTAAGGGATCAACAGCTTCTAGGAATTTGGGGCTGCTCTGGAAAAtgatagcaagcttgcc	3	2	0	5	112	102
1487	BG505_gp41_75_K	aggaattctacgctgagtTGGGGCATTAAACAGCTCCAGGCAAGGGTCCTGGCTGTGGAAAGAAAACTAAGGGATCAACAGCTTCTAGGAATTTGGGGCTGCTCTGGAAAAtgatagcaagcttgcc	0	1	0	0	54	37
1488	BG505_gp41_75_N	aggaattctacgctgagtTGGGGCATTAAACAGCTCCAGGCAAGGGTCCTGGCTGTGGAAAGAAACCTAAGGGATCAACAGCTTCTAGGAATTTGGGGCTGCTCTGGAAAAtgatagcaagcttgcc	0	0	0	19	65	52
1489	BG505_gp41_75_M	aggaattctacgctgagtTGGGGCATTAAACAGCTCCAGGCAAGGGTCCTGGCTGTGGAAAGAATGCTAAGGGATCAACAGCTTCTAGGAATTTGGGGCTGCTCTGGAAAAtgatagcaagcttgcc	1	1	0	0	20	13
1490	BG505_gp41_75_I	aggaattctacgctgagtTGGGGCATTAAACAGCTCCAGGCAAGGGTCCTGGCTGTGGAAAGAATCCTAAGGGATCAACAGCTTCTAGGAATTTGGGGCTGCTCTGGAAAAtgatagcaagcttgcc	0	0	0	0	5	4
1491	BG505_gp41_75_T	aggaattctacgctgagtTGGGGCATTAAACAGCTCCAGGCAAGGGTCCTGGCTGTGGAAAGAACCCTAAGGGATCAACAGCTTCTAGGAATTTGGGGCTGCTCTGGAAAAtgatagcaagcttgcc	4	4	59	0	185	153
1492	BG505_gp41_75_W	aggaattctacgctgagtTGGGGCATTAAACAGCTCCAGGCAAGGGTCCTGGCTGTGGAAAGATGGCTAAGGGATCAACAGCTTCTAGGAATTTGGGGCTGCTCTGGAAAAtgatagcaagcttgcc	1	0	0	16	115	79
1493	BG505_gp41_75_C	aggaattctacgctgagtTGGGGCATTAAACAGCTCCAGGCAAGGGTCCTGGCTGTGGAAAGATGCCTAAGGGATCAACAGCTTCTAGGAATTTGGGGCTGCTCTGGAAAAtgatagcaagcttgcc	1	2	1	0	51	27
1494	BG505_gp41_75_Y	aggaattctacgctgagtTGGGGCATTAAACAGCTCCAGGCAAGGGTCCTGGCTGTGGAAAGATACCTAAGGGATCAACAGCTTCTAGGAATTTGGGGCTGCTCTGGAAAAtgatagcaagcttgcc	0	0	9	6	47	24
1495	BG505_gp41_75_L	aggaattctacgctgagtTGGGGCATTAAACAGCTCCAGGCAAGGGTCCTGGCTGTGGAAAGACTGCTAAGGGATCAACAGCTTCTAGGAATTTGGGGCTGCTCTGGAAAAtgatagcaagcttgcc	3	3	6	0	80	68
1496	BG505_gp41_75_F	aggaattctacgctgagtTGGGGCATTAAACAGCTCCAGGCAAGGGTCCTGGCTGTGGAAAGATTCCTAAGGGATCAACAGCTTCTAGGAATTTGGGGCTGCTCTGGAAAAtgatagcaagcttgcc	1	0	16	0	86	82
1497	BG505_gp41_75_Q	aggaattctacgctgagtTGGGGCATTAAACAGCTCCAGGCAAGGGTCCTGGCTGTGGAAAGACAGCTAAGGGATCAACAGCTTCTAGGAATTTGGGGCTGCTCTGGAAAAtgatagcaagcttgcc	1	4	6	21	185	137
1498	BG505_gp41_75_H	aggaattctacgctgagtTGGGGCATTAAACAGCTCCAGGCAAGGGTCCTGGCTGTGGAAAGACACCTAAGGGATCAACAGCTTCTAGGAATTTGGGGCTGCTCTGGAAAAtgatagcaagcttgcc	0	1	0	0	46	34
1499	BG505_gp41_75_P	aggaattctacgctgagtTGGGGCATTAAACAGCTCCAGGCAAGGGTCCTGGCTGTGGAAAGACCGCTAAGGGATCAACAGCTTCTAGGAATTTGGGGCTGCTCTGGAAAAtgatagcaagcttgcc	3	2	43	10	455	376
1500	BG505_gp41_76_G	aggaattctacgctgagtGGCATTAAACAGCTCCAGGCAAGGGTCCTGGCTGTGGAAAGATACGGTAGGGATCAACAGCTTCTAGGAATTTGGGGCTGCTCTGGAAAACTCtgatagcaagcttgcc	0	0	0	0	0	0
1501	BG505_gp41_76_E	aggaattctacgctgagtGGCATTAAACAGCTCCAGGCAAGGGTCCTGGCTGTGGAAAGATACGAAAGGGATCAACAGCTTCTAGGAATTTGGGGCTGCTCTGGAAAACTCtgatagcaagcttgcc	0	0	0	0	4	0
1502	BG505_gp41_76_D	aggaattctacgctgagtGGCATTAAACAGCTCCAGGCAAGGGTCCTGGCTGTGGAAAGATACGACAGGGATCAACAGCTTCTAGGAATTTGGGGCTGCTCTGGAAAACTCtgatagcaagcttgcc	0	0	0	0	0	0
1503	BG505_gp41_76_V	aggaattctacgctgagtGGCATTAAACAGCTCCAGGCAAGGGTCCTGGCTGTGGAAAGATACGTTAGGGATCAACAGCTTCTAGGAATTTGGGGCTGCTCTGGAAAACTCtgatagcaagcttgcc	0	0	0	0	0	0
1504	BG505_gp41_76_A	aggaattctacgctgagtGGCATTAAACAGCTCCAGGCAAGGGTCCTGGCTGTGGAAAGATACGCTAGGGATCAACAGCTTCTAGGAATTTGGGGCTGCTCTGGAAAACTCtgatagcaagcttgcc	0	0	0	0	0	0
1505	BG505_gp41_76_R	aggaattctacgctgagtGGCATTAAACAGCTCCAGGCAAGGGTCCTGGCTGTGGAAAGATACCGTAGGGATCAACAGCTTCTAGGAATTTGGGGCTGCTCTGGAAAACTCtgatagcaagcttgcc	0	0	0	0	0	0
1506	BG505_gp41_76_S	aggaattctacgctgagtGGCATTAAACAGCTCCAGGCAAGGGTCCTGGCTGTGGAAAGATACTCTAGGGATCAACAGCTTCTAGGAATTTGGGGCTGCTCTGGAAAACTCtgatagcaagcttgcc	0	0	0	0	0	0
1507	BG505_gp41_76_K	aggaattctacgctgagtGGCATTAAACAGCTCCAGGCAAGGGTCCTGGCTGTGGAAAGATACAAAAGGGATCAACAGCTTCTAGGAATTTGGGGCTGCTCTGGAAAACTCtgatagcaagcttgcc	0	0	0	0	0	0
1508	BG505_gp41_76_N	aggaattctacgctgagtGGCATTAAACAGCTCCAGGCAAGGGTCCTGGCTGTGGAAAGATACAACAGGGATCAACAGCTTCTAGGAATTTGGGGCTGCTCTGGAAAACTCtgatagcaagcttgcc	0	0	0	0	0	0
1509	BG505_gp41_76_M	aggaattctacgctgagtGGCATTAAACAGCTCCAGGCAAGGGTCCTGGCTGTGGAAAGATACATGAGGGATCAACAGCTTCTAGGAATTTGGGGCTGCTCTGGAAAACTCtgatagcaagcttgcc	0	0	0	0	0	0
1510	BG505_gp41_76_I	aggaattctacgctgagtGGCATTAAACAGCTCCAGGCAAGGGTCCTGGCTGTGGAAAGATACATCAGGGATCAACAGCTTCTAGGAATTTGGGGCTGCTCTGGAAAACTCtgatagcaagcttgcc	0	0	0	0	0	0
1511	BG505_gp41_76_T	aggaattctacgctgagtGGCATTAAACAGCTCCAGGCAAGGGTCCTGGCTGTGGAAAGATACACCAGGGATCAACAGCTTCTAGGAATTTGGGGCTGCTCTGGAAAACTCtgatagcaagcttgcc	0	0	0	0	0	0
1512	BG505_gp41_76_W	aggaattctacgctgagtGGCATTAAACAGCTCCAGGCAAGGGTCCTGGCTGTGGAAAGATACTGGAGGGATCAACAGCTTCTAGGAATTTGGGGCTGCTCTGGAAAACTCtgatagcaagcttgcc	0	0	0	0	0	0
1513	BG505_gp41_76_C	aggaattctacgctgagtGGCATTAAACAGCTCCAGGCAAGGGTCCTGGCTGTGGAAAGATACTGCAGGGATCAACAGCTTCTAGGAATTTGGGGCTGCTCTGGAAAACTCtgatagcaagcttgcc	0	0	0	0	0	0
1514	BG505_gp41_76_Y	aggaattctacgctgagtGGCATTAAACAGCTCCAGGCAAGGGTCCTGGCTGTGGAAAGATACTACAGGGATCAACAGCTTCTAGGAATTTGGGGCTGCTCTGGAAAACTCtgatagcaagcttgcc	0	0	0	0	0	0
1515	BG505_gp41_76_L	aggaattctacgctgagtGGCATTAAACAGCTCCAGGCAAGGGTCCTGGCTGTGGAAAGATACCTGAGGGATCAACAGCTTCTAGGAATTTGGGGCTGCTCTGGAAAACTCtgatagcaagcttgcc	0	0	0	0	0	0
1516	BG505_gp41_76_F	aggaattctacgctgagtGGCATTAAACAGCTCCAGGCAAGGGTCCTGGCTGTGGAAAGATACTTCAGGGATCAACAGCTTCTAGGAATTTGGGGCTGCTCTGGAAAACTCtgatagcaagcttgcc	0	0	0	0	0	0
1517	BG505_gp41_76_Q	aggaattctacgctgagtGGCATTAAACAGCTCCAGGCAAGGGTCCTGGCTGTGGAAAGATACCAGAGGGATCAACAGCTTCTAGGAATTTGGGGCTGCTCTGGAAAACTCtgatagcaagcttgcc	0	0	0	0	0	0
1518	BG505_gp41_76_H	aggaattctacgctgagtGGCATTAAACAGCTCCAGGCAAGGGTCCTGGCTGTGGAAAGATACCACAGGGATCAACAGCTTCTAGGAATTTGGGGCTGCTCTGGAAAACTCtgatagcaagcttgcc	0	0	0	0	0	0
1519	BG505_gp41_76_P	aggaattctacgctgagtGGCATTAAACAGCTCCAGGCAAGGGTCCTGGCTGTGGAAAGATACCCGAGGGATCAACAGCTTCTAGGAATTTGGGGCTGCTCTGGAAAACTCtgatagcaagcttgcc	0	0	0	0	0	0
1520	BG505_gp41_77_G	aggaattctacgctgagtATTAAACAGCTCCAGGCAAGGGTCCTGGCTGTGGAAAGATACCTAGGTGATCAACAGCTTCTAGGAATTTGGGGCTGCTCTGGAAAACTCATCtgatagcaagcttgcc	0	1	0	0	23	10
1521	BG505_gp41_77_E	aggaattctacgctgagtATTAAACAGCTCCAGGCAAGGGTCCTGGCTGTGGAAAGATACCTAGAAGATCAACAGCTTCTAGGAATTTGGGGCTGCTCTGGAAAACTCATCtgatagcaagcttgcc	0	0	0	0	11	13
1522	BG505_gp41_77_D	aggaattctacgctgagtATTAAACAGCTCCAGGCAAGGGTCCTGGCTGTGGAAAGATACCTAGACGATCAACAGCTTCTAGGAATTTGGGGCTGCTCTGGAAAACTCATCtgatagcaagcttgcc	0	0	1	2	106	66
1523	BG505_gp41_77_V	aggaattctacgctgagtATTAAACAGCTCCAGGCAAGGGTCCTGGCTGTGGAAAGATACCTAGTTGATCAACAGCTTCTAGGAATTTGGGGCTGCTCTGGAAAACTCATCtgatagcaagcttgcc	0	0	0	1	22	17
1524	BG505_gp41_77_A	aggaattctacgctgagtATTAAACAGCTCCAGGCAAGGGTCCTGGCTGTGGAAAGATACCTAGCTGATCAACAGCTTCTAGGAATTTGGGGCTGCTCTGGAAAACTCATCtgatagcaagcttgcc	0	0	6	0	16	5
1525	BG505_gp41_77_R	aggaattctacgctgagtATTAAACAGCTCCAGGCAAGGGTCCTGGCTGTGGAAAGATACCTACGTGATCAACAGCTTCTAGGAATTTGGGGCTGCTCTGGAAAACTCATCtgatagcaagcttgcc	1	0	0	0	8	5
1526	BG505_gp41_77_S	aggaattctacgctgagtATTAAACAGCTCCAGGCAAGGGTCCTGGCTGTGGAAAGATACCTATCTGATCAACAGCTTCTAGGAATTTGGGGCTGCTCTGGAAAACTCATCtgatagcaagcttgcc	0	0	0	0	40	23
1527	BG505_gp41_77_K	aggaattctacgctgagtATTAAACAGCTCCAGGCAAGGGTCCTGGCTGTGGAAAGATACCTAAAAGATCAACAGCTTCTAGGAATTTGGGGCTGCTCTGGAAAACTCATCtgatagcaagcttgcc	0	0	4	0	8	3
1528	BG505_gp41_77_N	aggaattctacgctgagtATTAAACAGCTCCAGGCAAGGGTCCTGGCTGTGGAAAGATACCTAAACGATCAACAGCTTCTAGGAATTTGGGGCTGCTCTGGAAAACTCATCtgatagcaagcttgcc	0	0	1	0	16	22
1529	BG505_gp41_77_M	aggaattctacgctgagtATTAAACAGCTCCAGGCAAGGGTCCTGGCTGTGGAAAGATACCTAATGGATCAACAGCTTCTAGGAATTTGGGGCTGCTCTGGAAAACTCATCtgatagcaagcttgcc	1	1	2	0	67	34
1530	BG505_gp41_77_I	aggaattctacgctgagtATTAAACAGCTCCAGGCAAGGGTCCTGGCTGTGGAAAGATACCTAATCGATCAACAGCTTCTAGGAATTTGGGGCTGCTCTGGAAAACTCATCtgatagcaagcttgcc	0	0	0	0	5	8
1531	BG505_gp41_77_T	aggaattctacgctgagtATTAAACAGCTCCAGGCAAGGGTCCTGGCTGTGGAAAGATACCTAACCGATCAACAGCTTCTAGGAATTTGGGGCTGCTCTGGAAAACTCATCtgatagcaagcttgcc	0	0	0	0	18	29
1532	BG505_gp41_77_W	aggaattctacgctgagtATTAAACAGCTCCAGGCAAGGGTCCTGGCTGTGGAAAGATACCTATGGGATCAACAGCTTCTAGGAATTTGGGGCTGCTCTGGAAAACTCATCtgatagcaagcttgcc	1	0	0	0	28	15
1533	BG505_gp41_77_C	aggaattctacgctgagtATTAAACAGCTCCAGGCAAGGGTCCTGGCTGTGGAAAGATACCTATGCGATCAACAGCTTCTAGGAATTTGGGGCTGCTCTGGAAAACTCATCtgatagcaagcttgcc	0	0	0	0	17	17
1534	BG505_gp41_77_Y	aggaattctacgctgagtATTAAACAGCTCCAGGCAAGGGTCCTGGCTGTGGAAAGATACCTATACGATCAACAGCTTCTAGGAATTTGGGGCTGCTCTGGAAAACTCATCtgatagcaagcttgcc	0	0	2	0	26	12
1535	BG505_gp41_77_L	aggaattctacgctgagtATTAAACAGCTCCAGGCAAGGGTCCTGGCTGTGGAAAGATACCTACTGGATCAACAGCTTCTAGGAATTTGGGGCTGCTCTGGAAAACTCATCtgatagcaagcttgcc	0	1	0	0	9	6
1536	BG505_gp41_77_F	aggaattctacgctgagtATTAAACAGCTCCAGGCAAGGGTCCTGGCTGTGGAAAGATACCTATTCGATCAACAGCTTCTAGGAATTTGGGGCTGCTCTGGAAAACTCATCtgatagcaagcttgcc	1	0	0	0	36	26
1537	BG505_gp41_77_Q	aggaattctacgctgagtATTAAACAGCTCCAGGCAAGGGTCCTGGCTGTGGAAAGATACCTACAGGATCAACAGCTTCTAGGAATTTGGGGCTGCTCTGGAAAACTCATCtgatagcaagcttgcc	0	0	4	0	28	27
1538	BG505_gp41_77_H	aggaattctacgctgagtATTAAACAGCTCCAGGCAAGGGTCCTGGCTGTGGAAAGATACCTACACGATCAACAGCTTCTAGGAATTTGGGGCTGCTCTGGAAAACTCATCtgatagcaagcttgcc	0	0	0	0	9	18
1539	BG505_gp41_77_P	aggaattctacgctgagtATTAAACAGCTCCAGGCAAGGGTCCTGGCTGTGGAAAGATACCTACCGGATCAACAGCTTCTAGGAATTTGGGGCTGCTCTGGAAAACTCATCtgatagcaagcttgcc	1	0	7	21	55	41
1540	BG505_gp41_78_G	aggaattctacgctgagtAAACAGCTCCAGGCAAGGGTCCTGGCTGTGGAAAGATACCTAAGGGGTCAACAGCTTCTAGGAATTTGGGGCTGCTCTGGAAAACTCATCTGCtgatagcaagcttgcc	3	1	18	31	189	176
1541	BG505_gp41_78_E	aggaattctacgctgagtAAACAGCTCCAGGCAAGGGTCCTGGCTGTGGAAAGATACCTAAGGGAACAACAGCTTCTAGGAATTTGGGGCTGCTCTGGAAAACTCATCTGCtgatagcaagcttgcc	6	9	82	56	583	409
1542	BG505_gp41_78_D	aggaattctacgctgagtAAACAGCTCCAGGCAAGGGTCCTGGCTGTGGAAAGATACCTAAGGGACCAACAGCTTCTAGGAATTTGGGGCTGCTCTGGAAAACTCATCTGCtgatagcaagcttgcc	1	4	28	32	148	104
1543	BG505_gp41_78_V	aggaattctacgctgagtAAACAGCTCCAGGCAAGGGTCCTGGCTGTGGAAAGATACCTAAGGGTTCAACAGCTTCTAGGAATTTGGGGCTGCTCTGGAAAACTCATCTGCtgatagcaagcttgcc	3	5	30	6	245	164
1544	BG505_gp41_78_A	aggaattctacgctgagtAAACAGCTCCAGGCAAGGGTCCTGGCTGTGGAAAGATACCTAAGGGCTCAACAGCTTCTAGGAATTTGGGGCTGCTCTGGAAAACTCATCTGCtgatagcaagcttgcc	4	4	19	7	185	111
1545	BG505_gp41_78_R	aggaattctacgctgagtAAACAGCTCCAGGCAAGGGTCCTGGCTGTGGAAAGATACCTAAGGCGTCAACAGCTTCTAGGAATTTGGGGCTGCTCTGGAAAACTCATCTGCtgatagcaagcttgcc	3	2	23	19	180	126
1546	BG505_gp41_78_S	aggaattctacgctgagtAAACAGCTCCAGGCAAGGGTCCTGGCTGTGGAAAGATACCTAAGGTCTCAACAGCTTCTAGGAATTTGGGGCTGCTCTGGAAAACTCATCTGCtgatagcaagcttgcc	13	16	62	80	563	356
1547	BG505_gp41_78_K	aggaattctacgctgagtAAACAGCTCCAGGCAAGGGTCCTGGCTGTGGAAAGATACCTAAGGAAACAACAGCTTCTAGGAATTTGGGGCTGCTCTGGAAAACTCATCTGCtgatagcaagcttgcc	4	4	0	3	114	80
1548	BG505_gp41_78_N	aggaattctacgctgagtAAACAGCTCCAGGCAAGGGTCCTGGCTGTGGAAAGATACCTAAGGAACCAACAGCTTCTAGGAATTTGGGGCTGCTCTGGAAAACTCATCTGCtgatagcaagcttgcc	3	4	58	37	425	353
1549	BG505_gp41_78_M	aggaattctacgctgagtAAACAGCTCCAGGCAAGGGTCCTGGCTGTGGAAAGATACCTAAGGATGCAACAGCTTCTAGGAATTTGGGGCTGCTCTGGAAAACTCATCTGCtgatagcaagcttgcc	2	3	109	59	366	213
1550	BG505_gp41_78_I	aggaattctacgctgagtAAACAGCTCCAGGCAAGGGTCCTGGCTGTGGAAAGATACCTAAGGATCCAACAGCTTCTAGGAATTTGGGGCTGCTCTGGAAAACTCATCTGCtgatagcaagcttgcc	3	0	72	20	143	96
1551	BG505_gp41_78_T	aggaattctacgctgagtAAACAGCTCCAGGCAAGGGTCCTGGCTGTGGAAAGATACCTAAGGACCCAACAGCTTCTAGGAATTTGGGGCTGCTCTGGAAAACTCATCTGCtgatagcaagcttgcc	3	2	16	0	101	59
1552	BG505_gp41_78_W	aggaattctacgctgagtAAACAGCTCCAGGCAAGGGTCCTGGCTGTGGAAAGATACCTAAGGTGGCAACAGCTTCTAGGAATTTGGGGCTGCTCTGGAAAACTCATCTGCtgatagcaagcttgcc	2	3	8	0	49	40
1553	BG505_gp41_78_C	aggaattctacgctgagtAAACAGCTCCAGGCAAGGGTCCTGGCTGTGGAAAGATACCTAAGGTGCCAACAGCTTCTAGGAATTTGGGGCTGCTCTGGAAAACTCATCTGCtgatagcaagcttgcc	4	5	35	15	302	198
1554	BG505_gp41_78_Y	aggaattctacgctgagtAAACAGCTCCAGGCAAGGGTCCTGGCTGTGGAAAGATACCTAAGGTACCAACAGCTTCTAGGAATTTGGGGCTGCTCTGGAAAACTCATCTGCtgatagcaagcttgcc	4	3	2	6	220	135
1555	BG505_gp41_78_L	aggaattctacgctgagtAAACAGCTCCAGGCAAGGGTCCTGGCTGTGGAAAGATACCTAAGGCTGCAACAGCTTCTAGGAATTTGGGGCTGCTCTGGAAAACTCATCTGCtgatagcaagcttgcc	1	4	7	1	71	76
1556	BG505_gp41_78_F	aggaattctacgctgagtAAACAGCTCCAGGCAAGGGTCCTGGCTGTGGAAAGATACCTAAGGTTCCAACAGCTTCTAGGAATTTGGGGCTGCTCTGGAAAACTCATCTGCtgatagcaagcttgcc	3	0	36	17	191	133
1557	BG505_gp41_78_Q	aggaattctacgctgagtAAACAGCTCCAGGCAAGGGTCCTGGCTGTGGAAAGATACCTAAGGCAGCAACAGCTTCTAGGAATTTGGGGCTGCTCTGGAAAACTCATCTGCtgatagcaagcttgcc	1	2	1	6	112	68
1558	BG505_gp41_78_H	aggaattctacgctgagtAAACAGCTCCAGGCAAGGGTCCTGGCTGTGGAAAGATACCTAAGGCACCAACAGCTTCTAGGAATTTGGGGCTGCTCTGGAAAACTCATCTGCtgatagcaagcttgcc	0	1	33	12	161	85
1559	BG505_gp41_78_P	aggaattctacgctgagtAAACAGCTCCAGGCAAGGGTCCTGGCTGTGGAAAGATACCTAAGGCCGCAACAGCTTCTAGGAATTTGGGGCTGCTCTGGAAAACTCATCTGCtgatagcaagcttgcc	2	5	14	3	188	119
1560	BG505_gp41_79_G	aggaattctacgctgagtCAGCTCCAGGCAAGGGTCCTGGCTGTGGAAAGATACCTAAGGGATGGTCAGCTTCTAGGAATTTGGGGCTGCTCTGGAAAACTCATCTGCACCtgatagcaagcttgcc	10	7	35	40	539	409
1561	BG505_gp41_79_E	aggaattctacgctgagtCAGCTCCAGGCAAGGGTCCTGGCTGTGGAAAGATACCTAAGGGATGAACAGCTTCTAGGAATTTGGGGCTGCTCTGGAAAACTCATCTGCACCtgatagcaagcttgcc	9	16	30	27	709	502
1562	BG505_gp41_79_D	aggaattctacgctgagtCAGCTCCAGGCAAGGGTCCTGGCTGTGGAAAGATACCTAAGGGATGACCAGCTTCTAGGAATTTGGGGCTGCTCTGGAAAACTCATCTGCACCtgatagcaagcttgcc	8	11	48	23	547	349
1563	BG505_gp41_79_V	aggaattctacgctgagtCAGCTCCAGGCAAGGGTCCTGGCTGTGGAAAGATACCTAAGGGATGTTCAGCTTCTAGGAATTTGGGGCTGCTCTGGAAAACTCATCTGCACCtgatagcaagcttgcc	1	6	8	2	183	133
1564	BG505_gp41_79_A	aggaattctacgctgagtCAGCTCCAGGCAAGGGTCCTGGCTGTGGAAAGATACCTAAGGGATGCTCAGCTTCTAGGAATTTGGGGCTGCTCTGGAAAACTCATCTGCACCtgatagcaagcttgcc	3	1	13	0	116	82
1565	BG505_gp41_79_R	aggaattctacgctgagtCAGCTCCAGGCAAGGGTCCTGGCTGTGGAAAGATACCTAAGGGATCGTCAGCTTCTAGGAATTTGGGGCTGCTCTGGAAAACTCATCTGCACCtgatagcaagcttgcc	2	12	19	6	524	359
1566	BG505_gp41_79_S	aggaattctacgctgagtCAGCTCCAGGCAAGGGTCCTGGCTGTGGAAAGATACCTAAGGGATTCTCAGCTTCTAGGAATTTGGGGCTGCTCTGGAAAACTCATCTGCACCtgatagcaagcttgcc	14	11	30	42	821	634
1567	BG505_gp41_79_K	aggaattctacgctgagtCAGCTCCAGGCAAGGGTCCTGGCTGTGGAAAGATACCTAAGGGATAAACAGCTTCTAGGAATTTGGGGCTGCTCTGGAAAACTCATCTGCACCtgatagcaagcttgcc	16	18	54	114	924	688
1568	BG505_gp41_79_N	aggaattctacgctgagtCAGCTCCAGGCAAGGGTCCTGGCTGTGGAAAGATACCTAAGGGATAACCAGCTTCTAGGAATTTGGGGCTGCTCTGGAAAACTCATCTGCACCtgatagcaagcttgcc	3	14	29	18	350	241
1569	BG505_gp41_79_M	aggaattctacgctgagtCAGCTCCAGGCAAGGGTCCTGGCTGTGGAAAGATACCTAAGGGATATGCAGCTTCTAGGAATTTGGGGCTGCTCTGGAAAACTCATCTGCACCtgatagcaagcttgcc	1	1	8	3	128	91
1570	BG505_gp41_79_I	aggaattctacgctgagtCAGCTCCAGGCAAGGGTCCTGGCTGTGGAAAGATACCTAAGGGATATCCAGCTTCTAGGAATTTGGGGCTGCTCTGGAAAACTCATCTGCACCtgatagcaagcttgcc	0	2	1	0	106	82
1571	BG505_gp41_79_T	aggaattctacgctgagtCAGCTCCAGGCAAGGGTCCTGGCTGTGGAAAGATACCTAAGGGATACCCAGCTTCTAGGAATTTGGGGCTGCTCTGGAAAACTCATCTGCACCtgatagcaagcttgcc	3	4	16	15	202	122
1572	BG505_gp41_79_W	aggaattctacgctgagtCAGCTCCAGGCAAGGGTCCTGGCTGTGGAAAGATACCTAAGGGATTGGCAGCTTCTAGGAATTTGGGGCTGCTCTGGAAAACTCATCTGCACCtgatagcaagcttgcc	3	3	5	4	333	262
1573	BG505_gp41_79_C	aggaattctacgctgagtCAGCTCCAGGCAAGGGTCCTGGCTGTGGAAAGATACCTAAGGGATTGCCAGCTTCTAGGAATTTGGGGCTGCTCTGGAAAACTCATCTGCACCtgatagcaagcttgcc	3	4	16	3	187	154
1574	BG505_gp41_79_Y	aggaattctacgctgagtCAGCTCCAGGCAAGGGTCCTGGCTGTGGAAAGATACCTAAGGGATTACCAGCTTCTAGGAATTTGGGGCTGCTCTGGAAAACTCATCTGCACCtgatagcaagcttgcc	5	2	12	20	190	144
1575	BG505_gp41_79_L	aggaattctacgctgagtCAGCTCCAGGCAAGGGTCCTGGCTGTGGAAAGATACCTAAGGGATCTGCAGCTTCTAGGAATTTGGGGCTGCTCTGGAAAACTCATCTGCACCtgatagcaagcttgcc	1	0	3	0	145	99
1576	BG505_gp41_79_F	aggaattctacgctgagtCAGCTCCAGGCAAGGGTCCTGGCTGTGGAAAGATACCTAAGGGATTTCCAGCTTCTAGGAATTTGGGGCTGCTCTGGAAAACTCATCTGCACCtgatagcaagcttgcc	9	15	37	46	408	321
1577	BG505_gp41_79_Q	aggaattctacgctgagtCAGCTCCAGGCAAGGGTCCTGGCTGTGGAAAGATACCTAAGGGATCAGCAGCTTCTAGGAATTTGGGGCTGCTCTGGAAAACTCATCTGCACCtgatagcaagcttgcc	7	5	1	30	266	185
1578	BG505_gp41_79_H	aggaattctacgctgagtCAGCTCCAGGCAAGGGTCCTGGCTGTGGAAAGATACCTAAGGGATCACCAGCTTCTAGGAATTTGGGGCTGCTCTGGAAAACTCATCTGCACCtgatagcaagcttgcc	1	6	3	28	241	190
1579	BG505_gp41_79_P	aggaattctacgctgagtCAGCTCCAGGCAAGGGTCCTGGCTGTGGAAAGATACCTAAGGGATCCGCAGCTTCTAGGAATTTGGGGCTGCTCTGGAAAACTCATCTGCACCtgatagcaagcttgcc	15	16	41	68	1014	744
1580	BG505_gp41_80_G	aggaattctacgctgagtCTCCAGGCAAGGGTCCTGGCTGTGGAAAGATACCTAAGGGATCAAGGTCTTCTAGGAATTTGGGGCTGCTCTGGAAAACTCATCTGCACCACTtgatagcaagcttgcc	10	16	50	52	628	504
1581	BG505_gp41_80_E	aggaattctacgctgagtCTCCAGGCAAGGGTCCTGGCTGTGGAAAGATACCTAAGGGATCAAGAACTTCTAGGAATTTGGGGCTGCTCTGGAAAACTCATCTGCACCACTtgatagcaagcttgcc	5	11	16	18	400	369
1582	BG505_gp41_80_D	aggaattctacgctgagtCTCCAGGCAAGGGTCCTGGCTGTGGAAAGATACCTAAGGGATCAAGACCTTCTAGGAATTTGGGGCTGCTCTGGAAAACTCATCTGCACCACTtgatagcaagcttgcc	11	7	31	23	589	496
1583	BG505_gp41_80_V	aggaattctacgctgagtCTCCAGGCAAGGGTCCTGGCTGTGGAAAGATACCTAAGGGATCAAGTTCTTCTAGGAATTTGGGGCTGCTCTGGAAAACTCATCTGCACCACTtgatagcaagcttgcc	5	7	50	40	393	336
1584	BG505_gp41_80_A	aggaattctacgctgagtCTCCAGGCAAGGGTCCTGGCTGTGGAAAGATACCTAAGGGATCAAGCTCTTCTAGGAATTTGGGGCTGCTCTGGAAAACTCATCTGCACCACTtgatagcaagcttgcc	7	4	23	0	358	324
1585	BG505_gp41_80_R	aggaattctacgctgagtCTCCAGGCAAGGGTCCTGGCTGTGGAAAGATACCTAAGGGATCAACGTCTTCTAGGAATTTGGGGCTGCTCTGGAAAACTCATCTGCACCACTtgatagcaagcttgcc	9	6	65	42	323	258
1586	BG505_gp41_80_S	aggaattctacgctgagtCTCCAGGCAAGGGTCCTGGCTGTGGAAAGATACCTAAGGGATCAATCTCTTCTAGGAATTTGGGGCTGCTCTGGAAAACTCATCTGCACCACTtgatagcaagcttgcc	6	11	29	1	233	184
1587	BG505_gp41_80_K	aggaattctacgctgagtCTCCAGGCAAGGGTCCTGGCTGTGGAAAGATACCTAAGGGATCAAAAACTTCTAGGAATTTGGGGCTGCTCTGGAAAACTCATCTGCACCACTtgatagcaagcttgcc	10	10	34	33	459	361
1588	BG505_gp41_80_N	aggaattctacgctgagtCTCCAGGCAAGGGTCCTGGCTGTGGAAAGATACCTAAGGGATCAAAACCTTCTAGGAATTTGGGGCTGCTCTGGAAAACTCATCTGCACCACTtgatagcaagcttgcc	0	8	5	10	215	196
1589	BG505_gp41_80_M	aggaattctacgctgagtCTCCAGGCAAGGGTCCTGGCTGTGGAAAGATACCTAAGGGATCAAATGCTTCTAGGAATTTGGGGCTGCTCTGGAAAACTCATCTGCACCACTtgatagcaagcttgcc	2	5	2	2	154	155
1590	BG505_gp41_80_I	aggaattctacgctgagtCTCCAGGCAAGGGTCCTGGCTGTGGAAAGATACCTAAGGGATCAAATCCTTCTAGGAATTTGGGGCTGCTCTGGAAAACTCATCTGCACCACTtgatagcaagcttgcc	13	14	116	76	985	764
1591	BG505_gp41_80_T	aggaattctacgctgagtCTCCAGGCAAGGGTCCTGGCTGTGGAAAGATACCTAAGGGATCAAACCCTTCTAGGAATTTGGGGCTGCTCTGGAAAACTCATCTGCACCACTtgatagcaagcttgcc	14	11	61	16	579	446
1592	BG505_gp41_80_W	aggaattctacgctgagtCTCCAGGCAAGGGTCCTGGCTGTGGAAAGATACCTAAGGGATCAATGGCTTCTAGGAATTTGGGGCTGCTCTGGAAAACTCATCTGCACCACTtgatagcaagcttgcc	5	1	0	6	175	118
1593	BG505_gp41_80_C	aggaattctacgctgagtCTCCAGGCAAGGGTCCTGGCTGTGGAAAGATACCTAAGGGATCAATGCCTTCTAGGAATTTGGGGCTGCTCTGGAAAACTCATCTGCACCACTtgatagcaagcttgcc	3	4	9	55	232	166
1594	BG505_gp41_80_Y	aggaattctacgctgagtCTCCAGGCAAGGGTCCTGGCTGTGGAAAGATACCTAAGGGATCAATACCTTCTAGGAATTTGGGGCTGCTCTGGAAAACTCATCTGCACCACTtgatagcaagcttgcc	9	16	36	102	550	436
1595	BG505_gp41_80_L	aggaattctacgctgagtCTCCAGGCAAGGGTCCTGGCTGTGGAAAGATACCTAAGGGATCAACTGCTTCTAGGAATTTGGGGCTGCTCTGGAAAACTCATCTGCACCACTtgatagcaagcttgcc	14	7	89	55	806	622
1596	BG505_gp41_80_F	aggaattctacgctgagtCTCCAGGCAAGGGTCCTGGCTGTGGAAAGATACCTAAGGGATCAATTCCTTCTAGGAATTTGGGGCTGCTCTGGAAAACTCATCTGCACCACTtgatagcaagcttgcc	2	4	4	35	192	157
1597	BG505_gp41_80_Q	aggaattctacgctgagtCTCCAGGCAAGGGTCCTGGCTGTGGAAAGATACCTAAGGGATCAACAGCTTCTAGGAATTTGGGGCTGCTCTGGAAAACTCATCTGCACCACTtgatagcaagcttgcc	12	15	28	7	591	450
1598	BG505_gp41_80_H	aggaattctacgctgagtCTCCAGGCAAGGGTCCTGGCTGTGGAAAGATACCTAAGGGATCAACACCTTCTAGGAATTTGGGGCTGCTCTGGAAAACTCATCTGCACCACTtgatagcaagcttgcc	5	12	47	26	735	495
1599	BG505_gp41_80_P	aggaattctacgctgagtCTCCAGGCAAGGGTCCTGGCTGTGGAAAGATACCTAAGGGATCAACCGCTTCTAGGAATTTGGGGCTGCTCTGGAAAACTCATCTGCACCACTtgatagcaagcttgcc	15	8	17	11	542	410
1600	BG505_gp41_81_G	aggaattctacgctgagtCAGGCAAGGGTCCTGGCTGTGGAAAGATACCTAAGGGATCAACAGGGTCTAGGAATTTGGGGCTGCTCTGGAAAACTCATCTGCACCACTAATtgatagcaagcttgcc	6	3	28	40	520	369
1601	BG505_gp41_81_E	aggaattctacgctgagtCAGGCAAGGGTCCTGGCTGTGGAAAGATACCTAAGGGATCAACAGGAACTAGGAATTTGGGGCTGCTCTGGAAAACTCATCTGCACCACTAATtgatagcaagcttgcc	21	17	61	57	741	582
1602	BG505_gp41_81_D	aggaattctacgctgagtCAGGCAAGGGTCCTGGCTGTGGAAAGATACCTAAGGGATCAACAGGACCTAGGAATTTGGGGCTGCTCTGGAAAACTCATCTGCACCACTAATtgatagcaagcttgcc	13	13	41	31	446	334
1603	BG505_gp41_81_V	aggaattctacgctgagtCAGGCAAGGGTCCTGGCTGTGGAAAGATACCTAAGGGATCAACAGGTTCTAGGAATTTGGGGCTGCTCTGGAAAACTCATCTGCACCACTAATtgatagcaagcttgcc	3	4	19	22	214	165
1604	BG505_gp41_81_A	aggaattctacgctgagtCAGGCAAGGGTCCTGGCTGTGGAAAGATACCTAAGGGATCAACAGGCTCTAGGAATTTGGGGCTGCTCTGGAAAACTCATCTGCACCACTAATtgatagcaagcttgcc	1	5	28	6	310	192
1605	BG505_gp41_81_R	aggaattctacgctgagtCAGGCAAGGGTCCTGGCTGTGGAAAGATACCTAAGGGATCAACAGCGTCTAGGAATTTGGGGCTGCTCTGGAAAACTCATCTGCACCACTAATtgatagcaagcttgcc	12	19	47	52	522	372
1606	BG505_gp41_81_S	aggaattctacgctgagtCAGGCAAGGGTCCTGGCTGTGGAAAGATACCTAAGGGATCAACAGTCTCTAGGAATTTGGGGCTGCTCTGGAAAACTCATCTGCACCACTAATtgatagcaagcttgcc	14	30	160	209	1357	960
1607	BG505_gp41_81_K	aggaattctacgctgagtCAGGCAAGGGTCCTGGCTGTGGAAAGATACCTAAGGGATCAACAGAAACTAGGAATTTGGGGCTGCTCTGGAAAACTCATCTGCACCACTAATtgatagcaagcttgcc	5	4	18	31	280	182
1608	BG505_gp41_81_N	aggaattctacgctgagtCAGGCAAGGGTCCTGGCTGTGGAAAGATACCTAAGGGATCAACAGAACCTAGGAATTTGGGGCTGCTCTGGAAAACTCATCTGCACCACTAATtgatagcaagcttgcc	0	7	45	27	190	150
1609	BG505_gp41_81_M	aggaattctacgctgagtCAGGCAAGGGTCCTGGCTGTGGAAAGATACCTAAGGGATCAACAGATGCTAGGAATTTGGGGCTGCTCTGGAAAACTCATCTGCACCACTAATtgatagcaagcttgcc	12	17	47	129	740	549
1610	BG505_gp41_81_I	aggaattctacgctgagtCAGGCAAGGGTCCTGGCTGTGGAAAGATACCTAAGGGATCAACAGATCCTAGGAATTTGGGGCTGCTCTGGAAAACTCATCTGCACCACTAATtgatagcaagcttgcc	26	25	124	233	1267	994
1611	BG505_gp41_81_T	aggaattctacgctgagtCAGGCAAGGGTCCTGGCTGTGGAAAGATACCTAAGGGATCAACAGACCCTAGGAATTTGGGGCTGCTCTGGAAAACTCATCTGCACCACTAATtgatagcaagcttgcc	3	7	39	71	563	476
1612	BG505_gp41_81_W	aggaattctacgctgagtCAGGCAAGGGTCCTGGCTGTGGAAAGATACCTAAGGGATCAACAGTGGCTAGGAATTTGGGGCTGCTCTGGAAAACTCATCTGCACCACTAATtgatagcaagcttgcc	2	3	16	1	111	83
1613	BG505_gp41_81_C	aggaattctacgctgagtCAGGCAAGGGTCCTGGCTGTGGAAAGATACCTAAGGGATCAACAGTGCCTAGGAATTTGGGGCTGCTCTGGAAAACTCATCTGCACCACTAATtgatagcaagcttgcc	1	5	19	5	267	211
1614	BG505_gp41_81_Y	aggaattctacgctgagtCAGGCAAGGGTCCTGGCTGTGGAAAGATACCTAAGGGATCAACAGTACCTAGGAATTTGGGGCTGCTCTGGAAAACTCATCTGCACCACTAATtgatagcaagcttgcc	11	12	22	86	795	563
1615	BG505_gp41_81_L	aggaattctacgctgagtCAGGCAAGGGTCCTGGCTGTGGAAAGATACCTAAGGGATCAACAGCTGCTAGGAATTTGGGGCTGCTCTGGAAAACTCATCTGCACCACTAATtgatagcaagcttgcc	7	2	1	27	173	117
1616	BG505_gp41_81_F	aggaattctacgctgagtCAGGCAAGGGTCCTGGCTGTGGAAAGATACCTAAGGGATCAACAGTTCCTAGGAATTTGGGGCTGCTCTGGAAAACTCATCTGCACCACTAATtgatagcaagcttgcc	15	19	174	321	904	608
1617	BG505_gp41_81_Q	aggaattctacgctgagtCAGGCAAGGGTCCTGGCTGTGGAAAGATACCTAAGGGATCAACAGCAGCTAGGAATTTGGGGCTGCTCTGGAAAACTCATCTGCACCACTAATtgatagcaagcttgcc	26	33	115	135	1284	887
1618	BG505_gp41_81_H	aggaattctacgctgagtCAGGCAAGGGTCCTGGCTGTGGAAAGATACCTAAGGGATCAACAGCACCTAGGAATTTGGGGCTGCTCTGGAAAACTCATCTGCACCACTAATtgatagcaagcttgcc	7	2	13	50	240	172
1619	BG505_gp41_81_P	aggaattctacgctgagtCAGGCAAGGGTCCTGGCTGTGGAAAGATACCTAAGGGATCAACAGCCGCTAGGAATTTGGGGCTGCTCTGGAAAACTCATCTGCACCACTAATtgatagcaagcttgcc	11	12	35	119	540	388
1620	BG505_gp41_82_G	aggaattctacgctgagtGCAAGGGTCCTGGCTGTGGAAAGATACCTAAGGGATCAACAGCTTGGTGGAATTTGGGGCTGCTCTGGAAAACTCATCTGCACCACTAATGTGtgatagcaagcttgcc	13	7	28	77	417	324
1621	BG505_gp41_82_E	aggaattctacgctgagtGCAAGGGTCCTGGCTGTGGAAAGATACCTAAGGGATCAACAGCTTGAAGGAATTTGGGGCTGCTCTGGAAAACTCATCTGCACCACTAATGTGtgatagcaagcttgcc	4	3	8	32	336	244
1622	BG505_gp41_82_D	aggaattctacgctgagtGCAAGGGTCCTGGCTGTGGAAAGATACCTAAGGGATCAACAGCTTGACGGAATTTGGGGCTGCTCTGGAAAACTCATCTGCACCACTAATGTGtgatagcaagcttgcc	3	0	0	9	180	118
1623	BG505_gp41_82_V	aggaattctacgctgagtGCAAGGGTCCTGGCTGTGGAAAGATACCTAAGGGATCAACAGCTTGTTGGAATTTGGGGCTGCTCTGGAAAACTCATCTGCACCACTAATGTGtgatagcaagcttgcc	36	18	94	24	1106	825
1624	BG505_gp41_82_A	aggaattctacgctgagtGCAAGGGTCCTGGCTGTGGAAAGATACCTAAGGGATCAACAGCTTGCTGGAATTTGGGGCTGCTCTGGAAAACTCATCTGCACCACTAATGTGtgatagcaagcttgcc	5	6	30	10	202	196
1625	BG505_gp41_82_R	aggaattctacgctgagtGCAAGGGTCCTGGCTGTGGAAAGATACCTAAGGGATCAACAGCTTCGTGGAATTTGGGGCTGCTCTGGAAAACTCATCTGCACCACTAATGTGtgatagcaagcttgcc	7	9	28	35	552	406
1626	BG505_gp41_82_S	aggaattctacgctgagtGCAAGGGTCCTGGCTGTGGAAAGATACCTAAGGGATCAACAGCTTTCTGGAATTTGGGGCTGCTCTGGAAAACTCATCTGCACCACTAATGTGtgatagcaagcttgcc	14	14	55	66	609	436
1627	BG505_gp41_82_K	aggaattctacgctgagtGCAAGGGTCCTGGCTGTGGAAAGATACCTAAGGGATCAACAGCTTAAAGGAATTTGGGGCTGCTCTGGAAAACTCATCTGCACCACTAATGTGtgatagcaagcttgcc	6	9	11	3	293	169
1628	BG505_gp41_82_N	aggaattctacgctgagtGCAAGGGTCCTGGCTGTGGAAAGATACCTAAGGGATCAACAGCTTAACGGAATTTGGGGCTGCTCTGGAAAACTCATCTGCACCACTAATGTGtgatagcaagcttgcc	4	6	0	41	271	219
1629	BG505_gp41_82_M	aggaattctacgctgagtGCAAGGGTCCTGGCTGTGGAAAGATACCTAAGGGATCAACAGCTTATGGGAATTTGGGGCTGCTCTGGAAAACTCATCTGCACCACTAATGTGtgatagcaagcttgcc	14	14	66	8	883	658
1630	BG505_gp41_82_I	aggaattctacgctgagtGCAAGGGTCCTGGCTGTGGAAAGATACCTAAGGGATCAACAGCTTATCGGAATTTGGGGCTGCTCTGGAAAACTCATCTGCACCACTAATGTGtgatagcaagcttgcc	9	8	38	2	472	386
1631	BG505_gp41_82_T	aggaattctacgctgagtGCAAGGGTCCTGGCTGTGGAAAGATACCTAAGGGATCAACAGCTTACCGGAATTTGGGGCTGCTCTGGAAAACTCATCTGCACCACTAATGTGtgatagcaagcttgcc	19	14	46	62	682	490
1632	BG505_gp41_82_W	aggaattctacgctgagtGCAAGGGTCCTGGCTGTGGAAAGATACCTAAGGGATCAACAGCTTTGGGGAATTTGGGGCTGCTCTGGAAAACTCATCTGCACCACTAATGTGtgatagcaagcttgcc	30	29	52	83	915	651
1633	BG505_gp41_82_C	aggaattctacgctgagtGCAAGGGTCCTGGCTGTGGAAAGATACCTAAGGGATCAACAGCTTTGCGGAATTTGGGGCTGCTCTGGAAAACTCATCTGCACCACTAATGTGtgatagcaagcttgcc	10	5	18	5	420	266
1634	BG505_gp41_82_Y	aggaattctacgctgagtGCAAGGGTCCTGGCTGTGGAAAGATACCTAAGGGATCAACAGCTTTACGGAATTTGGGGCTGCTCTGGAAAACTCATCTGCACCACTAATGTGtgatagcaagcttgcc	8	11	49	9	595	453
1635	BG505_gp41_82_L	aggaattctacgctgagtGCAAGGGTCCTGGCTGTGGAAAGATACCTAAGGGATCAACAGCTTCTGGGAATTTGGGGCTGCTCTGGAAAACTCATCTGCACCACTAATGTGtgatagcaagcttgcc	23	27	71	40	1387	1035
1636	BG505_gp41_82_F	aggaattctacgctgagtGCAAGGGTCCTGGCTGTGGAAAGATACCTAAGGGATCAACAGCTTTTCGGAATTTGGGGCTGCTCTGGAAAACTCATCTGCACCACTAATGTGtgatagcaagcttgcc	15	7	10	65	554	413
1637	BG505_gp41_82_Q	aggaattctacgctgagtGCAAGGGTCCTGGCTGTGGAAAGATACCTAAGGGATCAACAGCTTCAGGGAATTTGGGGCTGCTCTGGAAAACTCATCTGCACCACTAATGTGtgatagcaagcttgcc	19	15	138	79	1314	940
1638	BG505_gp41_82_H	aggaattctacgctgagtGCAAGGGTCCTGGCTGTGGAAAGATACCTAAGGGATCAACAGCTTCACGGAATTTGGGGCTGCTCTGGAAAACTCATCTGCACCACTAATGTGtgatagcaagcttgcc	14	15	29	16	638	512
1639	BG505_gp41_82_P	aggaattctacgctgagtGCAAGGGTCCTGGCTGTGGAAAGATACCTAAGGGATCAACAGCTTCCGGGAATTTGGGGCTGCTCTGGAAAACTCATCTGCACCACTAATGTGtgatagcaagcttgcc	11	4	35	1	274	239
1640	BG505_gp41_83_G	aggaattctacgctgagtAGGGTCCTGGCTGTGGAAAGATACCTAAGGGATCAACAGCTTCTAGGTATTTGGGGCTGCTCTGGAAAACTCATCTGCACCACTAATGTGCCCtgatagcaagcttgcc	6	3	44	37	358	266
1641	BG505_gp41_83_E	aggaattctacgctgagtAGGGTCCTGGCTGTGGAAAGATACCTAAGGGATCAACAGCTTCTAGAAATTTGGGGCTGCTCTGGAAAACTCATCTGCACCACTAATGTGCCCtgatagcaagcttgcc	10	21	55	67	586	455
1642	BG505_gp41_83_D	aggaattctacgctgagtAGGGTCCTGGCTGTGGAAAGATACCTAAGGGATCAACAGCTTCTAGACATTTGGGGCTGCTCTGGAAAACTCATCTGCACCACTAATGTGCCCtgatagcaagcttgcc	4	5	29	96	513	346
1643	BG505_gp41_83_V	aggaattctacgctgagtAGGGTCCTGGCTGTGGAAAGATACCTAAGGGATCAACAGCTTCTAGTTATTTGGGGCTGCTCTGGAAAACTCATCTGCACCACTAATGTGCCCtgatagcaagcttgcc	9	6	34	35	195	141
1644	BG505_gp41_83_A	aggaattctacgctgagtAGGGTCCTGGCTGTGGAAAGATACCTAAGGGATCAACAGCTTCTAGCTATTTGGGGCTGCTCTGGAAAACTCATCTGCACCACTAATGTGCCCtgatagcaagcttgcc	5	11	28	0	215	145
1645	BG505_gp41_83_R	aggaattctacgctgagtAGGGTCCTGGCTGTGGAAAGATACCTAAGGGATCAACAGCTTCTACGTATTTGGGGCTGCTCTGGAAAACTCATCTGCACCACTAATGTGCCCtgatagcaagcttgcc	13	15	105	106	789	625
1646	BG505_gp41_83_S	aggaattctacgctgagtAGGGTCCTGGCTGTGGAAAGATACCTAAGGGATCAACAGCTTCTATCTATTTGGGGCTGCTCTGGAAAACTCATCTGCACCACTAATGTGCCCtgatagcaagcttgcc	4	6	12	24	289	199
1647	BG505_gp41_83_K	aggaattctacgctgagtAGGGTCCTGGCTGTGGAAAGATACCTAAGGGATCAACAGCTTCTAAAAATTTGGGGCTGCTCTGGAAAACTCATCTGCACCACTAATGTGCCCtgatagcaagcttgcc	8	8	13	47	424	359
1648	BG505_gp41_83_N	aggaattctacgctgagtAGGGTCCTGGCTGTGGAAAGATACCTAAGGGATCAACAGCTTCTAAACATTTGGGGCTGCTCTGGAAAACTCATCTGCACCACTAATGTGCCCtgatagcaagcttgcc	7	3	13	50	365	267
1649	BG505_gp41_83_M	aggaattctacgctgagtAGGGTCCTGGCTGTGGAAAGATACCTAAGGGATCAACAGCTTCTAATGATTTGGGGCTGCTCTGGAAAACTCATCTGCACCACTAATGTGCCCtgatagcaagcttgcc	4	2	9	50	186	126
1650	BG505_gp41_83_I	aggaattctacgctgagtAGGGTCCTGGCTGTGGAAAGATACCTAAGGGATCAACAGCTTCTAATCATTTGGGGCTGCTCTGGAAAACTCATCTGCACCACTAATGTGCCCtgatagcaagcttgcc	3	5	19	0	217	157
1651	BG505_gp41_83_T	aggaattctacgctgagtAGGGTCCTGGCTGTGGAAAGATACCTAAGGGATCAACAGCTTCTAACCATTTGGGGCTGCTCTGGAAAACTCATCTGCACCACTAATGTGCCCtgatagcaagcttgcc	23	9	39	32	466	372
1652	BG505_gp41_83_W	aggaattctacgctgagtAGGGTCCTGGCTGTGGAAAGATACCTAAGGGATCAACAGCTTCTATGGATTTGGGGCTGCTCTGGAAAACTCATCTGCACCACTAATGTGCCCtgatagcaagcttgcc	4	3	6	11	181	138
1653	BG505_gp41_83_C	aggaattctacgctgagtAGGGTCCTGGCTGTGGAAAGATACCTAAGGGATCAACAGCTTCTATGCATTTGGGGCTGCTCTGGAAAACTCATCTGCACCACTAATGTGCCCtgatagcaagcttgcc	3	2	38	32	143	124
1654	BG505_gp41_83_Y	aggaattctacgctgagtAGGGTCCTGGCTGTGGAAAGATACCTAAGGGATCAACAGCTTCTATACATTTGGGGCTGCTCTGGAAAACTCATCTGCACCACTAATGTGCCCtgatagcaagcttgcc	4	6	19	49	173	139
1655	BG505_gp41_83_L	aggaattctacgctgagtAGGGTCCTGGCTGTGGAAAGATACCTAAGGGATCAACAGCTTCTACTGATTTGGGGCTGCTCTGGAAAACTCATCTGCACCACTAATGTGCCCtgatagcaagcttgcc	1	1	12	8	180	139
1656	BG505_gp41_83_F	aggaattctacgctgagtAGGGTCCTGGCTGTGGAAAGATACCTAAGGGATCAACAGCTTCTATTCATTTGGGGCTGCTCTGGAAAACTCATCTGCACCACTAATGTGCCCtgatagcaagcttgcc	3	5	18	23	255	217
1657	BG505_gp41_83_Q	aggaattctacgctgagtAGGGTCCTGGCTGTGGAAAGATACCTAAGGGATCAACAGCTTCTACAGATTTGGGGCTGCTCTGGAAAACTCATCTGCACCACTAATGTGCCCtgatagcaagcttgcc	4	5	26	111	390	313
1658	BG505_gp41_83_H	aggaattctacgctgagtAGGGTCCTGGCTGTGGAAAGATACCTAAGGGATCAACAGCTTCTACACATTTGGGGCTGCTCTGGAAAACTCATCTGCACCACTAATGTGCCCtgatagcaagcttgcc	7	4	20	18	244	158
1659	BG505_gp41_83_P	aggaattctacgctgagtAGGGTCCTGGCTGTGGAAAGATACCTAAGGGATCAACAGCTTCTACCGATTTGGGGCTGCTCTGGAAAACTCATCTGCACCACTAATGTGCCCtgatagcaagcttgcc	5	7	10	87	282	228
1660	BG505_gp41_84_G	aggaattctacgctgagtGTCCTGGCTGTGGAAAGATACCTAAGGGATCAACAGCTTCTAGGAGGTTGGGGCTGCTCTGGAAAACTCATCTGCACCACTAATGTGCCCTGGtgatagcaagcttgcc	11	16	82	30	1065	875
1661	BG505_gp41_84_E	aggaattctacgctgagtGTCCTGGCTGTGGAAAGATACCTAAGGGATCAACAGCTTCTAGGAGAATGGGGCTGCTCTGGAAAACTCATCTGCACCACTAATGTGCCCTGGtgatagcaagcttgcc	19	12	73	42	899	673
1662	BG505_gp41_84_D	aggaattctacgctgagtGTCCTGGCTGTGGAAAGATACCTAAGGGATCAACAGCTTCTAGGAGACTGGGGCTGCTCTGGAAAACTCATCTGCACCACTAATGTGCCCTGGtgatagcaagcttgcc	20	19	73	60	1132	790
1663	BG505_gp41_84_V	aggaattctacgctgagtGTCCTGGCTGTGGAAAGATACCTAAGGGATCAACAGCTTCTAGGAGTTTGGGGCTGCTCTGGAAAACTCATCTGCACCACTAATGTGCCCTGGtgatagcaagcttgcc	9	2	27	14	313	266
1664	BG505_gp41_84_A	aggaattctacgctgagtGTCCTGGCTGTGGAAAGATACCTAAGGGATCAACAGCTTCTAGGAGCTTGGGGCTGCTCTGGAAAACTCATCTGCACCACTAATGTGCCCTGGtgatagcaagcttgcc	16	18	61	96	625	474
1665	BG505_gp41_84_R	aggaattctacgctgagtGTCCTGGCTGTGGAAAGATACCTAAGGGATCAACAGCTTCTAGGACGTTGGGGCTGCTCTGGAAAACTCATCTGCACCACTAATGTGCCCTGGtgatagcaagcttgcc	7	7	43	95	671	440
1666	BG505_gp41_84_S	aggaattctacgctgagtGTCCTGGCTGTGGAAAGATACCTAAGGGATCAACAGCTTCTAGGATCTTGGGGCTGCTCTGGAAAACTCATCTGCACCACTAATGTGCCCTGGtgatagcaagcttgcc	13	18	99	90	975	716
1667	BG505_gp41_84_K	aggaattctacgctgagtGTCCTGGCTGTGGAAAGATACCTAAGGGATCAACAGCTTCTAGGAAAATGGGGCTGCTCTGGAAAACTCATCTGCACCACTAATGTGCCCTGGtgatagcaagcttgcc	6	3	30	11	346	283
1668	BG505_gp41_84_N	aggaattctacgctgagtGTCCTGGCTGTGGAAAGATACCTAAGGGATCAACAGCTTCTAGGAAACTGGGGCTGCTCTGGAAAACTCATCTGCACCACTAATGTGCCCTGGtgatagcaagcttgcc	11	10	62	137	878	685
1669	BG505_gp41_84_M	aggaattctacgctgagtGTCCTGGCTGTGGAAAGATACCTAAGGGATCAACAGCTTCTAGGAATGTGGGGCTGCTCTGGAAAACTCATCTGCACCACTAATGTGCCCTGGtgatagcaagcttgcc	17	11	50	36	486	400
1670	BG505_gp41_84_I	aggaattctacgctgagtGTCCTGGCTGTGGAAAGATACCTAAGGGATCAACAGCTTCTAGGAATCTGGGGCTGCTCTGGAAAACTCATCTGCACCACTAATGTGCCCTGGtgatagcaagcttgcc	14	9	49	140	802	645
1671	BG505_gp41_84_T	aggaattctacgctgagtGTCCTGGCTGTGGAAAGATACCTAAGGGATCAACAGCTTCTAGGAACCTGGGGCTGCTCTGGAAAACTCATCTGCACCACTAATGTGCCCTGGtgatagcaagcttgcc	7	22	39	46	585	459
1672	BG505_gp41_84_W	aggaattctacgctgagtGTCCTGGCTGTGGAAAGATACCTAAGGGATCAACAGCTTCTAGGATGGTGGGGCTGCTCTGGAAAACTCATCTGCACCACTAATGTGCCCTGGtgatagcaagcttgcc	31	47	210	398	1998	1636
1673	BG505_gp41_84_C	aggaattctacgctgagtGTCCTGGCTGTGGAAAGATACCTAAGGGATCAACAGCTTCTAGGATGCTGGGGCTGCTCTGGAAAACTCATCTGCACCACTAATGTGCCCTGGtgatagcaagcttgcc	6	6	26	46	418	291
1674	BG505_gp41_84_Y	aggaattctacgctgagtGTCCTGGCTGTGGAAAGATACCTAAGGGATCAACAGCTTCTAGGATACTGGGGCTGCTCTGGAAAACTCATCTGCACCACTAATGTGCCCTGGtgatagcaagcttgcc	5	6	34	0	303	225
1675	BG505_gp41_84_L	aggaattctacgctgagtGTCCTGGCTGTGGAAAGATACCTAAGGGATCAACAGCTTCTAGGACTGTGGGGCTGCTCTGGAAAACTCATCTGCACCACTAATGTGCCCTGGtgatagcaagcttgcc	5	4	11	36	351	283
1676	BG505_gp41_84_F	aggaattctacgctgagtGTCCTGGCTGTGGAAAGATACCTAAGGGATCAACAGCTTCTAGGATTCTGGGGCTGCTCTGGAAAACTCATCTGCACCACTAATGTGCCCTGGtgatagcaagcttgcc	5	5	21	11	181	188
1677	BG505_gp41_84_Q	aggaattctacgctgagtGTCCTGGCTGTGGAAAGATACCTAAGGGATCAACAGCTTCTAGGACAGTGGGGCTGCTCTGGAAAACTCATCTGCACCACTAATGTGCCCTGGtgatagcaagcttgcc	10	16	18	84	621	486
1678	BG505_gp41_84_H	aggaattctacgctgagtGTCCTGGCTGTGGAAAGATACCTAAGGGATCAACAGCTTCTAGGACACTGGGGCTGCTCTGGAAAACTCATCTGCACCACTAATGTGCCCTGGtgatagcaagcttgcc	14	7	29	61	597	403
1679	BG505_gp41_84_P	aggaattctacgctgagtGTCCTGGCTGTGGAAAGATACCTAAGGGATCAACAGCTTCTAGGACCGTGGGGCTGCTCTGGAAAACTCATCTGCACCACTAATGTGCCCTGGtgatagcaagcttgcc	8	25	60	92	575	488
1680	BG505_gp41_85_G	aggaattctacgctgagtCTGGCTGTGGAAAGATACCTAAGGGATCAACAGCTTCTAGGAATTGGTGGCTGCTCTGGAAAACTCATCTGCACCACTAATGTGCCCTGGAACtgatagcaagcttgcc	10	9	82	43	654	510
1681	BG505_gp41_85_E	aggaattctacgctgagtCTGGCTGTGGAAAGATACCTAAGGGATCAACAGCTTCTAGGAATTGAAGGCTGCTCTGGAAAACTCATCTGCACCACTAATGTGCCCTGGAACtgatagcaagcttgcc	31	16	46	25	919	725
1682	BG505_gp41_85_D	aggaattctacgctgagtCTGGCTGTGGAAAGATACCTAAGGGATCAACAGCTTCTAGGAATTGACGGCTGCTCTGGAAAACTCATCTGCACCACTAATGTGCCCTGGAACtgatagcaagcttgcc	6	6	3	0	249	194
1683	BG505_gp41_85_V	aggaattctacgctgagtCTGGCTGTGGAAAGATACCTAAGGGATCAACAGCTTCTAGGAATTGTTGGCTGCTCTGGAAAACTCATCTGCACCACTAATGTGCCCTGGAACtgatagcaagcttgcc	16	13	86	86	845	698
1684	BG505_gp41_85_A	aggaattctacgctgagtCTGGCTGTGGAAAGATACCTAAGGGATCAACAGCTTCTAGGAATTGCTGGCTGCTCTGGAAAACTCATCTGCACCACTAATGTGCCCTGGAACtgatagcaagcttgcc	33	28	113	17	1172	938
1685	BG505_gp41_85_R	aggaattctacgctgagtCTGGCTGTGGAAAGATACCTAAGGGATCAACAGCTTCTAGGTATTCGTGGCTGCTCTGGAAAACTCATCTGCACCACTAATGTGCCCTGGAACtgatagcaagcttgcc	6	13	65	52	649	525
1686	BG505_gp41_85_S	aggaattctacgctgagtCTGGCTGTGGAAAGATACCTAAGGGATCAACAGCTTCTAGGAATTTCTGGCTGCTCTGGAAAACTCATCTGCACCACTAATGTGCCCTGGAACtgatagcaagcttgcc	4	12	25	75	806	589
1687	BG505_gp41_85_K	aggaattctacgctgagtCTGGCTGTGGAAAGATACCTAAGGGATCAACAGCTTCTAGGAATTAAAGGCTGCTCTGGAAAACTCATCTGCACCACTAATGTGCCCTGGAACtgatagcaagcttgcc	3	6	20	51	368	267
1688	BG505_gp41_85_N	aggaattctacgctgagtCTGGCTGTGGAAAGATACCTAAGGGATCAACAGCTTCTAGGAATTAACGGCTGCTCTGGAAAACTCATCTGCACCACTAATGTGCCCTGGAACtgatagcaagcttgcc	9	8	28	52	604	424
1689	BG505_gp41_85_M	aggaattctacgctgagtCTGGCTGTGGAAAGATACCTAAGGGATCAACAGCTTCTAGGAATTATGGGCTGCTCTGGAAAACTCATCTGCACCACTAATGTGCCCTGGAACtgatagcaagcttgcc	7	3	55	39	403	299
1690	BG505_gp41_85_I	aggaattctacgctgagtCTGGCTGTGGAAAGATACCTAAGGGATCAACAGCTTCTAGGAATTATCGGCTGCTCTGGAAAACTCATCTGCACCACTAATGTGCCCTGGAACtgatagcaagcttgcc	4	5	36	9	561	411
1691	BG505_gp41_85_T	aggaattctacgctgagtCTGGCTGTGGAAAGATACCTAAGGGATCAACAGCTTCTAGGAATTACCGGCTGCTCTGGAAAACTCATCTGCACCACTAATGTGCCCTGGAACtgatagcaagcttgcc	15	12	103	163	1030	718
1692	BG505_gp41_85_W	aggaattctacgctgagtCTGGCTGTGGAAAGATACCTAAGGGATCAACAGCTTCTAGGAATTTGGGGCTGCTCTGGAAAACTCATCTGCACCACTAATGTGCCCTGGAACtgatagcaagcttgcc	7	5	89	17	507	355
1693	BG505_gp41_85_C	aggaattctacgctgagtCTGGCTGTGGAAAGATACCTAAGGGATCAACAGCTTCTAGGAATTTGCGGCTGCTCTGGAAAACTCATCTGCACCACTAATGTGCCCTGGAACtgatagcaagcttgcc	9	14	73	36	467	368
1694	BG505_gp41_85_Y	aggaattctacgctgagtCTGGCTGTGGAAAGATACCTAAGGGATCAACAGCTTCTAGGAATTTACGGCTGCTCTGGAAAACTCATCTGCACCACTAATGTGCCCTGGAACtgatagcaagcttgcc	15	12	70	111	783	535
1695	BG505_gp41_85_L	aggaattctacgctgagtCTGGCTGTGGAAAGATACCTAAGGGATCAACAGCTTCTAGGTATTCTGGGCTGCTCTGGAAAACTCATCTGCACCACTAATGTGCCCTGGAACtgatagcaagcttgcc	14	18	93	39	809	621
1696	BG505_gp41_85_F	aggaattctacgctgagtCTGGCTGTGGAAAGATACCTAAGGGATCAACAGCTTCTAGGAATTTTCGGCTGCTCTGGAAAACTCATCTGCACCACTAATGTGCCCTGGAACtgatagcaagcttgcc	21	22	32	58	953	707
1697	BG505_gp41_85_Q	aggaattctacgctgagtCTGGCTGTGGAAAGATACCTAAGGGATCAACAGCTTCTAGGTATTCAGGGCTGCTCTGGAAAACTCATCTGCACCACTAATGTGCCCTGGAACtgatagcaagcttgcc	28	26	108	93	1453	1183
1698	BG505_gp41_85_H	aggaattctacgctgagtCTGGCTGTGGAAAGATACCTAAGGGATCAACAGCTTCTAGGTATTCACGGCTGCTCTGGAAAACTCATCTGCACCACTAATGTGCCCTGGAACtgatagcaagcttgcc	16	18	134	69	1340	957
1699	BG505_gp41_85_P	aggaattctacgctgagtCTGGCTGTGGAAAGATACCTAAGGGATCAACAGCTTCTAGGTATTCCGGGCTGCTCTGGAAAACTCATCTGCACCACTAATGTGCCCTGGAACtgatagcaagcttgcc	27	23	88	116	1072	810
1700	BG505_gp41_86_G	aggaattctacgctgagtGCTGTGGAAAGATACCTAAGGGATCAACAGCTTCTAGGAATTTGGGGTTGCTCTGGAAAACTCATCTGCACCACTAATGTGCCCTGGAACTCTtgatagcaagcttgcc	6	11	46	74	350	239
1701	BG505_gp41_86_E	aggaattctacgctgagtGCTGTGGAAAGATACCTAAGGGATCAACAGCTTCTAGGAATTTGGGAATGCTCTGGAAAACTCATCTGCACCACTAATGTGCCCTGGAACTCTtgatagcaagcttgcc	7	6	42	16	326	225
1702	BG505_gp41_86_D	aggaattctacgctgagtGCTGTGGAAAGATACCTAAGGGATCAACAGCTTCTAGGAATTTGGGACTGCTCTGGAAAACTCATCTGCACCACTAATGTGCCCTGGAACTCTtgatagcaagcttgcc	6	8	14	24	331	250
1703	BG505_gp41_86_V	aggaattctacgctgagtGCTGTGGAAAGATACCTAAGGGATCAACAGCTTCTAGGAATTTGGGTTTGCTCTGGAAAACTCATCTGCACCACTAATGTGCCCTGGAACTCTtgatagcaagcttgcc	5	6	35	11	326	215
1704	BG505_gp41_86_A	aggaattctacgctgagtGCTGTGGAAAGATACCTAAGGGATCAACAGCTTCTAGGAATTTGGGCTTGCTCTGGAAAACTCATCTGCACCACTAATGTGCCCTGGAACTCTtgatagcaagcttgcc	3	3	37	75	265	201
1705	BG505_gp41_86_R	aggaattctacgctgagtGCTGTGGAAAGATACCTAAGGGATCAACAGCTTCTAGGAATTTGGCGTTGCTCTGGAAAACTCATCTGCACCACTAATGTGCCCTGGAACTCTtgatagcaagcttgcc	2	4	43	0	257	169
1706	BG505_gp41_86_S	aggaattctacgctgagtGCTGTGGAAAGATACCTAAGGGATCAACAGCTTCTAGGAATTTGGTCTTGCTCTGGAAAACTCATCTGCACCACTAATGTGCCCTGGAACTCTtgatagcaagcttgcc	2	3	35	34	334	238
1707	BG505_gp41_86_K	aggaattctacgctgagtGCTGTGGAAAGATACCTAAGGGATCAACAGCTTCTAGGAATTTGGAAATGCTCTGGAAAACTCATCTGCACCACTAATGTGCCCTGGAACTCTtgatagcaagcttgcc	2	9	93	60	671	459
1708	BG505_gp41_86_N	aggaattctacgctgagtGCTGTGGAAAGATACCTAAGGGATCAACAGCTTCTAGGAATTTGGAACTGCTCTGGAAAACTCATCTGCACCACTAATGTGCCCTGGAACTCTtgatagcaagcttgcc	5	10	32	110	433	260
1709	BG505_gp41_86_M	aggaattctacgctgagtGCTGTGGAAAGATACCTAAGGGATCAACAGCTTCTAGGAATTTGGATGTGCTCTGGAAAACTCATCTGCACCACTAATGTGCCCTGGAACTCTtgatagcaagcttgcc	6	3	22	33	257	173
1710	BG505_gp41_86_I	aggaattctacgctgagtGCTGTGGAAAGATACCTAAGGGATCAACAGCTTCTAGGAATTTGGATCTGCTCTGGAAAACTCATCTGCACCACTAATGTGCCCTGGAACTCTtgatagcaagcttgcc	3	6	24	7	261	165
1711	BG505_gp41_86_T	aggaattctacgctgagtGCTGTGGAAAGATACCTAAGGGATCAACAGCTTCTAGGAATTTGGACCTGCTCTGGAAAACTCATCTGCACCACTAATGTGCCCTGGAACTCTtgatagcaagcttgcc	17	10	84	118	917	625
1712	BG505_gp41_86_W	aggaattctacgctgagtGCTGTGGAAAGATACCTAAGGGATCAACAGCTTCTAGGAATTTGGTGGTGCTCTGGAAAACTCATCTGCACCACTAATGTGCCCTGGAACTCTtgatagcaagcttgcc	5	4	18	5	234	146
1713	BG505_gp41_86_C	aggaattctacgctgagtGCTGTGGAAAGATACCTAAGGGATCAACAGCTTCTAGGAATTTGGTGCTGCTCTGGAAAACTCATCTGCACCACTAATGTGCCCTGGAACTCTtgatagcaagcttgcc	3	4	57	39	272	183
1714	BG505_gp41_86_Y	aggaattctacgctgagtGCTGTGGAAAGATACCTAAGGGATCAACAGCTTCTAGGAATTTGGTACTGCTCTGGAAAACTCATCTGCACCACTAATGTGCCCTGGAACTCTtgatagcaagcttgcc	8	12	19	33	360	256
1715	BG505_gp41_86_L	aggaattctacgctgagtGCTGTGGAAAGATACCTAAGGGATCAACAGCTTCTAGGAATTTGGCTGTGCTCTGGAAAACTCATCTGCACCACTAATGTGCCCTGGAACTCTtgatagcaagcttgcc	4	4	3	12	195	135
1716	BG505_gp41_86_F	aggaattctacgctgagtGCTGTGGAAAGATACCTAAGGGATCAACAGCTTCTAGGAATTTGGTTCTGCTCTGGAAAACTCATCTGCACCACTAATGTGCCCTGGAACTCTtgatagcaagcttgcc	8	4	47	19	262	174
1717	BG505_gp41_86_Q	aggaattctacgctgagtGCTGTGGAAAGATACCTAAGGGATCAACAGCTTCTAGGAATTTGGCAGTGCTCTGGAAAACTCATCTGCACCACTAATGTGCCCTGGAACTCTtgatagcaagcttgcc	5	9	67	116	517	404
1718	BG505_gp41_86_H	aggaattctacgctgagtGCTGTGGAAAGATACCTAAGGGATCAACAGCTTCTAGGAATTTGGCACTGCTCTGGAAAACTCATCTGCACCACTAATGTGCCCTGGAACTCTtgatagcaagcttgcc	14	11	24	61	572	412
1719	BG505_gp41_86_P	aggaattctacgctgagtGCTGTGGAAAGATACCTAAGGGATCAACAGCTTCTAGGAATTTGGCCGTGCTCTGGAAAACTCATCTGCACCACTAATGTGCCCTGGAACTCTtgatagcaagcttgcc	9	7	8	53	428	249
1720	BG505_gp41_87_G	aggaattctacgctgagtGTGGAAAGATACCTAAGGGATCAACAGCTTCTAGGAATTTGGGGCGGTTCTGGAAAACTCATCTGCACCACTAATGTGCCCTGGAACTCTAGTtgatagcaagcttgcc	7	7	33	69	462	346
1721	BG505_gp41_87_E	aggaattctacgctgagtGTGGAAAGATACCTAAGGGATCAACAGCTTCTAGGAATTTGGGGCGAATCTGGAAAACTCATCTGCACCACTAATGTGCCCTGGAACTCTAGTtgatagcaagcttgcc	8	11	38	43	277	209
1722	BG505_gp41_87_D	aggaattctacgctgagtGTGGAAAGATACCTAAGGGATCAACAGCTTCTAGGAATTTGGGGCGACTCTGGAAAACTCATCTGCACCACTAATGTGCCCTGGAACTCTAGTtgatagcaagcttgcc	10	16	38	16	610	492
1723	BG505_gp41_87_V	aggaattctacgctgagtGTGGAAAGATACCTAAGGGATCAACAGCTTCTAGGAATTTGGGGCGTTTCTGGAAAACTCATCTGCACCACTAATGTGCCCTGGAACTCTAGTtgatagcaagcttgcc	11	17	28	68	561	396
1724	BG505_gp41_87_A	aggaattctacgctgagtGTGGAAAGATACCTAAGGGATCAACAGCTTCTAGGAATTTGGGGCGCTTCTGGAAAACTCATCTGCACCACTAATGTGCCCTGGAACTCTAGTtgatagcaagcttgcc	6	8	20	55	439	348
1725	BG505_gp41_87_R	aggaattctacgctgagtGTGGAAAGATACCTAAGGGATCAACAGCTTCTAGGAATTTGGGGCCGTTCTGGAAAACTCATCTGCACCACTAATGTGCCCTGGAACTCTAGTtgatagcaagcttgcc	15	14	32	60	500	338
1726	BG505_gp41_87_S	aggaattctacgctgagtGTGGAAAGATACCTAAGGGATCAACAGCTTCTAGGAATTTGGGGCTCTTCTGGAAAACTCATCTGCACCACTAATGTGCCCTGGAACTCTAGTtgatagcaagcttgcc	7	10	28	8	258	207
1727	BG505_gp41_87_K	aggaattctacgctgagtGTGGAAAGATACCTAAGGGATCAACAGCTTCTAGGAATTTGGGGCAAATCTGGAAAACTCATCTGCACCACTAATGTGCCCTGGAACTCTAGTtgatagcaagcttgcc	7	7	62	30	404	333
1728	BG505_gp41_87_N	aggaattctacgctgagtGTGGAAAGATACCTAAGGGATCAACAGCTTCTAGGAATTTGGGGCAACTCTGGAAAACTCATCTGCACCACTAATGTGCCCTGGAACTCTAGTtgatagcaagcttgcc	19	31	93	198	1219	885
1729	BG505_gp41_87_M	aggaattctacgctgagtGTGGAAAGATACCTAAGGGATCAACAGCTTCTAGGAATTTGGGGCATGTCTGGAAAACTCATCTGCACCACTAATGTGCCCTGGAACTCTAGTtgatagcaagcttgcc	6	8	40	13	344	268
1730	BG505_gp41_87_I	aggaattctacgctgagtGTGGAAAGATACCTAAGGGATCAACAGCTTCTAGGAATTTGGGGCATCTCTGGAAAACTCATCTGCACCACTAATGTGCCCTGGAACTCTAGTtgatagcaagcttgcc	17	9	79	62	623	440
1731	BG505_gp41_87_T	aggaattctacgctgagtGTGGAAAGATACCTAAGGGATCAACAGCTTCTAGGAATTTGGGGCACCTCTGGAAAACTCATCTGCACCACTAATGTGCCCTGGAACTCTAGTtgatagcaagcttgcc	7	5	32	18	358	275
1732	BG505_gp41_87_W	aggaattctacgctgagtGTGGAAAGATACCTAAGGGATCAACAGCTTCTAGGAATTTGGGGCTGGTCTGGAAAACTCATCTGCACCACTAATGTGCCCTGGAACTCTAGTtgatagcaagcttgcc	11	11	90	43	760	559
1733	BG505_gp41_87_C	aggaattctacgctgagtGTGGAAAGATACCTAAGGGATCAACAGCTTCTAGGAATTTGGGGCTGCTCTGGAAAACTCATCTGCACCACTAATGTGCCCTGGAACTCTAGTtgatagcaagcttgcc	16	12	50	95	577	426
1734	BG505_gp41_87_Y	aggaattctacgctgagtGTGGAAAGATACCTAAGGGATCAACAGCTTCTAGGAATTTGGGGCTACTCTGGAAAACTCATCTGCACCACTAATGTGCCCTGGAACTCTAGTtgatagcaagcttgcc	18	15	52	126	658	424
1735	BG505_gp41_87_L	aggaattctacgctgagtGTGGAAAGATACCTAAGGGATCAACAGCTTCTAGGAATTTGGGGCCTGTCTGGAAAACTCATCTGCACCACTAATGTGCCCTGGAACTCTAGTtgatagcaagcttgcc	12	6	74	60	518	402
1736	BG505_gp41_87_F	aggaattctacgctgagtGTGGAAAGATACCTAAGGGATCAACAGCTTCTAGGAATTTGGGGCTTCTCTGGAAAACTCATCTGCACCACTAATGTGCCCTGGAACTCTAGTtgatagcaagcttgcc	5	9	52	41	439	322
1737	BG505_gp41_87_Q	aggaattctacgctgagtGTGGAAAGATACCTAAGGGATCAACAGCTTCTAGGAATTTGGGGCCAGTCTGGAAAACTCATCTGCACCACTAATGTGCCCTGGAACTCTAGTtgatagcaagcttgcc	3	5	51	55	596	440
1738	BG505_gp41_87_H	aggaattctacgctgagtGTGGAAAGATACCTAAGGGATCAACAGCTTCTAGGAATTTGGGGCCACTCTGGAAAACTCATCTGCACCACTAATGTGCCCTGGAACTCTAGTtgatagcaagcttgcc	12	16	47	83	613	449
1739	BG505_gp41_87_P	aggaattctacgctgagtGTGGAAAGATACCTAAGGGATCAACAGCTTCTAGGAATTTGGGGCCCGTCTGGAAAACTCATCTGCACCACTAATGTGCCCTGGAACTCTAGTtgatagcaagcttgcc	3	4	23	4	267	179
1740	BG505_gp41_88_G	aggaattctacgctgagtGAAAGATACCTAAGGGATCAACAGCTTCTAGGAATTTGGGGCTGCGGTGGAAAACTCATCTGCACCACTAATGTGCCCTGGAACTCTAGTTGGtgatagcaagcttgcc	0	2	0	82	132	88
1741	BG505_gp41_88_E	aggaattctacgctgagtGAAAGATACCTAAGGGATCAACAGCTTCTAGGAATTTGGGGCTGCGAAGGAAAACTCATCTGCACCACTAATGTGCCCTGGAACTCTAGTTGGtgatagcaagcttgcc	3	3	7	72	220	151
1742	BG505_gp41_88_D	aggaattctacgctgagtGAAAGATACCTAAGGGATCAACAGCTTCTAGGAATTTGGGGCTGCGACGGAAAACTCATCTGCACCACTAATGTGCCCTGGAACTCTAGTTGGtgatagcaagcttgcc	2	2	9	36	118	68
1743	BG505_gp41_88_V	aggaattctacgctgagtGAAAGATACCTAAGGGATCAACAGCTTCTAGGAATTTGGGGCTGCGTTGGAAAACTCATCTGCACCACTAATGTGCCCTGGAACTCTAGTTGGtgatagcaagcttgcc	8	2	33	88	475	286
1744	BG505_gp41_88_A	aggaattctacgctgagtGAAAGATACCTAAGGGATCAACAGCTTCTAGGAATTTGGGGCTGCGCTGGAAAACTCATCTGCACCACTAATGTGCCCTGGAACTCTAGTTGGtgatagcaagcttgcc	4	5	32	14	269	164
1745	BG505_gp41_88_R	aggaattctacgctgagtGAAAGATACCTAAGGGATCAACAGCTTCTAGGAATTTGGGGCTGCCGTGGAAAACTCATCTGCACCACTAATGTGCCCTGGAACTCTAGTTGGtgatagcaagcttgcc	4	1	6	0	120	49
1746	BG505_gp41_88_S	aggaattctacgctgagtGAAAGATACCTAAGGGATCAACAGCTTCTAGGAATTTGGGGCTGCTCTGGAAAACTCATCTGCACCACTAATGTGCCCTGGAACTCTAGTTGGtgatagcaagcttgcc	2	4	31	31	222	126
1747	BG505_gp41_88_K	aggaattctacgctgagtGAAAGATACCTAAGGGATCAACAGCTTCTAGGAATTTGGGGCTGCAAAGGAAAACTCATCTGCACCACTAATGTGCCCTGGAACTCTAGTTGGtgatagcaagcttgcc	1	2	15	10	129	72
1748	BG505_gp41_88_N	aggaattctacgctgagtGAAAGATACCTAAGGGATCAACAGCTTCTAGGAATTTGGGGCTGCAACGGAAAACTCATCTGCACCACTAATGTGCCCTGGAACTCTAGTTGGtgatagcaagcttgcc	1	1	20	52	164	142
1749	BG505_gp41_88_M	aggaattctacgctgagtGAAAGATACCTAAGGGATCAACAGCTTCTAGGAATTTGGGGCTGCATGGGAAAACTCATCTGCACCACTAATGTGCCCTGGAACTCTAGTTGGtgatagcaagcttgcc	3	5	18	44	314	221
1750	BG505_gp41_88_I	aggaattctacgctgagtGAAAGATACCTAAGGGATCAACAGCTTCTAGGAATTTGGGGCTGCATCGGAAAACTCATCTGCACCACTAATGTGCCCTGGAACTCTAGTTGGtgatagcaagcttgcc	3	0	9	24	188	128
1751	BG505_gp41_88_T	aggaattctacgctgagtGAAAGATACCTAAGGGATCAACAGCTTCTAGGAATTTGGGGCTGCACCGGAAAACTCATCTGCACCACTAATGTGCCCTGGAACTCTAGTTGGtgatagcaagcttgcc	1	0	0	0	35	39
1752	BG505_gp41_88_W	aggaattctacgctgagtGAAAGATACCTAAGGGATCAACAGCTTCTAGGAATTTGGGGCTGCTGGGGAAAACTCATCTGCACCACTAATGTGCCCTGGAACTCTAGTTGGtgatagcaagcttgcc	1	3	24	29	115	83
1753	BG505_gp41_88_C	aggaattctacgctgagtGAAAGATACCTAAGGGATCAACAGCTTCTAGGAATTTGGGGCTGCTGCGGAAAACTCATCTGCACCACTAATGTGCCCTGGAACTCTAGTTGGtgatagcaagcttgcc	6	2	42	46	183	118
1754	BG505_gp41_88_Y	aggaattctacgctgagtGAAAGATACCTAAGGGATCAACAGCTTCTAGGAATTTGGGGCTGCTACGGAAAACTCATCTGCACCACTAATGTGCCCTGGAACTCTAGTTGGtgatagcaagcttgcc	6	2	42	42	291	191
1755	BG505_gp41_88_L	aggaattctacgctgagtGAAAGATACCTAAGGGATCAACAGCTTCTAGGAATTTGGGGCTGCCTGGGAAAACTCATCTGCACCACTAATGTGCCCTGGAACTCTAGTTGGtgatagcaagcttgcc	4	12	23	96	354	212
1756	BG505_gp41_88_F	aggaattctacgctgagtGAAAGATACCTAAGGGATCAACAGCTTCTAGGAATTTGGGGCTGCTTCGGAAAACTCATCTGCACCACTAATGTGCCCTGGAACTCTAGTTGGtgatagcaagcttgcc	4	5	28	13	128	86
1757	BG505_gp41_88_Q	aggaattctacgctgagtGAAAGATACCTAAGGGATCAACAGCTTCTAGGAATTTGGGGCTGCCAGGGAAAACTCATCTGCACCACTAATGTGCCCTGGAACTCTAGTTGGtgatagcaagcttgcc	0	1	8	4	77	68
1758	BG505_gp41_88_H	aggaattctacgctgagtGAAAGATACCTAAGGGATCAACAGCTTCTAGGAATTTGGGGCTGCCACGGAAAACTCATCTGCACCACTAATGTGCCCTGGAACTCTAGTTGGtgatagcaagcttgcc	7	5	27	4	294	197
1759	BG505_gp41_88_P	aggaattctacgctgagtGAAAGATACCTAAGGGATCAACAGCTTCTAGGAATTTGGGGCTGCCCGGGAAAACTCATCTGCACCACTAATGTGCCCTGGAACTCTAGTTGGtgatagcaagcttgcc	2	0	10	32	96	65
1760	BG505_gp41_89_G	aggaattctacgctgagtAGATACCTAAGGGATCAACAGCTTCTAGGAATTTGGGGCTGCTCTGGTAAACTCATCTGCACCACTAATGTGCCCTGGAACTCTAGTTGGAGTtgatagcaagcttgcc	1	5	7	2	156	110
1761	BG505_gp41_89_E	aggaattctacgctgagtAGATACCTAAGGGATCAACAGCTTCTAGGAATTTGGGGCTGCTCTGAAAAACTCATCTGCACCACTAATGTGCCCTGGAACTCTAGTTGGAGTtgatagcaagcttgcc	1	0	30	10	148	94
1762	BG505_gp41_89_D	aggaattctacgctgagtAGATACCTAAGGGATCAACAGCTTCTAGGAATTTGGGGCTGCTCTGACAAACTCATCTGCACCACTAATGTGCCCTGGAACTCTAGTTGGAGTtgatagcaagcttgcc	4	3	14	5	110	68
1763	BG505_gp41_89_V	aggaattctacgctgagtAGATACCTAAGGGATCAACAGCTTCTAGGAATTTGGGGCTGCTCTGTTAAACTCATCTGCACCACTAATGTGCCCTGGAACTCTAGTTGGAGTtgatagcaagcttgcc	0	2	0	18	34	22
1764	BG505_gp41_89_A	aggaattctacgctgagtAGATACCTAAGGGATCAACAGCTTCTAGGAATTTGGGGCTGCTCTGCTAAACTCATCTGCACCACTAATGTGCCCTGGAACTCTAGTTGGAGTtgatagcaagcttgcc	0	3	2	18	124	93
1765	BG505_gp41_89_R	aggaattctacgctgagtAGATACCTAAGGGATCAACAGCTTCTAGGAATTTGGGGCTGCTCTCGTAAACTCATCTGCACCACTAATGTGCCCTGGAACTCTAGTTGGAGTtgatagcaagcttgcc	1	0	6	7	65	45
1766	BG505_gp41_89_S	aggaattctacgctgagtAGATACCTAAGGGATCAACAGCTTCTAGGAATTTGGGGCTGCTCTTCTAAACTCATCTGCACCACTAATGTGCCCTGGAACTCTAGTTGGAGTtgatagcaagcttgcc	1	0	7	25	99	69
1767	BG505_gp41_89_K	aggaattctacgctgagtAGATACCTAAGGGATCAACAGCTTCTAGGAATTTGGGGCTGCTCTAAAAAACTCATCTGCACCACTAATGTGCCCTGGAACTCTAGTTGGAGTtgatagcaagcttgcc	1	0	5	4	155	110
1768	BG505_gp41_89_N	aggaattctacgctgagtAGATACCTAAGGGATCAACAGCTTCTAGGAATTTGGGGCTGCTCTAACAAACTCATCTGCACCACTAATGTGCCCTGGAACTCTAGTTGGAGTtgatagcaagcttgcc	2	0	15	3	111	73
1769	BG505_gp41_89_M	aggaattctacgctgagtAGATACCTAAGGGATCAACAGCTTCTAGGAATTTGGGGCTGCTCTATGAAACTCATCTGCACCACTAATGTGCCCTGGAACTCTAGTTGGAGTtgatagcaagcttgcc	7	4	12	18	108	63
1770	BG505_gp41_89_I	aggaattctacgctgagtAGATACCTAAGGGATCAACAGCTTCTAGGAATTTGGGGCTGCTCTATCAAACTCATCTGCACCACTAATGTGCCCTGGAACTCTAGTTGGAGTtgatagcaagcttgcc	0	4	2	0	51	26
1771	BG505_gp41_89_T	aggaattctacgctgagtAGATACCTAAGGGATCAACAGCTTCTAGGAATTTGGGGCTGCTCTACCAAACTCATCTGCACCACTAATGTGCCCTGGAACTCTAGTTGGAGTtgatagcaagcttgcc	1	0	0	0	89	64
1772	BG505_gp41_89_W	aggaattctacgctgagtAGATACCTAAGGGATCAACAGCTTCTAGGAATTTGGGGCTGCTCTTGGAAACTCATCTGCACCACTAATGTGCCCTGGAACTCTAGTTGGAGTtgatagcaagcttgcc	1	2	17	0	57	31
1773	BG505_gp41_89_C	aggaattctacgctgagtAGATACCTAAGGGATCAACAGCTTCTAGGAATTTGGGGCTGCTCTTGCAAACTCATCTGCACCACTAATGTGCCCTGGAACTCTAGTTGGAGTtgatagcaagcttgcc	0	0	0	0	4	2
1774	BG505_gp41_89_Y	aggaattctacgctgagtAGATACCTAAGGGATCAACAGCTTCTAGGAATTTGGGGCTGCTCTTACAAACTCATCTGCACCACTAATGTGCCCTGGAACTCTAGTTGGAGTtgatagcaagcttgcc	1	1	2	6	69	34
1775	BG505_gp41_89_L	aggaattctacgctgagtAGATACCTAAGGGATCAACAGCTTCTAGGAATTTGGGGCTGCTCTCTGAAACTCATCTGCACCACTAATGTGCCCTGGAACTCTAGTTGGAGTtgatagcaagcttgcc	2	4	1	19	56	50
1776	BG505_gp41_89_F	aggaattctacgctgagtAGATACCTAAGGGATCAACAGCTTCTAGGAATTTGGGGCTGCTCTTTCAAACTCATCTGCACCACTAATGTGCCCTGGAACTCTAGTTGGAGTtgatagcaagcttgcc	0	0	0	7	41	29
1777	BG505_gp41_89_Q	aggaattctacgctgagtAGATACCTAAGGGATCAACAGCTTCTAGGAATTTGGGGCTGCTCTCAGAAACTCATCTGCACCACTAATGTGCCCTGGAACTCTAGTTGGAGTtgatagcaagcttgcc	1	4	11	0	115	70
1778	BG505_gp41_89_H	aggaattctacgctgagtAGATACCTAAGGGATCAACAGCTTCTAGGAATTTGGGGCTGCTCTCACAAACTCATCTGCACCACTAATGTGCCCTGGAACTCTAGTTGGAGTtgatagcaagcttgcc	4	0	0	0	126	81
1779	BG505_gp41_89_P	aggaattctacgctgagtAGATACCTAAGGGATCAACAGCTTCTAGGAATTTGGGGCTGCTCTCCGAAACTCATCTGCACCACTAATGTGCCCTGGAACTCTAGTTGGAGTtgatagcaagcttgcc	3	1	2	0	63	49
1780	BG505_gp41_90_G	aggaattctacgctgagtTACCTAAGGGATCAACAGCTTCTAGGAATTTGGGGCTGCTCTGGAGGTCTCATCTGCACCACTAATGTGCCCTGGAACTCTAGTTGGAGTAATtgatagcaagcttgcc	5	4	29	31	394	265
1781	BG505_gp41_90_E	aggaattctacgctgagtTACCTAAGGGATCAACAGCTTCTAGGAATTTGGGGCTGCTCTGGAGAACTCATCTGCACCACTAATGTGCCCTGGAACTCTAGTTGGAGTAATtgatagcaagcttgcc	4	3	10	6	209	121
1782	BG505_gp41_90_D	aggaattctacgctgagtTACCTAAGGGATCAACAGCTTCTAGGAATTTGGGGCTGCTCTGGAGACCTCATCTGCACCACTAATGTGCCCTGGAACTCTAGTTGGAGTAATtgatagcaagcttgcc	2	2	8	22	111	75
1783	BG505_gp41_90_V	aggaattctacgctgagtTACCTAAGGGATCAACAGCTTCTAGGAATTTGGGGCTGCTCTGGAGTTCTCATCTGCACCACTAATGTGCCCTGGAACTCTAGTTGGAGTAATtgatagcaagcttgcc	0	0	0	11	27	21
1784	BG505_gp41_90_A	aggaattctacgctgagtTACCTAAGGGATCAACAGCTTCTAGGAATTTGGGGCTGCTCTGGAGCTCTCATCTGCACCACTAATGTGCCCTGGAACTCTAGTTGGAGTAATtgatagcaagcttgcc	0	0	4	9	88	59
1785	BG505_gp41_90_R	aggaattctacgctgagtTACCTAAGGGATCAACAGCTTCTAGGAATTTGGGGCTGCTCTGGACGTCTCATCTGCACCACTAATGTGCCCTGGAACTCTAGTTGGAGTAATtgatagcaagcttgcc	1	1	5	9	131	81
1786	BG505_gp41_90_S	aggaattctacgctgagtTACCTAAGGGATCAACAGCTTCTAGGAATTTGGGGCTGCTCTGGATCTCTCATCTGCACCACTAATGTGCCCTGGAACTCTAGTTGGAGTAATtgatagcaagcttgcc	2	4	9	20	260	186
1787	BG505_gp41_90_K	aggaattctacgctgagtTACCTAAGGGATCAACAGCTTCTAGGAATTTGGGGCTGCTCTGGAAAACTCATCTGCACCACTAATGTGCCCTGGAACTCTAGTTGGAGTAATtgatagcaagcttgcc	9	7	30	60	296	219
1788	BG505_gp41_90_N	aggaattctacgctgagtTACCTAAGGGATCAACAGCTTCTAGGAATTTGGGGCTGCTCTGGAAACCTCATCTGCACCACTAATGTGCCCTGGAACTCTAGTTGGAGTAATtgatagcaagcttgcc	5	2	30	9	136	125
1789	BG505_gp41_90_M	aggaattctacgctgagtTACCTAAGGGATCAACAGCTTCTAGGAATTTGGGGCTGCTCTGGAATGCTCATCTGCACCACTAATGTGCCCTGGAACTCTAGTTGGAGTAATtgatagcaagcttgcc	3	1	14	2	58	44
1790	BG505_gp41_90_I	aggaattctacgctgagtTACCTAAGGGATCAACAGCTTCTAGGAATTTGGGGCTGCTCTGGAATCCTCATCTGCACCACTAATGTGCCCTGGAACTCTAGTTGGAGTAATtgatagcaagcttgcc	1	2	5	8	88	53
1791	BG505_gp41_90_T	aggaattctacgctgagtTACCTAAGGGATCAACAGCTTCTAGGAATTTGGGGCTGCTCTGGAACCCTCATCTGCACCACTAATGTGCCCTGGAACTCTAGTTGGAGTAATtgatagcaagcttgcc	0	1	6	0	90	68
1792	BG505_gp41_90_W	aggaattctacgctgagtTACCTAAGGGATCAACAGCTTCTAGGAATTTGGGGCTGCTCTGGATGGCTCATCTGCACCACTAATGTGCCCTGGAACTCTAGTTGGAGTAATtgatagcaagcttgcc	1	2	4	8	118	66
1793	BG505_gp41_90_C	aggaattctacgctgagtTACCTAAGGGATCAACAGCTTCTAGGAATTTGGGGCTGCTCTGGATGCCTCATCTGCACCACTAATGTGCCCTGGAACTCTAGTTGGAGTAATtgatagcaagcttgcc	1	3	4	0	31	28
1794	BG505_gp41_90_Y	aggaattctacgctgagtTACCTAAGGGATCAACAGCTTCTAGGAATTTGGGGCTGCTCTGGATACCTCATCTGCACCACTAATGTGCCCTGGAACTCTAGTTGGAGTAATtgatagcaagcttgcc	2	1	12	3	144	108
1795	BG505_gp41_90_L	aggaattctacgctgagtTACCTAAGGGATCAACAGCTTCTAGGAATTTGGGGCTGCTCTGGACTGCTCATCTGCACCACTAATGTGCCCTGGAACTCTAGTTGGAGTAATtgatagcaagcttgcc	4	4	12	19	95	72
1796	BG505_gp41_90_F	aggaattctacgctgagtTACCTAAGGGATCAACAGCTTCTAGGAATTTGGGGCTGCTCTGGATTCCTCATCTGCACCACTAATGTGCCCTGGAACTCTAGTTGGAGTAATtgatagcaagcttgcc	2	3	5	0	74	45
1797	BG505_gp41_90_Q	aggaattctacgctgagtTACCTAAGGGATCAACAGCTTCTAGGAATTTGGGGCTGCTCTGGACAGCTCATCTGCACCACTAATGTGCCCTGGAACTCTAGTTGGAGTAATtgatagcaagcttgcc	1	2	19	23	117	90
1798	BG505_gp41_90_H	aggaattctacgctgagtTACCTAAGGGATCAACAGCTTCTAGGAATTTGGGGCTGCTCTGGACACCTCATCTGCACCACTAATGTGCCCTGGAACTCTAGTTGGAGTAATtgatagcaagcttgcc	7	6	7	8	315	201
1799	BG505_gp41_90_P	aggaattctacgctgagtTACCTAAGGGATCAACAGCTTCTAGGAATTTGGGGCTGCTCTGGACCGCTCATCTGCACCACTAATGTGCCCTGGAACTCTAGTTGGAGTAATtgatagcaagcttgcc	1	4	22	17	205	143
1800	BG505_gp41_91_G	aggaattctacgctgagtCTAAGGGATCAACAGCTTCTAGGAATTTGGGGCTGCTCTGGAAAAGGTATCTGCACCACTAATGTGCCCTGGAACTCTAGTTGGAGTAATAGAtgatagcaagcttgcc	0	1	10	19	93	51
1801	BG505_gp41_91_E	aggaattctacgctgagtCTAAGGGATCAACAGCTTCTAGGAATTTGGGGCTGCTCTGGAAAAGAAATCTGCACCACTAATGTGCCCTGGAACTCTAGTTGGAGTAATAGAtgatagcaagcttgcc	1	0	1	0	51	21
1802	BG505_gp41_91_D	aggaattctacgctgagtCTAAGGGATCAACAGCTTCTAGGAATTTGGGGCTGCTCTGGAAAAGACATCTGCACCACTAATGTGCCCTGGAACTCTAGTTGGAGTAATAGAtgatagcaagcttgcc	1	1	4	2	75	76
1803	BG505_gp41_91_V	aggaattctacgctgagtCTAAGGGATCAACAGCTTCTAGGAATTTGGGGCTGCTCTGGAAAAGTTATCTGCACCACTAATGTGCCCTGGAACTCTAGTTGGAGTAATAGAtgatagcaagcttgcc	2	0	2	18	109	74
1804	BG505_gp41_91_A	aggaattctacgctgagtCTAAGGGATCAACAGCTTCTAGGAATTTGGGGCTGCTCTGGAAAAGCTATCTGCACCACTAATGTGCCCTGGAACTCTAGTTGGAGTAATAGAtgatagcaagcttgcc	1	2	6	20	181	136
1805	BG505_gp41_91_R	aggaattctacgctgagtCTAAGGGATCAACAGCTTCTAGGAATTTGGGGCTGCTCTGGAAAACGTATCTGCACCACTAATGTGCCCTGGAACTCTAGTTGGAGTAATAGAtgatagcaagcttgcc	5	9	1	36	168	162
1806	BG505_gp41_91_S	aggaattctacgctgagtCTAAGGGATCAACAGCTTCTAGGAATTTGGGGCTGCTCTGGAAAATCTATCTGCACCACTAATGTGCCCTGGAACTCTAGTTGGAGTAATAGAtgatagcaagcttgcc	2	3	13	2	148	118
1807	BG505_gp41_91_K	aggaattctacgctgagtCTAAGGGATCAACAGCTTCTAGGAATTTGGGGCTGCTCTGGAAAAAAAATCTGCACCACTAATGTGCCCTGGAACTCTAGTTGGAGTAATAGAtgatagcaagcttgcc	7	4	47	7	308	211
1808	BG505_gp41_91_N	aggaattctacgctgagtCTAAGGGATCAACAGCTTCTAGGAATTTGGGGCTGCTCTGGAAAAAACATCTGCACCACTAATGTGCCCTGGAACTCTAGTTGGAGTAATAGAtgatagcaagcttgcc	3	5	7	20	99	82
1809	BG505_gp41_91_M	aggaattctacgctgagtCTAAGGGATCAACAGCTTCTAGGAATTTGGGGCTGCTCTGGAAAAATGATCTGCACCACTAATGTGCCCTGGAACTCTAGTTGGAGTAATAGAtgatagcaagcttgcc	2	1	35	6	158	134
1810	BG505_gp41_91_I	aggaattctacgctgagtCTAAGGGATCAACAGCTTCTAGGAATTTGGGGCTGCTCTGGAAAAATCATCTGCACCACTAATGTGCCCTGGAACTCTAGTTGGAGTAATAGAtgatagcaagcttgcc	8	3	13	35	120	117
1811	BG505_gp41_91_T	aggaattctacgctgagtCTAAGGGATCAACAGCTTCTAGGAATTTGGGGCTGCTCTGGAAAAACCATCTGCACCACTAATGTGCCCTGGAACTCTAGTTGGAGTAATAGAtgatagcaagcttgcc	2	2	4	6	144	94
1812	BG505_gp41_91_W	aggaattctacgctgagtCTAAGGGATCAACAGCTTCTAGGAATTTGGGGCTGCTCTGGAAAATGGATCTGCACCACTAATGTGCCCTGGAACTCTAGTTGGAGTAATAGAtgatagcaagcttgcc	0	0	3	6	95	75
1813	BG505_gp41_91_C	aggaattctacgctgagtCTAAGGGATCAACAGCTTCTAGGAATTTGGGGCTGCTCTGGAAAATGCATCTGCACCACTAATGTGCCCTGGAACTCTAGTTGGAGTAATAGAtgatagcaagcttgcc	1	3	19	4	135	90
1814	BG505_gp41_91_Y	aggaattctacgctgagtCTAAGGGATCAACAGCTTCTAGGAATTTGGGGCTGCTCTGGAAAATACATCTGCACCACTAATGTGCCCTGGAACTCTAGTTGGAGTAATAGAtgatagcaagcttgcc	5	4	27	39	199	168
1815	BG505_gp41_91_L	aggaattctacgctgagtCTAAGGGATCAACAGCTTCTAGGAATTTGGGGCTGCTCTGGAAAACTGATCTGCACCACTAATGTGCCCTGGAACTCTAGTTGGAGTAATAGAtgatagcaagcttgcc	12	5	45	42	477	373
1816	BG505_gp41_91_F	aggaattctacgctgagtCTAAGGGATCAACAGCTTCTAGGAATTTGGGGCTGCTCTGGAAAATTCATCTGCACCACTAATGTGCCCTGGAACTCTAGTTGGAGTAATAGAtgatagcaagcttgcc	2	1	15	21	112	78
1817	BG505_gp41_91_Q	aggaattctacgctgagtCTAAGGGATCAACAGCTTCTAGGAATTTGGGGCTGCTCTGGAAAACAGATCTGCACCACTAATGTGCCCTGGAACTCTAGTTGGAGTAATAGAtgatagcaagcttgcc	1	3	8	9	91	58
1818	BG505_gp41_91_H	aggaattctacgctgagtCTAAGGGATCAACAGCTTCTAGGAATTTGGGGCTGCTCTGGAAAACACATCTGCACCACTAATGTGCCCTGGAACTCTAGTTGGAGTAATAGAtgatagcaagcttgcc	6	8	17	32	292	250
1819	BG505_gp41_91_P	aggaattctacgctgagtCTAAGGGATCAACAGCTTCTAGGAATTTGGGGCTGCTCTGGAAAACCGATCTGCACCACTAATGTGCCCTGGAACTCTAGTTGGAGTAATAGAtgatagcaagcttgcc	3	4	17	7	101	50
1820	BG505_gp41_92_G	aggaattctacgctgagtAGGGATCAACAGCTTCTAGGAATTTGGGGCTGCTCTGGAAAACTCGGTTGCACCACTAATGTGCCCTGGAACTCTAGTTGGAGTAATAGAAACtgatagcaagcttgcc	2	1	3	15	67	58
1821	BG505_gp41_92_E	aggaattctacgctgagtAGGGATCAACAGCTTCTAGGAATTTGGGGCTGCTCTGGAAAACTCGAATGCACCACTAATGTGCCCTGGAACTCTAGTTGGAGTAATAGAAACtgatagcaagcttgcc	3	1	9	20	68	54
1822	BG505_gp41_92_D	aggaattctacgctgagtAGGGATCAACAGCTTCTAGGAATTTGGGGCTGCTCTGGAAAACTCGACTGCACCACTAATGTGCCCTGGAACTCTAGTTGGAGTAATAGAAACtgatagcaagcttgcc	0	0	11	55	152	114
1823	BG505_gp41_92_V	aggaattctacgctgagtAGGGATCAACAGCTTCTAGGAATTTGGGGCTGCTCTGGAAAACTCGTTTGCACCACTAATGTGCCCTGGAACTCTAGTTGGAGTAATAGAAACtgatagcaagcttgcc	6	1	6	14	104	68
1824	BG505_gp41_92_A	aggaattctacgctgagtAGGGATCAACAGCTTCTAGGAATTTGGGGCTGCTCTGGAAAACTCGCTTGCACCACTAATGTGCCCTGGAACTCTAGTTGGAGTAATAGAAACtgatagcaagcttgcc	0	0	0	12	23	23
1825	BG505_gp41_92_R	aggaattctacgctgagtAGGGATCAACAGCTTCTAGGAATTTGGGGCTGCTCTGGAAAACTCCGTTGCACCACTAATGTGCCCTGGAACTCTAGTTGGAGTAATAGAAACtgatagcaagcttgcc	2	1	11	15	151	99
1826	BG505_gp41_92_S	aggaattctacgctgagtAGGGATCAACAGCTTCTAGGAATTTGGGGCTGCTCTGGAAAACTCTCTTGCACCACTAATGTGCCCTGGAACTCTAGTTGGAGTAATAGAAACtgatagcaagcttgcc	2	0	12	33	153	93
1827	BG505_gp41_92_K	aggaattctacgctgagtAGGGATCAACAGCTTCTAGGAATTTGGGGCTGCTCTGGAAAACTCAAATGCACCACTAATGTGCCCTGGAACTCTAGTTGGAGTAATAGAAACtgatagcaagcttgcc	6	0	30	18	203	214
1828	BG505_gp41_92_N	aggaattctacgctgagtAGGGATCAACAGCTTCTAGGAATTTGGGGCTGCTCTGGAAAACTCAACTGCACCACTAATGTGCCCTGGAACTCTAGTTGGAGTAATAGAAACtgatagcaagcttgcc	2	2	7	5	163	104
1829	BG505_gp41_92_M	aggaattctacgctgagtAGGGATCAACAGCTTCTAGGAATTTGGGGCTGCTCTGGAAAACTCATGTGCACCACTAATGTGCCCTGGAACTCTAGTTGGAGTAATAGAAACtgatagcaagcttgcc	3	3	19	49	93	67
1830	BG505_gp41_92_I	aggaattctacgctgagtAGGGATCAACAGCTTCTAGGAATTTGGGGCTGCTCTGGAAAACTCATCTGCACCACTAATGTGCCCTGGAACTCTAGTTGGAGTAATAGAAACtgatagcaagcttgcc	5	1	12	12	156	101
1831	BG505_gp41_92_T	aggaattctacgctgagtAGGGATCAACAGCTTCTAGGAATTTGGGGCTGCTCTGGAAAACTCACCTGCACCACTAATGTGCCCTGGAACTCTAGTTGGAGTAATAGAAACtgatagcaagcttgcc	0	0	0	11	43	11
1832	BG505_gp41_92_W	aggaattctacgctgagtAGGGATCAACAGCTTCTAGGAATTTGGGGCTGCTCTGGAAAACTCTGGTGCACCACTAATGTGCCCTGGAACTCTAGTTGGAGTAATAGAAACtgatagcaagcttgcc	1	1	10	8	156	114
1833	BG505_gp41_92_C	aggaattctacgctgagtAGGGATCAACAGCTTCTAGGAATTTGGGGCTGCTCTGGAAAACTCTGCTGCACCACTAATGTGCCCTGGAACTCTAGTTGGAGTAATAGAAACtgatagcaagcttgcc	4	1	8	2	123	83
1834	BG505_gp41_92_Y	aggaattctacgctgagtAGGGATCAACAGCTTCTAGGAATTTGGGGCTGCTCTGGAAAACTCTACTGCACCACTAATGTGCCCTGGAACTCTAGTTGGAGTAATAGAAACtgatagcaagcttgcc	1	0	6	31	150	123
1835	BG505_gp41_92_L	aggaattctacgctgagtAGGGATCAACAGCTTCTAGGAATTTGGGGCTGCTCTGGAAAACTCCTGTGCACCACTAATGTGCCCTGGAACTCTAGTTGGAGTAATAGAAACtgatagcaagcttgcc	0	2	4	6	75	66
1836	BG505_gp41_92_F	aggaattctacgctgagtAGGGATCAACAGCTTCTAGGAATTTGGGGCTGCTCTGGAAAACTCTTCTGCACCACTAATGTGCCCTGGAACTCTAGTTGGAGTAATAGAAACtgatagcaagcttgcc	1	6	2	1	217	130
1837	BG505_gp41_92_Q	aggaattctacgctgagtAGGGATCAACAGCTTCTAGGAATTTGGGGCTGCTCTGGAAAACTCCAGTGCACCACTAATGTGCCCTGGAACTCTAGTTGGAGTAATAGAAACtgatagcaagcttgcc	2	1	8	8	73	69
1838	BG505_gp41_92_H	aggaattctacgctgagtAGGGATCAACAGCTTCTAGGAATTTGGGGCTGCTCTGGAAAACTCCACTGCACCACTAATGTGCCCTGGAACTCTAGTTGGAGTAATAGAAACtgatagcaagcttgcc	3	0	1	6	76	58
1839	BG505_gp41_92_P	aggaattctacgctgagtAGGGATCAACAGCTTCTAGGAATTTGGGGCTGCTCTGGAAAACTCCCGTGCACCACTAATGTGCCCTGGAACTCTAGTTGGAGTAATAGAAACtgatagcaagcttgcc	2	1	2	19	76	57
1840	BG505_gp41_93_G	aggaattctacgctgagtGATCAACAGCTTCTAGGAATTTGGGGCTGCTCTGGAAAACTCATCGGTACCACTAATGTGCCCTGGAACTCTAGTTGGAGTAATAGAAACCTGtgatagcaagcttgcc	1	4	12	20	199	128
1841	BG505_gp41_93_E	aggaattctacgctgagtGATCAACAGCTTCTAGGAATTTGGGGCTGCTCTGGAAAACTCATCGAAACCACTAATGTGCCCTGGAACTCTAGTTGGAGTAATAGAAACCTGtgatagcaagcttgcc	5	10	18	36	404	286
1842	BG505_gp41_93_D	aggaattctacgctgagtGATCAACAGCTTCTAGGAATTTGGGGCTGCTCTGGAAAACTCATCGACACCACTAATGTGCCCTGGAACTCTAGTTGGAGTAATAGAAACCTGtgatagcaagcttgcc	3	1	8	0	224	179
1843	BG505_gp41_93_V	aggaattctacgctgagtGATCAACAGCTTCTAGGAATTTGGGGCTGCTCTGGAAAACTCATCGTTACCACTAATGTGCCCTGGAACTCTAGTTGGAGTAATAGAAACCTGtgatagcaagcttgcc	9	6	32	11	281	202
1844	BG505_gp41_93_A	aggaattctacgctgagtGATCAACAGCTTCTAGGAATTTGGGGCTGCTCTGGAAAACTCATCGCTACCACTAATGTGCCCTGGAACTCTAGTTGGAGTAATAGAAACCTGtgatagcaagcttgcc	3	3	11	0	272	194
1845	BG505_gp41_93_R	aggaattctacgctgagtGATCAACAGCTTCTAGGAATTTGGGGCTGCTCTGGAAAACTCATCCGTACCACTAATGTGCCCTGGAACTCTAGTTGGAGTAATAGAAACCTGtgatagcaagcttgcc	9	11	17	29	412	277
1846	BG505_gp41_93_S	aggaattctacgctgagtGATCAACAGCTTCTAGGAATTTGGGGCTGCTCTGGAAAACTCATCTCTACCACTAATGTGCCCTGGAACTCTAGTTGGAGTAATAGAAACCTGtgatagcaagcttgcc	12	12	48	13	509	386
1847	BG505_gp41_93_K	aggaattctacgctgagtGATCAACAGCTTCTAGGAATTTGGGGCTGCTCTGGAAAACTCATCAAAACCACTAATGTGCCCTGGAACTCTAGTTGGAGTAATAGAAACCTGtgatagcaagcttgcc	0	5	5	0	230	117
1848	BG505_gp41_93_N	aggaattctacgctgagtGATCAACAGCTTCTAGGAATTTGGGGCTGCTCTGGAAAACTCATCAACACCACTAATGTGCCCTGGAACTCTAGTTGGAGTAATAGAAACCTGtgatagcaagcttgcc	3	3	7	101	185	148
1849	BG505_gp41_93_M	aggaattctacgctgagtGATCAACAGCTTCTAGGAATTTGGGGCTGCTCTGGAAAACTCATCATGACCACTAATGTGCCCTGGAACTCTAGTTGGAGTAATAGAAACCTGtgatagcaagcttgcc	6	7	63	25	326	217
1850	BG505_gp41_93_I	aggaattctacgctgagtGATCAACAGCTTCTAGGAATTTGGGGCTGCTCTGGAAAACTCATCATCACCACTAATGTGCCCTGGAACTCTAGTTGGAGTAATAGAAACCTGtgatagcaagcttgcc	7	4	5	5	127	86
1851	BG505_gp41_93_T	aggaattctacgctgagtGATCAACAGCTTCTAGGAATTTGGGGCTGCTCTGGAAAACTCATCACCACCACTAATGTGCCCTGGAACTCTAGTTGGAGTAATAGAAACCTGtgatagcaagcttgcc	6	4	14	14	264	184
1852	BG505_gp41_93_W	aggaattctacgctgagtGATCAACAGCTTCTAGGAATTTGGGGCTGCTCTGGAAAACTCATCTGGACCACTAATGTGCCCTGGAACTCTAGTTGGAGTAATAGAAACCTGtgatagcaagcttgcc	9	8	43	88	494	334
1853	BG505_gp41_93_C	aggaattctacgctgagtGATCAACAGCTTCTAGGAATTTGGGGCTGCTCTGGAAAACTCATCTGCACCACTAATGTGCCCTGGAACTCTAGTTGGAGTAATAGAAACCTGtgatagcaagcttgcc	9	3	32	30	308	191
1854	BG505_gp41_93_Y	aggaattctacgctgagtGATCAACAGCTTCTAGGAATTTGGGGCTGCTCTGGAAAACTCATCTACACCACTAATGTGCCCTGGAACTCTAGTTGGAGTAATAGAAACCTGtgatagcaagcttgcc	1	1	5	9	100	46
1855	BG505_gp41_93_L	aggaattctacgctgagtGATCAACAGCTTCTAGGAATTTGGGGCTGCTCTGGAAAACTCATCCTGACCACTAATGTGCCCTGGAACTCTAGTTGGAGTAATAGAAACCTGtgatagcaagcttgcc	6	4	17	24	253	208
1856	BG505_gp41_93_F	aggaattctacgctgagtGATCAACAGCTTCTAGGAATTTGGGGCTGCTCTGGAAAACTCATCTTCACCACTAATGTGCCCTGGAACTCTAGTTGGAGTAATAGAAACCTGtgatagcaagcttgcc	12	6	18	71	352	254
1857	BG505_gp41_93_Q	aggaattctacgctgagtGATCAACAGCTTCTAGGAATTTGGGGCTGCTCTGGAAAACTCATCCAGACCACTAATGTGCCCTGGAACTCTAGTTGGAGTAATAGAAACCTGtgatagcaagcttgcc	6	3	13	27	218	155
1858	BG505_gp41_93_H	aggaattctacgctgagtGATCAACAGCTTCTAGGAATTTGGGGCTGCTCTGGAAAACTCATCCACACCACTAATGTGCCCTGGAACTCTAGTTGGAGTAATAGAAACCTGtgatagcaagcttgcc	4	1	44	2	190	167
1859	BG505_gp41_93_P	aggaattctacgctgagtGATCAACAGCTTCTAGGAATTTGGGGCTGCTCTGGAAAACTCATCCCGACCACTAATGTGCCCTGGAACTCTAGTTGGAGTAATAGAAACCTGtgatagcaagcttgcc	18	13	52	56	697	519
1860	BG505_gp41_94_G	aggaattctacgctgagtCAACAGCTTCTAGGAATTTGGGGCTGCTCTGGAAAACTCATCTGCGGTACTAATGTGCCCTGGAACTCTAGTTGGAGTAATAGAAACCTGAGTtgatagcaagcttgcc	6	7	5	73	206	141
1861	BG505_gp41_94_E	aggaattctacgctgagtCAACAGCTTCTAGGAATTTGGGGCTGCTCTGGAAAACTCATCTGCGAAACTAATGTGCCCTGGAACTCTAGTTGGAGTAATAGAAACCTGAGTtgatagcaagcttgcc	2	4	8	47	200	132
1862	BG505_gp41_94_D	aggaattctacgctgagtCAACAGCTTCTAGGAATTTGGGGCTGCTCTGGAAAACTCATCTGCGACACTAATGTGCCCTGGAACTCTAGTTGGAGTAATAGAAACCTGAGTtgatagcaagcttgcc	4	6	3	8	163	103
1863	BG505_gp41_94_V	aggaattctacgctgagtCAACAGCTTCTAGGAATTTGGGGCTGCTCTGGAAAACTCATCTGCGTTACTAATGTGCCCTGGAACTCTAGTTGGAGTAATAGAAACCTGAGTtgatagcaagcttgcc	2	3	22	18	189	131
1864	BG505_gp41_94_A	aggaattctacgctgagtCAACAGCTTCTAGGAATTTGGGGCTGCTCTGGAAAACTCATCTGCGCTACTAATGTGCCCTGGAACTCTAGTTGGAGTAATAGAAACCTGAGTtgatagcaagcttgcc	5	5	39	23	176	143
1865	BG505_gp41_94_R	aggaattctacgctgagtCAACAGCTTCTAGGAATTTGGGGCTGCTCTGGAAAACTCATCTGCCGTACTAATGTGCCCTGGAACTCTAGTTGGAGTAATAGAAACCTGAGTtgatagcaagcttgcc	5	8	36	66	280	159
1866	BG505_gp41_94_S	aggaattctacgctgagtCAACAGCTTCTAGGAATTTGGGGCTGCTCTGGAAAACTCATCTGCTCTACTAATGTGCCCTGGAACTCTAGTTGGAGTAATAGAAACCTGAGTtgatagcaagcttgcc	5	2	22	12	166	128
1867	BG505_gp41_94_K	aggaattctacgctgagtCAACAGCTTCTAGGAATTTGGGGCTGCTCTGGAAAACTCATCTGCAAAACTAATGTGCCCTGGAACTCTAGTTGGAGTAATAGAAACCTGAGTtgatagcaagcttgcc	7	5	33	67	312	230
1868	BG505_gp41_94_N	aggaattctacgctgagtCAACAGCTTCTAGGAATTTGGGGCTGCTCTGGAAAACTCATCTGCAACACTAATGTGCCCTGGAACTCTAGTTGGAGTAATAGAAACCTGAGTtgatagcaagcttgcc	2	2	9	22	239	155
1869	BG505_gp41_94_M	aggaattctacgctgagtCAACAGCTTCTAGGAATTTGGGGCTGCTCTGGAAAACTCATCTGCATGACTAATGTGCCCTGGAACTCTAGTTGGAGTAATAGAAACCTGAGTtgatagcaagcttgcc	3	5	8	13	183	149
1870	BG505_gp41_94_I	aggaattctacgctgagtCAACAGCTTCTAGGAATTTGGGGCTGCTCTGGAAAACTCATCTGCATCACTAATGTGCCCTGGAACTCTAGTTGGAGTAATAGAAACCTGAGTtgatagcaagcttgcc	1	2	24	25	126	81
1871	BG505_gp41_94_T	aggaattctacgctgagtCAACAGCTTCTAGGAATTTGGGGCTGCTCTGGAAAACTCATCTGCACCACTAATGTGCCCTGGAACTCTAGTTGGAGTAATAGAAACCTGAGTtgatagcaagcttgcc	8	11	27	111	434	309
1872	BG505_gp41_94_W	aggaattctacgctgagtCAACAGCTTCTAGGAATTTGGGGCTGCTCTGGAAAACTCATCTGCTGGACTAATGTGCCCTGGAACTCTAGTTGGAGTAATAGAAACCTGAGTtgatagcaagcttgcc	1	0	29	53	173	123
1873	BG505_gp41_94_C	aggaattctacgctgagtCAACAGCTTCTAGGAATTTGGGGCTGCTCTGGAAAACTCATCTGCTGCACTAATGTGCCCTGGAACTCTAGTTGGAGTAATAGAAACCTGAGTtgatagcaagcttgcc	6	7	10	30	241	170
1874	BG505_gp41_94_Y	aggaattctacgctgagtCAACAGCTTCTAGGAATTTGGGGCTGCTCTGGAAAACTCATCTGCTACACTAATGTGCCCTGGAACTCTAGTTGGAGTAATAGAAACCTGAGTtgatagcaagcttgcc	0	2	27	60	243	184
1875	BG505_gp41_94_L	aggaattctacgctgagtCAACAGCTTCTAGGAATTTGGGGCTGCTCTGGAAAACTCATCTGCCTGACTAATGTGCCCTGGAACTCTAGTTGGAGTAATAGAAACCTGAGTtgatagcaagcttgcc	1	7	29	36	397	241
1876	BG505_gp41_94_F	aggaattctacgctgagtCAACAGCTTCTAGGAATTTGGGGCTGCTCTGGAAAACTCATCTGCTTCACTAATGTGCCCTGGAACTCTAGTTGGAGTAATAGAAACCTGAGTtgatagcaagcttgcc	5	4	8	7	122	105
1877	BG505_gp41_94_Q	aggaattctacgctgagtCAACAGCTTCTAGGAATTTGGGGCTGCTCTGGAAAACTCATCTGCCAGACTAATGTGCCCTGGAACTCTAGTTGGAGTAATAGAAACCTGAGTtgatagcaagcttgcc	5	6	43	58	380	231
1878	BG505_gp41_94_H	aggaattctacgctgagtCAACAGCTTCTAGGAATTTGGGGCTGCTCTGGAAAACTCATCTGCCACACTAATGTGCCCTGGAACTCTAGTTGGAGTAATAGAAACCTGAGTtgatagcaagcttgcc	2	2	34	24	209	134
1879	BG505_gp41_94_P	aggaattctacgctgagtCAACAGCTTCTAGGAATTTGGGGCTGCTCTGGAAAACTCATCTGCCCGACTAATGTGCCCTGGAACTCTAGTTGGAGTAATAGAAACCTGAGTtgatagcaagcttgcc	8	2	29	22	342	203
1880	BG505_gp41_95_G	aggaattctacgctgagtCAGCTTCTAGGAATTTGGGGCTGCTCTGGAAAACTCATCTGCACCGGTAATGTGCCCTGGAACTCTAGTTGGAGTAATAGAAACCTGAGTGAGtgatagcaagcttgcc	1	0	5	12	46	49
1881	BG505_gp41_95_E	aggaattctacgctgagtCAGCTTCTAGGAATTTGGGGCTGCTCTGGAAAACTCATCTGCACCGAAAATGTGCCCTGGAACTCTAGTTGGAGTAATAGAAACCTGAGTGAGtgatagcaagcttgcc	3	10	23	70	219	137
1882	BG505_gp41_95_D	aggaattctacgctgagtCAGCTTCTAGGAATTTGGGGCTGCTCTGGAAAACTCATCTGCACCGACAATGTGCCCTGGAACTCTAGTTGGAGTAATAGAAACCTGAGTGAGtgatagcaagcttgcc	3	5	34	57	283	179
1883	BG505_gp41_95_V	aggaattctacgctgagtCAGCTTCTAGGAATTTGGGGCTGCTCTGGAAAACTCATCTGCACCGTTAATGTGCCCTGGAACTCTAGTTGGAGTAATAGAAACCTGAGTGAGtgatagcaagcttgcc	2	3	31	24	207	149
1884	BG505_gp41_95_A	aggaattctacgctgagtCAGCTTCTAGGAATTTGGGGCTGCTCTGGAAAACTCATCTGCACCGCTAATGTGCCCTGGAACTCTAGTTGGAGTAATAGAAACCTGAGTGAGtgatagcaagcttgcc	1	2	10	2	58	40
1885	BG505_gp41_95_R	aggaattctacgctgagtCAGCTTCTAGGAATTTGGGGCTGCTCTGGAAAACTCATCTGCACCCGTAATGTGCCCTGGAACTCTAGTTGGAGTAATAGAAACCTGAGTGAGtgatagcaagcttgcc	3	4	26	54	283	233
1886	BG505_gp41_95_S	aggaattctacgctgagtCAGCTTCTAGGAATTTGGGGCTGCTCTGGAAAACTCATCTGCACCTCTAATGTGCCCTGGAACTCTAGTTGGAGTAATAGAAACCTGAGTGAGtgatagcaagcttgcc	4	5	22	31	243	160
1887	BG505_gp41_95_K	aggaattctacgctgagtCAGCTTCTAGGAATTTGGGGCTGCTCTGGAAAACTCATCTGCACCAAAAATGTGCCCTGGAACTCTAGTTGGAGTAATAGAAACCTGAGTGAGtgatagcaagcttgcc	2	9	16	18	126	82
1888	BG505_gp41_95_N	aggaattctacgctgagtCAGCTTCTAGGAATTTGGGGCTGCTCTGGAAAACTCATCTGCACCAACAATGTGCCCTGGAACTCTAGTTGGAGTAATAGAAACCTGAGTGAGtgatagcaagcttgcc	2	3	4	0	92	59
1889	BG505_gp41_95_M	aggaattctacgctgagtCAGCTTCTAGGAATTTGGGGCTGCTCTGGAAAACTCATCTGCACCATGAATGTGCCCTGGAACTCTAGTTGGAGTAATAGAAACCTGAGTGAGtgatagcaagcttgcc	5	5	95	91	414	217
1890	BG505_gp41_95_I	aggaattctacgctgagtCAGCTTCTAGGAATTTGGGGCTGCTCTGGAAAACTCATCTGCACCATCAATGTGCCCTGGAACTCTAGTTGGAGTAATAGAAACCTGAGTGAGtgatagcaagcttgcc	3	9	14	15	237	159
1891	BG505_gp41_95_T	aggaattctacgctgagtCAGCTTCTAGGAATTTGGGGCTGCTCTGGAAAACTCATCTGCACCACCAATGTGCCCTGGAACTCTAGTTGGAGTAATAGAAACCTGAGTGAGtgatagcaagcttgcc	3	2	59	17	213	125
1892	BG505_gp41_95_W	aggaattctacgctgagtCAGCTTCTAGGAATTTGGGGCTGCTCTGGAAAACTCATCTGCACCTGGAATGTGCCCTGGAACTCTAGTTGGAGTAATAGAAACCTGAGTGAGtgatagcaagcttgcc	1	2	1	5	56	26
1893	BG505_gp41_95_C	aggaattctacgctgagtCAGCTTCTAGGAATTTGGGGCTGCTCTGGAAAACTCATCTGCACCTGCAATGTGCCCTGGAACTCTAGTTGGAGTAATAGAAACCTGAGTGAGtgatagcaagcttgcc	1	3	35	1	123	95
1894	BG505_gp41_95_Y	aggaattctacgctgagtCAGCTTCTAGGAATTTGGGGCTGCTCTGGAAAACTCATCTGCACCTACAATGTGCCCTGGAACTCTAGTTGGAGTAATAGAAACCTGAGTGAGtgatagcaagcttgcc	4	9	39	4	159	119
1895	BG505_gp41_95_L	aggaattctacgctgagtCAGCTTCTAGGAATTTGGGGCTGCTCTGGAAAACTCATCTGCACCCTGAATGTGCCCTGGAACTCTAGTTGGAGTAATAGAAACCTGAGTGAGtgatagcaagcttgcc	2	0	25	10	142	103
1896	BG505_gp41_95_F	aggaattctacgctgagtCAGCTTCTAGGAATTTGGGGCTGCTCTGGAAAACTCATCTGCACCTTCAATGTGCCCTGGAACTCTAGTTGGAGTAATAGAAACCTGAGTGAGtgatagcaagcttgcc	1	3	19	18	115	86
1897	BG505_gp41_95_Q	aggaattctacgctgagtCAGCTTCTAGGAATTTGGGGCTGCTCTGGAAAACTCATCTGCACCCAGAATGTGCCCTGGAACTCTAGTTGGAGTAATAGAAACCTGAGTGAGtgatagcaagcttgcc	4	1	7	16	184	153
1898	BG505_gp41_95_H	aggaattctacgctgagtCAGCTTCTAGGAATTTGGGGCTGCTCTGGAAAACTCATCTGCACCCACAATGTGCCCTGGAACTCTAGTTGGAGTAATAGAAACCTGAGTGAGtgatagcaagcttgcc	4	2	3	13	133	74
1899	BG505_gp41_95_P	aggaattctacgctgagtCAGCTTCTAGGAATTTGGGGCTGCTCTGGAAAACTCATCTGCACCCCGAATGTGCCCTGGAACTCTAGTTGGAGTAATAGAAACCTGAGTGAGtgatagcaagcttgcc	8	10	21	72	381	273
1900	BG505_gp41_96_G	aggaattctacgctgagtCTTCTAGGAATTTGGGGCTGCTCTGGAAAACTCATCTGCACCACTGGTGTGCCCTGGAACTCTAGTTGGAGTAATAGAAACCTGAGTGAGATAtgatagcaagcttgcc	1	0	0	0	32	31
1901	BG505_gp41_96_E	aggaattctacgctgagtCTTCTAGGAATTTGGGGCTGCTCTGGAAAACTCATCTGCACCACTGAAGTGCCCTGGAACTCTAGTTGGAGTAATAGAAACCTGAGTGAGATAtgatagcaagcttgcc	0	0	3	0	11	6
1902	BG505_gp41_96_D	aggaattctacgctgagtCTTCTAGGAATTTGGGGCTGCTCTGGAAAACTCATCTGCACCACTGACGTGCCCTGGAACTCTAGTTGGAGTAATAGAAACCTGAGTGAGATAtgatagcaagcttgcc	1	1	3	24	85	74
1903	BG505_gp41_96_V	aggaattctacgctgagtCTTCTAGGAATTTGGGGCTGCTCTGGAAAACTCATCTGCACCACTGTTGTGCCCTGGAACTCTAGTTGGAGTAATAGAAACCTGAGTGAGATAtgatagcaagcttgcc	0	0	0	0	35	7
1904	BG505_gp41_96_A	aggaattctacgctgagtCTTCTAGGAATTTGGGGCTGCTCTGGAAAACTCATCTGCACCACTGCTGTGCCCTGGAACTCTAGTTGGAGTAATAGAAACCTGAGTGAGATAtgatagcaagcttgcc	3	2	0	0	18	14
1905	BG505_gp41_96_R	aggaattctacgctgagtCTTCTAGGAATTTGGGGCTGCTCTGGAAAACTCATCTGCACCACTCGTGTGCCCTGGAACTCTAGTTGGAGTAATAGAAACCTGAGTGAGATAtgatagcaagcttgcc	2	0	1	0	34	28
1906	BG505_gp41_96_S	aggaattctacgctgagtCTTCTAGGAATTTGGGGCTGCTCTGGAAAACTCATCTGCACCACTTCTGTGCCCTGGAACTCTAGTTGGAGTAATAGAAACCTGAGTGAGATAtgatagcaagcttgcc	4	0	0	3	52	34
1907	BG505_gp41_96_K	aggaattctacgctgagtCTTCTAGGAATTTGGGGCTGCTCTGGAAAACTCATCTGCACCACTAAAGTGCCCTGGAACTCTAGTTGGAGTAATAGAAACCTGAGTGAGATAtgatagcaagcttgcc	2	2	2	0	38	18
1908	BG505_gp41_96_N	aggaattctacgctgagtCTTCTAGGAATTTGGGGCTGCTCTGGAAAACTCATCTGCACCACTAACGTGCCCTGGAACTCTAGTTGGAGTAATAGAAACCTGAGTGAGATAtgatagcaagcttgcc	0	0	1	0	39	29
1909	BG505_gp41_96_M	aggaattctacgctgagtCTTCTAGGAATTTGGGGCTGCTCTGGAAAACTCATCTGCACCACTATGGTGCCCTGGAACTCTAGTTGGAGTAATAGAAACCTGAGTGAGATAtgatagcaagcttgcc	0	2	0	3	26	31
1910	BG505_gp41_96_I	aggaattctacgctgagtCTTCTAGGAATTTGGGGCTGCTCTGGAAAACTCATCTGCACCACTATCGTGCCCTGGAACTCTAGTTGGAGTAATAGAAACCTGAGTGAGATAtgatagcaagcttgcc	0	1	10	0	59	43
1911	BG505_gp41_96_T	aggaattctacgctgagtCTTCTAGGAATTTGGGGCTGCTCTGGAAAACTCATCTGCACCACTACCGTGCCCTGGAACTCTAGTTGGAGTAATAGAAACCTGAGTGAGATAtgatagcaagcttgcc	1	2	6	12	29	26
1912	BG505_gp41_96_W	aggaattctacgctgagtCTTCTAGGAATTTGGGGCTGCTCTGGAAAACTCATCTGCACCACTTGGGTGCCCTGGAACTCTAGTTGGAGTAATAGAAACCTGAGTGAGATAtgatagcaagcttgcc	0	0	1	0	27	13
1913	BG505_gp41_96_C	aggaattctacgctgagtCTTCTAGGAATTTGGGGCTGCTCTGGAAAACTCATCTGCACCACTTGCGTGCCCTGGAACTCTAGTTGGAGTAATAGAAACCTGAGTGAGATAtgatagcaagcttgcc	3	0	0	27	51	40
1914	BG505_gp41_96_Y	aggaattctacgctgagtCTTCTAGGAATTTGGGGCTGCTCTGGAAAACTCATCTGCACCACTTACGTGCCCTGGAACTCTAGTTGGAGTAATAGAAACCTGAGTGAGATAtgatagcaagcttgcc	0	0	1	0	22	22
1915	BG505_gp41_96_L	aggaattctacgctgagtCTTCTAGGAATTTGGGGCTGCTCTGGAAAACTCATCTGCACCACTCTGGTGCCCTGGAACTCTAGTTGGAGTAATAGAAACCTGAGTGAGATAtgatagcaagcttgcc	1	0	19	8	90	69
1916	BG505_gp41_96_F	aggaattctacgctgagtCTTCTAGGAATTTGGGGCTGCTCTGGAAAACTCATCTGCACCACTTTCGTGCCCTGGAACTCTAGTTGGAGTAATAGAAACCTGAGTGAGATAtgatagcaagcttgcc	0	0	4	2	18	23
1917	BG505_gp41_96_Q	aggaattctacgctgagtCTTCTAGGAATTTGGGGCTGCTCTGGAAAACTCATCTGCACCACTCAGGTGCCCTGGAACTCTAGTTGGAGTAATAGAAACCTGAGTGAGATAtgatagcaagcttgcc	0	1	5	9	42	28
1918	BG505_gp41_96_H	aggaattctacgctgagtCTTCTAGGAATTTGGGGCTGCTCTGGAAAACTCATCTGCACCACTCACGTGCCCTGGAACTCTAGTTGGAGTAATAGAAACCTGAGTGAGATAtgatagcaagcttgcc	1	0	1	31	70	61
1919	BG505_gp41_96_P	aggaattctacgctgagtCTTCTAGGAATTTGGGGCTGCTCTGGAAAACTCATCTGCACCACTCCGGTGCCCTGGAACTCTAGTTGGAGTAATAGAAACCTGAGTGAGATAtgatagcaagcttgcc	1	1	15	13	52	46
1920	BG505_gp41_97_G	aggaattctacgctgagtCTAGGAATTTGGGGCTGCTCTGGAAAACTCATCTGCACCACTAATGGTCCCTGGAACTCTAGTTGGAGTAATAGAAACCTGAGTGAGATATGGtgatagcaagcttgcc	3	6	3	45	91	80
1921	BG505_gp41_97_E	aggaattctacgctgagtCTAGGAATTTGGGGCTGCTCTGGAAAACTCATCTGCACCACTAATGAACCCTGGAACTCTAGTTGGAGTAATAGAAACCTGAGTGAGATATGGtgatagcaagcttgcc	1	2	7	20	36	36
1922	BG505_gp41_97_D	aggaattctacgctgagtCTAGGAATTTGGGGCTGCTCTGGAAAACTCATCTGCACCACTAATGACCCCTGGAACTCTAGTTGGAGTAATAGAAACCTGAGTGAGATATGGtgatagcaagcttgcc	1	3	8	10	160	188
1923	BG505_gp41_97_V	aggaattctacgctgagtCTAGGAATTTGGGGCTGCTCTGGAAAACTCATCTGCACCACTAATGTTCCCTGGAACTCTAGTTGGAGTAATAGAAACCTGAGTGAGATATGGtgatagcaagcttgcc	0	2	5	6	87	96
1924	BG505_gp41_97_A	aggaattctacgctgagtCTAGGAATTTGGGGCTGCTCTGGAAAACTCATCTGCACCACTAATGCTCCCTGGAACTCTAGTTGGAGTAATAGAAACCTGAGTGAGATATGGtgatagcaagcttgcc	3	4	24	23	130	106
1925	BG505_gp41_97_R	aggaattctacgctgagtCTAGGAATTTGGGGCTGCTCTGGAAAACTCATCTGCACCACTAATCGTCCCTGGAACTCTAGTTGGAGTAATAGAAACCTGAGTGAGATATGGtgatagcaagcttgcc	1	0	2	0	88	84
1926	BG505_gp41_97_S	aggaattctacgctgagtCTAGGAATTTGGGGCTGCTCTGGAAAACTCATCTGCACCACTAATTCTCCCTGGAACTCTAGTTGGAGTAATAGAAACCTGAGTGAGATATGGtgatagcaagcttgcc	1	1	5	22	64	64
1927	BG505_gp41_97_K	aggaattctacgctgagtCTAGGAATTTGGGGCTGCTCTGGAAAACTCATCTGCACCACTAATAAACCCTGGAACTCTAGTTGGAGTAATAGAAACCTGAGTGAGATATGGtgatagcaagcttgcc	0	2	1	1	54	65
1928	BG505_gp41_97_N	aggaattctacgctgagtCTAGGAATTTGGGGCTGCTCTGGAAAACTCATCTGCACCACTAATAACCCCTGGAACTCTAGTTGGAGTAATAGAAACCTGAGTGAGATATGGtgatagcaagcttgcc	1	0	0	43	57	55
1929	BG505_gp41_97_M	aggaattctacgctgagtCTAGGAATTTGGGGCTGCTCTGGAAAACTCATCTGCACCACTAATATGCCCTGGAACTCTAGTTGGAGTAATAGAAACCTGAGTGAGATATGGtgatagcaagcttgcc	1	0	13	2	60	38
1930	BG505_gp41_97_I	aggaattctacgctgagtCTAGGAATTTGGGGCTGCTCTGGAAAACTCATCTGCACCACTAATATCCCCTGGAACTCTAGTTGGAGTAATAGAAACCTGAGTGAGATATGGtgatagcaagcttgcc	1	5	15	16	125	133
1931	BG505_gp41_97_T	aggaattctacgctgagtCTAGGAATTTGGGGCTGCTCTGGAAAACTCATCTGCACCACTAATACCCCCTGGAACTCTAGTTGGAGTAATAGAAACCTGAGTGAGATATGGtgatagcaagcttgcc	0	1	12	21	57	58
1932	BG505_gp41_97_W	aggaattctacgctgagtCTAGGAATTTGGGGCTGCTCTGGAAAACTCATCTGCACCACTAATTGGCCCTGGAACTCTAGTTGGAGTAATAGAAACCTGAGTGAGATATGGtgatagcaagcttgcc	2	4	0	13	106	75
1933	BG505_gp41_97_C	aggaattctacgctgagtCTAGGAATTTGGGGCTGCTCTGGAAAACTCATCTGCACCACTAATTGCCCCTGGAACTCTAGTTGGAGTAATAGAAACCTGAGTGAGATATGGtgatagcaagcttgcc	0	0	0	5	57	44
1934	BG505_gp41_97_Y	aggaattctacgctgagtCTAGGAATTTGGGGCTGCTCTGGAAAACTCATCTGCACCACTAATTACCCCTGGAACTCTAGTTGGAGTAATAGAAACCTGAGTGAGATATGGtgatagcaagcttgcc	2	3	7	5	150	133
1935	BG505_gp41_97_L	aggaattctacgctgagtCTAGGAATTTGGGGCTGCTCTGGAAAACTCATCTGCACCACTAATCTGCCCTGGAACTCTAGTTGGAGTAATAGAAACCTGAGTGAGATATGGtgatagcaagcttgcc	1	2	6	1	103	102
1936	BG505_gp41_97_F	aggaattctacgctgagtCTAGGAATTTGGGGCTGCTCTGGAAAACTCATCTGCACCACTAATTTCCCCTGGAACTCTAGTTGGAGTAATAGAAACCTGAGTGAGATATGGtgatagcaagcttgcc	3	2	11	21	131	125
1937	BG505_gp41_97_Q	aggaattctacgctgagtCTAGGAATTTGGGGCTGCTCTGGAAAACTCATCTGCACCACTAATCAGCCCTGGAACTCTAGTTGGAGTAATAGAAACCTGAGTGAGATATGGtgatagcaagcttgcc	0	0	1	5	64	51
1938	BG505_gp41_97_H	aggaattctacgctgagtCTAGGAATTTGGGGCTGCTCTGGAAAACTCATCTGCACCACTAATCACCCCTGGAACTCTAGTTGGAGTAATAGAAACCTGAGTGAGATATGGtgatagcaagcttgcc	1	2	1	10	61	47
1939	BG505_gp41_97_P	aggaattctacgctgagtCTAGGAATTTGGGGCTGCTCTGGAAAACTCATCTGCACCACTAATCCGCCCTGGAACTCTAGTTGGAGTAATAGAAACCTGAGTGAGATATGGtgatagcaagcttgcc	1	1	8	12	78	63
1940	BG505_gp41_98_G	aggaattctacgctgagtGGAATTTGGGGCTGCTCTGGAAAACTCATCTGCACCACTAATGTGGGTTGGAACTCTAGTTGGAGTAATAGAAACCTGAGTGAGATATGGGACtgatagcaagcttgcc	5	1	4	20	249	195
1941	BG505_gp41_98_E	aggaattctacgctgagtGGAATTTGGGGCTGCTCTGGAAAACTCATCTGCACCACTAATGTGGAATGGAACTCTAGTTGGAGTAATAGAAACCTGAGTGAGATATGGGACtgatagcaagcttgcc	1	2	1	44	64	54
1942	BG505_gp41_98_D	aggaattctacgctgagtGGAATTTGGGGCTGCTCTGGAAAACTCATCTGCACCACTAATGTGGACTGGAACTCTAGTTGGAGTAATAGAAACCTGAGTGAGATATGGGACtgatagcaagcttgcc	1	0	0	0	72	75
1943	BG505_gp41_98_V	aggaattctacgctgagtGGAATTTGGGGCTGCTCTGGAAAACTCATCTGCACCACTAATGTGGTTTGGAACTCTAGTTGGAGTAATAGAAACCTGAGTGAGATATGGGACtgatagcaagcttgcc	4	0	7	22	111	97
1944	BG505_gp41_98_A	aggaattctacgctgagtGGAATTTGGGGCTGCTCTGGAAAACTCATCTGCACCACTAATGTGGCTTGGAACTCTAGTTGGAGTAATAGAAACCTGAGTGAGATATGGGACtgatagcaagcttgcc	1	0	11	0	63	74
1945	BG505_gp41_98_R	aggaattctacgctgagtGGAATTTGGGGCTGCTCTGGAAAACTCATCTGCACCACTAATGTGCGTTGGAACTCTAGTTGGAGTAATAGAAACCTGAGTGAGATATGGGACtgatagcaagcttgcc	3	3	8	3	104	77
1946	BG505_gp41_98_S	aggaattctacgctgagtGGAATTTGGGGCTGCTCTGGAAAACTCATCTGCACCACTAATGTGTCTTGGAACTCTAGTTGGAGTAATAGAAACCTGAGTGAGATATGGGACtgatagcaagcttgcc	0	1	1	0	78	39
1947	BG505_gp41_98_K	aggaattctacgctgagtGGAATTTGGGGCTGCTCTGGAAAACTCATCTGCACCACTAATGTGAAATGGAACTCTAGTTGGAGTAATAGAAACCTGAGTGAGATATGGGACtgatagcaagcttgcc	0	0	0	0	30	17
1948	BG505_gp41_98_N	aggaattctacgctgagtGGAATTTGGGGCTGCTCTGGAAAACTCATCTGCACCACTAATGTGAACTGGAACTCTAGTTGGAGTAATAGAAACCTGAGTGAGATATGGGACtgatagcaagcttgcc	0	3	0	0	26	23
1949	BG505_gp41_98_M	aggaattctacgctgagtGGAATTTGGGGCTGCTCTGGAAAACTCATCTGCACCACTAATGTGATGTGGAACTCTAGTTGGAGTAATAGAAACCTGAGTGAGATATGGGACtgatagcaagcttgcc	1	2	40	4	125	136
1950	BG505_gp41_98_I	aggaattctacgctgagtGGAATTTGGGGCTGCTCTGGAAAACTCATCTGCACCACTAATGTGATCTGGAACTCTAGTTGGAGTAATAGAAACCTGAGTGAGATATGGGACtgatagcaagcttgcc	3	2	12	11	108	85
1951	BG505_gp41_98_T	aggaattctacgctgagtGGAATTTGGGGCTGCTCTGGAAAACTCATCTGCACCACTAATGTGACCTGGAACTCTAGTTGGAGTAATAGAAACCTGAGTGAGATATGGGACtgatagcaagcttgcc	3	6	22	12	199	134
1952	BG505_gp41_98_W	aggaattctacgctgagtGGAATTTGGGGCTGCTCTGGAAAACTCATCTGCACCACTAATGTGTGGTGGAACTCTAGTTGGAGTAATAGAAACCTGAGTGAGATATGGGACtgatagcaagcttgcc	3	2	11	3	96	67
1953	BG505_gp41_98_C	aggaattctacgctgagtGGAATTTGGGGCTGCTCTGGAAAACTCATCTGCACCACTAATGTGTGCTGGAACTCTAGTTGGAGTAATAGAAACCTGAGTGAGATATGGGACtgatagcaagcttgcc	1	0	17	13	72	50
1954	BG505_gp41_98_Y	aggaattctacgctgagtGGAATTTGGGGCTGCTCTGGAAAACTCATCTGCACCACTAATGTGTACTGGAACTCTAGTTGGAGTAATAGAAACCTGAGTGAGATATGGGACtgatagcaagcttgcc	1	2	8	21	96	78
1955	BG505_gp41_98_L	aggaattctacgctgagtGGAATTTGGGGCTGCTCTGGAAAACTCATCTGCACCACTAATGTGCTGTGGAACTCTAGTTGGAGTAATAGAAACCTGAGTGAGATATGGGACtgatagcaagcttgcc	0	0	6	32	68	49
1956	BG505_gp41_98_F	aggaattctacgctgagtGGAATTTGGGGCTGCTCTGGAAAACTCATCTGCACCACTAATGTGTTCTGGAACTCTAGTTGGAGTAATAGAAACCTGAGTGAGATATGGGACtgatagcaagcttgcc	1	2	0	0	70	59
1957	BG505_gp41_98_Q	aggaattctacgctgagtGGAATTTGGGGCTGCTCTGGAAAACTCATCTGCACCACTAATGTGCAGTGGAACTCTAGTTGGAGTAATAGAAACCTGAGTGAGATATGGGACtgatagcaagcttgcc	2	1	8	1	71	49
1958	BG505_gp41_98_H	aggaattctacgctgagtGGAATTTGGGGCTGCTCTGGAAAACTCATCTGCACCACTAATGTGCACTGGAACTCTAGTTGGAGTAATAGAAACCTGAGTGAGATATGGGACtgatagcaagcttgcc	1	0	4	3	133	97
1959	BG505_gp41_98_P	aggaattctacgctgagtGGAATTTGGGGCTGCTCTGGAAAACTCATCTGCACCACTAATGTGCCGTGGAACTCTAGTTGGAGTAATAGAAACCTGAGTGAGATATGGGACtgatagcaagcttgcc	3	2	35	60	199	199
1960	BG505_gp41_99_G	aggaattctacgctgagtATTTGGGGCTGCTCTGGAAAACTCATCTGCACCACTAATGTGCCCGGTAACTCTAGTTGGAGTAATAGAAACCTGAGTGAGATATGGGACAACtgatagcaagcttgcc	0	0	0	0	28	19
1961	BG505_gp41_99_E	aggaattctacgctgagtATTTGGGGCTGCTCTGGAAAACTCATCTGCACCACTAATGTGCCCGAAAACTCTAGTTGGAGTAATAGAAACCTGAGTGAGATATGGGACAACtgatagcaagcttgcc	1	0	0	0	54	39
1962	BG505_gp41_99_D	aggaattctacgctgagtATTTGGGGCTGCTCTGGAAAACTCATCTGCACCACTAATGTGCCCGACAACTCTAGTTGGAGTAATAGAAACCTGAGTGAGATATGGGACAACtgatagcaagcttgcc	0	0	0	12	21	22
1963	BG505_gp41_99_V	aggaattctacgctgagtATTTGGGGCTGCTCTGGAAAACTCATCTGCACCACTAATGTGCCCGTTAACTCTAGTTGGAGTAATAGAAACCTGAGTGAGATATGGGACAACtgatagcaagcttgcc	0	1	1	1	5	5
1964	BG505_gp41_99_A	aggaattctacgctgagtATTTGGGGCTGCTCTGGAAAACTCATCTGCACCACTAATGTGCCCGCTAACTCTAGTTGGAGTAATAGAAACCTGAGTGAGATATGGGACAACtgatagcaagcttgcc	1	2	0	1	55	58
1965	BG505_gp41_99_R	aggaattctacgctgagtATTTGGGGCTGCTCTGGAAAACTCATCTGCACCACTAATGTGCCCCGTAACTCTAGTTGGAGTAATAGAAACCTGAGTGAGATATGGGACAACtgatagcaagcttgcc	0	0	0	3	49	31
1966	BG505_gp41_99_S	aggaattctacgctgagtATTTGGGGCTGCTCTGGAAAACTCATCTGCACCACTAATGTGCCCTCTAACTCTAGTTGGAGTAATAGAAACCTGAGTGAGATATGGGACAACtgatagcaagcttgcc	1	0	3	1	26	16
1967	BG505_gp41_99_K	aggaattctacgctgagtATTTGGGGCTGCTCTGGAAAACTCATCTGCACCACTAATGTGCCCAAAAACTCTAGTTGGAGTAATAGAAACCTGAGTGAGATATGGGACAACtgatagcaagcttgcc	0	0	0	0	4	0
1968	BG505_gp41_99_N	aggaattctacgctgagtATTTGGGGCTGCTCTGGAAAACTCATCTGCACCACTAATGTGCCCAACAACTCTAGTTGGAGTAATAGAAACCTGAGTGAGATATGGGACAACtgatagcaagcttgcc	0	0	0	10	17	14
1969	BG505_gp41_99_M	aggaattctacgctgagtATTTGGGGCTGCTCTGGAAAACTCATCTGCACCACTAATGTGCCCATGAACTCTAGTTGGAGTAATAGAAACCTGAGTGAGATATGGGACAACtgatagcaagcttgcc	1	0	0	16	38	22
1970	BG505_gp41_99_I	aggaattctacgctgagtATTTGGGGCTGCTCTGGAAAACTCATCTGCACCACTAATGTGCCCATCAACTCTAGTTGGAGTAATAGAAACCTGAGTGAGATATGGGACAACtgatagcaagcttgcc	1	1	0	0	21	13
1971	BG505_gp41_99_T	aggaattctacgctgagtATTTGGGGCTGCTCTGGAAAACTCATCTGCACCACTAATGTGCCCACCAACTCTAGTTGGAGTAATAGAAACCTGAGTGAGATATGGGACAACtgatagcaagcttgcc	0	0	0	0	1	0
1972	BG505_gp41_99_W	aggaattctacgctgagtATTTGGGGCTGCTCTGGAAAACTCATCTGCACCACTAATGTGCCCTGGAACTCTAGTTGGAGTAATAGAAACCTGAGTGAGATATGGGACAACtgatagcaagcttgcc	0	1	1	25	103	85
1973	BG505_gp41_99_C	aggaattctacgctgagtATTTGGGGCTGCTCTGGAAAACTCATCTGCACCACTAATGTGCCCTGCAACTCTAGTTGGAGTAATAGAAACCTGAGTGAGATATGGGACAACtgatagcaagcttgcc	0	0	1	7	50	47
1974	BG505_gp41_99_Y	aggaattctacgctgagtATTTGGGGCTGCTCTGGAAAACTCATCTGCACCACTAATGTGCCCTACAACTCTAGTTGGAGTAATAGAAACCTGAGTGAGATATGGGACAACtgatagcaagcttgcc	0	0	12	18	41	42
1975	BG505_gp41_99_L	aggaattctacgctgagtATTTGGGGCTGCTCTGGAAAACTCATCTGCACCACTAATGTGCCCCTGAACTCTAGTTGGAGTAATAGAAACCTGAGTGAGATATGGGACAACtgatagcaagcttgcc	0	2	0	0	25	12
1976	BG505_gp41_99_F	aggaattctacgctgagtATTTGGGGCTGCTCTGGAAAACTCATCTGCACCACTAATGTGCCCTTCAACTCTAGTTGGAGTAATAGAAACCTGAGTGAGATATGGGACAACtgatagcaagcttgcc	0	0	0	0	9	4
1977	BG505_gp41_99_Q	aggaattctacgctgagtATTTGGGGCTGCTCTGGAAAACTCATCTGCACCACTAATGTGCCCCAGAACTCTAGTTGGAGTAATAGAAACCTGAGTGAGATATGGGACAACtgatagcaagcttgcc	1	0	0	8	26	19
1978	BG505_gp41_99_H	aggaattctacgctgagtATTTGGGGCTGCTCTGGAAAACTCATCTGCACCACTAATGTGCCCCACAACTCTAGTTGGAGTAATAGAAACCTGAGTGAGATATGGGACAACtgatagcaagcttgcc	0	1	2	0	41	46
1979	BG505_gp41_99_P	aggaattctacgctgagtATTTGGGGCTGCTCTGGAAAACTCATCTGCACCACTAATGTGCCCCCGAACTCTAGTTGGAGTAATAGAAACCTGAGTGAGATATGGGACAACtgatagcaagcttgcc	0	2	0	51	124	108
1980	BG505_gp41_100_G	aggaattctacgctgagtTGGGGCTGCTCTGGAAAACTCATCTGCACCACTAATGTGCCCTGGGGTTCTAGTTGGAGTAATAGAAACCTGAGTGAGATATGGGACAACATGtgatagcaagcttgcc	6	14	43	57	701	561
1981	BG505_gp41_100_E	aggaattctacgctgagtTGGGGCTGCTCTGGAAAACTCATCTGCACCACTAATGTGCCCTGGGAATCTAGTTGGAGTAATAGAAACCTGAGTGAGATATGGGACAACATGtgatagcaagcttgcc	1	3	12	2	146	111
1982	BG505_gp41_100_D	aggaattctacgctgagtTGGGGCTGCTCTGGAAAACTCATCTGCACCACTAATGTGCCCTGGGACTCTAGTTGGAGTAATAGAAACCTGAGTGAGATATGGGACAACATGtgatagcaagcttgcc	2	3	9	41	150	127
1983	BG505_gp41_100_V	aggaattctacgctgagtTGGGGCTGCTCTGGAAAACTCATCTGCACCACTAATGTGCCCTGGGTTTCTAGTTGGAGTAATAGAAACCTGAGTGAGATATGGGACAACATGtgatagcaagcttgcc	0	0	15	3	171	117
1984	BG505_gp41_100_A	aggaattctacgctgagtTGGGGCTGCTCTGGAAAACTCATCTGCACCACTAATGTGCCCTGGGCTTCTAGTTGGAGTAATAGAAACCTGAGTGAGATATGGGACAACATGtgatagcaagcttgcc	6	5	12	28	313	230
1985	BG505_gp41_100_R	aggaattctacgctgagtTGGGGCTGCTCTGGAAAACTCATCTGCACCACTAATGTGCCCTGGCGTTCTAGTTGGAGTAATAGAAACCTGAGTGAGATATGGGACAACATGtgatagcaagcttgcc	6	2	25	2	115	104
1986	BG505_gp41_100_S	aggaattctacgctgagtTGGGGCTGCTCTGGAAAACTCATCTGCACCACTAATGTGCCCTGGTCTTCTAGTTGGAGTAATAGAAACCTGAGTGAGATATGGGACAACATGtgatagcaagcttgcc	2	1	4	33	149	75
1987	BG505_gp41_100_K	aggaattctacgctgagtTGGGGCTGCTCTGGAAAACTCATCTGCACCACTAATGTGCCCTGGAAATCTAGTTGGAGTAATAGAAACCTGAGTGAGATATGGGACAACATGtgatagcaagcttgcc	1	7	3	14	81	50
1988	BG505_gp41_100_N	aggaattctacgctgagtTGGGGCTGCTCTGGAAAACTCATCTGCACCACTAATGTGCCCTGGAACTCTAGTTGGAGTAATAGAAACCTGAGTGAGATATGGGACAACATGtgatagcaagcttgcc	6	9	16	23	391	331
1989	BG505_gp41_100_M	aggaattctacgctgagtTGGGGCTGCTCTGGAAAACTCATCTGCACCACTAATGTGCCCTGGATGTCTAGTTGGAGTAATAGAAACCTGAGTGAGATATGGGACAACATGtgatagcaagcttgcc	6	2	22	43	303	221
1990	BG505_gp41_100_I	aggaattctacgctgagtTGGGGCTGCTCTGGAAAACTCATCTGCACCACTAATGTGCCCTGGATCTCTAGTTGGAGTAATAGAAACCTGAGTGAGATATGGGACAACATGtgatagcaagcttgcc	5	4	15	17	228	183
1991	BG505_gp41_100_T	aggaattctacgctgagtTGGGGCTGCTCTGGAAAACTCATCTGCACCACTAATGTGCCCTGGACCTCTAGTTGGAGTAATAGAAACCTGAGTGAGATATGGGACAACATGtgatagcaagcttgcc	5	4	21	11	378	243
1992	BG505_gp41_100_W	aggaattctacgctgagtTGGGGCTGCTCTGGAAAACTCATCTGCACCACTAATGTGCCCTGGTGGTCTAGTTGGAGTAATAGAAACCTGAGTGAGATATGGGACAACATGtgatagcaagcttgcc	8	8	9	8	225	153
1993	BG505_gp41_100_C	aggaattctacgctgagtTGGGGCTGCTCTGGAAAACTCATCTGCACCACTAATGTGCCCTGGTGCTCTAGTTGGAGTAATAGAAACCTGAGTGAGATATGGGACAACATGtgatagcaagcttgcc	2	2	24	1	101	75
1994	BG505_gp41_100_Y	aggaattctacgctgagtTGGGGCTGCTCTGGAAAACTCATCTGCACCACTAATGTGCCCTGGTACTCTAGTTGGAGTAATAGAAACCTGAGTGAGATATGGGACAACATGtgatagcaagcttgcc	7	7	33	33	261	223
1995	BG505_gp41_100_L	aggaattctacgctgagtTGGGGCTGCTCTGGAAAACTCATCTGCACCACTAATGTGCCCTGGCTGTCTAGTTGGAGTAATAGAAACCTGAGTGAGATATGGGACAACATGtgatagcaagcttgcc	10	9	20	62	343	251
1996	BG505_gp41_100_F	aggaattctacgctgagtTGGGGCTGCTCTGGAAAACTCATCTGCACCACTAATGTGCCCTGGTTCTCTAGTTGGAGTAATAGAAACCTGAGTGAGATATGGGACAACATGtgatagcaagcttgcc	5	10	38	40	357	275
1997	BG505_gp41_100_Q	aggaattctacgctgagtTGGGGCTGCTCTGGAAAACTCATCTGCACCACTAATGTGCCCTGGCAGTCTAGTTGGAGTAATAGAAACCTGAGTGAGATATGGGACAACATGtgatagcaagcttgcc	5	4	15	24	158	123
1998	BG505_gp41_100_H	aggaattctacgctgagtTGGGGCTGCTCTGGAAAACTCATCTGCACCACTAATGTGCCCTGGCACTCTAGTTGGAGTAATAGAAACCTGAGTGAGATATGGGACAACATGtgatagcaagcttgcc	1	3	18	0	240	178
[truncated: 10,481 more rows]
